# Supplementary material for: Patterns of Recombination Activity on Mouse Chromosome 11 Revealed by High Resolution Mapping
Source: PLoS One. 2010 Dec 8;5(12):e15340. doi: 10.1371/journal.pone.0015340 (PMC2999565; doi:10.1371/journal.pone.0015340)
Supplement: Table S3 — Correlations between recombination rates and different genomic features at different window sizes. To identify genomic patterns associated with recombination hotspots, we tested the correlation between recombination rates and genomic features. In total, 19 features were examined: the GC content, gene density, exon density, number of transcription start sites, and 15 classes of repetitive elements. In order to compare recombination rate with genomic features, the chromosome was divided into several adjacent, non-overlapping windows. The minimum size of the window was determined by the average interval between SNPs used to identify recombination hot spots. Exact points of recombination are not known. Rather, it is the interval between SNPs where recombination has taken place. Subdivision of these regions may result in a false positive. For example, if recombination events took place in a 100 kb region and this is divided in half, it is not known how many recombinations took place in either half. This will lead to false correlations for regions where recombination was falsely assumed. The distribution of these intervals was bi-modal with peaks around 50 kb and 200 kb. These densities were the result of the hotspot detection process as successive round of assays focused on smaller regions. Minimum window size must be at least equal to the largest of these peaks to minimize disruption. Based on these results, we tested for correlation in window sizes of 200 kb to 1,000 kb in 100 kb increments for a total of nine window sizes. Correlations were also performed for window sizes from 50 kb to 100 kb in 10 kb increments. Focus of the analysis was on the 200 kb to 1,000 kb range. Windows were defined beginning at 3 Mb and ending at 121.7 Mb, spanning all markers used to detect recombination. The recombination rate for each window was computed as the sum of the recombination rates of the observed regions. When a region fell across multiple windows, the each window received a fr [file pone.0015340.s003.xlsx]

## Sheet: Genes
cross	50Kb	50Kb	60Kb	60Kb	70Kb	70Kb	80Kb	80Kb	90Kb	90Kb	100Kb	100Kb	200Kb	200Kb	300Kb	300Kb	400Kb	400Kb	500Kb	500Kb	600Kb	600Kb	700Kb	700Kb	800Kb	800Kb	900Kb	900Kb	1Mb	1Mb
f(B6xCAST) cM	-0.0247903	0.2271	-0.0250959	0.2644	-0.0275031	0.2573	-0.039527	0.1279	-0.0313268	0.2554	-0.0379756	0.1909	-0.0442017	0.2821	-0.0417195	0.4077	-0.0553038	0.3422	-0.0385542	0.5539	-0.0994316	0.1634	-0.100807	0.1909	-0.119047	0.1482	-0.0641678	0.4648	-0.0434534	0.6389
f(CASTxB6) cM	-0.0414789	0.04321	-0.0425478	0.05837	-0.0459378	0.05842	-0.0637593	0.01399	-0.0590764	0.03186	-0.0657241	0.02349	-0.0803593	0.05028	-0.114614	0.02254	-0.0997773	0.08606	-0.0918638	0.1577	-0.153798	0.03052	-0.171925	0.02497	-0.142423	0.08315	-0.108659	0.2149	-0.106655	0.2483
m(B6xCAST) cM	0.0130206	0.5258	0.0132976	0.5543	0.00948768	0.696	-0.00447119	0.8633	0.00921065	0.7381	0.00310664	0.9148	0.00871189	0.8322	0.0302203	0.5488	0.0491339	0.3988	0.109498	0.0919	0.0922133	0.1963	0.0851641	0.2695	0.122749	0.1359	0.201084	0.02078	0.15511	0.0921
m(CASTxB6) cM	0.0216481	0.2915	0.022423	0.3186	0.0196049	0.4195	0.00755073	0.7713	0.0163081	0.5539	0.0114752	0.6928	0.026353	0.5215	0.0420059	0.4045	0.0637931	0.2731	0.0900054	0.1663	0.0627455	0.3798	0.0657541	0.3943	0.108417	0.1881	0.172495	0.04795	0.133034	0.1492
female cM	-0.0352353	0.08595	-0.0358998	0.1103	-0.0389933	0.1082	-0.0546361	0.03527	-0.0478171	0.08245	-0.054711	0.05941	-0.0654819	0.1109	-0.082542	0.101	-0.081661	0.1604	-0.0689216	0.2896	-0.133042	0.06169	-0.142227	0.06429	-0.134919	0.1009	-0.0899007	0.3053	-0.0786759	0.395
male cM	0.0182233	0.3746	0.0188114	0.4028	0.0154819	0.5238	0.00195821	0.9399	0.0135026	0.624	0.00778017	0.7888	0.0186513	0.6501	0.0377128	0.4542	0.0587966	0.3126	0.102892	0.1134	0.0792769	0.2669	0.0773816	0.3159	0.11871	0.1493	0.191803	0.02758	0.147272	0.11
average cM	-0.00590843	0.7735	-0.00635313	0.7775	-0.0102156	0.674	-0.0256831	0.3226	-0.0156764	0.5693	-0.0227157	0.4341	-0.0211488	0.607	-0.0190339	0.7057	-0.0044467	0.9392	0.0273789	0.6743	-0.0190872	0.7895	-0.0216289	0.7795	0.00308336	0.9702	0.0712625	0.4168	0.0550418	0.5521
cross	50Kb	50Kb	60Kb	60Kb	70Kb	70Kb	80Kb	80Kb	90Kb	90Kb	100Kb	100Kb	200Kb	200Kb	300Kb	300Kb	400Kb	400Kb	500Kb	500Kb	600Kb	600Kb	700Kb	700Kb	800Kb	800Kb	900Kb	900Kb	1Mb	1Mb
f(B6xCAST) cM/Mb	-0.0247903	0.2271	-0.0250958	0.2644	-0.0275031	0.2573	-0.039527	0.1279	-0.0313268	0.2554	-0.0379755	0.1909	-0.0442017	0.2821	-0.0417194	0.4077	-0.0553038	0.3422	-0.0385542	0.5539	-0.0994315	0.1634	-0.100807	0.1909	-0.119047	0.1482	-0.0641678	0.4648	-0.0434534	0.6389
f(CASTxB6) cM/Mb	-0.0414789	0.04321	-0.0425477	0.05837	-0.0459378	0.05842	-0.0637593	0.01399	-0.0590763	0.03186	-0.0657241	0.02349	-0.0803594	0.05028	-0.114614	0.02254	-0.0997773	0.08606	-0.0918638	0.1577	-0.153798	0.03052	-0.171925	0.02497	-0.142423	0.08315	-0.108659	0.2149	-0.106655	0.2483
m(B6xCAST) cM/Mb	0.0130206	0.5258	0.0132976	0.5543	0.00948776	0.696	-0.00447117	0.8633	0.00921073	0.7381	0.00310666	0.9148	0.00871189	0.8322	0.0302202	0.5488	0.0491339	0.3988	0.109498	0.0919	0.0922133	0.1963	0.0851641	0.2695	0.122749	0.1359	0.201084	0.02078	0.15511	0.0921
m(CASTxB6) cM/Mb	0.0216482	0.2915	0.022423	0.3186	0.0196049	0.4195	0.00755069	0.7713	0.0163081	0.5539	0.0114751	0.6928	0.0263531	0.5215	0.0420059	0.4045	0.0637931	0.2731	0.0900054	0.1663	0.0627456	0.3798	0.0657541	0.3943	0.108417	0.1881	0.172495	0.04795	0.133034	0.1492
female cM/Mb	-0.0352352	0.08595	-0.0358997	0.1103	-0.0389934	0.1082	-0.0546361	0.03527	-0.047817	0.08245	-0.054711	0.05941	-0.0654818	0.1109	-0.0825419	0.101	-0.0816611	0.1604	-0.0689217	0.2896	-0.133043	0.06169	-0.142227	0.06429	-0.134919	0.1009	-0.0899008	0.3053	-0.0786759	0.395
male cM/Mb	0.0182233	0.3746	0.0188114	0.4028	0.0154818	0.5238	0.00195822	0.9399	0.0135025	0.624	0.00778015	0.7888	0.0186513	0.6501	0.0377127	0.4542	0.0587966	0.3126	0.102892	0.1134	0.0792769	0.2669	0.0773816	0.3159	0.11871	0.1493	0.191803	0.02758	0.147272	0.11
average cM/Mb	-0.0059085	0.7735	-0.00635317	0.7775	-0.0102155	0.674	-0.025683	0.3226	-0.0156762	0.5693	-0.0227157	0.4341	-0.0211488	0.607	-0.019034	0.7057	-0.00444665	0.9392	0.0273789	0.6743	-0.0190871	0.7895	-0.0216288	0.7795	0.00308333	0.9702	0.0712623	0.4168	0.0550418	0.5521
f(B6xCAST) cM		0		0		0		0		0		0		0		0		0		0		0		0		0		0		0
f(CASTxB6) cM		111111		222		222		111111		111111		111111		222		111111		222		0		111111		111111		222		0		0
m(B6xCAST) cM		0		0		0		0		0		0		0		0		0		222		0		0		0		111111		222
m(CASTxB6) cM		0		0		0		0		0		0		0		0		0		0		0		0		0		111111		0
female cM		222		0		0		111111		222		222		0		0		0		0		222		222		0		0		0
male cM		0		0		0		0		0		0		0		0		0		0		0		0		0		111111		0
average cM		0		0		0		0		0		0		0		0		0		0		0		0		0		0		0

## Sheet: Exons
cross	50Kb	50Kb	60Kb	60Kb	70Kb	70Kb	80Kb	80Kb	90Kb	90Kb	100Kb	100Kb	200Kb	200Kb	300Kb	300Kb	400Kb	400Kb	500Kb	500Kb	600Kb	600Kb	700Kb	700Kb	800Kb	800Kb	900Kb	900Kb	1Mb	1Mb
f(B6xCAST) cM	-0.0391637	0.0563	-0.0409371	0.06858	-0.0510855	0.0353	-0.0536012	0.03889	-0.0545399	0.04758	-0.06478	0.02556	-0.0641306	0.1184	-0.0963323	0.05544	-0.0850559	0.1437	-0.133301	0.0399	-0.140432	0.04846	-0.122815	0.1106	-0.117782	0.1525	-0.146483	0.09374	-0.144539	0.1168
f(CASTxB6) cM	-0.046189	0.02436	-0.0496923	0.02703	-0.0593358	0.01447	-0.0673228	0.009457	-0.0683369	0.01302	-0.0836088	0.003929	-0.0995664	0.0152	-0.125881	0.01217	-0.123243	0.03375	-0.160439	0.01321	-0.176135	0.01306	-0.18	0.01883	-0.151297	0.06549	-0.16244	0.06276	-0.209366	0.0223
m(B6xCAST) cM	0.0089951	0.6612	0.0100711	0.6542	0.00298761	0.9021	0.00103583	0.9682	0.0118479	0.6671	0.00613691	0.8327	0.0173114	0.6737	0.02609	0.6047	0.0601622	0.3014	0.0816112	0.2097	0.0698997	0.3278	0.0933139	0.2262	0.133018	0.1058	0.141529	0.1055	0.151766	0.09942
m(CASTxB6) cM	0.0175622	0.3922	0.0213628	0.3421	0.0144537	0.5517	0.0211377	0.4157	0.0261002	0.3434	0.0153522	0.5971	0.036359	0.3764	0.0381567	0.4489	0.0877185	0.1315	0.0878616	0.1767	0.093014	0.1925	0.120306	0.1181	0.152779	0.06287	0.162619	0.06246	0.152647	0.09745
female cM	-0.0450386	0.02814	-0.0477578	0.03359	-0.0581203	0.01661	-0.0636178	0.01421	-0.0645704	0.01897	-0.0779117	0.007217	-0.0859322	0.03628	-0.116483	0.02042	-0.109343	0.05982	-0.15298	0.0182	-0.165629	0.0197	-0.157731	0.03995	-0.139122	0.09062	-0.159564	0.06762	-0.183924	0.04525
male cM	0.0140182	0.4946	0.0166662	0.4586	0.00948842	0.696	0.0121168	0.6408	0.0202049	0.4633	0.011391	0.6949	0.0283469	0.4905	0.0335978	0.505	0.0771649	0.1848	0.0882278	0.1749	0.0848609	0.2346	0.111489	0.1478	0.147773	0.0721	0.157299	0.07166	0.156499	0.0892
average cM	-0.0132917	0.5173	-0.0135571	0.5466	-0.0234149	0.3349	-0.0238543	0.3583	-0.0199645	0.4686	-0.0321597	0.268	-0.0253775	0.537	-0.0389577	0.4395	-0.00692836	0.9054	-0.024615	0.7056	-0.0324822	0.6496	-0.0075279	0.9224	0.0188852	0.8192	0.0125556	0.8864	0.00903291	0.9223
cross	50Kb	50Kb	60Kb	60Kb	70Kb	70Kb	80Kb	80Kb	90Kb	90Kb	100Kb	100Kb	200Kb	200Kb	300Kb	300Kb	400Kb	400Kb	500Kb	500Kb	600Kb	600Kb	700Kb	700Kb	800Kb	800Kb	900Kb	900Kb	1Mb	1Mb
f(B6xCAST) cM/Mb	-0.0391638	0.0563	-0.0409372	0.06858	-0.0510855	0.0353	-0.0536012	0.03889	-0.05454	0.04758	-0.06478	0.02556	-0.0641306	0.1184	-0.0963323	0.05544	-0.0850559	0.1437	-0.133301	0.0399	-0.140432	0.04846	-0.122815	0.1106	-0.117782	0.1525	-0.146483	0.09374	-0.144539	0.1168
f(CASTxB6) cM/Mb	-0.046189	0.02436	-0.0496922	0.02703	-0.0593358	0.01447	-0.0673228	0.009457	-0.0683369	0.01302	-0.0836089	0.003929	-0.0995665	0.0152	-0.125881	0.01217	-0.123243	0.03375	-0.160439	0.01321	-0.176135	0.01306	-0.18	0.01883	-0.151297	0.06549	-0.16244	0.06276	-0.209366	0.0223
m(B6xCAST) cM/Mb	0.00899516	0.6612	0.0100711	0.6543	0.00298766	0.902	0.00103587	0.9682	0.0118479	0.6671	0.0061369	0.8327	0.0173113	0.6737	0.0260899	0.6047	0.0601622	0.3014	0.0816113	0.2097	0.0698998	0.3278	0.093314	0.2262	0.133018	0.1058	0.141528	0.1055	0.151766	0.09942
m(CASTxB6) cM/Mb	0.0175622	0.3922	0.0213629	0.3421	0.0144537	0.5517	0.0211377	0.4157	0.0261002	0.3434	0.0153522	0.5971	0.0363591	0.3764	0.0381567	0.4489	0.0877185	0.1315	0.0878616	0.1767	0.093014	0.1925	0.120306	0.1181	0.152779	0.06287	0.162618	0.06246	0.152647	0.09745
female cM/Mb	-0.0450386	0.02814	-0.0477576	0.03359	-0.0581203	0.01661	-0.0636179	0.01421	-0.0645704	0.01897	-0.0779116	0.007217	-0.0859322	0.03628	-0.116483	0.02042	-0.109343	0.05982	-0.15298	0.0182	-0.16563	0.0197	-0.157731	0.03995	-0.139122	0.09062	-0.159564	0.06762	-0.183924	0.04525
male cM/Mb	0.0140182	0.4946	0.0166662	0.4586	0.00948837	0.696	0.0121168	0.6408	0.0202049	0.4633	0.011391	0.6949	0.0283469	0.4905	0.0335978	0.505	0.0771649	0.1848	0.0882279	0.1749	0.0848609	0.2346	0.111489	0.1478	0.147773	0.0721	0.157299	0.07166	0.156499	0.0892
average cM/Mb	-0.0132916	0.5173	-0.0135571	0.5466	-0.0234149	0.3349	-0.0238544	0.3583	-0.0199644	0.4686	-0.0321598	0.268	-0.0253776	0.537	-0.0389578	0.4395	-0.0069283	0.9054	-0.024615	0.7056	-0.0324822	0.6496	-0.00752788	0.9224	0.0188851	0.8192	0.0125556	0.8864	0.00903291	0.9223
f(B6xCAST) cM		222		222		111111		111111		111111		111111		0		222		0		111111		111111		0		0		222		0
f(CASTxB6) cM		111111		111111		111111		111111		111111		111111		111111		111111		111111		111111		111111		111111		222		222		111111
m(B6xCAST) cM		0		0		0		0		0		0		0		0		0		0		0		0		0		0		222
m(CASTxB6) cM		0		0		0		0		0		0		0		0		0		0		0		0		222		222		222
female cM		111111		111111		111111		111111		111111		111111		111111		111111		222		111111		111111		111111		222		222		111111
male cM		0		0		0		0		0		0		0		0		0		0		0		0		222		222		222
average cM		0		0		0		0		0		0		0		0		0		0		0		0		0		0		0

## Sheet: tss
cross	50Kb	50Kb	60Kb	60Kb	70Kb	70Kb	80Kb	80Kb	90Kb	90Kb	100Kb	100Kb	200Kb	200Kb	300Kb	300Kb	400Kb	400Kb	500Kb	500Kb	600Kb	600Kb	700Kb	700Kb	800Kb	800Kb	900Kb	900Kb	1Mb	1Mb
f(B6xCAST) cM	-0.0388677	0.05819	-0.0418271	0.06277	-0.0453846	0.06152	-0.0461207	0.07561	-0.0517937	0.05994	-0.061091	0.03526	-0.0671217	0.1022	-0.0927767	0.06513	-0.0917316	0.1147	-0.113348	0.08097	-0.126737	0.0752	-0.10045	0.1925	-0.109185	0.185	-0.138778	0.1125	-0.113756	0.218
f(CASTxB6) cM	-0.0406121	0.04777	-0.0437073	0.05183	-0.0502011	0.0386	-0.0521499	0.0445	-0.0620652	0.02413	-0.0721939	0.01281	-0.0818986	0.04602	-0.101543	0.04343	-0.106329	0.06726	-0.108352	0.09538	-0.140529	0.0483	-0.130118	0.0908	-0.110008	0.1817	-0.119998	0.1705	-0.144334	0.1173
m(B6xCAST) cM	0.0104476	0.6107	0.00654294	0.7711	0.00282542	0.9074	0.0103596	0.69	0.0114526	0.6776	0.0125621	0.6653	0.0217275	0.5972	0.0348847	0.4888	0.0513948	0.3775	0.0788587	0.2255	0.05886	0.4101	0.0982065	0.2026	0.119423	0.1469	0.129936	0.1376	0.168342	0.06724
m(CASTxB6) cM	0.0251835	0.2198	0.0234083	0.2978	0.0267769	0.2701	0.0412975	0.1117	0.0374659	0.1737	0.0357557	0.2181	0.0504786	0.2193	0.0681952	0.1756	0.0840616	0.1484	0.117837	0.06958	0.111203	0.1188	0.147738	0.05453	0.153704	0.06127	0.168361	0.05364	0.19199	0.03646
female cM	-0.0418383	0.04143	-0.0449353	0.04558	-0.0502603	0.03837	-0.0515865	0.04686	-0.0598019	0.02981	-0.0698874	0.01599	-0.0780352	0.05733	-0.101666	0.04318	-0.1036	0.07464	-0.114847	0.07701	-0.139467	0.05004	-0.119989	0.1191	-0.112569	0.1717	-0.133062	0.1283	-0.133824	0.1468
male cM	0.0189014	0.3571	0.0160844	0.4744	0.0162732	0.5028	0.0277504	0.2852	0.0262952	0.3398	0.025673	0.3766	0.0382187	0.3524	0.0542945	0.2811	0.070833	0.2236	0.103539	0.1111	0.0893851	0.2105	0.129032	0.09355	0.141641	0.08487	0.154738	0.07646	0.186111	0.04271
average cM	-0.0087094	0.6713	-0.0125096	0.578	-0.0153863	0.5263	-0.00831676	0.7488	-0.0138589	0.6149	-0.0194889	0.5022	-0.0153864	0.7082	-0.0186082	0.712	-0.00798503	0.891	0.00424735	0.948	-0.0160502	0.8224	0.022623	0.7697	0.0289479	0.726	0.02513	0.7749	0.0525988	0.57
cross	50Kb	50Kb	60Kb	60Kb	70Kb	70Kb	80Kb	80Kb	90Kb	90Kb	100Kb	100Kb	200Kb	200Kb	300Kb	300Kb	400Kb	400Kb	500Kb	500Kb	600Kb	600Kb	700Kb	700Kb	800Kb	800Kb	900Kb	900Kb	1Mb	1Mb
f(B6xCAST) cM/Mb	-0.0388678	0.05819	-0.0418271	0.06277	-0.0453846	0.06152	-0.0461206	0.07561	-0.0517938	0.05994	-0.0610911	0.03526	-0.0671216	0.1022	-0.0927767	0.06513	-0.0917317	0.1147	-0.113348	0.08097	-0.126737	0.0752	-0.10045	0.1925	-0.109185	0.185	-0.138778	0.1125	-0.113756	0.218
f(CASTxB6) cM/Mb	-0.040612	0.04777	-0.0437072	0.05183	-0.0502011	0.0386	-0.0521499	0.0445	-0.0620652	0.02413	-0.072194	0.01281	-0.0818986	0.04602	-0.101543	0.04343	-0.106329	0.06727	-0.108352	0.09538	-0.140529	0.0483	-0.130118	0.0908	-0.110008	0.1817	-0.119998	0.1705	-0.144334	0.1173
m(B6xCAST) cM/Mb	0.0104477	0.6107	0.0065429	0.7711	0.00282547	0.9074	0.0103597	0.69	0.0114526	0.6776	0.0125621	0.6653	0.0217274	0.5972	0.0348846	0.4888	0.0513947	0.3775	0.0788588	0.2255	0.0588601	0.4101	0.0982066	0.2026	0.119423	0.1469	0.129936	0.1376	0.168342	0.06724
m(CASTxB6) cM/Mb	0.0251835	0.2198	0.0234083	0.2978	0.0267769	0.2701	0.0412975	0.1117	0.0374659	0.1737	0.0357557	0.2181	0.0504786	0.2193	0.0681953	0.1756	0.0840616	0.1484	0.117837	0.06958	0.111203	0.1188	0.147738	0.05453	0.153704	0.06127	0.168361	0.05364	0.19199	0.03646
female cM/Mb	-0.0418383	0.04143	-0.0449351	0.04558	-0.0502604	0.03837	-0.0515865	0.04686	-0.0598019	0.02981	-0.0698873	0.01599	-0.0780352	0.05733	-0.101666	0.04318	-0.1036	0.07464	-0.114847	0.07701	-0.139467	0.05004	-0.119989	0.1191	-0.112569	0.1717	-0.133062	0.1283	-0.133824	0.1468
male cM/Mb	0.0189013	0.3571	0.0160844	0.4744	0.0162732	0.5028	0.0277505	0.2852	0.0262952	0.3398	0.025673	0.3766	0.0382188	0.3524	0.0542945	0.2811	0.070833	0.2236	0.103539	0.1111	0.0893852	0.2105	0.129032	0.09355	0.141641	0.08487	0.154738	0.07646	0.186111	0.04271
average cM/Mb	-0.00870929	0.6713	-0.0125096	0.578	-0.0153862	0.5263	-0.00831684	0.7488	-0.0138589	0.6149	-0.019489	0.5022	-0.0153865	0.7082	-0.0186082	0.712	-0.00798497	0.891	0.00424726	0.948	-0.0160501	0.8224	0.0226231	0.7697	0.0289479	0.726	0.02513	0.7749	0.0525988	0.57
f(B6xCAST) cM		222		222		222		222		222		111111		0		222		0		222		222		0		0		0		0
f(CASTxB6) cM		111111		222		111111		111111		111111		111111		111111		111111		222		222		111111		222		0		0		0
m(B6xCAST) cM		0		0		0		0		0		0		0		0		0		0		0		0		0		0		222
m(CASTxB6) cM		0		0		0		0		0		0		0		0		0		222		0		222		222		222		111111
female cM		111111		111111		111111		111111		111111		111111		222		111111		222		222		222		0		0		0		0
male cM		0		0		0		0		0		0		0		0		0		0		0		222		222		222		111111
average cM		0		0		0		0		0		0		0		0		0		0		0		0		0		0		0

## Sheet: GC
cross	50Kb	50Kb	60Kb	60Kb	70Kb	70Kb	80Kb	80Kb	90Kb	90Kb	100Kb	100Kb	200Kb	200Kb	300Kb	300Kb	400Kb	400Kb	500Kb	500Kb	600Kb	600Kb	700Kb	700Kb	800Kb	800Kb	900Kb	900Kb	1Mb	1Mb
f(B6xCAST) cM	0.0473538	0.02101	0.0483322	0.03151	0.0510123	0.03556	0.051555	0.04699	0.0489134	0.07565	0.052114	0.07256	0.0598646	0.145	0.054487	0.2794	0.0657713	0.2585	0.0698678	0.283	0.0680382	0.3409	0.083268	0.2803	0.0741555	0.3688	0.0618747	0.4809	0.0913433	0.3232
f(CASTxB6) cM	0.0242966	0.2366	0.0214914	0.3392	0.0216554	0.3725	0.0232167	0.3713	0.0188767	0.4932	0.0227887	0.4326	0.0220956	0.591	0.00861356	0.8643	0.0138819	0.8117	0.0151906	0.8157	0.00512239	0.9429	0.014284	0.8533	0.0256315	0.7563	0.0148864	0.8655	0.0371597	0.6883
m(B6xCAST) cM	0.153441	5.551e-14	0.160948	5.838e-13	0.162062	1.848e-11	0.169722	4.621e-11	0.18183	2.823e-11	0.179911	4.222e-10	0.23004	1.42e-08	0.24431	8.605e-07	0.288061	4.398e-07	0.313898	7.71e-07	0.336856	1.219e-06	0.303835	5.627e-05	0.318388	7.584e-05	0.38896	4.043e-06	0.392248	1.025e-05
m(CASTxB6) cM	0.143951	1.81e-12	0.147954	3.695e-11	0.144791	2.053e-09	0.155578	1.67e-09	0.163214	2.457e-09	0.165595	9.395e-09	0.210363	2.289e-07	0.227306	4.901e-06	0.264923	3.669e-06	0.271497	2.172e-05	0.297281	2.108e-05	0.273711	0.0003043	0.286926	0.0003885	0.350204	3.848e-05	0.348053	0.000105
female cM	0.0371133	0.07055	0.0359875	0.1094	0.0373272	0.1242	0.0384311	0.1388	0.034934	0.2047	0.0386165	0.1835	0.0423654	0.3026	0.0324365	0.5198	0.040658	0.4852	0.0427549	0.5116	0.0366997	0.6077	0.0501428	0.5161	0.0498731	0.5458	0.0386818	0.6597	0.0652371	0.4809
male cM	0.153914	4.641e-14	0.159611	9.093e-13	0.158608	4.946e-11	0.168457	6.451e-11	0.178844	5.974e-11	0.178844	5.369e-10	0.228003	1.916e-08	0.243736	9.146e-07	0.286123	5.292e-07	0.302459	2.001e-06	0.326709	2.632e-06	0.297743	8.038e-05	0.31104	0.0001129	0.379979	6.995e-06	0.378867	2.149e-05
average cM	0.113337	3.054e-08	0.115375	2.635e-07	0.114294	2.339e-06	0.122535	2.181e-06	0.126712	3.876e-06	0.127654	1.018e-05	0.161051	8.059e-05	0.166877	0.000857	0.198797	0.0005689	0.206169	0.001382	0.224986	0.001439	0.216001	0.004669	0.21863	0.00739	0.257068	0.002924	0.273545	0.002611
cross	50Kb	50Kb	60Kb	60Kb	70Kb	70Kb	80Kb	80Kb	90Kb	90Kb	100Kb	100Kb	200Kb	200Kb	300Kb	300Kb	400Kb	400Kb	500Kb	500Kb	600Kb	600Kb	700Kb	700Kb	800Kb	800Kb	900Kb	900Kb	1Mb	1Mb
f(B6xCAST) cM/Mb	0.0473538	0.02101	0.0483321	0.03151	0.0510123	0.03556	0.051555	0.04699	0.0489134	0.07565	0.052114	0.07256	0.0598647	0.145	0.0544869	0.2794	0.0657713	0.2585	0.0698678	0.283	0.0680382	0.3409	0.0832679	0.2803	0.0741555	0.3688	0.0618747	0.4809	0.0913433	0.3232
f(CASTxB6) cM/Mb	0.0242967	0.2366	0.0214914	0.3392	0.0216555	0.3725	0.0232167	0.3713	0.0188768	0.4932	0.0227886	0.4326	0.0220956	0.591	0.00861355	0.8643	0.013882	0.8117	0.0151905	0.8157	0.00512241	0.9429	0.014284	0.8533	0.0256315	0.7563	0.0148864	0.8655	0.0371597	0.6883
m(B6xCAST) cM/Mb	0.153441	5.551e-14	0.160948	5.838e-13	0.162062	1.848e-11	0.169722	4.621e-11	0.18183	2.823e-11	0.179911	4.223e-10	0.23004	1.42e-08	0.24431	8.605e-07	0.288061	4.398e-07	0.313898	7.71e-07	0.336856	1.219e-06	0.303835	5.627e-05	0.318388	7.584e-05	0.38896	4.043e-06	0.392248	1.025e-05
m(CASTxB6) cM/Mb	0.143951	1.81e-12	0.147954	3.694e-11	0.144791	2.053e-09	0.155578	1.67e-09	0.163214	2.457e-09	0.165595	9.395e-09	0.210363	2.289e-07	0.227306	4.901e-06	0.264923	3.669e-06	0.271497	2.172e-05	0.297281	2.108e-05	0.273711	0.0003043	0.286926	0.0003885	0.350204	3.848e-05	0.348053	0.000105
female cM/Mb	0.0371133	0.07055	0.0359876	0.1094	0.0373272	0.1242	0.0384311	0.1388	0.0349339	0.2047	0.0386166	0.1835	0.0423655	0.3026	0.0324364	0.5198	0.040658	0.4852	0.0427548	0.5116	0.0366996	0.6077	0.0501429	0.5161	0.0498732	0.5458	0.0386818	0.6597	0.0652371	0.4809
male cM/Mb	0.153914	4.641e-14	0.159611	9.093e-13	0.158608	4.946e-11	0.168457	6.451e-11	0.178844	5.974e-11	0.178844	5.369e-10	0.228003	1.916e-08	0.243736	9.146e-07	0.286123	5.292e-07	0.302459	2.001e-06	0.326709	2.632e-06	0.297743	8.038e-05	0.31104	0.0001129	0.379979	6.995e-06	0.378867	2.149e-05
average cM/Mb	0.113337	3.054e-08	0.115375	2.635e-07	0.114294	2.339e-06	0.122535	2.181e-06	0.126712	3.876e-06	0.127654	1.018e-05	0.161051	8.059e-05	0.166877	0.000857	0.198797	0.0005689	0.206169	0.001382	0.224986	0.001439	0.216001	0.004669	0.21863	0.00739	0.257068	0.002924	0.273545	0.002611
f(B6xCAST) cM		111111		111111		111111		111111		222		222		0		0		0		0		0		0		0		0		0
f(CASTxB6) cM		0		0		0		0		0		0		0		0		0		0		0		0		0		0		0
m(B6xCAST) cM		111111		111111		111111		111111		111111		111111		111111		111111		111111		111111		111111		111111		111111		111111		111111
m(CASTxB6) cM		111111		111111		111111		111111		111111		111111		111111		111111		111111		111111		111111		111111		111111		111111		111111
female cM		222		0		0		0		0		0		0		0		0		0		0		0		0		0		0
male cM		111111		111111		111111		111111		111111		111111		111111		111111		111111		111111		111111		111111		111111		111111		111111
average cM		111111		111111		111111		111111		111111		111111		111111		111111		111111		111111		111111		111111		111111		111111		111111

## Sheet: DNA
cross	50Kb	50Kb	60Kb	60Kb	70Kb	70Kb	80Kb	80Kb	90Kb	90Kb	100Kb	100Kb	200Kb	200Kb	300Kb	300Kb	400Kb	400Kb	500Kb	500Kb	600Kb	600Kb	700Kb	700Kb	800Kb	800Kb	900Kb	900Kb	1Mb	1Mb
f(B6xCAST) cM	0.0604429	0.003205	0.0675899	0.00262	0.0600881	0.01327	0.0746321	0.004007	0.0972518	0.0004026	0.0892367	0.002079	0.12421	0.002424	0.165146	0.0009715	0.172714	0.002823	0.189511	0.003337	0.239686	0.0006713	0.191484	0.01237	0.24082	0.003091	0.232766	0.007235	0.188454	0.04012
f(CASTxB6) cM	0.0458814	0.02532	0.0509965	0.02325	0.047566	0.05003	0.0530505	0.04095	0.0749676	0.006431	0.0576348	0.04702	0.106233	0.00957	0.119282	0.01757	0.158813	0.006092	0.154718	0.01691	0.174619	0.01387	0.191335	0.01244	0.213958	0.00879	0.208918	0.01621	0.201545	0.02795
m(B6xCAST) cM	0.0678474	0.0009355	0.0782583	0.0004914	0.081698	0.0007526	0.0912187	0.0004323	0.10611	0.0001123	0.0928979	0.001348	0.134603	0.001007	0.167004	0.000849	0.177609	0.002123	0.196112	0.002373	0.205905	0.003611	0.120661	0.117	0.20297	0.01304	0.195028	0.02503	0.176817	0.0544
m(CASTxB6) cM	0.0489226	0.01709	0.0581489	0.009653	0.0580127	0.01681	0.0623084	0.01633	0.0718165	0.009051	0.0523714	0.07116	0.090631	0.02719	0.132488	0.008296	0.150697	0.009296	0.177497	0.006038	0.157854	0.02635	0.100776	0.191	0.18244	0.02595	0.156292	0.07352	0.155928	0.09038
female cM	0.0555468	0.006764	0.0618195	0.005929	0.0561245	0.02073	0.0662854	0.01062	0.0897432	0.001098	0.0761946	0.008607	0.12017	0.003354	0.148135	0.003128	0.17275	0.002817	0.177645	0.005995	0.214277	0.002435	0.198853	0.009333	0.232789	0.004277	0.227251	0.008781	0.201524	0.02797
male cM	0.0599961	0.003438	0.070003	0.001828	0.0716181	0.003149	0.0788397	0.002363	0.091419	0.0008834	0.0742998	0.01041	0.115729	0.004741	0.154136	0.002098	0.169623	0.003366	0.193341	0.002741	0.18671	0.008443	0.113863	0.1393	0.198028	0.01548	0.180087	0.0388	0.170263	0.06413
average cM	0.0642137	0.001738	0.073483	0.001067	0.0712928	0.003289	0.0811169	0.001757	0.100736	0.0002466	0.0831872	0.004115	0.130863	0.001391	0.170908	0.0006368	0.192656	0.0008454	0.20879	0.001196	0.228914	0.001179	0.1726	0.0244	0.244127	0.002696	0.233521	0.007043	0.20783	0.02333
cross	50Kb	50Kb	60Kb	60Kb	70Kb	70Kb	80Kb	80Kb	90Kb	90Kb	100Kb	100Kb	200Kb	200Kb	300Kb	300Kb	400Kb	400Kb	500Kb	500Kb	600Kb	600Kb	700Kb	700Kb	800Kb	800Kb	900Kb	900Kb	1Mb	1Mb
f(B6xCAST) cM/Mb	0.060443	0.003205	0.0675899	0.00262	0.0600881	0.01327	0.074632	0.004007	0.0972518	0.0004026	0.0892366	0.002079	0.124209	0.002424	0.165146	0.0009715	0.172714	0.002823	0.189511	0.003337	0.239686	0.0006713	0.191485	0.01237	0.24082	0.003091	0.232766	0.007235	0.188454	0.04012
f(CASTxB6) cM/Mb	0.0458815	0.02532	0.0509965	0.02325	0.0475662	0.05003	0.0530506	0.04095	0.0749675	0.006431	0.0576348	0.04702	0.106233	0.00957	0.119282	0.01757	0.158813	0.006092	0.154718	0.01691	0.174619	0.01387	0.191335	0.01244	0.213958	0.00879	0.208918	0.01621	0.201545	0.02795
m(B6xCAST) cM/Mb	0.0678474	0.0009355	0.0782583	0.0004914	0.0816981	0.0007526	0.0912187	0.0004323	0.10611	0.0001123	0.0928979	0.001348	0.134603	0.001007	0.167005	0.000849	0.177609	0.002123	0.196112	0.002373	0.205905	0.003611	0.120662	0.117	0.20297	0.01304	0.195028	0.02503	0.176817	0.0544
m(CASTxB6) cM/Mb	0.0489227	0.01709	0.0581488	0.009653	0.0580127	0.01681	0.0623084	0.01633	0.0718166	0.00905	0.0523714	0.07116	0.090631	0.02719	0.132488	0.008296	0.150697	0.009296	0.177497	0.006038	0.157854	0.02635	0.100776	0.191	0.18244	0.02595	0.156292	0.07352	0.155928	0.09038
female cM/Mb	0.0555468	0.006764	0.0618196	0.005929	0.0561245	0.02073	0.0662855	0.01062	0.0897433	0.001098	0.0761945	0.008607	0.12017	0.003354	0.148135	0.003128	0.17275	0.002817	0.177645	0.005995	0.214277	0.002435	0.198853	0.009333	0.232789	0.004277	0.227251	0.008781	0.201524	0.02797
male cM/Mb	0.0599961	0.003438	0.0700031	0.001828	0.0716182	0.003149	0.0788398	0.002363	0.0914191	0.0008834	0.0742998	0.01041	0.115729	0.004741	0.154137	0.002098	0.169623	0.003366	0.193341	0.002741	0.18671	0.008443	0.113863	0.1393	0.198028	0.01548	0.180087	0.0388	0.170263	0.06413
average cM/Mb	0.0642137	0.001738	0.0734828	0.001067	0.0712928	0.003289	0.0811169	0.001757	0.100736	0.0002466	0.0831872	0.004115	0.130863	0.001391	0.170908	0.0006368	0.192656	0.0008454	0.20879	0.001196	0.228914	0.001179	0.1726	0.0244	0.244127	0.002696	0.233522	0.007043	0.20783	0.02333
f(B6xCAST) cM		111111		111111		111111		111111		111111		111111		111111		111111		111111		111111		111111		111111		111111		111111		111111
f(CASTxB6) cM		111111		111111		222		111111		111111		111111		111111		111111		111111		111111		111111		111111		111111		111111		111111
m(B6xCAST) cM		111111		111111		111111		111111		111111		111111		111111		111111		111111		111111		111111		0		111111		111111		222
m(CASTxB6) cM		111111		111111		111111		111111		111111		222		111111		111111		111111		111111		111111		0		111111		222		222
female cM		111111		111111		111111		111111		111111		111111		111111		111111		111111		111111		111111		111111		111111		111111		111111
male cM		111111		111111		111111		111111		111111		111111		111111		111111		111111		111111		111111		0		111111		111111		222
average cM		111111		111111		111111		111111		111111		111111		111111		111111		111111		111111		111111		111111		111111		111111		111111

## Sheet: LINE
cross	50Kb	50Kb	60Kb	60Kb	70Kb	70Kb	80Kb	80Kb	90Kb	90Kb	100Kb	100Kb	200Kb	200Kb	300Kb	300Kb	400Kb	400Kb	500Kb	500Kb	600Kb	600Kb	700Kb	700Kb	800Kb	800Kb	900Kb	900Kb	1Mb	1Mb
f(B6xCAST) cM	-0.0781632	0.0001368	-0.0744695	0.0009125	-0.0843554	0.0005021	-0.0819388	0.001576	-0.0819292	0.002894	-0.0846328	0.003509	-0.0919336	0.02505	-0.10481	0.03708	-0.102014	0.07922	-0.0932704	0.1514	-0.0956244	0.1802	-0.0877208	0.2553	-0.100567	0.2223	-0.114232	0.1922	-0.0990355	0.2839
f(CASTxB6) cM	-0.067925	0.0009229	-0.0583613	0.00939	-0.062422	0.01009	-0.0624067	0.01616	-0.0654673	0.01737	-0.06579	0.02335	-0.0701591	0.08756	-0.0733168	0.1453	-0.0689835	0.2359	-0.0571096	0.3804	-0.0545801	0.445	-0.0479006	0.5351	-0.0768664	0.3515	-0.0840983	0.3377	-0.0590388	0.5236
m(B6xCAST) cM	-0.11804	7.883e-09	-0.119183	1.044e-07	-0.127493	1.355e-07	-0.137203	1.109e-07	-0.144637	1.308e-07	-0.142815	7.708e-07	-0.190433	2.949e-06	-0.207852	3.063e-05	-0.255741	8.074e-06	-0.265467	3.346e-05	-0.29387	2.645e-05	-0.277686	0.0002461	-0.306603	0.0001429	-0.35118	3.649e-05	-0.342539	0.0001372
m(CASTxB6) cM	-0.115237	1.771e-08	-0.113036	4.588e-07	-0.121362	5.281e-07	-0.12738	8.452e-07	-0.138103	4.731e-07	-0.137475	1.975e-06	-0.188652	3.66e-06	-0.205378	3.821e-05	-0.252745	1.038e-05	-0.238652	0.0002022	-0.269425	0.0001239	-0.248082	0.001107	-0.300212	0.0001993	-0.323917	0.0001514	-0.307846	0.0006596
female cM	-0.0765686	0.0001871	-0.0693122	0.002029	-0.0763989	0.00163	-0.0750711	0.003797	-0.0768695	0.005201	-0.0783016	0.006931	-0.0844289	0.03968	-0.0927426	0.06523	-0.088665	0.1274	-0.0771034	0.236	-0.0773215	0.2789	-0.070157	0.3633	-0.0904741	0.2725	-0.101699	0.2459	-0.0807999	0.3824
male cM	-0.120864	3.421e-09	-0.120108	8.3e-08	-0.128925	9.77e-08	-0.137064	1.143e-07	-0.146833	8.382e-08	-0.145248	4.964e-07	-0.196648	1.366e-06	-0.213897	1.764e-05	-0.263446	4.173e-06	-0.26081	4.639e-05	-0.290501	3.3e-05	-0.270965	0.0003516	-0.312466	0.0001046	-0.347253	4.516e-05	-0.333004	0.0002152
average cM	-0.112129	4.252e-08	-0.10781	1.523e-06	-0.115991	1.649e-06	-0.121255	2.786e-06	-0.128141	3.006e-06	-0.127205	1.094e-05	-0.162744	6.758e-05	-0.179375	0.000334	-0.208822	0.0002905	-0.19839	0.002104	-0.223248	0.00157	-0.208858	0.00627	-0.240705	0.003106	-0.270398	0.001714	-0.251998	0.005697
cross	50Kb	50Kb	60Kb	60Kb	70Kb	70Kb	80Kb	80Kb	90Kb	90Kb	100Kb	100Kb	200Kb	200Kb	300Kb	300Kb	400Kb	400Kb	500Kb	500Kb	600Kb	600Kb	700Kb	700Kb	800Kb	800Kb	900Kb	900Kb	1Mb	1Mb
f(B6xCAST) cM/Mb	-0.0781632	0.0001368	-0.0744695	0.0009125	-0.0843554	0.0005021	-0.0819388	0.001576	-0.0819293	0.002894	-0.0846328	0.003509	-0.0919336	0.02505	-0.10481	0.03708	-0.102014	0.07922	-0.0932704	0.1514	-0.0956244	0.1802	-0.0877207	0.2553	-0.100567	0.2223	-0.114232	0.1922	-0.0990355	0.2839
f(CASTxB6) cM/Mb	-0.067925	0.0009229	-0.0583614	0.00939	-0.0624222	0.01009	-0.0624067	0.01616	-0.0654674	0.01737	-0.0657899	0.02335	-0.070159	0.08756	-0.0733167	0.1453	-0.0689835	0.2359	-0.0571095	0.3804	-0.0545801	0.445	-0.0479007	0.5351	-0.0768664	0.3515	-0.0840983	0.3377	-0.0590388	0.5236
m(B6xCAST) cM/Mb	-0.11804	7.883e-09	-0.119183	1.044e-07	-0.127493	1.355e-07	-0.137203	1.109e-07	-0.144637	1.308e-07	-0.142815	7.708e-07	-0.190433	2.949e-06	-0.207852	3.063e-05	-0.255741	8.074e-06	-0.265467	3.346e-05	-0.29387	2.645e-05	-0.277686	0.0002461	-0.306603	0.0001429	-0.35118	3.649e-05	-0.342539	0.0001372
m(CASTxB6) cM/Mb	-0.115237	1.771e-08	-0.113036	4.588e-07	-0.121362	5.281e-07	-0.12738	8.452e-07	-0.138103	4.731e-07	-0.137475	1.975e-06	-0.188652	3.66e-06	-0.205378	3.821e-05	-0.252745	1.038e-05	-0.238652	0.0002022	-0.269425	0.0001239	-0.248082	0.001107	-0.300212	0.0001993	-0.323917	0.0001514	-0.307846	0.0006596
female cM/Mb	-0.0765685	0.0001871	-0.0693124	0.002029	-0.076399	0.00163	-0.0750712	0.003797	-0.0768695	0.005201	-0.0783016	0.00693	-0.0844289	0.03968	-0.0927426	0.06523	-0.088665	0.1274	-0.0771033	0.236	-0.0773214	0.2789	-0.070157	0.3633	-0.0904742	0.2725	-0.101699	0.2459	-0.0807999	0.3824
male cM/Mb	-0.120864	3.421e-09	-0.120108	8.3e-08	-0.128925	9.77e-08	-0.137064	1.143e-07	-0.146833	8.382e-08	-0.145248	4.964e-07	-0.196648	1.366e-06	-0.213897	1.764e-05	-0.263446	4.173e-06	-0.26081	4.639e-05	-0.290501	3.3e-05	-0.270965	0.0003516	-0.312466	0.0001046	-0.347253	4.516e-05	-0.333004	0.0002152
average cM/Mb	-0.112129	4.252e-08	-0.10781	1.523e-06	-0.115991	1.649e-06	-0.121255	2.786e-06	-0.128141	3.006e-06	-0.127204	1.094e-05	-0.162744	6.758e-05	-0.179375	0.000334	-0.208822	0.0002905	-0.19839	0.002104	-0.223248	0.00157	-0.208858	0.00627	-0.240705	0.003106	-0.270398	0.001714	-0.251998	0.005697
f(B6xCAST) cM		111111		111111		111111		111111		111111		111111		111111		111111		222		0		0		0		0		0		0
f(CASTxB6) cM		111111		111111		111111		111111		111111		111111		222		0		0		0		0		0		0		0		0
m(B6xCAST) cM		111111		111111		111111		111111		111111		111111		111111		111111		111111		111111		111111		111111		111111		111111		111111
m(CASTxB6) cM		111111		111111		111111		111111		111111		111111		111111		111111		111111		111111		111111		111111		111111		111111		111111
female cM		111111		111111		111111		111111		111111		111111		111111		222		0		0		0		0		0		0		0
male cM		111111		111111		111111		111111		111111		111111		111111		111111		111111		111111		111111		111111		111111		111111		111111
average cM		111111		111111		111111		111111		111111		111111		111111		111111		111111		111111		111111		111111		111111		111111		111111

## Sheet: low complexity
cross	50Kb	50Kb	60Kb	60Kb	70Kb	70Kb	80Kb	80Kb	90Kb	90Kb	100Kb	100Kb	200Kb	200Kb	300Kb	300Kb	400Kb	400Kb	500Kb	500Kb	600Kb	600Kb	700Kb	700Kb	800Kb	800Kb	900Kb	900Kb	1Mb	1Mb
f(B6xCAST) cM	0.0132178	0.5196	0.00550418	0.8066	-0.00579581	0.8114	-0.00507865	0.845	0.0213489	0.4383	0.0334122	0.2498	0.0133885	0.7447	0.0607329	0.2279	0.0734254	0.207	0.141511	0.02906	0.111722	0.1171	0.148976	0.05251	0.193939	0.01779	0.159928	0.06699	0.178194	0.05251
f(CASTxB6) cM	0.0266461	0.1942	0.0214486	0.3401	0.0228147	0.3474	0.0224418	0.3875	0.0364067	0.1862	0.0354106	0.2226	0.0321578	0.434	0.0915692	0.06872	0.132235	0.02265	0.138333	0.03291	0.155943	0.02825	0.204548	0.007459	0.224964	0.005809	0.189169	0.02983	0.163864	0.07496
m(B6xCAST) cM	0.0141421	0.4908	0.0149596	0.5059	-0.0158243	0.5146	-0.0052115	0.841	0.0194855	0.4794	0.0304353	0.2946	0.071064	0.08354	0.0696189	0.1668	0.139752	0.01595	0.101537	0.1182	0.139508	0.04997	0.169614	0.02702	0.214041	0.008763	0.164661	0.0592	0.203086	0.02675
m(CASTxB6) cM	0.0231387	0.2596	0.026643	0.236	0.000212017	0.993	0.00986916	0.704	0.0313321	0.2553	0.0450652	0.1206	0.0597517	0.1458	0.0611326	0.2248	0.131348	0.02358	0.0923676	0.1555	0.113075	0.1127	0.132212	0.08567	0.236505	0.003685	0.165021	0.05864	0.201503	0.02798
female cM	0.0212743	0.2999	0.0145163	0.5186	0.00968253	0.6901	0.00976157	0.707	0.0304985	0.2682	0.0359969	0.215	0.0240004	0.5594	0.0799123	0.1123	0.108296	0.06233	0.145	0.02529	0.140329	0.04862	0.184036	0.01629	0.21598	0.008158	0.180478	0.03837	0.176173	0.0553
male cM	0.019589	0.3399	0.0219453	0.3291	-0.00749792	0.7575	0.00287219	0.912	0.0268166	0.3303	0.0395443	0.1732	0.0675827	0.09986	0.0674618	0.1803	0.140319	0.01552	0.100364	0.1226	0.12983	0.0683	0.154818	0.04381	0.232711	0.00429	0.16995	0.05139	0.207929	0.02326
average cM	0.0224964	0.273	0.0206188	0.3591	0.000334839	0.989	0.00657065	0.8003	0.0316378	0.2507	0.0419906	0.1481	0.0534338	0.1934	0.082526	0.101	0.141957	0.01434	0.135423	0.03681	0.154677	0.02957	0.191435	0.01239	0.25683	0.001568	0.20221	0.02006	0.21933	0.01655
cross	50Kb	50Kb	60Kb	60Kb	70Kb	70Kb	80Kb	80Kb	90Kb	90Kb	100Kb	100Kb	200Kb	200Kb	300Kb	300Kb	400Kb	400Kb	500Kb	500Kb	600Kb	600Kb	700Kb	700Kb	800Kb	800Kb	900Kb	900Kb	1Mb	1Mb
f(B6xCAST) cM/Mb	0.0132177	0.5196	0.00550418	0.8066	-0.00579582	0.8114	-0.00507863	0.845	0.0213489	0.4383	0.0334122	0.2498	0.0133885	0.7447	0.060733	0.2279	0.0734255	0.207	0.141511	0.02906	0.111722	0.1171	0.148976	0.05251	0.193939	0.01779	0.159928	0.06699	0.178194	0.05251
f(CASTxB6) cM/Mb	0.0266461	0.1942	0.0214485	0.3401	0.0228148	0.3474	0.0224418	0.3875	0.0364067	0.1862	0.0354105	0.2226	0.0321578	0.434	0.0915692	0.06872	0.132235	0.02265	0.138333	0.03291	0.155943	0.02825	0.204547	0.007459	0.224965	0.005809	0.189169	0.02983	0.163864	0.07496
m(B6xCAST) cM/Mb	0.014142	0.4908	0.0149596	0.5059	-0.0158243	0.5146	-0.00521151	0.841	0.0194855	0.4794	0.0304353	0.2946	0.071064	0.08354	0.0696189	0.1668	0.139752	0.01595	0.101537	0.1182	0.139507	0.04997	0.169614	0.02702	0.214041	0.008763	0.164661	0.0592	0.203086	0.02675
m(CASTxB6) cM/Mb	0.0231388	0.2596	0.026643	0.236	0.000211995	0.993	0.00986915	0.704	0.0313321	0.2553	0.0450653	0.1206	0.0597518	0.1458	0.0611326	0.2248	0.131348	0.02358	0.0923676	0.1555	0.113075	0.1127	0.132212	0.08567	0.236505	0.003685	0.165021	0.05864	0.201503	0.02798
female cM/Mb	0.0212742	0.2999	0.0145162	0.5186	0.00968266	0.6901	0.00976169	0.707	0.0304986	0.2682	0.035997	0.215	0.0240004	0.5594	0.0799122	0.1123	0.108296	0.06233	0.145	0.02529	0.140329	0.04862	0.184036	0.01629	0.21598	0.008158	0.180478	0.03837	0.176173	0.0553
male cM/Mb	0.019589	0.3399	0.0219452	0.3291	-0.00749789	0.7575	0.00287219	0.912	0.0268166	0.3303	0.0395444	0.1732	0.0675827	0.09986	0.0674618	0.1803	0.140319	0.01552	0.100364	0.1226	0.12983	0.0683	0.154818	0.04381	0.232711	0.00429	0.16995	0.05139	0.207929	0.02326
average cM/Mb	0.0224965	0.273	0.0206188	0.3591	0.000334899	0.989	0.0065707	0.8003	0.0316377	0.2507	0.0419906	0.1481	0.0534338	0.1934	0.082526	0.101	0.141957	0.01434	0.135423	0.03681	0.154677	0.02957	0.191435	0.01239	0.25683	0.001568	0.20221	0.02006	0.21933	0.01655
f(B6xCAST) cM		0		0		0		0		0		0		0		0		0		111111		0		222		111111		222		222
f(CASTxB6) cM		0		0		0		0		0		0		0		222		111111		111111		111111		111111		111111		111111		222
m(B6xCAST) cM		0		0		0		0		0		0		222		0		111111		0		111111		111111		111111		222		111111
m(CASTxB6) cM		0		0		0		0		0		0		0		0		111111		0		0		222		111111		222		111111
female cM		0		0		0		0		0		0		0		0		222		111111		111111		111111		111111		111111		222
male cM		0		0		0		0		0		0		222		0		111111		0		222		111111		111111		222		111111
average cM		0		0		0		0		0		0		0		0		111111		111111		111111		111111		111111		111111		111111

## Sheet: LTR
cross	50Kb	50Kb	60Kb	60Kb	70Kb	70Kb	80Kb	80Kb	90Kb	90Kb	100Kb	100Kb	200Kb	200Kb	300Kb	300Kb	400Kb	400Kb	500Kb	500Kb	600Kb	600Kb	700Kb	700Kb	800Kb	800Kb	900Kb	900Kb	1Mb	1Mb
f(B6xCAST) cM	-0.0577978	0.00483	-0.0546552	0.015	-0.0590225	0.015	-0.0743898	0.004128	-0.0735057	0.007547	-0.0778895	0.007233	-0.103615	0.01151	-0.13044	0.00936	-0.145813	0.01188	-0.140893	0.02978	-0.143631	0.04351	-0.154703	0.04397	-0.141702	0.08474	-0.161528	0.06426	-0.190631	0.03783
f(CASTxB6) cM	-0.0477904	0.01983	-0.0424129	0.05917	-0.0458598	0.05885	-0.0563595	0.02987	-0.0522126	0.0579	-0.0605875	0.0368	-0.0919888	0.02496	-0.0931208	0.06413	-0.113943	0.04979	-0.106129	0.1024	-0.103734	0.1458	-0.10764	0.1624	-0.0907766	0.2709	-0.103969	0.2355	-0.141612	0.1245
m(B6xCAST) cM	-0.0299882	0.1439	-0.0209174	0.3522	-0.0157898	0.5156	-0.0258765	0.319	-0.0101234	0.7133	-0.0220135	0.4484	-0.0216763	0.598	-0.0388497	0.4407	-0.0442348	0.4476	-0.0688426	0.2902	-0.0373614	0.6013	-0.00517854	0.9466	-0.0324244	0.6946	-0.0325832	0.7107	-0.0591663	0.5227
m(CASTxB6) cM	-0.0373437	0.06876	-0.0324319	0.1491	-0.0273358	0.2603	-0.0472191	0.0689	-0.0307033	0.265	-0.0389472	0.1798	-0.0550537	0.1803	-0.0812672	0.1064	-0.0819959	0.1587	-0.0929826	0.1527	-0.0687716	0.3357	-0.0326617	0.6724	-0.0968866	0.2398	-0.0799032	0.3624	-0.104892	0.2563
female cM	-0.0552779	0.007036	-0.0506385	0.02424	-0.0546555	0.02431	-0.067986	0.008775	-0.0654284	0.01743	-0.0720769	0.01296	-0.102052	0.01283	-0.116409	0.0205	-0.134982	0.01996	-0.127242	0.04992	-0.127923	0.07249	-0.135879	0.07727	-0.117918	0.1521	-0.13576	0.1206	-0.170461	0.06381
male cM	-0.035126	0.08693	-0.0280309	0.2125	-0.022822	0.3473	-0.0385909	0.1372	-0.0219116	0.4264	-0.0320674	0.2694	-0.0406873	0.3222	-0.0633628	0.2083	-0.0661502	0.2558	-0.0849064	0.1918	-0.0557448	0.4354	-0.0205724	0.79	-0.0683342	0.4076	-0.059209	0.5001	-0.0860711	0.352
average cM	-0.0486938	0.01761	-0.0422894	0.05992	-0.0411497	0.09005	-0.0571956	0.02752	-0.0461175	0.09397	-0.0555502	0.0556	-0.0757794	0.06494	-0.098695	0.04969	-0.109157	0.06026	-0.116909	0.07182	-0.101539	0.1546	-0.0812482	0.2922	-0.103862	0.2075	-0.109411	0.2117	-0.138876	0.132
cross	50Kb	50Kb	60Kb	60Kb	70Kb	70Kb	80Kb	80Kb	90Kb	90Kb	100Kb	100Kb	200Kb	200Kb	300Kb	300Kb	400Kb	400Kb	500Kb	500Kb	600Kb	600Kb	700Kb	700Kb	800Kb	800Kb	900Kb	900Kb	1Mb	1Mb
f(B6xCAST) cM/Mb	-0.0577978	0.00483	-0.0546552	0.015	-0.0590226	0.015	-0.0743897	0.004128	-0.0735057	0.007547	-0.0778894	0.007233	-0.103615	0.01151	-0.13044	0.00936	-0.145813	0.01188	-0.140893	0.02978	-0.143631	0.04351	-0.154703	0.04397	-0.141702	0.08474	-0.161528	0.06426	-0.190631	0.03783
f(CASTxB6) cM/Mb	-0.0477904	0.01983	-0.042413	0.05917	-0.0458599	0.05885	-0.0563595	0.02987	-0.0522126	0.0579	-0.0605875	0.0368	-0.0919887	0.02496	-0.0931208	0.06413	-0.113943	0.04979	-0.106129	0.1024	-0.103734	0.1458	-0.10764	0.1624	-0.0907766	0.2709	-0.103969	0.2355	-0.141612	0.1245
m(B6xCAST) cM/Mb	-0.0299883	0.1439	-0.0209174	0.3522	-0.0157898	0.5156	-0.0258765	0.319	-0.0101234	0.7133	-0.0220135	0.4484	-0.0216762	0.598	-0.0388497	0.4407	-0.0442348	0.4476	-0.0688425	0.2902	-0.0373614	0.6013	-0.00517854	0.9466	-0.0324244	0.6946	-0.0325832	0.7107	-0.0591663	0.5227
m(CASTxB6) cM/Mb	-0.0373437	0.06876	-0.032432	0.1491	-0.0273358	0.2602	-0.0472191	0.0689	-0.0307034	0.265	-0.0389473	0.1798	-0.0550537	0.1803	-0.0812672	0.1064	-0.081996	0.1587	-0.0929826	0.1527	-0.0687716	0.3357	-0.0326617	0.6724	-0.0968867	0.2398	-0.0799032	0.3624	-0.104892	0.2563
female cM/Mb	-0.0552778	0.007036	-0.0506386	0.02424	-0.0546555	0.02431	-0.0679861	0.008774	-0.0654284	0.01743	-0.0720769	0.01296	-0.102052	0.01283	-0.116409	0.0205	-0.134982	0.01996	-0.127242	0.04992	-0.127923	0.07249	-0.135879	0.07727	-0.117918	0.1521	-0.13576	0.1206	-0.170461	0.06381
male cM/Mb	-0.035126	0.08693	-0.0280309	0.2125	-0.022822	0.3473	-0.0385908	0.1372	-0.0219116	0.4264	-0.0320675	0.2694	-0.0406872	0.3222	-0.0633629	0.2083	-0.0661502	0.2558	-0.0849064	0.1918	-0.0557447	0.4354	-0.0205724	0.79	-0.0683342	0.4076	-0.059209	0.5001	-0.0860711	0.352
average cM/Mb	-0.0486938	0.01761	-0.0422895	0.05992	-0.0411497	0.09005	-0.0571956	0.02752	-0.0461176	0.09397	-0.0555502	0.0556	-0.0757794	0.06494	-0.098695	0.04969	-0.109157	0.06026	-0.116909	0.07182	-0.101539	0.1546	-0.0812483	0.2922	-0.103862	0.2075	-0.109411	0.2117	-0.138876	0.132
f(B6xCAST) cM		111111		111111		111111		111111		111111		111111		111111		111111		111111		111111		111111		111111		222		222		111111
f(CASTxB6) cM		111111		222		222		111111		222		111111		111111		222		111111		0		0		0		0		0		0
m(B6xCAST) cM		0		0		0		0		0		0		0		0		0		0		0		0		0		0		0
m(CASTxB6) cM		222		0		0		222		0		0		0		0		0		0		0		0		0		0		0
female cM		111111		111111		111111		111111		111111		111111		111111		111111		111111		111111		222		222		0		0		222
male cM		222		0		0		0		0		0		0		0		0		0		0		0		0		0		0
average cM		111111		222		222		111111		222		222		222		111111		222		222		0		0		0		0		0

## Sheet: other
cross	50Kb	50Kb	60Kb	60Kb	70Kb	70Kb	80Kb	80Kb	90Kb	90Kb	100Kb	100Kb	200Kb	200Kb	300Kb	300Kb	400Kb	400Kb	500Kb	500Kb	600Kb	600Kb	700Kb	700Kb	800Kb	800Kb	900Kb	900Kb	1Mb	1Mb
f(B6xCAST) cM	-0.0215123	0.2946	-0.0261195	0.2454	-0.019996	0.4103	-0.0362776	0.1623	-0.0234168	0.3953	-0.0266669	0.3584	-0.0310658	0.4498	-0.0676011	0.1794	-0.00944642	0.8712	-0.066729	0.3053	-0.0916786	0.1989	-0.0586512	0.4474	-0.0212518	0.797	0.019439	0.8249	-0.108023	0.2422
f(CASTxB6) cM	-0.0345117	0.0926	-0.0416388	0.06396	-0.0253056	0.2973	-0.0417575	0.1077	-0.0355377	0.1969	-0.0263851	0.3635	-0.026973	0.5117	-0.0410962	0.4147	-0.0200859	0.7303	-0.0746036	0.2516	-0.0815368	0.2535	-0.0156137	0.8398	-0.025753	0.7552	-0.0451623	0.6071	-0.13326	0.1485
m(B6xCAST) cM	-0.00425663	0.8357	-0.0056586	0.8013	0.0197842	0.4152	0.0100439	0.699	0.0110365	0.6887	0.0191247	0.5102	-0.00409817	0.9206	-0.0379825	0.451	-0.0217843	0.7085	-0.103626	0.1108	-0.0545993	0.4449	-0.034154	0.6584	-0.0748682	0.3642	-0.143272	0.1012	-0.172888	0.06007
m(CASTxB6) cM	-0.0264512	0.1974	-0.0279398	0.214	-0.00436815	0.8573	-0.00935306	0.7187	-0.0229959	0.4038	-0.0132296	0.6487	-0.0518347	0.2071	-0.0714305	0.156	-0.0625327	0.2827	-0.129215	0.04645	-0.0875947	0.2198	-0.0475459	0.5381	-0.125703	0.1266	-0.152123	0.08163	-0.192368	0.03609
female cM	-0.0297581	0.147	-0.0359119	0.1102	-0.0238837	0.3253	-0.0409601	0.1146	-0.0310726	0.2593	-0.0277051	0.34	-0.0302414	0.4619	-0.0564543	0.2624	-0.0155426	0.7897	-0.0734361	0.2591	-0.0899082	0.2078	-0.038107	0.6218	-0.0241902	0.7696	-0.0144091	0.8697	-0.124935	0.1758
male cM	-0.0165626	0.4197	-0.018153	0.4195	0.00708861	0.7704	-0.000223426	0.9931	-0.00733137	0.7902	0.00221499	0.9392	-0.0302655	0.4616	-0.057573	0.253	-0.044484	0.445	-0.12183	0.06057	-0.0744253	0.2974	-0.0427536	0.5799	-0.10469	0.2039	-0.152499	0.08087	-0.188509	0.04006
average cM	-0.0247615	0.2276	-0.0289367	0.1981	-0.00769995	0.7512	-0.0202949	0.4345	-0.0200238	0.4673	-0.0125476	0.6657	-0.0336333	0.4132	-0.064413	0.2009	-0.0355478	0.5417	-0.111841	0.08512	-0.0935815	0.1897	-0.0464967	0.5471	-0.077451	0.3478	-0.102574	0.2419	-0.181696	0.04797
cross	50Kb	50Kb	60Kb	60Kb	70Kb	70Kb	80Kb	80Kb	90Kb	90Kb	100Kb	100Kb	200Kb	200Kb	300Kb	300Kb	400Kb	400Kb	500Kb	500Kb	600Kb	600Kb	700Kb	700Kb	800Kb	800Kb	900Kb	900Kb	1Mb	1Mb
f(B6xCAST) cM/Mb	-0.0215124	0.2946	-0.0261195	0.2454	-0.019996	0.4103	-0.0362776	0.1623	-0.0234169	0.3953	-0.0266668	0.3584	-0.0310658	0.4498	-0.0676011	0.1794	-0.00944649	0.8712	-0.066729	0.3053	-0.0916786	0.1989	-0.0586512	0.4474	-0.0212518	0.797	0.0194389	0.8249	-0.108023	0.2422
f(CASTxB6) cM/Mb	-0.0345117	0.0926	-0.0416388	0.06396	-0.0253056	0.2973	-0.0417575	0.1077	-0.0355377	0.1969	-0.0263851	0.3635	-0.026973	0.5117	-0.0410961	0.4148	-0.0200858	0.7303	-0.0746036	0.2516	-0.0815368	0.2535	-0.0156137	0.8398	-0.025753	0.7552	-0.0451623	0.6071	-0.13326	0.1485
m(B6xCAST) cM/Mb	-0.00425667	0.8357	-0.00565853	0.8013	0.0197842	0.4152	0.0100439	0.699	0.0110365	0.6887	0.0191247	0.5102	-0.00409812	0.9206	-0.0379825	0.451	-0.0217843	0.7085	-0.103626	0.1108	-0.0545992	0.4449	-0.034154	0.6584	-0.0748682	0.3642	-0.143272	0.1012	-0.172888	0.06007
m(CASTxB6) cM/Mb	-0.0264511	0.1974	-0.0279399	0.214	-0.0043682	0.8573	-0.00935305	0.7187	-0.0229959	0.4038	-0.0132297	0.6487	-0.0518348	0.2071	-0.0714305	0.156	-0.0625327	0.2827	-0.129215	0.04645	-0.0875947	0.2198	-0.0475459	0.5381	-0.125703	0.1266	-0.152123	0.08163	-0.192368	0.03609
female cM/Mb	-0.029758	0.147	-0.0359119	0.1102	-0.0238838	0.3253	-0.0409601	0.1146	-0.0310726	0.2593	-0.0277051	0.34	-0.0302414	0.4619	-0.0564544	0.2624	-0.0155426	0.7897	-0.0734361	0.2591	-0.0899082	0.2078	-0.038107	0.6218	-0.0241902	0.7696	-0.0144091	0.8697	-0.124935	0.1758
male cM/Mb	-0.0165626	0.4197	-0.018153	0.4195	0.00708858	0.7704	-0.000223441	0.9931	-0.00733145	0.7901	0.00221496	0.9392	-0.0302655	0.4616	-0.0575731	0.253	-0.044484	0.445	-0.12183	0.06057	-0.0744253	0.2974	-0.0427535	0.5799	-0.10469	0.2039	-0.152499	0.08087	-0.188509	0.04006
average cM/Mb	-0.0247614	0.2276	-0.0289367	0.1981	-0.00769992	0.7512	-0.0202948	0.4345	-0.0200238	0.4673	-0.0125474	0.6657	-0.0336333	0.4132	-0.064413	0.2009	-0.0355478	0.5417	-0.111841	0.08512	-0.0935814	0.1897	-0.0464966	0.5471	-0.0774511	0.3478	-0.102574	0.2419	-0.181696	0.04797
f(B6xCAST) cM		0		0		0		0		0		0		0		0		0		0		0		0		0		0		0
f(CASTxB6) cM		222		222		0		0		0		0		0		0		0		0		0		0		0		0		0
m(B6xCAST) cM		0		0		0		0		0		0		0		0		0		0		0		0		0		0		222
m(CASTxB6) cM		0		0		0		0		0		0		0		0		0		111111		0		0		0		222		111111
female cM		0		0		0		0		0		0		0		0		0		0		0		0		0		0		0
male cM		0		0		0		0		0		0		0		0		0		222		0		0		0		222		111111
average cM		0		0		0		0		0		0		0		0		0		222		0		0		0		0		111111

## Sheet: RNA
cross	50Kb	50Kb	60Kb	60Kb	70Kb	70Kb	80Kb	80Kb	90Kb	90Kb	100Kb	100Kb	200Kb	200Kb	300Kb	300Kb	400Kb	400Kb	500Kb	500Kb	600Kb	600Kb	700Kb	700Kb	800Kb	800Kb	900Kb	900Kb	1Mb	1Mb
f(B6xCAST) cM	0.0256134	0.212	0.0424096	0.05919	0.017662	0.467	0.0501156	0.0535	0.0299809	0.2764	0.0369872	0.2027	0.044773	0.276	0.00285345	0.9549	0.0261499	0.6536	0.0224442	0.7305	0.0274765	0.7008	0.0255877	0.7405	0.012346	0.8812	0.0141427	0.8721	-0.0307816	0.7396
f(CASTxB6) cM	0.0240405	0.2414	0.0273337	0.2241	0.013367	0.582	0.04383	0.09133	0.0474424	0.08489	0.0330727	0.2547	-0.00188159	0.9635	-0.00729305	0.885	-0.0306549	0.5988	-0.0233401	0.7202	-0.0141959	0.8427	-0.0684083	0.3754	0.0282561	0.7323	-0.00373544	0.966	-0.0976108	0.2909
m(B6xCAST) cM	0.00250579	0.9028	0.0062861	0.7798	0.00956314	0.6937	0.0262515	0.312	0.0237067	0.3895	0.0152494	0.5995	0.0419651	0.3072	0.0222859	0.6584	0.0374552	0.5202	0.0291745	0.6543	0.10055	0.1587	0.0894356	0.2461	0.0993303	0.2281	0.152652	0.08056	0.0419681	0.6504
m(CASTxB6) cM	0.00976538	0.6342	0.0261088	0.2455	0.018335	0.4502	0.0314663	0.2256	0.024123	0.3812	0.0143503	0.6212	0.054419	0.1853	0.0524164	0.2981	0.0795766	0.1714	0.0742486	0.2539	0.127082	0.0744	0.086747	0.2607	0.0958234	0.245	0.130196	0.1368	0.0589115	0.5245
female cM	0.0260662	0.204	0.0362251	0.1071	0.0161554	0.5059	0.049009	0.05901	0.0408545	0.1379	0.036551	0.2081	0.0218333	0.5954	-0.00244946	0.9612	-0.00335907	0.954	-0.00162242	0.9801	0.00595905	0.9336	-0.0230463	0.7655	0.0212904	0.7966	0.00499538	0.9547	-0.0676433	0.4648
male cM	0.00657213	0.7488	0.0174468	0.4378	0.014811	0.5419	0.0301213	0.246	0.0248898	0.3662	0.015331	0.5976	0.0503362	0.2206	0.0395062	0.433	0.0614594	0.2911	0.0553175	0.3956	0.118411	0.09662	0.0910631	0.2376	0.100458	0.2228	0.145214	0.09665	0.0525038	0.5707
average cM	0.0167792	0.4136	0.028661	0.2024	0.0170237	0.4833	0.0426467	0.1004	0.035642	0.1956	0.0276065	0.3418	0.0417681	0.3095	0.0231005	0.6467	0.0366167	0.5296	0.0328699	0.6139	0.0777317	0.2764	0.0468379	0.5442	0.0733172	0.3742	0.0930099	0.2888	0.000102509	0.9991
cross	50Kb	50Kb	60Kb	60Kb	70Kb	70Kb	80Kb	80Kb	90Kb	90Kb	100Kb	100Kb	200Kb	200Kb	300Kb	300Kb	400Kb	400Kb	500Kb	500Kb	600Kb	600Kb	700Kb	700Kb	800Kb	800Kb	900Kb	900Kb	1Mb	1Mb
f(B6xCAST) cM/Mb	0.0256134	0.212	0.0424096	0.05919	0.017662	0.467	0.0501156	0.0535	0.029981	0.2764	0.0369872	0.2027	0.0447729	0.276	0.00285341	0.9549	0.0261499	0.6536	0.0224442	0.7305	0.0274765	0.7008	0.0255877	0.7405	0.0123461	0.8812	0.0141428	0.8721	-0.0307816	0.7396
f(CASTxB6) cM/Mb	0.0240404	0.2414	0.0273337	0.2241	0.013367	0.582	0.04383	0.09133	0.0474424	0.08489	0.0330728	0.2547	-0.0018816	0.9635	-0.00729311	0.885	-0.0306548	0.5988	-0.0233402	0.7202	-0.0141959	0.8427	-0.0684082	0.3754	0.0282561	0.7323	-0.00373549	0.966	-0.0976108	0.2909
m(B6xCAST) cM/Mb	0.00250582	0.9028	0.00628609	0.7798	0.00956313	0.6937	0.0262515	0.312	0.0237067	0.3895	0.0152494	0.5995	0.041965	0.3072	0.0222858	0.6584	0.0374551	0.5202	0.0291745	0.6543	0.10055	0.1587	0.0894355	0.2461	0.0993303	0.2281	0.152652	0.08056	0.0419681	0.6504
m(CASTxB6) cM/Mb	0.00976537	0.6342	0.0261088	0.2455	0.018335	0.4502	0.0314663	0.2256	0.024123	0.3812	0.0143503	0.6212	0.054419	0.1853	0.0524164	0.2981	0.0795766	0.1714	0.0742486	0.2539	0.127082	0.0744	0.0867469	0.2607	0.0958234	0.245	0.130196	0.1368	0.0589115	0.5245
female cM/Mb	0.0260662	0.204	0.0362252	0.1071	0.0161555	0.5059	0.049009	0.05901	0.0408545	0.1379	0.036551	0.2081	0.0218333	0.5954	-0.00244942	0.9612	-0.00335902	0.954	-0.00162245	0.9801	0.00595899	0.9336	-0.0230462	0.7655	0.0212904	0.7966	0.00499541	0.9547	-0.0676433	0.4648
male cM/Mb	0.00657221	0.7488	0.0174468	0.4378	0.014811	0.5419	0.0301212	0.246	0.0248898	0.3662	0.015331	0.5976	0.0503362	0.2206	0.0395062	0.433	0.0614594	0.2911	0.0553176	0.3956	0.118411	0.09662	0.0910632	0.2376	0.100458	0.2228	0.145214	0.09665	0.0525038	0.5707
average cM/Mb	0.0167792	0.4136	0.028661	0.2024	0.0170237	0.4833	0.0426467	0.1004	0.035642	0.1956	0.0276065	0.3418	0.0417681	0.3095	0.0231005	0.6467	0.0366167	0.5296	0.0328699	0.6139	0.0777316	0.2764	0.0468379	0.5442	0.0733172	0.3742	0.0930099	0.2888	0.000102509	0.9991
f(B6xCAST) cM		0		222		0		222		0		0		0		0		0		0		0		0		0		0		0
f(CASTxB6) cM		0		0		0		222		222		0		0		0		0		0		0		0		0		0		0
m(B6xCAST) cM		0		0		0		0		0		0		0		0		0		0		0		0		0		222		0
m(CASTxB6) cM		0		0		0		0		0		0		0		0		0		0		222		0		0		0		0
female cM		0		0		0		222		0		0		0		0		0		0		0		0		0		0		0
male cM		0		0		0		0		0		0		0		0		0		0		222		0		0		222		0
average cM		0		0		0		0		0		0		0		0		0		0		0		0		0		0		0

[truncated: 9 more sheets: rRNA, satellite, scRNA, simple repeat, SINE, snRNA, srpRNA, tRNA, unknown]
