# Supplementary material for: Patterns of Recombination Activity on Mouse Chromosome 11 Revealed by High Resolution Mapping
Source: PLoS One. 2010 Dec 8;5(12):e15340. doi: 10.1371/journal.pone.0015340 (PMC2999565; doi:10.1371/journal.pone.0015340)
Supplement: Table S4 — Correlations between recombination rates and different genomic features in 10-Mb segments along the chromosome. In addition to correlation across the entire chromosome 11, it is of interest to identify localized correlations between genomic features and recombination. The chromosome was divided into twelve sections of 10 Mb. The sectional analysis was performed twice for each section size category per window size. The first began at 3 Mb and proceeded through 123 Mb, which was truncated to 121.7 Mb. The second began at 121.7 Mb and continued to 1.7 Mb, truncated to 3 Mb. Correlations were calculated for the same genomic features as in Table S3. (XLSX) [file pone.0015340.s004.xlsx]

## Sheet: GC
section (Mbp position)	cross	100.cor	100.sig	200.cor	200.sig	400.cor	400.sig	500.cor	500.sig	111111	100kb	200kb	400kb	500kb	SUM	cross	section
3-13	f(B6xCAST)-cM	-0.0396281	0.69771	-0.0781571	0.58788	-0.188445	0.37136	-0.152152	0.5171		0	0	0	0	0	f(B6xCAST)-cM	A
	f(CASTxB6)-cM	-0.0545881	0.59246	-0.0912131	0.53232	-0.148983	0.50808	-0.179296	0.4479		0	0	0	0	0	f(CASTxB6)-cM	A
	m(B6xCAST)-cM	0.132241	0.19067	0.157083	0.28313	0.118166	0.58019	0.176656	0.45826		0	0	0	0	0	m(B6xCAST)-cM	A
	m(CASTxB6)-cM	0.0733021	0.46915	0.0970031	0.50559	0.0669981	0.75166	0.102686	0.6621		0	0	0	0	0	m(CASTxB6)-cM	A
	female-cM	-0.0494661	0.62727	-0.0874451	0.54603	-0.169367	0.43513	-0.172367	0.46605		0	0	0	0	0	female-cM	A
	male-cM	0.115318	0.25402	0.136512	0.35351	0.0997751	0.63522	0.157134	0.50386		0	0	0	0	0	male-cM	A
	ave-cM	0.0039341	0.96871	-0.0070601	0.96158	-0.0857291	0.68943	-0.0822181	0.72523		0	0	0	0	0	ave-cM	A
3-13	f(B6xCAST)-cM/Mb	-0.0396281	0.69467	-0.0781571	0.588	-0.188445	0.36965	-0.152152	0.51862		0	0	0	0	0	f(B6xCAST)-cM/Mb	A
	f(CASTxB6)-cM/Mb	-0.0545881	0.5939	-0.0912131	0.52727	-0.148983	0.50444	-0.179295	0.45068		0	0	0	0	0	f(CASTxB6)-cM/Mb	A
	m(B6xCAST)-cM/Mb	0.132241	0.19203	0.157083	0.28564	0.118166	0.58061	0.176656	0.45801		0	0	0	0	0	m(B6xCAST)-cM/Mb	A
	m(CASTxB6)-cM/Mb	0.0733021	0.47452	0.0970031	0.50848	0.0669981	0.74963	0.102686	0.66177		0	0	0	0	0	m(CASTxB6)-cM/Mb	A
	female-cM/Mb	-0.0494661	0.62962	-0.0874451	0.54364	-0.169367	0.43765	-0.172367	0.46342		0	0	0	0	0	female-cM/Mb	A
	male-cM/Mb	0.115318	0.25203	0.136512	0.35577	0.0997751	0.63628	0.157134	0.50058		0	0	0	0	0	male-cM/Mb	A
	ave-cM/Mb	0.0039341	0.97063	-0.0070601	0.96111	-0.0857281	0.68793	-0.0822181	0.72705		0	0	0	0	0	ave-cM/Mb	A
13-23	f(B6xCAST)-cM	0.0686411	0.52515	0.0467241	0.77168	0.0514491	0.82708	0.0503311	0.84699		0	0	0	0	0	f(B6xCAST)-cM	B
	f(CASTxB6)-cM	0.0379021	0.72733	0.0030491	0.98447	-0.0141191	0.95027	-0.0290131	0.91009		0	0	0	0	0	f(CASTxB6)-cM	B
	m(B6xCAST)-cM	0.264066	0.0087101	0.266384	0.0666401	0.300046	0.15916	0.375957	0.10755		111111	0	0	0	111111	m(B6xCAST)-cM	B
	m(CASTxB6)-cM	0.202763	0.0436901	0.176589	0.23341	0.221475	0.31734	0.236814	0.35719		111111	0	0	0	111111	m(CASTxB6)-cM	B
	female-cM	0.0532071	0.62437	0.0246621	0.87684	0.0170681	0.9402	0.0091661	0.9718		0	0	0	0	0	female-cM	B
	male-cM	0.242045	0.0158901	0.229893	0.11578	0.270794	0.21414	0.319008	0.19564		111111	0	0	0	111111	male-cM	B
	ave-cM	0.166087	0.0973401	0.147943	0.31491	0.180878	0.40257	0.220352	0.36615		0	0	0	0	0	ave-cM	B
13-23	f(B6xCAST)-cM/Mb	0.0686411	0.52794	0.0467241	0.77011	0.0514491	0.82492	0.0503311	0.84768		0	0	0	0	0	f(B6xCAST)-cM/Mb	B
	f(CASTxB6)-cM/Mb	0.0379021	0.72589	0.0030491	0.9847	-0.0141191	0.95028	-0.0290131	0.91012		0	0	0	0	0	f(CASTxB6)-cM/Mb	B
	m(B6xCAST)-cM/Mb	0.264066	0.0084001	0.266384	0.0664801	0.300046	0.16187	0.375957	0.10598		111111	0	0	0	111111	m(B6xCAST)-cM/Mb	B
	m(CASTxB6)-cM/Mb	0.202763	0.0426001	0.176589	0.23466	0.221475	0.31982	0.236814	0.35591		111111	0	0	0	111111	m(CASTxB6)-cM/Mb	B
	female-cM/Mb	0.0532071	0.6263	0.0246621	0.87636	0.0170681	0.941	0.0091661	0.9709		0	0	0	0	0	female-cM/Mb	B
	male-cM/Mb	0.242045	0.0160501	0.229893	0.11396	0.270794	0.21171	0.319009	0.19449		111111	0	0	0	111111	male-cM/Mb	B
	ave-cM/Mb	0.166087	0.0953201	0.147943	0.31785	0.180877	0.40307	0.220352	0.36471		0	0	0	0	0	ave-cM/Mb	B
23-33	f(B6xCAST)-cM	-0.0774841	0.44434	-0.0763541	0.59877	-0.0880471	0.66985	-0.101992	0.66407		0	0	0	0	0	f(B6xCAST)-cM	C
	f(CASTxB6)-cM	0.0128051	0.90113	0.0628911	0.67101	0.0353261	0.86637	0.0269771	0.90664		0	0	0	0	0	f(CASTxB6)-cM	C
	m(B6xCAST)-cM	0.348976	0.0012701	0.450825	0.0022801	0.507073	0.0134501	0.598705	0.0105201		111111	111111	111111	111111	444444	m(B6xCAST)-cM	C
	m(CASTxB6)-cM	0.189726	0.0603001	0.283212	0.0480301	0.278265	0.17471	0.306824	0.18105		0	111111	0	0	111111	m(CASTxB6)-cM	C
	female-cM	-0.0322371	0.75271	-0.0033371	0.98294	-0.0217771	0.91672	-0.0327461	0.88637		0	0	0	0	0	female-cM	C
	male-cM	0.289093	0.0056001	0.39258	0.0075201	0.419921	0.0386701	0.477835	0.0381801		111111	111111	111111	111111	444444	male-cM	C
	ave-cM	0.114828	0.25599	0.197138	0.17295	0.201012	0.34166	0.210313	0.38121		0	0	0	0	0	ave-cM	C
23-33	f(B6xCAST)-cM/Mb	-0.0774841	0.44485	-0.0763541	0.59928	-0.0880471	0.66888	-0.101991	0.66465		0	0	0	0	0	f(B6xCAST)-cM/Mb	C
	f(CASTxB6)-cM/Mb	0.0128051	0.90157	0.0628911	0.67202	0.0353261	0.86637	0.0269771	0.90566		0	0	0	0	0	f(CASTxB6)-cM/Mb	C
	m(B6xCAST)-cM/Mb	0.348976	0.0013201	0.450826	0.0021501	0.507073	0.0139401	0.598705	0.0104101		111111	111111	111111	111111	444444	m(B6xCAST)-cM/Mb	C
	m(CASTxB6)-cM/Mb	0.189726	0.0607301	0.283212	0.0480601	0.278265	0.17366	0.306824	0.18337		0	111111	0	0	111111	m(CASTxB6)-cM/Mb	C
	female-cM/Mb	-0.0322371	0.75292	-0.0033371	0.98177	-0.0217761	0.91693	-0.0327461	0.88642		0	0	0	0	0	female-cM/Mb	C
	male-cM/Mb	0.289093	0.0062901	0.392581	0.0069301	0.419922	0.0369201	0.477835	0.0378101		111111	111111	111111	111111	444444	male-cM/Mb	C
	ave-cM/Mb	0.114828	0.25499	0.197138	0.17172	0.201012	0.34049	0.210313	0.37924		0	0	0	0	0	ave-cM/Mb	C
33-43	f(B6xCAST)-cM	0.155321	0.11736	0.185855	0.19963	0.193059	0.3607	0.209457	0.38231		0	0	0	0	0	f(B6xCAST)-cM	D
	f(CASTxB6)-cM	0.137783	0.17434	0.169767	0.24786	0.183181	0.3882	0.181387	0.44756		0	0	0	0	0	f(CASTxB6)-cM	D
	m(B6xCAST)-cM	0.391999	1.01e-05	0.492717	0.0002101	0.571323	0.0033301	0.587155	0.0077501		111111	111111	111111	111111	444444	m(B6xCAST)-cM	D
	m(CASTxB6)-cM	0.20448	0.0405601	0.221056	0.12513	0.245234	0.23861	0.241633	0.30713		111111	0	0	0	111111	m(CASTxB6)-cM	D
	female-cM	0.151308	0.12737	0.182832	0.20842	0.19318	0.36191	0.199423	0.40582		0	0	0	0	0	female-cM	D
	male-cM	0.314075	0.0020001	0.370607	0.0090401	0.431327	0.0311501	0.427412	0.0563801		111111	111111	111111	0	333333	male-cM	D
	ave-cM	0.230236	0.0208801	0.276633	0.0492901	0.316959	0.12219	0.323003	0.16505		111111	111111	0	0	222222	ave-cM	D
33-43	f(B6xCAST)-cM/Mb	0.155321	0.11828	0.185855	0.19788	0.193059	0.36492	0.209457	0.38433		0	0	0	0	0	f(B6xCAST)-cM/Mb	D
	f(CASTxB6)-cM/Mb	0.137784	0.1739	0.169767	0.24923	0.183181	0.38758	0.181387	0.4491		0	0	0	0	0	f(CASTxB6)-cM/Mb	D
	m(B6xCAST)-cM/Mb	0.391999	2.01e-05	0.492716	0.0002601	0.571323	0.0034301	0.587155	0.0075101		111111	111111	111111	111111	444444	m(B6xCAST)-cM/Mb	D
	m(CASTxB6)-cM/Mb	0.20448	0.0418301	0.221056	0.12567	0.245234	0.24019	0.241633	0.30739		111111	0	0	0	111111	m(CASTxB6)-cM/Mb	D
	female-cM/Mb	0.151308	0.12991	0.182832	0.20982	0.19318	0.36074	0.199423	0.40368		0	0	0	0	0	female-cM/Mb	D
	male-cM/Mb	0.314075	0.0019001	0.370607	0.0085201	0.431327	0.0317601	0.427412	0.0557701		111111	111111	111111	0	333333	male-cM/Mb	D
	ave-cM/Mb	0.230236	0.0199401	0.276633	0.0491701	0.316959	0.12105	0.323002	0.16413		111111	111111	0	0	222222	ave-cM/Mb	D
43-53	f(B6xCAST)-cM	0.0539271	0.59625	0.0624371	0.66779	0.0286971	0.89182	-0.0313491	0.89782		0	0	0	0	0	f(B6xCAST)-cM	E
	f(CASTxB6)-cM	0.0837391	0.40709	0.0962201	0.50772	0.0899821	0.66998	-0.0135171	0.95454		0	0	0	0	0	f(CASTxB6)-cM	E
	m(B6xCAST)-cM	0.149816	0.13524	0.188834	0.18994	0.25324	0.22455	0.210203	0.37653		0	0	0	0	0	m(B6xCAST)-cM	E
	m(CASTxB6)-cM	0.15131	0.13241	0.172607	0.23648	0.226877	0.28277	0.15205	0.52437		0	0	0	0	0	m(CASTxB6)-cM	E
	female-cM	0.0764681	0.45083	0.0883041	0.5412	0.0673121	0.74771	-0.0242211	0.92045		0	0	0	0	0	female-cM	E
	male-cM	0.151737	0.13164	0.18147	0.21259	0.240283	0.25405	0.180887	0.45005		0	0	0	0	0	male-cM	E
	ave-cM	0.142472	0.15687	0.167159	0.24907	0.207924	0.32418	0.125837	0.59992		0	0	0	0	0	ave-cM	E
43-53	f(B6xCAST)-cM/Mb	0.0539271	0.59636	0.0624381	0.66789	0.0286971	0.89306	-0.0313491	0.89576		0	0	0	0	0	f(B6xCAST)-cM/Mb	E
	f(CASTxB6)-cM/Mb	0.0837391	0.41015	0.0962201	0.50765	0.0899821	0.67171	-0.0135171	0.9546		0	0	0	0	0	f(CASTxB6)-cM/Mb	E
	m(B6xCAST)-cM/Mb	0.149816	0.14031	0.188834	0.18968	0.25324	0.22564	0.210204	0.3787		0	0	0	0	0	m(B6xCAST)-cM/Mb	E
	m(CASTxB6)-cM/Mb	0.15131	0.13291	0.172607	0.23298	0.226877	0.28348	0.15205	0.52868		0	0	0	0	0	m(CASTxB6)-cM/Mb	E
	female-cM/Mb	0.0764681	0.45073	0.0883041	0.54136	0.0673121	0.74665	-0.0242211	0.91941		0	0	0	0	0	female-cM/Mb	E
	male-cM/Mb	0.151737	0.13232	0.18147	0.20948	0.240283	0.25269	0.180887	0.44969		0	0	0	0	0	male-cM/Mb	E
	ave-cM/Mb	0.142472	0.15606	0.167159	0.24833	0.207924	0.32571	0.125837	0.60368		0	0	0	0	0	ave-cM/Mb	E
53-63	f(B6xCAST)-cM	-0.113053	0.26521	-0.172126	0.23706	-0.207505	0.32252	-0.18748	0.42924		0	0	0	0	0	f(B6xCAST)-cM	F
	f(CASTxB6)-cM	-0.0497851	0.63206	-0.0666471	0.64981	-0.0048841	0.9819	0.0725591	0.76648		0	0	0	0	0	f(CASTxB6)-cM	F
	m(B6xCAST)-cM	0.0079531	0.93869	0.0370551	0.80337	0.0448531	0.83115	0.0257921	0.92151		0	0	0	0	0	m(B6xCAST)-cM	F
	m(CASTxB6)-cM	0.127673	0.20869	0.194128	0.17746	0.193782	0.35228	0.215212	0.37155		0	0	0	0	0	m(CASTxB6)-cM	F
	female-cM	-0.0790521	0.43898	-0.117138	0.42438	-0.103417	0.62444	-0.0514611	0.83092		0	0	0	0	0	female-cM	F
	male-cM	0.0800671	0.43176	0.135605	0.35011	0.140127	0.50376	0.139265	0.57487		0	0	0	0	0	male-cM	F
	ave-cM	0.0391811	0.70261	0.0720191	0.62385	0.0835601	0.69175	0.101915	0.67299		0	0	0	0	0	ave-cM	F
53-63	f(B6xCAST)-cM/Mb	-0.113052	0.26373	-0.172126	0.23488	-0.207505	0.32469	-0.18748	0.42778		0	0	0	0	0	f(B6xCAST)-cM/Mb	F
	f(CASTxB6)-cM/Mb	-0.0497861	0.63231	-0.0666471	0.65051	-0.0048841	0.98183	0.0725591	0.76548		0	0	0	0	0	f(CASTxB6)-cM/Mb	F
	m(B6xCAST)-cM/Mb	0.0079531	0.93869	0.0370551	0.80113	0.0448531	0.83058	0.0257921	0.92114		0	0	0	0	0	m(B6xCAST)-cM/Mb	F
	m(CASTxB6)-cM/Mb	0.127673	0.20715	0.194128	0.17533	0.193782	0.35724	0.215212	0.37306		0	0	0	0	0	m(CASTxB6)-cM/Mb	F
	female-cM/Mb	-0.0790521	0.44048	-0.117138	0.42319	-0.103418	0.62654	-0.0514611	0.83305		0	0	0	0	0	female-cM/Mb	F
	male-cM/Mb	0.0800671	0.43204	0.135605	0.35202	0.140128	0.50411	0.139265	0.5777		0	0	0	0	0	male-cM/Mb	F
	ave-cM/Mb	0.0391811	0.70171	0.0720191	0.62398	0.0835601	0.6919	0.101914	0.67425		0	0	0	0	0	ave-cM/Mb	F
63-73	f(B6xCAST)-cM	-0.101841	0.31897	-0.152669	0.29447	-0.192915	0.36195	-0.275436	0.24344		0	0	0	0	0	f(B6xCAST)-cM	G
	f(CASTxB6)-cM	-0.104917	0.3058	-0.14512	0.31779	-0.252617	0.23149	-0.27933	0.23556		0	0	0	0	0	f(CASTxB6)-cM	G
	m(B6xCAST)-cM	0.0252591	0.80744	-0.0079461	0.95827	-0.0545371	0.80123	-0.136431	0.57512		0	0	0	0	0	m(B6xCAST)-cM	G
	m(CASTxB6)-cM	0.0148571	0.88543	0.0130131	0.92931	-0.0168631	0.93743	-0.0084891	0.97066		0	0	0	0	0	m(CASTxB6)-cM	G
	female-cM	-0.111756	0.27403	-0.162432	0.2628	-0.238581	0.25769	-0.298969	0.2043		0	0	0	0	0	female-cM	G
	male-cM	0.0216021	0.83418	0.0016641	0.99117	-0.0392221	0.85526	-0.0840061	0.72926		0	0	0	0	0	male-cM	G
	ave-cM	-0.0628241	0.53967	-0.102577	0.48488	-0.169003	0.4307	-0.23364	0.32806		0	0	0	0	0	ave-cM	G
63-73	f(B6xCAST)-cM/Mb	-0.101841	0.31791	-0.152669	0.29378	-0.192915	0.36232	-0.275436	0.24376		0	0	0	0	0	f(B6xCAST)-cM/Mb	G
	f(CASTxB6)-cM/Mb	-0.104918	0.30419	-0.14512	0.31949	-0.252617	0.22952	-0.27933	0.23985		0	0	0	0	0	f(CASTxB6)-cM/Mb	G
	m(B6xCAST)-cM/Mb	0.0252591	0.80878	-0.0079461	0.95748	-0.0545371	0.80156	-0.136431	0.57539		0	0	0	0	0	m(B6xCAST)-cM/Mb	G
	m(CASTxB6)-cM/Mb	0.0148571	0.88496	0.0130131	0.92816	-0.0168621	0.93741	-0.0084891	0.97207		0	0	0	0	0	m(CASTxB6)-cM/Mb	G
	female-cM/Mb	-0.111756	0.27214	-0.162432	0.26384	-0.238581	0.25815	-0.298969	0.20461		0	0	0	0	0	female-cM/Mb	G
	male-cM/Mb	0.0216021	0.83344	0.0016641	0.99094	-0.0392231	0.85515	-0.0840061	0.7298		0	0	0	0	0	male-cM/Mb	G
	ave-cM/Mb	-0.0628251	0.53946	-0.102577	0.48428	-0.169003	0.43119	-0.23364	0.32682		0	0	0	0	0	ave-cM/Mb	G
73-83	f(B6xCAST)-cM	0.0477671	0.65043	0.0334371	0.81721	0.0569991	0.7922	-0.0045461	0.98518		0	0	0	0	0	f(B6xCAST)-cM	H
	f(CASTxB6)-cM	0.0665101	0.50859	0.0698931	0.62655	0.0466451	0.82509	-0.0374121	0.87527		0	0	0	0	0	f(CASTxB6)-cM	H
	m(B6xCAST)-cM	0.193341	0.0507701	0.226824	0.11408	0.278627	0.17523	0.265504	0.25937		0	0	0	0	0	m(B6xCAST)-cM	H
	m(CASTxB6)-cM	0.181201	0.0686801	0.23749	0.0959901	0.322959	0.10862	0.296784	0.20536		0	0	0	0	0	m(CASTxB6)-cM	H
	female-cM	0.0604681	0.55788	0.0539291	0.71208	0.0538341	0.80026	-0.0208531	0.9305		0	0	0	0	0	female-cM	H
	male-cM	0.193659	0.0491101	0.239898	0.0911401	0.308547	0.12641	0.291187	0.21467		111111	0	0	0	111111	male-cM	H
	ave-cM	0.138343	0.16903	0.156179	0.28072	0.188682	0.36346	0.127132	0.598		0	0	0	0	0	ave-cM	H
73-83	f(B6xCAST)-cM/Mb	0.0477661	0.64788	0.0334371	0.81743	0.0569991	0.78982	-0.0045461	0.98515		0	0	0	0	0	f(B6xCAST)-cM/Mb	H
	f(CASTxB6)-cM/Mb	0.0665101	0.51309	0.0698921	0.62857	0.0466461	0.82506	-0.0374121	0.87333		0	0	0	0	0	f(CASTxB6)-cM/Mb	H
	m(B6xCAST)-cM/Mb	0.193341	0.0507701	0.226824	0.11354	0.278627	0.1765	0.265503	0.25733		0	0	0	0	0	m(B6xCAST)-cM/Mb	H
	m(CASTxB6)-cM/Mb	0.181201	0.0685901	0.23749	0.0976501	0.322959	0.1085	0.296785	0.20358		0	0	0	0	0	m(CASTxB6)-cM/Mb	H
	female-cM/Mb	0.0604681	0.55756	0.0539301	0.71097	0.0538331	0.80157	-0.0208541	0.93036		0	0	0	0	0	female-cM/Mb	H
	male-cM/Mb	0.193659	0.0501701	0.239898	0.0944301	0.308547	0.12595	0.291186	0.21483		0	0	0	0	0	male-cM/Mb	H
	ave-cM/Mb	0.138341	0.17133	0.156179	0.27724	0.188682	0.36602	0.127132	0.59882		0	0	0	0	0	ave-cM/Mb	H
83-93	f(B6xCAST)-cM	0.170543	0.0933201	0.232858	0.10847	0.321695	0.11883	0.424053	0.0634401		0	0	0	0	0	f(B6xCAST)-cM	I
	f(CASTxB6)-cM	0.126659	0.22208	0.176649	0.23336	0.208006	0.33014	0.241531	0.32694		0	0	0	0	0	f(CASTxB6)-cM	I
	m(B6xCAST)-cM	0.163888	0.10394	0.241496	0.0903801	0.356343	0.0796601	0.460758	0.0393501		0	0	0	111111	111111	m(B6xCAST)-cM	I
	m(CASTxB6)-cM	0.0886991	0.4208	0.147886	0.34095	0.211089	0.33996	0.260888	0.29851		0	0	0	0	0	m(CASTxB6)-cM	I
	female-cM	0.153354	0.13804	0.212857	0.1459	0.277128	0.18898	0.334297	0.15833		0	0	0	0	0	female-cM	I
	male-cM	0.117235	0.26523	0.189404	0.20079	0.273474	0.1972	0.340615	0.15562		0	0	0	0	0	male-cM	I
	ave-cM	0.14645	0.15679	0.215	0.13983	0.292924	0.16084	0.353478	0.13785		0	0	0	0	0	ave-cM	I
83-93	f(B6xCAST)-cM/Mb	0.170543	0.0929401	0.232858	0.10769	0.321695	0.11632	0.424053	0.0616401		0	0	0	0	0	f(B6xCAST)-cM/Mb	I
	f(CASTxB6)-cM/Mb	0.126659	0.2228	0.176649	0.23675	0.208006	0.3293	0.241531	0.32703		0	0	0	0	0	f(CASTxB6)-cM/Mb	I
	m(B6xCAST)-cM/Mb	0.163888	0.10563	0.241497	0.0908101	0.356343	0.0779601	0.460758	0.0382101		0	0	0	111111	111111	m(B6xCAST)-cM/Mb	I
	m(CASTxB6)-cM/Mb	0.0886991	0.42067	0.147886	0.343	0.211089	0.34118	0.260888	0.29698		0	0	0	0	0	m(CASTxB6)-cM/Mb	I
	female-cM/Mb	0.153354	0.13543	0.212857	0.14718	0.277128	0.1857	0.334297	0.1567		0	0	0	0	0	female-cM/Mb	I
	male-cM/Mb	0.117234	0.26726	0.189404	0.19991	0.273473	0.197	0.340615	0.15431		0	0	0	0	0	male-cM/Mb	I
	ave-cM/Mb	0.14645	0.15496	0.215	0.13943	0.292924	0.16184	0.353478	0.13728		0	0	0	0	0	ave-cM/Mb	I
93-103	f(B6xCAST)-cM	0.0316881	0.75682	0.0239761	0.87258	-0.0476111	0.82437	-0.104462	0.66739		0	0	0	0	0	f(B6xCAST)-cM	J
	f(CASTxB6)-cM	0.0088621	0.93068	-0.0530421	0.71632	-0.184731	0.37662	-0.290023	0.2189		0	0	0	0	0	f(CASTxB6)-cM	J
	m(B6xCAST)-cM	0.0991631	0.32996	0.141337	0.32448	0.186774	0.37402	0.207305	0.37741		0	0	0	0	0	m(B6xCAST)-cM	J
	m(CASTxB6)-cM	0.13785	0.17215	0.141488	0.3266	0.221681	0.28599	0.188856	0.42921		0	0	0	0	0	m(CASTxB6)-cM	J
	female-cM	0.0212001	0.83526	-0.0160011	0.9138	-0.118713	0.57452	-0.193545	0.42069		0	0	0	0	0	female-cM	J
	male-cM	0.126826	0.21073	0.149951	0.29602	0.22038	0.2916	0.21007	0.37229		0	0	0	0	0	male-cM	J
	ave-cM	0.0871191	0.39002	0.0765791	0.59877	0.0600221	0.77597	0.0083901	0.97191		0	0	0	0	0	ave-cM	J
93-103	f(B6xCAST)-cM/Mb	0.0316871	0.75758	0.0239761	0.87123	-0.0476111	0.82347	-0.104463	0.66732		0	0	0	0	0	f(B6xCAST)-cM/Mb	J
	f(CASTxB6)-cM/Mb	0.0088621	0.93062	-0.0530421	0.71739	-0.18473	0.37592	-0.290023	0.21898		0	0	0	0	0	f(CASTxB6)-cM/Mb	J
	m(B6xCAST)-cM/Mb	0.0991621	0.32942	0.141337	0.32682	0.186774	0.37268	0.207305	0.37939		0	0	0	0	0	m(B6xCAST)-cM/Mb	J
	m(CASTxB6)-cM/Mb	0.13785	0.17301	0.141488	0.32546	0.221681	0.28775	0.188856	0.4287		0	0	0	0	0	m(CASTxB6)-cM/Mb	J
	female-cM/Mb	0.0212001	0.83624	-0.0160011	0.9117	-0.118713	0.57479	-0.193545	0.41951		0	0	0	0	0	female-cM/Mb	J
	male-cM/Mb	0.126826	0.20902	0.149951	0.29672	0.22038	0.28683	0.21007	0.37499		0	0	0	0	0	male-cM/Mb	J
	ave-cM/Mb	0.0871191	0.39178	0.0765791	0.59529	0.0600221	0.77686	0.0083901	0.97261		0	0	0	0	0	ave-cM/Mb	J
103-113	f(B6xCAST)-cM	0.0929811	0.37495	0.113659	0.45106	0.191182	0.38185	0.0947441	0.71549		0	0	0	0	0	f(B6xCAST)-cM	K
	f(CASTxB6)-cM	-0.0038021	0.97147	-0.0131221	0.93062	0.0107261	0.95992	-0.0534961	0.87958		0	0	0	0	0	f(CASTxB6)-cM	K
	m(B6xCAST)-cM	0.126228	0.22013	0.207328	0.15278	0.285081	0.17034	0.238884	0.31341		0	0	0	0	0	m(B6xCAST)-cM	K
	m(CASTxB6)-cM	0.191733	0.0508601	0.26265	0.0581501	0.356132	0.0750401	0.359425	0.1211		0	0	0	0	0	m(CASTxB6)-cM	K
	female-cM	0.0431001	0.68688	0.0498611	0.74601	0.0992071	0.64839	0.0132371	0.96647		0	0	0	0	0	female-cM	K
	male-cM	0.167499	0.0947101	0.24706	0.0806601	0.336762	0.0976001	0.322251	0.16975		0	0	0	0	0	male-cM	K
	ave-cM	0.121481	0.23731	0.173814	0.2354	0.243421	0.2479	0.183923	0.45419		0	0	0	0	0	ave-cM	K
103-113	f(B6xCAST)-cM/Mb	0.0929811	0.37555	0.113659	0.45089	0.191182	0.38098	0.0947441	0.71656		0	0	0	0	0	f(B6xCAST)-cM/Mb	K
	f(CASTxB6)-cM/Mb	-0.0038021	0.97186	-0.0131221	0.93204	0.0107261	0.96002	-0.0534961	0.87924		0	0	0	0	0	f(CASTxB6)-cM/Mb	K
	m(B6xCAST)-cM/Mb	0.126228	0.22008	0.207328	0.15295	0.285081	0.17216	0.238884	0.31188		0	0	0	0	0	m(B6xCAST)-cM/Mb	K
	m(CASTxB6)-cM/Mb	0.191733	0.0494901	0.26265	0.0604801	0.356132	0.0745101	0.359425	0.12054		111111	0	0	0	111111	m(CASTxB6)-cM/Mb	K
	female-cM/Mb	0.0431001	0.68727	0.0498611	0.74714	0.0992071	0.64418	0.0132371	0.96734		0	0	0	0	0	female-cM/Mb	K
	male-cM/Mb	0.167499	0.0939801	0.24706	0.0798101	0.336762	0.0970401	0.322251	0.16981		0	0	0	0	0	male-cM/Mb	K
	ave-cM/Mb	0.121481	0.23823	0.173814	0.2342	0.243421	0.24743	0.183923	0.45517		0	0	0	0	0	ave-cM/Mb	K
113-121.7	f(B6xCAST)-cM	0.0738911	0.47691	0.134479	0.35743	0.251776	0.24143	0.284993	0.22169		0	0	0	0	0	f(B6xCAST)-cM	L
	f(CASTxB6)-cM	0.0168031	0.87183	0.0327421	0.81809	0.0940411	0.65321	0.196532	0.45998		0	0	0	0	0	f(CASTxB6)-cM	L
	m(B6xCAST)-cM	0.141157	0.1815	0.0966061	0.52048	0.142977	0.50412	0.303557	0.17427		0	0	0	0	0	m(B6xCAST)-cM	L
	m(CASTxB6)-cM	0.0962111	0.36394	0.114466	0.44139	0.161313	0.46605	0.278714	0.28959		0	0	0	0	0	m(CASTxB6)-cM	L
	female-cM	0.0454811	0.66054	0.0837811	0.55855	0.17436	0.40449	0.255011	0.32044		0	0	0	0	0	female-cM	L
	male-cM	0.124386	0.23891	0.110077	0.46412	0.159206	0.46622	0.304595	0.19248		0	0	0	0	0	male-cM	L
	ave-cM	0.101832	0.33549	0.105207	0.48006	0.170712	0.43886	0.298303	0.24702		0	0	0	0	0	ave-cM	L
113-121.7	f(B6xCAST)-cM/Mb	0.0738921	0.47687	0.134479	0.35526	0.251776	0.24321	0.284993	0.22448		0	0	0	0	0	f(B6xCAST)-cM/Mb	L
	f(CASTxB6)-cM/Mb	0.0168031	0.86815	0.0327421	0.82004	0.0940401	0.65491	0.196532	0.46348		0	0	0	0	0	f(CASTxB6)-cM/Mb	L
	m(B6xCAST)-cM/Mb	0.141157	0.17963	0.0966061	0.52346	0.142977	0.50297	0.303557	0.17355		0	0	0	0	0	m(B6xCAST)-cM/Mb	L
	m(CASTxB6)-cM/Mb	0.0962111	0.36411	0.114466	0.44159	0.161312	0.46746	0.278714	0.28672		0	0	0	0	0	m(CASTxB6)-cM/Mb	L
	female-cM/Mb	0.0454811	0.661	0.0837811	0.55982	0.17436	0.40556	0.255011	0.31941		0	0	0	0	0	female-cM/Mb	L
	male-cM/Mb	0.124386	0.24088	0.110077	0.46535	0.159206	0.46507	0.304595	0.19295		0	0	0	0	0	male-cM/Mb	L
	ave-cM/Mb	0.101832	0.33304	0.105207	0.48161	0.170712	0.44004	0.298303	0.24547		0	0	0	0	0	ave-cM/Mb	L
3-11.7	f(B6xCAST)-cM	-0.0882121	0.41521	-0.143902	0.34763	-0.267225	0.2305	-0.267885	0.27834		0	0	0	0	0	f(B6xCAST)-cM	o
	f(CASTxB6)-cM	-0.101971	0.34749	-0.1532	0.32297	-0.212921	0.36508	-0.292856	0.23595		0	0	0	0	0	f(CASTxB6)-cM	o
	m(B6xCAST)-cM	0.140855	0.19257	0.161632	0.30913	0.117733	0.61582	0.144815	0.57193		0	0	0	0	0	m(B6xCAST)-cM	o
	m(CASTxB6)-cM	0.0835271	0.44595	0.114761	0.46949	0.0984271	0.66575	0.0680101	0.78996		0	0	0	0	0	m(CASTxB6)-cM	o
	female-cM	-0.0994711	0.35803	-0.153252	0.31932	-0.240811	0.29234	-0.291608	0.23806		0	0	0	0	0	female-cM	o
	male-cM	0.126214	0.24378	0.148691	0.35281	0.115544	0.62222	0.122574	0.62447		0	0	0	0	0	male-cM	o
	ave-cM	-0.0282121	0.79352	-0.0483481	0.75713	-0.139603	0.54704	-0.186297	0.45635		0	0	0	0	0	ave-cM	o
3-11.7	f(B6xCAST)-cM/Mb	-0.0882121	0.41272	-0.143902	0.35085	-0.267225	0.22942	-0.267885	0.2799		0	0	0	0	0	f(B6xCAST)-cM/Mb	o
	f(CASTxB6)-cM/Mb	-0.101971	0.34892	-0.1532	0.32006	-0.212921	0.3661	-0.292856	0.23432		0	0	0	0	0	f(CASTxB6)-cM/Mb	o
	m(B6xCAST)-cM/Mb	0.140855	0.19302	0.161632	0.30945	0.117733	0.61537	0.144815	0.56993		0	0	0	0	0	m(B6xCAST)-cM/Mb	o
	m(CASTxB6)-cM/Mb	0.0835271	0.44831	0.114761	0.46627	0.0984271	0.66517	0.0680101	0.78914		0	0	0	0	0	m(CASTxB6)-cM/Mb	o
	female-cM/Mb	-0.0994711	0.35653	-0.153252	0.3212	-0.240811	0.29171	-0.291608	0.23805		0	0	0	0	0	female-cM/Mb	o
	male-cM/Mb	0.126214	0.24034	0.148691	0.35321	0.115544	0.6221	0.122574	0.62515		0	0	0	0	0	male-cM/Mb	o
	ave-cM/Mb	-0.0282121	0.79444	-0.0483481	0.75697	-0.139602	0.54482	-0.186297	0.45495		0	0	0	0	0	ave-cM/Mb	o
11.7-21.7	f(B6xCAST)-cM	0.11933	0.24174	0.118787	0.42454	0.136483	0.5291	0.118473	0.632		0	0	0	0	0	f(B6xCAST)-cM	p
	f(CASTxB6)-cM	0.0843651	0.41571	0.0694631	0.6412	0.0600991	0.78415	0.0153551	0.9503		0	0	0	0	0	f(CASTxB6)-cM	p
	m(B6xCAST)-cM	0.245252	0.0180301	0.239984	0.10511	0.262839	0.23435	0.3203	0.18705		111111	0	0	0	111111	m(B6xCAST)-cM	p
	m(CASTxB6)-cM	0.243673	0.0172201	0.229041	0.11741	0.267977	0.21644	0.268758	0.27727		111111	0	0	0	111111	m(CASTxB6)-cM	p
	female-cM	0.101939	0.31977	0.0944721	0.53255	0.0976111	0.65684	0.0656691	0.79133		0	0	0	0	0	female-cM	p
	male-cM	0.249085	0.0165501	0.237576	0.11047	0.267272	0.22232	0.2986	0.22725		111111	0	0	0	111111	male-cM	p
	ave-cM	0.196503	0.0489901	0.190522	0.18772	0.218829	0.30372	0.234488	0.33628		111111	0	0	0	111111	ave-cM	p
11.7-21.7	f(B6xCAST)-cM/Mb	0.11933	0.24345	0.118787	0.42337	0.136483	0.52812	0.118473	0.62966		0	0	0	0	0	f(B6xCAST)-cM/Mb	p
	f(CASTxB6)-cM/Mb	0.0843651	0.41379	0.0694631	0.64356	0.0600991	0.7844	0.0153551	0.9501		0	0	0	0	0	f(CASTxB6)-cM/Mb	p
	m(B6xCAST)-cM/Mb	0.245252	0.0175001	0.239984	0.10357	0.262839	0.23335	0.3203	0.18715		111111	0	0	0	111111	m(B6xCAST)-cM/Mb	p
	m(CASTxB6)-cM/Mb	0.243673	0.0169601	0.229041	0.11826	0.267976	0.21503	0.268757	0.27787		111111	0	0	0	111111	m(CASTxB6)-cM/Mb	p
	female-cM/Mb	0.101939	0.32112	0.0944721	0.52536	0.0976111	0.65315	0.0656681	0.79138		0	0	0	0	0	female-cM/Mb	p
	male-cM/Mb	0.249085	0.0160001	0.237576	0.10839	0.267272	0.22202	0.2986	0.2247		111111	0	0	0	111111	male-cM/Mb	p
	ave-cM/Mb	0.196503	0.0483601	0.190522	0.18767	0.218829	0.30359	0.234488	0.33519		111111	0	0	0	111111	ave-cM/Mb	p
21.7-31.7	f(B6xCAST)-cM	-0.151553	0.13025	-0.183752	0.20162	-0.207834	0.30235	-0.277282	0.22675		0	0	0	0	0	f(B6xCAST)-cM	q
	f(CASTxB6)-cM	-0.110092	0.26977	-0.124665	0.39425	-0.183941	0.35514	-0.195371	0.39826		0	0	0	0	0	f(CASTxB6)-cM	q
	m(B6xCAST)-cM	0.310211	0.0034901	0.376897	0.0100801	0.434642	0.0317901	0.523694	0.0206901		111111	111111	111111	111111	444444	m(B6xCAST)-cM	q
	m(CASTxB6)-cM	-0.0025031	0.98032	0.0116451	0.93708	-0.0336681	0.86948	-0.0450051	0.85009		0	0	0	0	0	m(CASTxB6)-cM	q
	female-cM	-0.136817	0.17061	-0.160212	0.26235	-0.199911	0.31529	-0.239886	0.29696		0	0	0	0	0	female-cM	q
	male-cM	0.17842	0.0754601	0.232681	0.10239	0.260502	0.20396	0.315234	0.16925		0	0	0	0	0	male-cM	q
	ave-cM	-0.0061011	0.95279	0.0104761	0.94176	-0.0049631	0.98097	-0.0221561	0.92387		0	0	0	0	0	ave-cM	q
21.7-31.7	f(B6xCAST)-cM/Mb	-0.151554	0.13121	-0.183752	0.20272	-0.207834	0.30388	-0.277281	0.22981		0	0	0	0	0	f(B6xCAST)-cM/Mb	q
	f(CASTxB6)-cM/Mb	-0.110092	0.26496	-0.124665	0.39136	-0.183941	0.35596	-0.195371	0.39507		0	0	0	0	0	f(CASTxB6)-cM/Mb	q
	m(B6xCAST)-cM/Mb	0.310211	0.0033701	0.376897	0.0094501	0.434643	0.0318601	0.523694	0.0202401		111111	111111	111111	111111	444444	m(B6xCAST)-cM/Mb	q
	m(CASTxB6)-cM/Mb	-0.0025031	0.98044	0.0116451	0.93651	-0.0336681	0.87196	-0.0450051	0.84646		0	0	0	0	0	m(CASTxB6)-cM/Mb	q
	female-cM/Mb	-0.136817	0.16782	-0.160212	0.26221	-0.199911	0.3141	-0.239886	0.29436		0	0	0	0	0	female-cM/Mb	q
	male-cM/Mb	0.17842	0.0751601	0.232681	0.10316	0.260502	0.20506	0.315234	0.17059		0	0	0	0	0	male-cM/Mb	q
	ave-cM/Mb	-0.0061001	0.95212	0.0104761	0.9438	-0.0049631	0.97998	-0.0221561	0.92372		0	0	0	0	0	ave-cM/Mb	q
31.7-41.7	f(B6xCAST)-cM	0.0951101	0.37808	0.108371	0.48626	0.0808341	0.71659	0.122555	0.61538		0	0	0	0	0	f(B6xCAST)-cM	r
	f(CASTxB6)-cM	0.0846671	0.41599	0.105333	0.47662	0.0891081	0.67574	0.115858	0.62931		0	0	0	0	0	f(CASTxB6)-cM	r
	m(B6xCAST)-cM	0.357922	5.01e-05	0.459433	0.0002401	0.533104	0.0046601	0.571022	0.0073001		111111	111111	111111	111111	444444	m(B6xCAST)-cM	r
	m(CASTxB6)-cM	0.18178	0.0701701	0.20244	0.1635	0.217428	0.29198	0.240626	0.30849		0	0	0	0	0	m(CASTxB6)-cM	r
	female-cM	0.0928801	0.37363	0.109854	0.46356	0.0871991	0.68456	0.121756	0.60832		0	0	0	0	0	female-cM	r
	male-cM	0.285274	0.0028401	0.345865	0.0131001	0.398327	0.0493701	0.419484	0.0678001		111111	111111	111111	0	333333	male-cM	r
	ave-cM	0.18484	0.0636101	0.227062	0.11355	0.248656	0.23486	0.282405	0.22576		0	0	0	0	0	ave-cM	r
31.7-41.7	f(B6xCAST)-cM/Mb	0.0951101	0.37858	0.108371	0.48439	0.0808341	0.7179	0.122555	0.61244		0	0	0	0	0	f(B6xCAST)-cM/Mb	r
	f(CASTxB6)-cM/Mb	0.0846671	0.4147	0.105333	0.47773	0.0891081	0.67741	0.115858	0.62777		0	0	0	0	0	f(CASTxB6)-cM/Mb	r
	m(B6xCAST)-cM/Mb	0.357921	2.01e-05	0.459433	0.0003101	0.533105	0.0046901	0.571021	0.0074901		111111	111111	111111	111111	444444	m(B6xCAST)-cM/Mb	r
	m(CASTxB6)-cM/Mb	0.18178	0.0713801	0.20244	0.15985	0.217427	0.29553	0.240626	0.30739		0	0	0	0	0	m(CASTxB6)-cM/Mb	r
	female-cM/Mb	0.0928801	0.37188	0.109854	0.45995	0.0871991	0.68261	0.121757	0.61102		0	0	0	0	0	female-cM/Mb	r
	male-cM/Mb	0.285275	0.0030301	0.345865	0.0117001	0.398327	0.0492501	0.419484	0.0683601		111111	111111	111111	0	333333	male-cM/Mb	r
	ave-cM/Mb	0.18484	0.0613901	0.227062	0.11548	0.248656	0.23573	0.282405	0.22808		0	0	0	0	0	ave-cM/Mb	r
41.7-51.7	f(B6xCAST)-cM	0.170521	0.0857601	0.226809	0.11011	0.258418	0.20683	0.20147	0.38553		0	0	0	0	0	f(B6xCAST)-cM	s
	f(CASTxB6)-cM	0.15994	0.11336	0.199384	0.16589	0.219812	0.28907	0.113772	0.63351		0	0	0	0	0	f(CASTxB6)-cM	s
	m(B6xCAST)-cM	0.195518	0.0481401	0.249436	0.0765001	0.323026	0.10845	0.291357	0.20651		111111	0	0	0	111111	m(B6xCAST)-cM	s
	m(CASTxB6)-cM	0.20891	0.0343101	0.24971	0.0741601	0.312579	0.12082	0.265509	0.25082		111111	0	0	0	111111	m(CASTxB6)-cM	s
	female-cM	0.180388	0.0726901	0.232173	0.10182	0.256446	0.21182	0.167622	0.4754		0	0	0	0	0	female-cM	s
	male-cM	0.204038	0.0394201	0.251157	0.0745901	0.318781	0.11709	0.279498	0.22618		111111	0	0	0	111111	male-cM	s
	ave-cM	0.218633	0.0260501	0.268036	0.0562401	0.330155	0.1011	0.259801	0.2631		111111	0	0	0	111111	ave-cM	s
41.7-51.7	f(B6xCAST)-cM/Mb	0.170521	0.0902601	0.226809	0.10982	0.258418	0.20714	0.201469	0.38569		0	0	0	0	0	f(B6xCAST)-cM/Mb	s
	f(CASTxB6)-cM/Mb	0.159939	0.11219	0.199384	0.168	0.219812	0.29152	0.113772	0.63479		0	0	0	0	0	f(CASTxB6)-cM/Mb	s
	m(B6xCAST)-cM/Mb	0.195518	0.0477701	0.249436	0.0765601	0.323026	0.10894	0.291357	0.20541		111111	0	0	0	111111	m(B6xCAST)-cM/Mb	s
	m(CASTxB6)-cM/Mb	0.20891	0.0343001	0.24971	0.0756001	0.312579	0.1219	0.265509	0.25072		111111	0	0	0	111111	m(CASTxB6)-cM/Mb	s
	female-cM/Mb	0.180387	0.0719201	0.232173	0.1009	0.256445	0.21227	0.167621	0.47664		0	0	0	0	0	female-cM/Mb	s
	male-cM/Mb	0.204038	0.0383201	0.251157	0.0743401	0.318781	0.11411	0.279498	0.22384		111111	0	0	0	111111	male-cM/Mb	s
	ave-cM/Mb	0.218633	0.0260101	0.268036	0.0560301	0.330155	0.10135	0.259801	0.26222		111111	0	0	0	111111	ave-cM/Mb	s
51.7-61.7	f(B6xCAST)-cM	-0.145109	0.1517	-0.173535	0.22847	-0.199691	0.33948	-0.175377	0.45766		0	0	0	0	0	f(B6xCAST)-cM	t
	f(CASTxB6)-cM	-0.0671871	0.51158	-0.0613831	0.6722	0.0169971	0.93578	0.10997	0.64802		0	0	0	0	0	f(CASTxB6)-cM	t
	m(B6xCAST)-cM	0.0595041	0.56432	0.117444	0.42628	0.201996	0.33642	0.225364	0.3498		0	0	0	0	0	m(B6xCAST)-cM	t
	m(CASTxB6)-cM	0.169281	0.0911401	0.248067	0.0817801	0.279821	0.17388	0.362433	0.11835		0	0	0	0	0	m(CASTxB6)-cM	t
	female-cM	-0.102618	0.31069	-0.113228	0.43462	-0.0822121	0.69584	-0.0200001	0.93365		0	0	0	0	0	female-cM	t
	male-cM	0.131218	0.19547	0.207653	0.14895	0.264342	0.20202	0.321137	0.16912		0	0	0	0	0	male-cM	t
	ave-cM	0.0551071	0.59056	0.106843	0.46644	0.164814	0.43447	0.233072	0.32709		0	0	0	0	0	ave-cM	t
51.7-61.7	f(B6xCAST)-cM/Mb	-0.145108	0.15132	-0.173535	0.22956	-0.199692	0.33971	-0.175377	0.45752		0	0	0	0	0	f(B6xCAST)-cM/Mb	t
	f(CASTxB6)-cM/Mb	-0.0671871	0.5107	-0.0613831	0.67158	0.0169971	0.93441	0.10997	0.64818		0	0	0	0	0	f(CASTxB6)-cM/Mb	t
	m(B6xCAST)-cM/Mb	0.0595051	0.55761	0.117444	0.42498	0.201996	0.34131	0.225364	0.35051		0	0	0	0	0	m(B6xCAST)-cM/Mb	t
	m(CASTxB6)-cM/Mb	0.169281	0.0933901	0.248067	0.0825501	0.279821	0.1761	0.362433	0.11742		0	0	0	0	0	m(CASTxB6)-cM/Mb	t
	female-cM/Mb	-0.102618	0.31322	-0.113229	0.43868	-0.0822121	0.69591	-0.0200001	0.93428		0	0	0	0	0	female-cM/Mb	t
	male-cM/Mb	0.131218	0.19601	0.207653	0.15087	0.264342	0.20431	0.321137	0.16811		0	0	0	0	0	male-cM/Mb	t
	ave-cM/Mb	0.0551071	0.58888	0.106843	0.46815	0.164814	0.43493	0.233072	0.32761		0	0	0	0	0	ave-cM/Mb	t
61.7-71.7	f(B6xCAST)-cM	-0.100707	0.32345	-0.18263	0.20292	-0.16897	0.4315	-0.257823	0.27924		0	0	0	0	0	f(B6xCAST)-cM	u
	f(CASTxB6)-cM	-0.106584	0.29874	-0.197216	0.17384	-0.224747	0.28925	-0.301004	0.20281		0	0	0	0	0	f(CASTxB6)-cM	u
	m(B6xCAST)-cM	-0.0126141	0.90544	-0.0290661	0.85834	-0.0518271	0.81905	-0.114025	0.68324		0	0	0	0	0	m(B6xCAST)-cM	u
	m(CASTxB6)-cM	0.0042881	0.96756	0.0152611	0.93124	-0.0003561	0.99895	-0.0540341	0.8537		0	0	0	0	0	m(CASTxB6)-cM	u
	female-cM	-0.110666	0.27868	-0.204392	0.15661	-0.207606	0.33192	-0.293589	0.21347		0	0	0	0	0	female-cM	u
	male-cM	-0.0034871	0.97429	-0.0044141	0.97932	-0.0237511	0.91737	-0.0822691	0.77743		0	0	0	0	0	male-cM	u
	ave-cM	-0.0486311	0.64174	-0.0886241	0.5573	-0.115969	0.58994	-0.20444	0.40181		0	0	0	0	0	ave-cM	u
61.7-71.7	f(B6xCAST)-cM/Mb	-0.100707	0.32091	-0.18263	0.20645	-0.16897	0.42819	-0.257823	0.2774		0	0	0	0	0	f(B6xCAST)-cM/Mb	u
	f(CASTxB6)-cM/Mb	-0.106585	0.29679	-0.197216	0.17172	-0.224747	0.2914	-0.301004	0.2012		0	0	0	0	0	f(CASTxB6)-cM/Mb	u
	m(B6xCAST)-cM/Mb	-0.0126131	0.90449	-0.0290661	0.8606	-0.0518271	0.82063	-0.114025	0.68055		0	0	0	0	0	m(B6xCAST)-cM/Mb	u
	m(CASTxB6)-cM/Mb	0.0042881	0.96682	0.0152611	0.93201	-0.0003561	0.99879	-0.0540341	0.85269		0	0	0	0	0	m(CASTxB6)-cM/Mb	u
	female-cM/Mb	-0.110666	0.27631	-0.204392	0.15733	-0.207607	0.33225	-0.29359	0.21444		0	0	0	0	0	female-cM/Mb	u
	male-cM/Mb	-0.0034871	0.97345	-0.0044141	0.97908	-0.0237511	0.91831	-0.0822691	0.7761		0	0	0	0	0	male-cM/Mb	u
	ave-cM/Mb	-0.0486311	0.6439	-0.0886241	0.56036	-0.115969	0.59252	-0.20444	0.40124		0	0	0	0	0	ave-cM/Mb	u
71.7-81.7	f(B6xCAST)-cM	0.0882291	0.3914	0.0885841	0.53961	0.0802071	0.7067	0.0401461	0.86417		0	0	0	0	0	f(B6xCAST)-cM	v
	f(CASTxB6)-cM	0.128201	0.19945	0.160374	0.26502	0.0640961	0.76447	0.0284521	0.90254		0	0	0	0	0	f(CASTxB6)-cM	v
	m(B6xCAST)-cM	0.243936	0.0112501	0.284655	0.0437801	0.317869	0.11718	0.298946	0.19953		111111	111111	0	0	222222	m(B6xCAST)-cM	v
	m(CASTxB6)-cM	0.219445	0.0238901	0.284892	0.0412801	0.378752	0.0565301	0.372768	0.10504		111111	111111	0	0	222222	m(CASTxB6)-cM	v
	female-cM	0.115764	0.25223	0.133	0.35564	0.0763201	0.72244	0.0386571	0.87212		0	0	0	0	0	female-cM	v
	male-cM	0.243243	0.0105001	0.29919	0.0322301	0.358576	0.0731301	0.351749	0.12877		111111	111111	0	0	222222	male-cM	v
	ave-cM	0.202039	0.0415201	0.242308	0.0861101	0.232977	0.26068	0.200089	0.39932		111111	0	0	0	111111	ave-cM	v
71.7-81.7	f(B6xCAST)-cM/Mb	0.0882291	0.39406	0.0885841	0.5399	0.0802071	0.70786	0.0401461	0.8663		0	0	0	0	0	f(B6xCAST)-cM/Mb	v
	f(CASTxB6)-cM/Mb	0.128201	0.20182	0.160373	0.26277	0.0640971	0.75895	0.0284521	0.90434		0	0	0	0	0	f(CASTxB6)-cM/Mb	v
	m(B6xCAST)-cM/Mb	0.243936	0.0113601	0.284655	0.0436501	0.317869	0.11759	0.298946	0.19897		111111	111111	0	0	222222	m(B6xCAST)-cM/Mb	v
	m(CASTxB6)-cM/Mb	0.219446	0.0234701	0.284892	0.0416901	0.378753	0.0570401	0.372769	0.10612		111111	111111	0	0	222222	m(CASTxB6)-cM/Mb	v
	female-cM/Mb	0.115764	0.25159	0.133001	0.35746	0.0763201	0.7209	0.0386561	0.87263		0	0	0	0	0	female-cM/Mb	v
	male-cM/Mb	0.243243	0.0104201	0.29919	0.0336001	0.358577	0.0720901	0.351749	0.12867		111111	111111	0	0	222222	male-cM/Mb	v
	ave-cM/Mb	0.202037	0.0414301	0.242308	0.0876101	0.232976	0.25899	0.200089	0.40093		111111	0	0	0	111111	ave-cM/Mb	v
81.7-91.7	f(B6xCAST)-cM	0.117413	0.25444	0.153398	0.29499	0.225481	0.28275	0.321159	0.16789		0	0	0	0	0	f(B6xCAST)-cM	w
	f(CASTxB6)-cM	0.0864331	0.40649	0.118414	0.42802	0.13875	0.51657	0.18976	0.41323		0	0	0	0	0	f(CASTxB6)-cM	w
	m(B6xCAST)-cM	0.0668131	0.51829	0.121201	0.41319	0.176235	0.4033	0.29864	0.19978		0	0	0	0	0	m(B6xCAST)-cM	w
	m(CASTxB6)-cM	0.0242701	0.82455	0.0546161	0.72967	0.0666631	0.76116	0.149848	0.49109		0	0	0	0	0	m(CASTxB6)-cM	w
	female-cM	0.105292	0.30916	0.141393	0.3392	0.190604	0.36746	0.256914	0.28312		0	0	0	0	0	female-cM	w
	male-cM	0.0394951	0.71029	0.0818901	0.59415	0.109678	0.61035	0.206945	0.37454		0	0	0	0	0	male-cM	w
	ave-cM	0.0821001	0.43277	0.123159	0.41098	0.168237	0.43202	0.247491	0.29705		0	0	0	0	0	ave-cM	w
81.7-91.7	f(B6xCAST)-cM/Mb	0.117413	0.25351	0.153398	0.29379	0.225481	0.27847	0.321159	0.17011		0	0	0	0	0	f(B6xCAST)-cM/Mb	w
	f(CASTxB6)-cM/Mb	0.0864331	0.40776	0.118414	0.42879	0.13875	0.51915	0.18976	0.41368		0	0	0	0	0	f(CASTxB6)-cM/Mb	w
	m(B6xCAST)-cM/Mb	0.0668131	0.51703	0.121202	0.40983	0.176234	0.40474	0.29864	0.20077		0	0	0	0	0	m(B6xCAST)-cM/Mb	w
	m(CASTxB6)-cM/Mb	0.0242701	0.82443	0.0546161	0.73209	0.0666631	0.75795	0.149848	0.49624		0	0	0	0	0	m(CASTxB6)-cM/Mb	w
	female-cM/Mb	0.105292	0.30963	0.141393	0.33787	0.190604	0.36868	0.256913	0.27852		0	0	0	0	0	female-cM/Mb	w
	male-cM/Mb	0.0394941	0.71059	0.0818901	0.59607	0.109678	0.61429	0.206945	0.37634		0	0	0	0	0	male-cM/Mb	w
	ave-cM/Mb	0.0821001	0.43378	0.123159	0.40727	0.168237	0.43102	0.247491	0.29697		0	0	0	0	0	ave-cM/Mb	w
91.7-101.7	f(B6xCAST)-cM	0.103201	0.31214	0.144591	0.32385	0.132119	0.53537	0.0189491	0.93749		0	0	0	0	0	f(B6xCAST)-cM	x
	f(CASTxB6)-cM	0.0721001	0.47985	0.0718801	0.62246	0.0544741	0.79673	-0.110533	0.65114		0	0	0	0	0	f(CASTxB6)-cM	x
	m(B6xCAST)-cM	0.209085	0.0348001	0.316488	0.0220401	0.430661	0.0289901	0.414938	0.0618301		111111	111111	111111	0	333333	m(B6xCAST)-cM	x
	m(CASTxB6)-cM	0.226485	0.0198801	0.287079	0.0380701	0.40674	0.0362001	0.326681	0.14421		111111	111111	111111	0	333333	m(CASTxB6)-cM	x
	female-cM	0.0919901	0.37018	0.113953	0.4358	0.104101	0.62522	-0.0396491	0.87289		0	0	0	0	0	female-cM	x
	male-cM	0.229946	0.0182801	0.317392	0.0219501	0.443547	0.0219201	0.386712	0.0768401		111111	111111	111111	0	333333	male-cM	x
	ave-cM	0.186462	0.0626501	0.249965	0.0780201	0.32996	0.10621	0.213464	0.3618		0	0	0	0	0	ave-cM	x
91.7-101.7	f(B6xCAST)-cM/Mb	0.103201	0.31269	0.144591	0.32376	0.132119	0.53598	0.0189491	0.9372		0	0	0	0	0	f(B6xCAST)-cM/Mb	x
	f(CASTxB6)-cM/Mb	0.0721001	0.48426	0.0718791	0.62446	0.0544741	0.7949	-0.110534	0.64956		0	0	0	0	0	f(CASTxB6)-cM/Mb	x
	m(B6xCAST)-cM/Mb	0.209085	0.0349301	0.316488	0.0224201	0.43066	0.0288401	0.414938	0.0619401		111111	111111	111111	0	333333	m(B6xCAST)-cM/Mb	x
	m(CASTxB6)-cM/Mb	0.226484	0.0208301	0.287079	0.0386001	0.40674	0.0373101	0.326681	0.14295		111111	111111	111111	0	333333	m(CASTxB6)-cM/Mb	x
	female-cM/Mb	0.0919901	0.3693	0.113953	0.43463	0.104101	0.62697	-0.0396491	0.87259		0	0	0	0	0	female-cM/Mb	x
	male-cM/Mb	0.229946	0.0188701	0.317392	0.0217801	0.443547	0.0220601	0.386712	0.0758901		111111	111111	111111	0	333333	male-cM/Mb	x
	ave-cM/Mb	0.186462	0.0620901	0.249965	0.0786001	0.32996	0.10587	0.213464	0.36495		0	0	0	0	0	ave-cM/Mb	x
101.7-111.7	f(B6xCAST)-cM	0.234988	0.0053501	0.298904	0.0199901	0.393729	0.0337701	0.330803	0.15441		111111	111111	111111	0	333333	f(B6xCAST)-cM	y
	f(CASTxB6)-cM	0.281199	0.0033301	0.375853	0.0057001	0.470079	0.0162701	0.242952	0.3006		111111	111111	111111	0	333333	f(CASTxB6)-cM	y
	m(B6xCAST)-cM	0.0757141	0.49012	0.126296	0.40719	0.166466	0.45546	0.0825271	0.74395		0	0	0	0	0	m(B6xCAST)-cM	y
	m(CASTxB6)-cM	0.208708	0.0183801	0.27233	0.0392701	0.351773	0.0643601	0.369264	0.10605		111111	111111	0	0	222222	m(CASTxB6)-cM	y
	female-cM	0.269291	0.0020101	0.346021	0.0077201	0.442879	0.0168301	0.312725	0.17872		111111	111111	111111	0	333333	female-cM	y
	male-cM	0.151609	0.13281	0.211763	0.13786	0.276519	0.18061	0.256608	0.29391		0	0	0	0	0	male-cM	y
	ave-cM	0.190516	0.0413801	0.258037	0.0582801	0.339249	0.0807101	0.286998	0.22681		111111	0	0	0	111111	ave-cM	y
101.7-111.7	f(B6xCAST)-cM/Mb	0.234988	0.0054901	0.298905	0.0211401	0.39373	0.0329801	0.330803	0.15186		111111	111111	111111	0	333333	f(B6xCAST)-cM/Mb	y
	f(CASTxB6)-cM/Mb	0.281199	0.0029201	0.375853	0.0056901	0.470079	0.0162801	0.242952	0.30024		111111	111111	111111	0	333333	f(CASTxB6)-cM/Mb	y
	m(B6xCAST)-cM/Mb	0.0757131	0.49208	0.126296	0.40635	0.166466	0.45679	0.0825271	0.74392		0	0	0	0	0	m(B6xCAST)-cM/Mb	y
	m(CASTxB6)-cM/Mb	0.208708	0.0181201	0.27233	0.0392101	0.351773	0.0650701	0.369264	0.10551		111111	111111	0	0	222222	m(CASTxB6)-cM/Mb	y
	female-cM/Mb	0.269292	0.0021301	0.346021	0.0069601	0.442879	0.0171901	0.312725	0.1797		111111	111111	111111	0	333333	female-cM/Mb	y
	male-cM/Mb	0.151609	0.13254	0.211763	0.13933	0.276519	0.18119	0.256608	0.29223		0	0	0	0	0	male-cM/Mb	y
	ave-cM/Mb	0.190516	0.0406301	0.258037	0.0566201	0.339249	0.0781601	0.286998	0.22507		111111	0	0	0	111111	ave-cM/Mb	y
111.7-121.7	f(B6xCAST)-cM	-0.288043	0.0095601	-0.364581	0.0209601	-0.437388	0.0461401	-0.0927951	0.57606		111111	111111	111111	0	333333	f(B6xCAST)-cM	z
	f(CASTxB6)-cM	-0.347316	0.0019501	-0.488311	0.0018401	-0.617834	0.0060501	-0.169606	0.23004		111111	111111	111111	0	333333	f(CASTxB6)-cM	z
	m(B6xCAST)-cM	0.0196711	0.84625	-0.0347121	0.81461	-0.0699121	0.73778	0.198866	0.41182		0	0	0	0	0	m(B6xCAST)-cM	z
	m(CASTxB6)-cM	-0.0741481	0.46942	-0.113646	0.43378	-0.173697	0.40906	0.0862451	0.75809		0	0	0	0	0	m(CASTxB6)-cM	z
	female-cM	-0.331905	0.0029001	-0.447703	0.0050201	-0.556908	0.0117201	-0.139326	0.36664		111111	111111	111111	0	333333	female-cM	z
	male-cM	-0.0283881	0.78173	-0.0777041	0.59689	-0.127626	0.54184	0.149134	0.56803		0	0	0	0	0	male-cM	z
	ave-cM	-0.182003	0.0768501	-0.274883	0.0592301	-0.369601	0.0706701	0.0011861	0.99637		0	0	0	0	0	ave-cM	z
111.7-121.7	f(B6xCAST)-cM/Mb	-0.288043	0.0087001	-0.364581	0.0212101	-0.437388	0.0460501	-0.0927951	0.57449		111111	111111	111111	0	333333	f(B6xCAST)-cM/Mb	z
	f(CASTxB6)-cM/Mb	-0.347315	0.0023601	-0.488311	0.0021601	-0.617834	0.0061301	-0.169606	0.2293		111111	111111	111111	0	333333	f(CASTxB6)-cM/Mb	z
	m(B6xCAST)-cM/Mb	0.0196711	0.84778	-0.0347121	0.81356	-0.0699121	0.73535	0.198866	0.41236		0	0	0	0	0	m(B6xCAST)-cM/Mb	z
	m(CASTxB6)-cM/Mb	-0.0741481	0.46686	-0.113646	0.43208	-0.173697	0.40856	0.0862451	0.75584		0	0	0	0	0	m(CASTxB6)-cM/Mb	z
	female-cM/Mb	-0.331904	0.0030601	-0.447703	0.0046501	-0.556908	0.0117601	-0.139326	0.36251		111111	111111	111111	0	333333	female-cM/Mb	z
	male-cM/Mb	-0.0283881	0.78057	-0.0777041	0.59834	-0.127626	0.54231	0.149134	0.56531		0	0	0	0	0	male-cM/Mb	z
	ave-cM/Mb	-0.182003	0.0776601	-0.274883	0.0600001	-0.369601	0.0718001	0.0011861	0.99581		0	0	0	0	0	ave-cM/Mb	z

## Sheet: gene
section (Mbp position)	cross	100.cor	100.sig	200.cor	200.sig	400.cor	400.sig	500.cor	500.sig	111111	100kb	200kb	400kb	500kb	SUM	cross	section
3-13	f(B6xCAST)-cM	-0.0419541	0.68178	-0.131611	0.36813	-0.221799	0.29048	-0.197458	0.40382		0	0	0	0	0	f(B6xCAST)-cM	A
	f(CASTxB6)-cM	-0.0637521	0.54087	-0.144135	0.32688	-0.2005	0.36238	-0.182101	0.44351		0	0	0	0	0	f(CASTxB6)-cM	A
	m(B6xCAST)-cM	-0.0723721	0.4845	-0.100322	0.51308	-0.135337	0.52878	-0.0770291	0.75021		0	0	0	0	0	m(B6xCAST)-cM	A
	m(CASTxB6)-cM	0.0127441	0.90246	-0.0667261	0.65422	-0.152054	0.47327	-0.0810001	0.73177		0	0	0	0	0	m(CASTxB6)-cM	A
	female-cM	-0.0559021	0.58799	-0.141973	0.33018	-0.214022	0.32122	-0.194681	0.41255		0	0	0	0	0	female-cM	A
	male-cM	-0.0348011	0.73419	-0.0896941	0.55424	-0.149618	0.48253	-0.0876051	0.71206		0	0	0	0	0	male-cM	A
	ave-cM	-0.0528861	0.61014	-0.132007	0.36862	-0.205738	0.32902	-0.178106	0.45405		0	0	0	0	0	ave-cM	A
3-13	f(B6xCAST)-cM/Mb	-0.0419541	0.68473	-0.131611	0.36616	-0.221799	0.29153	-0.197459	0.40462		0	0	0	0	0	f(B6xCAST)-cM/Mb	A
	f(CASTxB6)-cM/Mb	-0.0637521	0.54155	-0.144135	0.32627	-0.2005	0.36209	-0.182101	0.4442		0	0	0	0	0	f(CASTxB6)-cM/Mb	A
	m(B6xCAST)-cM/Mb	-0.0723721	0.48319	-0.100322	0.51317	-0.135336	0.52955	-0.0770291	0.75102		0	0	0	0	0	m(B6xCAST)-cM/Mb	A
	m(CASTxB6)-cM/Mb	0.0127441	0.90312	-0.0667261	0.6529	-0.152054	0.47491	-0.0810001	0.73311		0	0	0	0	0	m(CASTxB6)-cM/Mb	A
	female-cM/Mb	-0.0559021	0.58861	-0.141973	0.33253	-0.214023	0.31708	-0.194681	0.41555		0	0	0	0	0	female-cM/Mb	A
	male-cM/Mb	-0.0348011	0.73538	-0.0896951	0.55531	-0.149618	0.48052	-0.0876051	0.71051		0	0	0	0	0	male-cM/Mb	A
	ave-cM/Mb	-0.0528861	0.60808	-0.132007	0.36746	-0.205737	0.32917	-0.178106	0.45181		0	0	0	0	0	ave-cM/Mb	A
13-23	f(B6xCAST)-cM	0.167788	0.0917401	0.138925	0.32359	0.190652	0.36145	0.19194	0.41345		0	0	0	0	0	f(B6xCAST)-cM	B
	f(CASTxB6)-cM	0.168847	0.0807301	0.130939	0.37004	0.148021	0.49379	0.0752851	0.75241		0	0	0	0	0	f(CASTxB6)-cM	B
	m(B6xCAST)-cM	-0.0023831	0.98195	0.0476291	0.75981	-0.0012081	0.99579	0.0507921	0.83815		0	0	0	0	0	m(B6xCAST)-cM	B
	m(CASTxB6)-cM	0.0837781	0.42074	0.117705	0.44358	0.0564731	0.80389	0.0821881	0.73542		0	0	0	0	0	m(CASTxB6)-cM	B
	female-cM	0.169603	0.0859301	0.136102	0.34313	0.170033	0.42323	0.132981	0.57453		0	0	0	0	0	female-cM	B
	male-cM	0.0356141	0.73821	0.0806401	0.60276	0.0239441	0.91853	0.0660471	0.79103		0	0	0	0	0	male-cM	B
	ave-cM	0.121505	0.2077	0.127559	0.39209	0.110055	0.61322	0.116508	0.61725		0	0	0	0	0	ave-cM	B
13-23	f(B6xCAST)-cM/Mb	0.167787	0.0928501	0.138925	0.326	0.190652	0.36379	0.19194	0.41317		0	0	0	0	0	f(B6xCAST)-cM/Mb	B
	f(CASTxB6)-cM/Mb	0.168847	0.0835101	0.13094	0.36938	0.148021	0.49042	0.0752851	0.74974		0	0	0	0	0	f(CASTxB6)-cM/Mb	B
	m(B6xCAST)-cM/Mb	-0.0023831	0.98199	0.0476291	0.76078	-0.0012081	0.99585	0.0507921	0.83416		0	0	0	0	0	m(B6xCAST)-cM/Mb	B
	m(CASTxB6)-cM/Mb	0.0837781	0.42494	0.117705	0.44065	0.0564731	0.80511	0.0821881	0.73338		0	0	0	0	0	m(CASTxB6)-cM/Mb	B
	female-cM/Mb	0.169603	0.0874501	0.136102	0.34336	0.170033	0.42317	0.132981	0.57543		0	0	0	0	0	female-cM/Mb	B
	male-cM/Mb	0.0356141	0.73916	0.0806401	0.60209	0.0239441	0.91732	0.0660471	0.79002		0	0	0	0	0	male-cM/Mb	B
	ave-cM/Mb	0.121505	0.20944	0.127559	0.39165	0.110055	0.61631	0.116507	0.61476		0	0	0	0	0	ave-cM/Mb	B
23-33	f(B6xCAST)-cM	-0.19428	0.0481801	-0.275433	0.0492101	-0.333313	0.0974001	-0.217209	0.36708		111111	111111	0	0	222222	f(B6xCAST)-cM	C
	f(CASTxB6)-cM	-0.138324	0.16484	-0.213945	0.13247	-0.250305	0.23972	-0.190596	0.45556		0	0	0	0	0	f(CASTxB6)-cM	C
	m(B6xCAST)-cM	-0.137786	0.16876	-0.170288	0.24752	-0.163444	0.4463	0.0188771	0.9395		0	0	0	0	0	m(B6xCAST)-cM	C
	m(CASTxB6)-cM	-0.123579	0.22372	-0.182062	0.20877	-0.222801	0.2911	-0.169503	0.48503		0	0	0	0	0	m(CASTxB6)-cM	C
	female-cM	-0.173387	0.0776101	-0.254921	0.0701601	-0.296288	0.15004	-0.208491	0.39771		0	0	0	0	0	female-cM	C
	male-cM	-0.140145	0.16359	-0.187041	0.19917	-0.203882	0.33724	-0.0806641	0.74649		0	0	0	0	0	male-cM	C
	ave-cM	-0.170352	0.0843001	-0.245933	0.0845601	-0.283751	0.17461	-0.168474	0.48244		0	0	0	0	0	ave-cM	C
23-33	f(B6xCAST)-cM/Mb	-0.19428	0.0480201	-0.275433	0.0483801	-0.333313	0.0985001	-0.217209	0.36739		111111	111111	0	0	222222	f(B6xCAST)-cM/Mb	C
	f(CASTxB6)-cM/Mb	-0.138324	0.1656	-0.213945	0.13242	-0.250305	0.24027	-0.190596	0.45395		0	0	0	0	0	f(CASTxB6)-cM/Mb	C
	m(B6xCAST)-cM/Mb	-0.137786	0.16983	-0.170288	0.2446	-0.163444	0.44438	0.0188771	0.93977		0	0	0	0	0	m(B6xCAST)-cM/Mb	C
	m(CASTxB6)-cM/Mb	-0.123579	0.22289	-0.182062	0.20918	-0.222801	0.29108	-0.169502	0.48467		0	0	0	0	0	m(CASTxB6)-cM/Mb	C
	female-cM/Mb	-0.173387	0.0775001	-0.254921	0.0697701	-0.296288	0.14911	-0.208491	0.40292		0	0	0	0	0	female-cM/Mb	C
	male-cM/Mb	-0.140145	0.16597	-0.187041	0.19984	-0.203882	0.33514	-0.0806631	0.74998		0	0	0	0	0	male-cM/Mb	C
	ave-cM/Mb	-0.170353	0.0848901	-0.245933	0.0850101	-0.283752	0.17603	-0.168474	0.48334		0	0	0	0	0	ave-cM/Mb	C
33-43	f(B6xCAST)-cM	0.149832	0.13448	0.250177	0.0731701	0.277612	0.18365	0.266661	0.26258		0	0	0	0	0	f(B6xCAST)-cM	D
	f(CASTxB6)-cM	0.179951	0.0682201	0.288762	0.0375801	0.366238	0.0710101	0.360353	0.12083		0	111111	0	0	111111	f(CASTxB6)-cM	D
	m(B6xCAST)-cM	0.320211	0.0003401	0.415154	0.0021101	0.461242	0.0169801	0.533824	0.0135401		111111	111111	111111	111111	444444	m(B6xCAST)-cM	D
	m(CASTxB6)-cM	0.24907	0.0116001	0.328517	0.0185001	0.389142	0.0568101	0.375694	0.10727		111111	111111	0	0	222222	m(CASTxB6)-cM	D
	female-cM	0.169547	0.0877501	0.275911	0.0459501	0.329301	0.11025	0.31966	0.1716		0	111111	0	0	111111	female-cM	D
	male-cM	0.299102	0.0020301	0.388672	0.0053901	0.447651	0.0245401	0.471104	0.0319101		111111	111111	111111	111111	444444	male-cM	D
	ave-cM	0.234063	0.0160201	0.337284	0.0143101	0.398501	0.0468701	0.408217	0.0728901		111111	111111	111111	0	333333	ave-cM	D
33-43	f(B6xCAST)-cM/Mb	0.149831	0.13478	0.250177	0.0722701	0.277611	0.1825	0.266661	0.26297		0	0	0	0	0	f(B6xCAST)-cM/Mb	D
	f(CASTxB6)-cM/Mb	0.179951	0.0687701	0.288762	0.0383601	0.366238	0.0717401	0.360353	0.11966		0	111111	0	0	111111	f(CASTxB6)-cM/Mb	D
	m(B6xCAST)-cM/Mb	0.320211	0.0003201	0.415154	0.0019201	0.461242	0.0174701	0.533823	0.0134401		111111	111111	111111	111111	444444	m(B6xCAST)-cM/Mb	D
	m(CASTxB6)-cM/Mb	0.249069	0.0112001	0.328517	0.0183801	0.389142	0.0565401	0.375694	0.10636		111111	111111	0	0	222222	m(CASTxB6)-cM/Mb	D
	female-cM/Mb	0.169547	0.0868701	0.275911	0.0460401	0.329301	0.10968	0.31966	0.17364		0	111111	0	0	111111	female-cM/Mb	D
	male-cM/Mb	0.299103	0.0021401	0.388672	0.0046801	0.447652	0.0251901	0.471104	0.0335101		111111	111111	111111	111111	444444	male-cM/Mb	D
	ave-cM/Mb	0.234063	0.0158501	0.337284	0.0151201	0.398501	0.0466101	0.408217	0.0758101		111111	111111	111111	0	333333	ave-cM/Mb	D
43-53	f(B6xCAST)-cM	-0.0846771	0.40812	-0.102089	0.48497	-0.225701	0.28297	-0.0876741	0.71541		0	0	0	0	0	f(B6xCAST)-cM	E
	f(CASTxB6)-cM	-0.126701	0.21411	-0.184802	0.19918	-0.247542	0.23591	-0.295403	0.20565		0	0	0	0	0	f(CASTxB6)-cM	E
	m(B6xCAST)-cM	0.0283371	0.78979	0.0641231	0.66593	0.107692	0.61808	0.11964	0.61984		0	0	0	0	0	m(B6xCAST)-cM	E
	m(CASTxB6)-cM	0.0155371	0.88296	0.0375091	0.80033	0.0843741	0.70211	0.0568421	0.81605		0	0	0	0	0	m(CASTxB6)-cM	E
	female-cM	-0.117311	0.24852	-0.160238	0.26537	-0.259208	0.2139	-0.208818	0.38095		0	0	0	0	0	female-cM	E
	male-cM	0.0217911	0.83621	0.0504331	0.73426	0.0957171	0.66069	0.0872851	0.72006		0	0	0	0	0	male-cM	E
	ave-cM	-0.0254831	0.8084	-0.0169431	0.9105	-0.0147541	0.94541	-0.0045751	0.98475		0	0	0	0	0	ave-cM	E
43-53	f(B6xCAST)-cM/Mb	-0.0846771	0.40771	-0.102089	0.48503	-0.2257	0.28543	-0.0876731	0.7192		0	0	0	0	0	f(B6xCAST)-cM/Mb	E
	f(CASTxB6)-cM/Mb	-0.126701	0.21534	-0.184802	0.20383	-0.247541	0.23569	-0.295403	0.20658		0	0	0	0	0	f(CASTxB6)-cM/Mb	E
	m(B6xCAST)-cM/Mb	0.0283371	0.78856	0.0641231	0.66529	0.107692	0.61626	0.11964	0.61812		0	0	0	0	0	m(B6xCAST)-cM/Mb	E
	m(CASTxB6)-cM/Mb	0.0155371	0.88217	0.0375091	0.80102	0.0843741	0.70107	0.0568421	0.81296		0	0	0	0	0	m(CASTxB6)-cM/Mb	E
	female-cM/Mb	-0.117311	0.25081	-0.160238	0.26927	-0.259208	0.21269	-0.208818	0.37848		0	0	0	0	0	female-cM/Mb	E
	male-cM/Mb	0.0217911	0.83809	0.0504331	0.73494	0.0957171	0.65704	0.0872851	0.71936		0	0	0	0	0	male-cM/Mb	E
	ave-cM/Mb	-0.0254831	0.80682	-0.0169431	0.9085	-0.0147541	0.94542	-0.0045751	0.98548		0	0	0	0	0	ave-cM/Mb	E
53-63	f(B6xCAST)-cM	-0.284927	0.0032201	-0.346761	0.0123201	-0.366726	0.0712401	-0.365437	0.11316		111111	111111	0	0	222222	f(B6xCAST)-cM	F
	f(CASTxB6)-cM	-0.232274	0.0071901	-0.343014	0.0087701	-0.385608	0.0596401	-0.440996	0.0534501		111111	111111	0	0	222222	f(CASTxB6)-cM	F
	m(B6xCAST)-cM	-0.0598321	0.57588	-0.0681301	0.65116	0.0719651	0.7351	0.0617111	0.80541		0	0	0	0	0	m(B6xCAST)-cM	F
	m(CASTxB6)-cM	-0.0202031	0.84802	0.0084781	0.95405	0.216763	0.29911	0.261028	0.27058		0	0	0	0	0	m(CASTxB6)-cM	F
	female-cM	-0.268984	0.0021201	-0.362705	0.0057601	-0.403307	0.0464301	-0.438904	0.0540401		111111	111111	111111	0	333333	female-cM	F
	male-cM	-0.0373301	0.72414	-0.0224151	0.88021	0.165585	0.43283	0.181894	0.45351		0	0	0	0	0	male-cM	F
	ave-cM	-0.113246	0.27742	-0.133267	0.36539	0.0037511	0.98633	-0.0040241	0.98626		0	0	0	0	0	ave-cM	F
53-63	f(B6xCAST)-cM/Mb	-0.284927	0.0029301	-0.346761	0.0129101	-0.366726	0.0718901	-0.365438	0.11405		111111	111111	0	0	222222	f(B6xCAST)-cM/Mb	F
	f(CASTxB6)-cM/Mb	-0.232274	0.0071601	-0.343015	0.0087801	-0.385608	0.0598201	-0.440996	0.0538601		111111	111111	0	0	222222	f(CASTxB6)-cM/Mb	F
	m(B6xCAST)-cM/Mb	-0.0598311	0.5783	-0.0681311	0.64953	0.0719641	0.73625	0.0617121	0.80445		0	0	0	0	0	m(B6xCAST)-cM/Mb	F
	m(CASTxB6)-cM/Mb	-0.0202041	0.84844	0.0084781	0.95461	0.216763	0.29772	0.261028	0.27124		0	0	0	0	0	m(CASTxB6)-cM/Mb	F
	female-cM/Mb	-0.268984	0.0020901	-0.362705	0.0059401	-0.403306	0.0458601	-0.438904	0.0530901		111111	111111	111111	0	333333	female-cM/Mb	F
	male-cM/Mb	-0.0373301	0.72371	-0.0224151	0.88061	0.165585	0.432	0.181894	0.45236		0	0	0	0	0	male-cM/Mb	F
	ave-cM/Mb	-0.113246	0.27407	-0.133267	0.36373	0.0037511	0.98578	-0.0040241	0.98713		0	0	0	0	0	ave-cM/Mb	F
63-73	f(B6xCAST)-cM	0.0234161	0.82197	0.128632	0.3792	0.0879991	0.67946	0.214405	0.36944		0	0	0	0	0	f(B6xCAST)-cM	G
	f(CASTxB6)-cM	0.0135781	0.89486	0.166953	0.25073	0.149308	0.47447	0.367566	0.11155		0	0	0	0	0	f(CASTxB6)-cM	G
	m(B6xCAST)-cM	0.0093451	0.92902	0.141636	0.33465	0.0332121	0.87681	0.369811	0.10754		0	0	0	0	0	m(B6xCAST)-cM	G
	m(CASTxB6)-cM	-0.11418	0.26744	0.0273581	0.85249	-0.0641181	0.76005	0.251942	0.28756		0	0	0	0	0	m(CASTxB6)-cM	G
	female-cM	0.0200771	0.8474	0.160684	0.2704	0.126583	0.54752	0.309225	0.18764		0	0	0	0	0	female-cM	G
	male-cM	-0.0510411	0.62488	0.0959501	0.51599	-0.0128331	0.95244	0.337917	0.1448		0	0	0	0	0	male-cM	G
	ave-cM	-0.0091881	0.92926	0.143334	0.3245	0.0751411	0.72088	0.345221	0.13645		0	0	0	0	0	ave-cM	G
63-73	f(B6xCAST)-cM/Mb	0.0234161	0.82032	0.128632	0.37836	0.0879991	0.6756	0.214405	0.36692		0	0	0	0	0	f(B6xCAST)-cM/Mb	G
	f(CASTxB6)-cM/Mb	0.0135781	0.89609	0.166954	0.25239	0.149308	0.47652	0.367566	0.11038		0	0	0	0	0	f(CASTxB6)-cM/Mb	G
	m(B6xCAST)-cM/Mb	0.0093451	0.92935	0.141637	0.33287	0.0332121	0.87373	0.369811	0.10705		0	0	0	0	0	m(B6xCAST)-cM/Mb	G
	m(CASTxB6)-cM/Mb	-0.11418	0.26646	0.0273581	0.85443	-0.0641181	0.75953	0.251941	0.28694		0	0	0	0	0	m(CASTxB6)-cM/Mb	G
	female-cM/Mb	0.0200771	0.84495	0.160684	0.27119	0.126582	0.54541	0.309225	0.18853		0	0	0	0	0	female-cM/Mb	G
	male-cM/Mb	-0.0510421	0.6242	0.0959501	0.51701	-0.0128331	0.95163	0.337917	0.1455		0	0	0	0	0	male-cM/Mb	G
	ave-cM/Mb	-0.0091891	0.92784	0.143334	0.32503	0.0751421	0.72165	0.345222	0.13741		0	0	0	0	0	ave-cM/Mb	G
73-83	f(B6xCAST)-cM	0.110551	0.29845	0.143969	0.34013	0.0810931	0.71702	0.283525	0.22072		0	0	0	0	0	f(B6xCAST)-cM	H
	f(CASTxB6)-cM	0.0771501	0.45168	0.0683891	0.63868	0.0077351	0.97253	0.0969971	0.68221		0	0	0	0	0	f(CASTxB6)-cM	H
	m(B6xCAST)-cM	0.0065811	0.95247	-0.0710601	0.63611	-0.220909	0.28971	-0.218861	0.3508		0	0	0	0	0	m(B6xCAST)-cM	H
	m(CASTxB6)-cM	0.0641421	0.55886	0.0017011	0.99124	-0.133159	0.54065	-0.0565241	0.81727		0	0	0	0	0	m(CASTxB6)-cM	H
	female-cM	0.106404	0.31397	0.12187	0.41202	0.0489051	0.82674	0.216959	0.35632		0	0	0	0	0	female-cM	H
	male-cM	0.0359631	0.74607	-0.0372821	0.80813	-0.184952	0.38602	-0.140361	0.55815		0	0	0	0	0	male-cM	H
	ave-cM	0.0905541	0.37896	0.0660891	0.65147	-0.0580811	0.78819	0.0782411	0.74457		0	0	0	0	0	ave-cM	H
73-83	f(B6xCAST)-cM/Mb	0.110551	0.30072	0.143969	0.34296	0.0810931	0.71857	0.283525	0.22135		0	0	0	0	0	f(B6xCAST)-cM/Mb	H
	f(CASTxB6)-cM/Mb	0.0771501	0.45026	0.0683891	0.63764	0.0077351	0.97132	0.0969981	0.68617		0	0	0	0	0	f(CASTxB6)-cM/Mb	H
	m(B6xCAST)-cM/Mb	0.0065811	0.95161	-0.0710591	0.63444	-0.220909	0.28943	-0.218861	0.35056		0	0	0	0	0	m(B6xCAST)-cM/Mb	H
	m(CASTxB6)-cM/Mb	0.0641421	0.55842	0.0017011	0.99138	-0.133159	0.54043	-0.0565241	0.81485		0	0	0	0	0	m(CASTxB6)-cM/Mb	H
	female-cM/Mb	0.106405	0.31232	0.12187	0.41512	0.0489051	0.82782	0.216959	0.35401		0	0	0	0	0	female-cM/Mb	H
	male-cM/Mb	0.0359621	0.74811	-0.0372831	0.80838	-0.184953	0.38465	-0.140361	0.55755		0	0	0	0	0	male-cM/Mb	H
	ave-cM/Mb	0.0905541	0.37818	0.0660891	0.64994	-0.0580801	0.7863	0.0782421	0.74335		0	0	0	0	0	ave-cM/Mb	H
83-93	f(B6xCAST)-cM	-0.1706	0.0876001	-0.159328	0.27635	-0.180706	0.3877	-0.210922	0.37611		0	0	0	0	0	f(B6xCAST)-cM	I
	f(CASTxB6)-cM	-0.236208	0.0117501	-0.231403	0.10583	-0.358029	0.0782801	-0.298903	0.2042		111111	0	0	0	111111	f(CASTxB6)-cM	I
	m(B6xCAST)-cM	-0.150827	0.13683	-0.129702	0.38028	-0.105676	0.6252	-0.0442431	0.85266		0	0	0	0	0	m(B6xCAST)-cM	I
	m(CASTxB6)-cM	-0.140675	0.16395	-0.174348	0.23759	-0.254215	0.23237	-0.191847	0.48892		0	0	0	0	0	m(CASTxB6)-cM	I
	female-cM	-0.210388	0.0286701	-0.203289	0.1587	-0.283057	0.17237	-0.268453	0.26561		111111	0	0	0	111111	female-cM	I
	male-cM	-0.149124	0.13833	-0.165502	0.26218	-0.21052	0.32837	-0.15074	0.58169		0	0	0	0	0	male-cM	I
	ave-cM	-0.19586	0.0430601	-0.198723	0.17212	-0.271051	0.19358	-0.232612	0.35409		111111	0	0	0	111111	ave-cM	I
83-93	f(B6xCAST)-cM/Mb	-0.1706	0.0877601	-0.159328	0.27148	-0.180706	0.39207	-0.210922	0.37493		0	0	0	0	0	f(B6xCAST)-cM/Mb	I
	f(CASTxB6)-cM/Mb	-0.236208	0.0118301	-0.231403	0.10489	-0.358028	0.0787101	-0.298903	0.20222		111111	0	0	0	111111	f(CASTxB6)-cM/Mb	I
	m(B6xCAST)-cM/Mb	-0.150827	0.13619	-0.129702	0.37945	-0.105676	0.62192	-0.0442431	0.85322		0	0	0	0	0	m(B6xCAST)-cM/Mb	I
	m(CASTxB6)-cM/Mb	-0.140675	0.16546	-0.174348	0.23623	-0.254215	0.23324	-0.191847	0.4919		0	0	0	0	0	m(CASTxB6)-cM/Mb	I
	female-cM/Mb	-0.210388	0.0291101	-0.203289	0.15752	-0.283057	0.17044	-0.268453	0.26745		111111	0	0	0	111111	female-cM/Mb	I
	male-cM/Mb	-0.149124	0.13722	-0.165503	0.26109	-0.21052	0.33046	-0.15074	0.57948		0	0	0	0	0	male-cM/Mb	I
	ave-cM/Mb	-0.19586	0.0426601	-0.198723	0.16965	-0.271051	0.19237	-0.232612	0.3547		111111	0	0	0	111111	ave-cM/Mb	I
93-103	f(B6xCAST)-cM	-0.0550651	0.58733	-0.0567221	0.69496	0.0177781	0.93313	-0.0337071	0.88739		0	0	0	0	0	f(B6xCAST)-cM	J
	f(CASTxB6)-cM	-0.0857341	0.40075	-0.0384031	0.79073	-0.0354251	0.86729	-0.0425341	0.86056		0	0	0	0	0	f(CASTxB6)-cM	J
	m(B6xCAST)-cM	-0.0959581	0.34472	-0.0560201	0.69759	-0.0339911	0.87079	0.0549341	0.81307		0	0	0	0	0	m(B6xCAST)-cM	J
	m(CASTxB6)-cM	-0.10418	0.30598	0.0053681	0.9712	0.0728941	0.72467	0.107502	0.64336		0	0	0	0	0	m(CASTxB6)-cM	J
	female-cM	-0.0755511	0.4582	-0.0505821	0.72789	-0.0069691	0.97337	-0.0390751	0.87029		0	0	0	0	0	female-cM	J
	male-cM	-0.106074	0.29531	-0.0237691	0.8677	0.0268241	0.89878	0.0916371	0.69306		0	0	0	0	0	male-cM	J
	ave-cM	-0.103235	0.31029	-0.0432851	0.76288	0.0117881	0.95445	0.0309811	0.8972		0	0	0	0	0	ave-cM	J
93-103	f(B6xCAST)-cM/Mb	-0.0550651	0.58819	-0.0567221	0.69777	0.0177781	0.93202	-0.0337071	0.88794		0	0	0	0	0	f(B6xCAST)-cM/Mb	J
	f(CASTxB6)-cM/Mb	-0.0857341	0.40291	-0.0384031	0.79003	-0.0354251	0.8679	-0.0425351	0.85917		0	0	0	0	0	f(CASTxB6)-cM/Mb	J
	m(B6xCAST)-cM/Mb	-0.0959581	0.34712	-0.0560211	0.69338	-0.0339911	0.87012	0.0549351	0.8162		0	0	0	0	0	m(B6xCAST)-cM/Mb	J
	m(CASTxB6)-cM/Mb	-0.104179	0.30504	0.0053681	0.96982	0.0728941	0.72796	0.107502	0.63838		0	0	0	0	0	m(CASTxB6)-cM/Mb	J
	female-cM/Mb	-0.0755511	0.46103	-0.0505821	0.72572	-0.0069691	0.97328	-0.0390751	0.87038		0	0	0	0	0	female-cM/Mb	J
	male-cM/Mb	-0.106074	0.2963	-0.0237691	0.86641	0.0268251	0.89819	0.0916371	0.69358		0	0	0	0	0	male-cM/Mb	J
	ave-cM/Mb	-0.103235	0.30844	-0.0432851	0.76427	0.0117881	0.95551	0.0309811	0.89705		0	0	0	0	0	ave-cM/Mb	J
103-113	f(B6xCAST)-cM	-0.15405	0.1351	-0.242327	0.0904901	-0.264837	0.21395	-0.291408	0.22257		0	0	0	0	0	f(B6xCAST)-cM	K
	f(CASTxB6)-cM	-0.204537	0.0321801	-0.293237	0.0328301	-0.335521	0.11396	-0.358319	0.12257		111111	111111	0	0	222222	f(CASTxB6)-cM	K
	m(B6xCAST)-cM	-0.117679	0.25909	-0.197748	0.17722	-0.157847	0.46198	-0.174134	0.46607		0	0	0	0	0	m(B6xCAST)-cM	K
	m(CASTxB6)-cM	-0.0171551	0.87931	-0.0743511	0.63867	-0.0366511	0.87039	-0.0027751	0.99085		0	0	0	0	0	m(CASTxB6)-cM	K
	female-cM	-0.191329	0.0517701	-0.283357	0.0411501	-0.317262	0.13515	-0.337071	0.15957		0	111111	0	0	111111	female-cM	K
	male-cM	-0.0663161	0.54675	-0.138722	0.36093	-0.0988561	0.65412	-0.0811501	0.73638		0	0	0	0	0	male-cM	K
	ave-cM	-0.128106	0.21687	-0.217865	0.1336	-0.217243	0.30791	-0.219513	0.37114		0	0	0	0	0	ave-cM	K
103-113	f(B6xCAST)-cM/Mb	-0.154049	0.13667	-0.242327	0.0927501	-0.264837	0.21754	-0.291408	0.22424		0	0	0	0	0	f(B6xCAST)-cM/Mb	K
	f(CASTxB6)-cM/Mb	-0.204537	0.0321901	-0.293237	0.0331701	-0.335521	0.11265	-0.358319	0.12326		111111	111111	0	0	222222	f(CASTxB6)-cM/Mb	K
	m(B6xCAST)-cM/Mb	-0.117679	0.26326	-0.197748	0.17658	-0.157847	0.45967	-0.174134	0.46909		0	0	0	0	0	m(B6xCAST)-cM/Mb	K
	m(CASTxB6)-cM/Mb	-0.0171551	0.87814	-0.0743511	0.63717	-0.0366511	0.86993	-0.0027751	0.9911		0	0	0	0	0	m(CASTxB6)-cM/Mb	K
	female-cM/Mb	-0.191329	0.0519901	-0.283357	0.0417701	-0.317262	0.13292	-0.337071	0.16055		0	111111	0	0	111111	female-cM/Mb	K
	male-cM/Mb	-0.0663161	0.54238	-0.138722	0.36123	-0.0988561	0.65274	-0.0811501	0.73885		0	0	0	0	0	male-cM/Mb	K
	ave-cM/Mb	-0.128106	0.21793	-0.217865	0.13292	-0.217243	0.30554	-0.219513	0.36889		0	0	0	0	0	ave-cM/Mb	K
113-121.7	f(B6xCAST)-cM	-0.156856	0.14799	-0.189246	0.22224	-0.0946011	0.67865	-0.0472301	0.85041		0	0	0	0	0	f(B6xCAST)-cM	L
	f(CASTxB6)-cM	-0.191324	0.0729601	-0.270024	0.0758401	-0.235169	0.3007	-0.100287	0.69893		0	0	0	0	0	f(CASTxB6)-cM	L
	m(B6xCAST)-cM	-0.0890791	0.41276	-0.2335	0.12653	-0.225292	0.31433	0.0010351	0.99674		0	0	0	0	0	m(B6xCAST)-cM	L
	m(CASTxB6)-cM	-0.132806	0.22004	-0.21687	0.15931	-0.299388	0.1779	-0.223009	0.37811		0	0	0	0	0	m(CASTxB6)-cM	L
	female-cM	-0.180991	0.0914401	-0.239088	0.1197	-0.175099	0.44156	-0.0792861	0.75516		0	0	0	0	0	female-cM	L
	male-cM	-0.114292	0.29121	-0.235333	0.12497	-0.274041	0.22084	-0.114674	0.64761		0	0	0	0	0	male-cM	L
	ave-cM	-0.14406	0.18472	-0.246956	0.10619	-0.249891	0.26517	-0.106739	0.67575		0	0	0	0	0	ave-cM	L
113-121.7	f(B6xCAST)-cM/Mb	-0.156857	0.14791	-0.189246	0.22594	-0.0946011	0.67785	-0.0472301	0.84981		0	0	0	0	0	f(B6xCAST)-cM/Mb	L
	f(CASTxB6)-cM/Mb	-0.191324	0.0747801	-0.270024	0.0764501	-0.235169	0.29868	-0.100287	0.70062		0	0	0	0	0	f(CASTxB6)-cM/Mb	L
	m(B6xCAST)-cM/Mb	-0.0890791	0.41544	-0.2335	0.1269	-0.225292	0.31918	0.0010351	0.99661		0	0	0	0	0	m(B6xCAST)-cM/Mb	L
	m(CASTxB6)-cM/Mb	-0.132806	0.22179	-0.21687	0.16164	-0.299388	0.17942	-0.223009	0.37693		0	0	0	0	0	m(CASTxB6)-cM/Mb	L
	female-cM/Mb	-0.180991	0.0897501	-0.239088	0.12001	-0.175099	0.44149	-0.0792861	0.75315		0	0	0	0	0	female-cM/Mb	L
	male-cM/Mb	-0.114292	0.29412	-0.235333	0.12403	-0.274041	0.21999	-0.114674	0.65212		0	0	0	0	0	male-cM/Mb	L
	ave-cM/Mb	-0.14406	0.18159	-0.246956	0.10736	-0.249891	0.2631	-0.106739	0.6775		0	0	0	0	0	ave-cM/Mb	L
3-11.7	f(B6xCAST)-cM	-0.132301	0.22315	-0.228512	0.1379	-0.313669	0.15428	-0.286127	0.25251		0	0	0	0	0	f(B6xCAST)-cM	o
	f(CASTxB6)-cM	-0.143582	0.19009	-0.222639	0.15226	-0.265064	0.24478	-0.258361	0.3053		0	0	0	0	0	f(CASTxB6)-cM	o
	m(B6xCAST)-cM	-0.128953	0.23707	-0.173563	0.27721	-0.216543	0.34732	-0.190313	0.46251		0	0	0	0	0	m(B6xCAST)-cM	o
	m(CASTxB6)-cM	-0.10138	0.36398	-0.177419	0.25971	-0.274766	0.22167	-0.193669	0.44249		0	0	0	0	0	m(CASTxB6)-cM	o
	female-cM	-0.143602	0.189	-0.231288	0.13437	-0.29157	0.19002	-0.279947	0.26385		0	0	0	0	0	female-cM	o
	male-cM	-0.128658	0.23717	-0.184962	0.24574	-0.254095	0.26428	-0.216369	0.38476		0	0	0	0	0	male-cM	o
	ave-cM	-0.148711	0.17238	-0.229723	0.13595	-0.298797	0.17824	-0.281106	0.25498		0	0	0	0	0	ave-cM	o
3-11.7	f(B6xCAST)-cM/Mb	-0.132301	0.22218	-0.228512	0.13631	-0.313669	0.15556	-0.286127	0.25129		0	0	0	0	0	f(B6xCAST)-cM/Mb	o
	f(CASTxB6)-cM/Mb	-0.143582	0.19146	-0.222639	0.1506	-0.265064	0.24569	-0.258361	0.30596		0	0	0	0	0	f(CASTxB6)-cM/Mb	o
	m(B6xCAST)-cM/Mb	-0.128953	0.23937	-0.173564	0.27844	-0.216543	0.34969	-0.190313	0.46325		0	0	0	0	0	m(B6xCAST)-cM/Mb	o
	m(CASTxB6)-cM/Mb	-0.10138	0.36264	-0.177419	0.26197	-0.274766	0.21901	-0.193669	0.44306		0	0	0	0	0	m(CASTxB6)-cM/Mb	o
	female-cM/Mb	-0.143602	0.18967	-0.231288	0.13623	-0.291571	0.18874	-0.279947	0.26499		0	0	0	0	0	female-cM/Mb	o
	male-cM/Mb	-0.128658	0.23775	-0.184962	0.24367	-0.254096	0.26476	-0.216369	0.38467		0	0	0	0	0	male-cM/Mb	o
	ave-cM/Mb	-0.148711	0.17118	-0.229723	0.13684	-0.298797	0.18068	-0.281106	0.26289		0	0	0	0	0	ave-cM/Mb	o
11.7-21.7	f(B6xCAST)-cM	0.245046	0.0216801	0.227132	0.0970701	0.314673	0.11296	0.229179	0.32509		111111	0	0	0	111111	f(B6xCAST)-cM	p
	f(CASTxB6)-cM	0.233288	0.0255901	0.209146	0.13283	0.24504	0.23471	0.116592	0.62885		111111	0	0	0	111111	f(CASTxB6)-cM	p
	m(B6xCAST)-cM	0.0058851	0.95975	0.0506861	0.75403	0.0021901	0.99523	0.0819631	0.78515		0	0	0	0	0	m(B6xCAST)-cM	p
	m(CASTxB6)-cM	0.162483	0.0844201	0.186729	0.17107	0.134845	0.5374	0.141047	0.57275		0	0	0	0	0	m(CASTxB6)-cM	p
	female-cM	0.240543	0.0233801	0.21981	0.10844	0.281201	0.16247	0.172783	0.46404		111111	0	0	0	111111	female-cM	p
	male-cM	0.0765441	0.45796	0.114746	0.44893	0.0612021	0.80932	0.109897	0.68706		0	0	0	0	0	male-cM	p
	ave-cM	0.18818	0.0494601	0.196375	0.15575	0.194061	0.35456	0.166181	0.48405		111111	0	0	0	111111	ave-cM	p
11.7-21.7	f(B6xCAST)-cM/Mb	0.245046	0.0228001	0.227132	0.0965701	0.314673	0.113	0.229179	0.32071		111111	0	0	0	111111	f(B6xCAST)-cM/Mb	p
	f(CASTxB6)-cM/Mb	0.233288	0.0250901	0.209146	0.13072	0.24504	0.23181	0.116592	0.62736		111111	0	0	0	111111	f(CASTxB6)-cM/Mb	p
	m(B6xCAST)-cM/Mb	0.0058851	0.95905	0.0506861	0.75301	0.0021911	0.99487	0.0819631	0.78704		0	0	0	0	0	m(B6xCAST)-cM/Mb	p
	m(CASTxB6)-cM/Mb	0.162483	0.0858801	0.186729	0.17452	0.134845	0.53793	0.141047	0.5718		0	0	0	0	0	m(CASTxB6)-cM/Mb	p
	female-cM/Mb	0.240543	0.0233501	0.21981	0.10909	0.281201	0.1635	0.172783	0.46985		111111	0	0	0	111111	female-cM/Mb	p
	male-cM/Mb	0.0765441	0.45978	0.114746	0.44557	0.0612021	0.814	0.109897	0.68625		0	0	0	0	0	male-cM/Mb	p
	ave-cM/Mb	0.18818	0.0504201	0.196376	0.15714	0.194061	0.3601	0.166181	0.48325		0	0	0	0	0	ave-cM/Mb	p
21.7-31.7	f(B6xCAST)-cM	-0.211163	0.0310301	-0.288325	0.0398601	-0.369386	0.0624101	-0.22125	0.35904		111111	111111	0	0	222222	f(B6xCAST)-cM	q
	f(CASTxB6)-cM	-0.152777	0.11241	-0.245058	0.0768601	-0.301455	0.13292	-0.249978	0.31388		0	0	0	0	0	f(CASTxB6)-cM	q
	m(B6xCAST)-cM	-0.105507	0.30311	-0.0750771	0.61155	-0.119618	0.58657	-0.0498361	0.84102		0	0	0	0	0	m(B6xCAST)-cM	q
	m(CASTxB6)-cM	-0.170967	0.0819901	-0.213741	0.13467	-0.337007	0.0941601	-0.325998	0.15553		0	0	0	0	0	m(CASTxB6)-cM	q
	female-cM	-0.190299	0.0498901	-0.278285	0.0459701	-0.341262	0.0799401	-0.243596	0.32449		111111	111111	0	0	222222	female-cM	q
	male-cM	-0.151908	0.12999	-0.155748	0.28477	-0.243531	0.24588	-0.198689	0.40026		0	0	0	0	0	male-cM	q
	ave-cM	-0.190251	0.0516101	-0.253946	0.0719701	-0.34501	0.0857901	-0.257872	0.28271		0	0	0	0	0	ave-cM	q
21.7-31.7	f(B6xCAST)-cM/Mb	-0.211163	0.0312401	-0.288325	0.0395901	-0.369386	0.0600201	-0.221251	0.35762		111111	111111	0	0	222222	f(B6xCAST)-cM/Mb	q
	f(CASTxB6)-cM/Mb	-0.152776	0.11274	-0.245058	0.0770801	-0.301455	0.13205	-0.249978	0.31407		0	0	0	0	0	f(CASTxB6)-cM/Mb	q
	m(B6xCAST)-cM/Mb	-0.105507	0.30001	-0.0750761	0.61147	-0.119618	0.58692	-0.0498361	0.83922		0	0	0	0	0	m(B6xCAST)-cM/Mb	q
	m(CASTxB6)-cM/Mb	-0.170967	0.0820301	-0.21374	0.1351	-0.337007	0.0949101	-0.325997	0.1612		0	0	0	0	0	m(CASTxB6)-cM/Mb	q
	female-cM/Mb	-0.190299	0.0493301	-0.278285	0.0445001	-0.341262	0.0798501	-0.243596	0.31929		111111	111111	0	0	222222	female-cM/Mb	q
	male-cM/Mb	-0.151909	0.13139	-0.155748	0.28578	-0.243531	0.24771	-0.198688	0.40015		0	0	0	0	0	male-cM/Mb	q
	ave-cM/Mb	-0.190251	0.0515501	-0.253946	0.0722901	-0.34501	0.0849301	-0.257871	0.28474		0	0	0	0	0	ave-cM/Mb	q
31.7-41.7	f(B6xCAST)-cM	0.134899	0.18543	0.223146	0.11499	0.242856	0.25073	0.236151	0.32128		0	0	0	0	0	f(B6xCAST)-cM	r
	f(CASTxB6)-cM	0.161812	0.11024	0.257701	0.0675801	0.333266	0.10456	0.332095	0.15509		0	0	0	0	0	f(CASTxB6)-cM	r
	m(B6xCAST)-cM	0.281442	0.0018401	0.353072	0.0080901	0.404428	0.0406401	0.500623	0.0215801		111111	111111	111111	111111	444444	m(B6xCAST)-cM	r
	m(CASTxB6)-cM	0.225805	0.0209201	0.289931	0.0400001	0.345218	0.0921301	0.34096	0.14241		111111	111111	0	0	222222	m(CASTxB6)-cM	r
	female-cM	0.152696	0.13194	0.246334	0.0792001	0.294526	0.15612	0.289661	0.21714		0	0	0	0	0	female-cM	r
	male-cM	0.266887	0.0044601	0.336973	0.0139001	0.394843	0.0496201	0.436137	0.0544201		111111	111111	111111	0	333333	male-cM	r
	ave-cM	0.210957	0.0291501	0.298649	0.0304001	0.357541	0.0774701	0.378007	0.0989501		111111	111111	0	0	222222	ave-cM	r
31.7-41.7	f(B6xCAST)-cM/Mb	0.134899	0.18623	0.223146	0.11689	0.242856	0.25032	0.236151	0.32252		0	0	0	0	0	f(B6xCAST)-cM/Mb	r
	f(CASTxB6)-cM/Mb	0.161812	0.10667	0.257701	0.0662501	0.333267	0.1046	0.332095	0.15636		0	0	0	0	0	f(CASTxB6)-cM/Mb	r
	m(B6xCAST)-cM/Mb	0.281442	0.0018301	0.353072	0.0079501	0.404428	0.0405101	0.500623	0.0214601		111111	111111	111111	111111	444444	m(B6xCAST)-cM/Mb	r
	m(CASTxB6)-cM/Mb	0.225805	0.0212801	0.289931	0.0392401	0.345218	0.0921901	0.34096	0.13966		111111	111111	0	0	222222	m(CASTxB6)-cM/Mb	r
	female-cM/Mb	0.152696	0.13197	0.246334	0.0798101	0.294526	0.15479	0.289661	0.22139		0	0	0	0	0	female-cM/Mb	r
	male-cM/Mb	0.266887	0.0043301	0.336973	0.0140801	0.394843	0.0496801	0.436137	0.0526001		111111	111111	111111	0	333333	male-cM/Mb	r
	ave-cM/Mb	0.210957	0.0278601	0.298649	0.0299501	0.357541	0.0782001	0.378007	0.10087		111111	111111	0	0	222222	ave-cM/Mb	r
41.7-51.7	f(B6xCAST)-cM	-0.0546271	0.5942	-0.0558311	0.70412	-0.159176	0.45464	-0.0372671	0.87747		0	0	0	0	0	f(B6xCAST)-cM	s
	f(CASTxB6)-cM	-0.0895561	0.38677	-0.138829	0.34227	-0.193462	0.35909	-0.248286	0.2922		0	0	0	0	0	f(CASTxB6)-cM	s
	m(B6xCAST)-cM	0.0150811	0.88524	0.0476951	0.74827	0.0801951	0.70737	0.0832441	0.72697		0	0	0	0	0	m(B6xCAST)-cM	s
	m(CASTxB6)-cM	0.0002131	0.99854	0.0200681	0.89234	0.0593651	0.78503	0.0182521	0.93907		0	0	0	0	0	m(CASTxB6)-cM	s
	female-cM	-0.0795881	0.43743	-0.107935	0.45565	-0.191175	0.36445	-0.153568	0.51847		0	0	0	0	0	female-cM	s
	male-cM	0.0073361	0.94449	0.0333471	0.8227	0.0693951	0.74988	0.0495331	0.83466		0	0	0	0	0	male-cM	s
	ave-cM	-0.0230961	0.82489	-0.0124571	0.93232	-0.0135931	0.95055	-0.0168071	0.94463		0	0	0	0	0	ave-cM	s
41.7-51.7	f(B6xCAST)-cM/Mb	-0.0546271	0.59591	-0.0558311	0.70483	-0.159175	0.45634	-0.0372671	0.87783		0	0	0	0	0	f(B6xCAST)-cM/Mb	s
	f(CASTxB6)-cM/Mb	-0.0895561	0.38534	-0.13883	0.34069	-0.193462	0.35855	-0.248286	0.29215		0	0	0	0	0	f(CASTxB6)-cM/Mb	s
	m(B6xCAST)-cM/Mb	0.0150801	0.88609	0.0476951	0.74868	0.0801951	0.70836	0.0832441	0.72661		0	0	0	0	0	m(B6xCAST)-cM/Mb	s
	m(CASTxB6)-cM/Mb	0.0002131	0.99814	0.0200681	0.89447	0.0593651	0.78641	0.0182521	0.94002		0	0	0	0	0	m(CASTxB6)-cM/Mb	s
	female-cM/Mb	-0.0795881	0.43432	-0.107935	0.45933	-0.191175	0.36322	-0.153568	0.52346		0	0	0	0	0	female-cM/Mb	s
	male-cM/Mb	0.0073361	0.94435	0.0333471	0.82344	0.0693951	0.74683	0.0495331	0.83848		0	0	0	0	0	male-cM/Mb	s
	ave-cM/Mb	-0.0230961	0.82376	-0.0124571	0.93326	-0.0135941	0.95088	-0.0168071	0.94412		0	0	0	0	0	ave-cM/Mb	s
51.7-61.7	f(B6xCAST)-cM	-0.264718	0.0064601	-0.322593	0.0213601	-0.343389	0.0944401	-0.325547	0.16381		111111	111111	0	0	222222	f(B6xCAST)-cM	t
	f(CASTxB6)-cM	-0.205081	0.0267901	-0.280709	0.0436801	-0.281464	0.17642	-0.328297	0.16512		111111	111111	0	0	222222	f(CASTxB6)-cM	t
	m(B6xCAST)-cM	0.0290461	0.78885	0.0517701	0.73041	0.244053	0.24263	0.257202	0.27827		0	0	0	0	0	m(B6xCAST)-cM	t
	m(CASTxB6)-cM	0.0860091	0.40766	0.151907	0.29698	0.4101	0.0396101	0.467777	0.0369601		0	0	111111	111111	222222	m(CASTxB6)-cM	t
	female-cM	-0.242159	0.0079701	-0.314427	0.0227001	-0.330584	0.10964	-0.354286	0.12886		111111	111111	0	0	222222	female-cM	t
	male-cM	0.0661971	0.53121	0.119317	0.41739	0.367272	0.0707801	0.400857	0.0804101		0	0	0	0	0	male-cM	t
	ave-cM	-0.0435351	0.68591	-0.0333471	0.82338	0.141206	0.50327	0.147373	0.53889		0	0	0	0	0	ave-cM	t
51.7-61.7	f(B6xCAST)-cM/Mb	-0.264718	0.0064401	-0.322593	0.0202601	-0.343389	0.0961501	-0.325547	0.16273		111111	111111	0	0	222222	f(B6xCAST)-cM/Mb	t
	f(CASTxB6)-cM/Mb	-0.205081	0.0261901	-0.28071	0.0434801	-0.281464	0.17793	-0.328297	0.16115		111111	111111	0	0	222222	f(CASTxB6)-cM/Mb	t
	m(B6xCAST)-cM/Mb	0.0290461	0.78718	0.0517691	0.72979	0.244053	0.24406	0.257202	0.28077		0	0	0	0	0	m(B6xCAST)-cM/Mb	t
	m(CASTxB6)-cM/Mb	0.0860091	0.4085	0.151907	0.29381	0.4101	0.0411701	0.467777	0.0370201		0	0	111111	111111	222222	m(CASTxB6)-cM/Mb	t
	female-cM/Mb	-0.242159	0.0080801	-0.314427	0.0213401	-0.330584	0.10873	-0.354286	0.12859		111111	111111	0	0	222222	female-cM/Mb	t
	male-cM/Mb	0.0661971	0.52819	0.119317	0.41618	0.367272	0.0679901	0.400857	0.0809001		0	0	0	0	0	male-cM/Mb	t
	ave-cM/Mb	-0.0435351	0.68663	-0.0333471	0.82535	0.141206	0.50563	0.147372	0.54064		0	0	0	0	0	ave-cM/Mb	t
61.7-71.7	f(B6xCAST)-cM	-0.0147131	0.8866	0.0786371	0.59121	0.0624351	0.76934	0.199864	0.40073		0	0	0	0	0	f(B6xCAST)-cM	u
	f(CASTxB6)-cM	-0.0409611	0.69276	0.0709841	0.63312	0.0350511	0.86744	0.318609	0.17268		0	0	0	0	0	f(CASTxB6)-cM	u
	m(B6xCAST)-cM	-0.0215581	0.86033	0.0445531	0.77999	0.0991731	0.64265	0.20783	0.40455		0	0	0	0	0	m(B6xCAST)-cM	u
	m(CASTxB6)-cM	-0.0688741	0.57877	-0.0254721	0.86993	0.0003451	0.99884	0.121979	0.63067		0	0	0	0	0	m(CASTxB6)-cM	u
	female-cM	-0.0293911	0.77609	0.0807041	0.58009	0.0521071	0.80679	0.269393	0.253		0	0	0	0	0	female-cM	u
	male-cM	-0.0475751	0.70072	0.0055961	0.97161	0.0452611	0.83406	0.162796	0.52692		0	0	0	0	0	male-cM	u
	ave-cM	-0.0497941	0.64995	0.0380701	0.8054	0.0595591	0.7805	0.257779	0.27541		0	0	0	0	0	ave-cM	u
61.7-71.7	f(B6xCAST)-cM/Mb	-0.0147131	0.88723	0.0786371	0.58901	0.0624351	0.7692	0.199864	0.39965		0	0	0	0	0	f(B6xCAST)-cM/Mb	u
	f(CASTxB6)-cM/Mb	-0.0409611	0.69337	0.0709851	0.63204	0.0350511	0.87026	0.318608	0.17123		0	0	0	0	0	f(CASTxB6)-cM/Mb	u
	m(B6xCAST)-cM/Mb	-0.0215571	0.86022	0.0445541	0.78133	0.0991731	0.63937	0.20783	0.40679		0	0	0	0	0	m(B6xCAST)-cM/Mb	u
	m(CASTxB6)-cM/Mb	-0.0688741	0.57895	-0.0254721	0.87188	0.0003451	0.99874	0.121979	0.63043		0	0	0	0	0	m(CASTxB6)-cM/Mb	u
	female-cM/Mb	-0.0293911	0.77845	0.0807041	0.57933	0.0521071	0.80633	0.269393	0.2541		0	0	0	0	0	female-cM/Mb	u
	male-cM/Mb	-0.0475751	0.69822	0.0055961	0.97046	0.0452611	0.83182	0.162796	0.52827		0	0	0	0	0	male-cM/Mb	u
	ave-cM/Mb	-0.0497941	0.65192	0.0380701	0.80544	0.0595601	0.78262	0.257779	0.28051		0	0	0	0	0	ave-cM/Mb	u
71.7-81.7	f(B6xCAST)-cM	0.125638	0.22819	0.177119	0.22702	0.102579	0.63466	0.256483	0.26929		0	0	0	0	0	f(B6xCAST)-cM	v
	f(CASTxB6)-cM	0.110578	0.27774	0.147656	0.30785	0.111457	0.60076	0.0420431	0.86107		0	0	0	0	0	f(CASTxB6)-cM	v
	m(B6xCAST)-cM	0.0439431	0.67898	-0.0119451	0.936	-0.228211	0.26965	-0.25062	0.27687		0	0	0	0	0	m(B6xCAST)-cM	v
	m(CASTxB6)-cM	0.0401951	0.71191	-0.0356411	0.81365	-0.201583	0.32902	-0.124899	0.58895		0	0	0	0	0	m(CASTxB6)-cM	v
	female-cM	0.132711	0.19667	0.182641	0.21024	0.111703	0.60288	0.175484	0.46217		0	0	0	0	0	female-cM	v
	male-cM	0.0441491	0.68568	-0.0238361	0.87296	-0.22436	0.28017	-0.198328	0.38532		0	0	0	0	0	male-cM	v
	ave-cM	0.112155	0.27106	0.11226	0.43954	-0.0382071	0.85728	0.0211661	0.92982		0	0	0	0	0	ave-cM	v
71.7-81.7	f(B6xCAST)-cM/Mb	0.125637	0.23049	0.177119	0.22616	0.102579	0.636	0.256483	0.27019		0	0	0	0	0	f(B6xCAST)-cM/Mb	v
	f(CASTxB6)-cM/Mb	0.110578	0.27365	0.147655	0.30999	0.111457	0.6026	0.0420441	0.85981		0	0	0	0	0	f(CASTxB6)-cM/Mb	v
	m(B6xCAST)-cM/Mb	0.0439431	0.6779	-0.0119441	0.93589	-0.228211	0.26853	-0.25062	0.2766		0	0	0	0	0	m(B6xCAST)-cM/Mb	v
	m(CASTxB6)-cM/Mb	0.0401951	0.71207	-0.0356401	0.81182	-0.201583	0.33002	-0.124899	0.59103		0	0	0	0	0	m(CASTxB6)-cM/Mb	v
	female-cM/Mb	0.132711	0.19609	0.182641	0.2085	0.111702	0.60301	0.175483	0.46102		0	0	0	0	0	female-cM/Mb	v
	male-cM/Mb	0.0441481	0.6853	-0.0238371	0.87382	-0.22436	0.27764	-0.198328	0.38884		0	0	0	0	0	male-cM/Mb	v
	ave-cM/Mb	0.112154	0.27449	0.112261	0.44088	-0.0382071	0.8617	0.0211661	0.93141		0	0	0	0	0	ave-cM/Mb	v
81.7-91.7	f(B6xCAST)-cM	-0.179882	0.0685101	-0.213575	0.1403	-0.252644	0.22337	-0.246062	0.30346		0	0	0	0	0	f(B6xCAST)-cM	w
	f(CASTxB6)-cM	-0.252646	0.0057901	-0.298606	0.0320001	-0.434486	0.0264101	-0.317755	0.15826		111111	111111	111111	0	333333	f(CASTxB6)-cM	w
	m(B6xCAST)-cM	-0.199837	0.0436201	-0.20032	0.16517	-0.229434	0.27502	-0.126321	0.60858		111111	0	0	0	111111	m(B6xCAST)-cM	w
	m(CASTxB6)-cM	-0.165203	0.0879401	-0.215225	0.13775	-0.327919	0.10672	-0.243998	0.32985		0	0	0	0	0	m(CASTxB6)-cM	w
	female-cM	-0.223777	0.0181201	-0.266381	0.0598201	-0.361375	0.0749501	-0.295373	0.20909		111111	0	0	0	111111	female-cM	w
	male-cM	-0.182845	0.0556401	-0.219444	0.12557	-0.30628	0.13606	-0.215558	0.3961		0	0	0	0	0	male-cM	w
	ave-cM	-0.217407	0.0208801	-0.260034	0.0639701	-0.358939	0.0760701	-0.275281	0.25239		111111	0	0	0	111111	ave-cM	w
81.7-91.7	f(B6xCAST)-cM/Mb	-0.179882	0.0698101	-0.213575	0.13518	-0.252644	0.2271	-0.246062	0.30018		0	0	0	0	0	f(B6xCAST)-cM/Mb	w
	f(CASTxB6)-cM/Mb	-0.252646	0.0055801	-0.298606	0.0314201	-0.434486	0.0259401	-0.317755	0.16082		111111	111111	111111	0	333333	f(CASTxB6)-cM/Mb	w
	m(B6xCAST)-cM/Mb	-0.199837	0.0431001	-0.200319	0.16576	-0.229434	0.27785	-0.126321	0.60321		111111	0	0	0	111111	m(B6xCAST)-cM/Mb	w
	m(CASTxB6)-cM/Mb	-0.165203	0.0869901	-0.215225	0.13574	-0.327919	0.1056	-0.243998	0.33186		0	0	0	0	0	m(CASTxB6)-cM/Mb	w
	female-cM/Mb	-0.223777	0.0176301	-0.266381	0.0595001	-0.361375	0.0738501	-0.295373	0.20906		111111	0	0	0	111111	female-cM/Mb	w
	male-cM/Mb	-0.182845	0.0575301	-0.219444	0.12598	-0.30628	0.13608	-0.215558	0.39656		0	0	0	0	0	male-cM/Mb	w
	ave-cM/Mb	-0.217407	0.0212401	-0.260034	0.0646601	-0.358939	0.0757201	-0.275281	0.25125		111111	0	0	0	111111	ave-cM/Mb	w
91.7-101.7	f(B6xCAST)-cM	-0.0276361	0.78735	0.0793271	0.58868	0.140699	0.51232	0.0407251	0.86698		0	0	0	0	0	f(B6xCAST)-cM	x
	f(CASTxB6)-cM	-0.0577431	0.57445	0.0724911	0.62049	0.0758381	0.72023	-0.0001371	0.99949		0	0	0	0	0	f(CASTxB6)-cM	x
	m(B6xCAST)-cM	-0.0250031	0.8065	0.0620371	0.66543	0.137136	0.51097	0.199227	0.39586		0	0	0	0	0	m(B6xCAST)-cM	x
	m(CASTxB6)-cM	-0.0302661	0.76495	0.111841	0.43521	0.213791	0.29333	0.206982	0.37021		0	0	0	0	0	m(CASTxB6)-cM	x
	female-cM	-0.0457951	0.65357	0.0804711	0.58243	0.119523	0.57401	0.0235701	0.92197		0	0	0	0	0	female-cM	x
	male-cM	-0.0293021	0.77166	0.0943701	0.51068	0.190821	0.35253	0.216831	0.35015		0	0	0	0	0	male-cM	x
	ave-cM	-0.0423221	0.67663	0.101918	0.48029	0.186228	0.37113	0.146744	0.53633		0	0	0	0	0	ave-cM	x
91.7-101.7	f(B6xCAST)-cM/Mb	-0.0276361	0.78791	0.0793271	0.58742	0.140699	0.50899	0.0407251	0.86655		0	0	0	0	0	f(B6xCAST)-cM/Mb	x
	f(CASTxB6)-cM/Mb	-0.0577431	0.57308	0.0724901	0.62067	0.0758371	0.7208	-0.0001371	0.99961		0	0	0	0	0	f(CASTxB6)-cM/Mb	x
	m(B6xCAST)-cM/Mb	-0.0250031	0.80831	0.0620371	0.66612	0.137136	0.51226	0.199228	0.39741		0	0	0	0	0	m(B6xCAST)-cM/Mb	x
	m(CASTxB6)-cM/Mb	-0.0302661	0.76326	0.111841	0.43379	0.213791	0.29722	0.206982	0.37263		0	0	0	0	0	m(CASTxB6)-cM/Mb	x
	female-cM/Mb	-0.0457951	0.65289	0.0804711	0.58203	0.119523	0.57638	0.0235701	0.92179		0	0	0	0	0	female-cM/Mb	x
	male-cM/Mb	-0.0293021	0.77121	0.0943701	0.50923	0.190821	0.35396	0.216831	0.35181		0	0	0	0	0	male-cM/Mb	x
	ave-cM/Mb	-0.0423221	0.67602	0.101917	0.48014	0.186228	0.37146	0.146744	0.53708		0	0	0	0	0	ave-cM/Mb	x
101.7-111.7	f(B6xCAST)-cM	0.0275751	0.82024	-0.0086831	0.95918	0.109982	0.61603	0.0692991	0.77271		0	0	0	0	0	f(B6xCAST)-cM	y
	f(CASTxB6)-cM	-0.0002191	0.99843	0.0697681	0.63457	0.259621	0.21046	0.0267791	0.91199		0	0	0	0	0	f(CASTxB6)-cM	y
	m(B6xCAST)-cM	0.0034131	0.97744	-0.0242091	0.88183	0.14766	0.49771	0.123233	0.61636		0	0	0	0	0	m(B6xCAST)-cM	y
	m(CASTxB6)-cM	0.0976011	0.39506	0.0930351	0.57795	0.242968	0.26234	0.302073	0.20037		0	0	0	0	0	m(CASTxB6)-cM	y
	female-cM	0.0184011	0.87281	0.0211301	0.89633	0.173765	0.42228	0.0554651	0.81976		0	0	0	0	0	female-cM	y
	male-cM	0.0555881	0.64714	0.0401321	0.81192	0.206813	0.34866	0.235067	0.32658		0	0	0	0	0	male-cM	y
	ave-cM	0.0447251	0.70621	0.0347431	0.83654	0.201018	0.35879	0.181523	0.44567		0	0	0	0	0	ave-cM	y
101.7-111.7	f(B6xCAST)-cM/Mb	0.0275751	0.82202	-0.0086831	0.95733	0.109982	0.62222	0.0692991	0.77312		0	0	0	0	0	f(B6xCAST)-cM/Mb	y
	f(CASTxB6)-cM/Mb	-0.0002201	0.9983	0.0697681	0.63583	0.25962	0.20902	0.0267791	0.91266		0	0	0	0	0	f(CASTxB6)-cM/Mb	y
	m(B6xCAST)-cM/Mb	0.0034131	0.97736	-0.0242091	0.88171	0.14766	0.49933	0.123233	0.61652		0	0	0	0	0	m(B6xCAST)-cM/Mb	y
	m(CASTxB6)-cM/Mb	0.0976011	0.39394	0.0930351	0.57739	0.242968	0.26437	0.302073	0.20066		0	0	0	0	0	m(CASTxB6)-cM/Mb	y
	female-cM/Mb	0.0184011	0.87146	0.0211301	0.89338	0.173765	0.42167	0.0554651	0.81947		0	0	0	0	0	female-cM/Mb	y
	male-cM/Mb	0.0555881	0.64406	0.0401321	0.81329	0.206813	0.34739	0.235067	0.32747		0	0	0	0	0	male-cM/Mb	y
	ave-cM/Mb	0.0447251	0.70821	0.0347431	0.83465	0.201018	0.36073	0.181523	0.45032		0	0	0	0	0	ave-cM/Mb	y
111.7-121.7	f(B6xCAST)-cM	-0.300279	0.0005601	-0.411292	0.0012701	-0.521717	0.0079701	-0.476285	0.0322101		111111	111111	111111	111111	444444	f(B6xCAST)-cM	z
	f(CASTxB6)-cM	-0.30336	0.0004201	-0.466906	0.0002301	-0.608006	0.0013601	-0.484721	0.0239401		111111	111111	111111	111111	444444	f(CASTxB6)-cM	z
	m(B6xCAST)-cM	-0.164026	0.10487	-0.315897	0.0253601	-0.37805	0.0635801	-0.233419	0.32177		0	111111	0	0	111111	m(B6xCAST)-cM	z
	m(CASTxB6)-cM	-0.187966	0.0615801	-0.304195	0.0324501	-0.433907	0.0323401	-0.430741	0.0577601		0	111111	111111	0	222222	m(CASTxB6)-cM	z
	female-cM	-0.310974	0.0003301	-0.456273	0.0003001	-0.588672	0.0023001	-0.487801	0.0240801		111111	111111	111111	111111	444444	female-cM	z
	male-cM	-0.184466	0.0673501	-0.327376	0.0210001	-0.427231	0.0346901	-0.354939	0.12519		0	111111	111111	0	222222	male-cM	z
	ave-cM	-0.263246	0.0071601	-0.426752	0.0019501	-0.560254	0.0044401	-0.460371	0.0421901		111111	111111	111111	111111	444444	ave-cM	z
111.7-121.7	f(B6xCAST)-cM/Mb	-0.300279	0.0005201	-0.411292	0.0013001	-0.521717	0.0081101	-0.476285	0.0313501		111111	111111	111111	111111	444444	f(B6xCAST)-cM/Mb	z
	f(CASTxB6)-cM/Mb	-0.30336	0.0005201	-0.466906	0.0002801	-0.608006	0.0017801	-0.484721	0.0248501		111111	111111	111111	111111	444444	f(CASTxB6)-cM/Mb	z
	m(B6xCAST)-cM/Mb	-0.164026	0.10219	-0.315897	0.0264001	-0.37805	0.0646301	-0.233419	0.31965		0	111111	0	0	111111	m(B6xCAST)-cM/Mb	z
	m(CASTxB6)-cM/Mb	-0.187966	0.0622101	-0.304195	0.0322101	-0.433908	0.0322101	-0.430741	0.0589301		0	111111	111111	0	222222	m(CASTxB6)-cM/Mb	z
	female-cM/Mb	-0.310974	0.0004001	-0.456273	0.0004301	-0.588672	0.0026201	-0.487801	0.0245301		111111	111111	111111	111111	444444	female-cM/Mb	z
	male-cM/Mb	-0.184466	0.0680201	-0.327376	0.0215101	-0.427231	0.0358501	-0.354939	0.1246		0	111111	111111	0	222222	male-cM/Mb	z
	ave-cM/Mb	-0.263246	0.0072201	-0.426752	0.0018901	-0.560254	0.0042501	-0.460371	0.0415301		111111	111111	111111	111111	444444	ave-cM/Mb	z

## Sheet: exon
section (Mbp position)	cross	100.cor	100.sig	200.cor	200.sig	400.cor	400.sig	500.cor	500.sig	111111	100kb	200kb	400kb	500kb	SUM	cross	section
3-13	f(B6xCAST)-cM	-0.0400171	0.69237	-0.145181	0.31297	-0.25005	0.22243	-0.17091	0.4659		0	0	0	0	0	f(B6xCAST)-cM	A
	f(CASTxB6)-cM	-0.0768171	0.44891	-0.155575	0.28001	-0.211873	0.30712	-0.184467	0.43297		0	0	0	0	0	f(CASTxB6)-cM	A
	m(B6xCAST)-cM	-0.0802601	0.43052	-0.0837321	0.58371	-0.107812	0.61928	0.0169221	0.94401		0	0	0	0	0	m(B6xCAST)-cM	A
	m(CASTxB6)-cM	-0.0531521	0.60364	-0.14718	0.31153	-0.215866	0.29493	-0.120692	0.60136		0	0	0	0	0	m(CASTxB6)-cM	A
	female-cM	-0.0627131	0.53862	-0.154576	0.28216	-0.233059	0.25675	-0.183638	0.43583		0	0	0	0	0	female-cM	A
	male-cM	-0.0749151	0.46432	-0.118666	0.42698	-0.163236	0.44129	-0.0526921	0.82097		0	0	0	0	0	male-cM	A
	ave-cM	-0.0717841	0.47702	-0.151859	0.29207	-0.224147	0.27993	-0.158374	0.49557		0	0	0	0	0	ave-cM	A
3-13	f(B6xCAST)-cM/Mb	-0.0400171	0.69499	-0.145181	0.3125	-0.25005	0.2204	-0.17091	0.46506		0	0	0	0	0	f(B6xCAST)-cM/Mb	A
	f(CASTxB6)-cM/Mb	-0.0768171	0.44999	-0.155575	0.27639	-0.211873	0.30723	-0.184467	0.43277		0	0	0	0	0	f(CASTxB6)-cM/Mb	A
	m(B6xCAST)-cM/Mb	-0.0802601	0.43139	-0.0837321	0.58275	-0.107812	0.6184	0.0169221	0.94282		0	0	0	0	0	m(B6xCAST)-cM/Mb	A
	m(CASTxB6)-cM/Mb	-0.0531521	0.60698	-0.147179	0.31262	-0.215866	0.29484	-0.120692	0.60613		0	0	0	0	0	m(CASTxB6)-cM/Mb	A
	female-cM/Mb	-0.0627121	0.53485	-0.154575	0.27967	-0.233059	0.25741	-0.183638	0.43112		0	0	0	0	0	female-cM/Mb	A
	male-cM/Mb	-0.0749151	0.46547	-0.118666	0.42982	-0.163236	0.43995	-0.0526911	0.82034		0	0	0	0	0	male-cM/Mb	A
	ave-cM/Mb	-0.0717841	0.47959	-0.151859	0.29304	-0.224147	0.27859	-0.158374	0.49548		0	0	0	0	0	ave-cM/Mb	A
13-23	f(B6xCAST)-cM	0.0263991	0.78855	-0.0378501	0.8142	0.241008	0.24852	0.268395	0.26915		0	0	0	0	0	f(B6xCAST)-cM	B
	f(CASTxB6)-cM	0.0589911	0.53327	-0.0272521	0.86092	0.178133	0.41061	0.138715	0.59188		0	0	0	0	0	f(CASTxB6)-cM	B
	m(B6xCAST)-cM	0.133533	0.12375	0.204181	0.1418	0.230626	0.28573	0.441428	0.0245001		0	0	0	111111	111111	m(B6xCAST)-cM	B
	m(CASTxB6)-cM	0.173508	0.0784401	0.183767	0.18187	0.228473	0.29982	0.390813	0.0502701		0	0	0	0	0	m(CASTxB6)-cM	B
	female-cM	0.0435131	0.6521	-0.0327431	0.8362	0.210155	0.32687	0.203583	0.4259		0	0	0	0	0	female-cM	B
	male-cM	0.153735	0.10021	0.198433	0.14942	0.233558	0.28004	0.426117	0.0251401		0	0	0	111111	111111	male-cM	B
	ave-cM	0.111321	0.2279	0.0956221	0.53579	0.265086	0.2043	0.397808	0.0766601		0	0	0	0	0	ave-cM	B
13-23	f(B6xCAST)-cM/Mb	0.0263991	0.7861	-0.0378491	0.81581	0.241008	0.25039	0.268395	0.27021		0	0	0	0	0	f(B6xCAST)-cM/Mb	B
	f(CASTxB6)-cM/Mb	0.0589911	0.53267	-0.0272521	0.86133	0.178133	0.41182	0.138715	0.58882		0	0	0	0	0	f(CASTxB6)-cM/Mb	B
	m(B6xCAST)-cM/Mb	0.133533	0.12257	0.204181	0.14322	0.230626	0.28962	0.441429	0.0250001		0	0	0	111111	111111	m(B6xCAST)-cM/Mb	B
	m(CASTxB6)-cM/Mb	0.173508	0.0789501	0.183767	0.18213	0.228473	0.29717	0.390813	0.0502001		0	0	0	0	0	m(CASTxB6)-cM/Mb	B
	female-cM/Mb	0.0435131	0.65119	-0.0327431	0.83655	0.210155	0.32673	0.203583	0.42664		0	0	0	0	0	female-cM/Mb	B
	male-cM/Mb	0.153735	0.0985001	0.198433	0.1535	0.233558	0.2769	0.426117	0.0252801		0	0	0	111111	111111	male-cM/Mb	B
	ave-cM/Mb	0.111321	0.22689	0.0956221	0.53599	0.265086	0.20467	0.397808	0.0748701		0	0	0	0	0	ave-cM/Mb	B
23-33	f(B6xCAST)-cM	-0.180655	0.0654501	-0.282672	0.0436601	-0.339924	0.0910701	-0.288173	0.21173		0	111111	0	0	111111	f(B6xCAST)-cM	C
	f(CASTxB6)-cM	-0.119475	0.21924	-0.173272	0.22739	-0.182342	0.39518	-0.224078	0.33111		0	0	0	0	0	f(CASTxB6)-cM	C
	m(B6xCAST)-cM	-0.0946311	0.34245	-0.0764791	0.61312	-0.0358651	0.87097	0.123398	0.613		0	0	0	0	0	m(B6xCAST)-cM	C
	m(CASTxB6)-cM	-0.113864	0.25111	-0.137411	0.34685	-0.138696	0.52326	-0.0941231	0.71381		0	0	0	0	0	m(CASTxB6)-cM	C
	female-cM	-0.15626	0.10796	-0.236112	0.0917801	-0.261555	0.20111	-0.260504	0.25811		0	0	0	0	0	female-cM	C
	male-cM	-0.11174	0.26538	-0.112722	0.44594	-0.0909741	0.6757	0.0144111	0.95394		0	0	0	0	0	male-cM	C
	ave-cM	-0.146756	0.135	-0.197093	0.16858	-0.205081	0.33207	-0.154896	0.52222		0	0	0	0	0	ave-cM	C
23-33	f(B6xCAST)-cM/Mb	-0.180655	0.0655001	-0.282672	0.0438501	-0.339923	0.0921101	-0.288173	0.21037		0	111111	0	0	111111	f(B6xCAST)-cM/Mb	C
	f(CASTxB6)-cM/Mb	-0.119476	0.21859	-0.173272	0.22415	-0.182342	0.39183	-0.224078	0.33222		0	0	0	0	0	f(CASTxB6)-cM/Mb	C
	m(B6xCAST)-cM/Mb	-0.0946311	0.34259	-0.0764791	0.61222	-0.0358651	0.87318	0.123399	0.61657		0	0	0	0	0	m(B6xCAST)-cM/Mb	C
	m(CASTxB6)-cM/Mb	-0.113864	0.2534	-0.137411	0.34431	-0.138696	0.52028	-0.0941231	0.71705		0	0	0	0	0	m(CASTxB6)-cM/Mb	C
	female-cM/Mb	-0.156259	0.10743	-0.236112	0.0922501	-0.261555	0.20164	-0.260504	0.25969		0	0	0	0	0	female-cM/Mb	C
	male-cM/Mb	-0.11174	0.26428	-0.112722	0.44255	-0.0909731	0.67906	0.0144121	0.95359		0	0	0	0	0	male-cM/Mb	C
	ave-cM/Mb	-0.146756	0.13671	-0.197093	0.16931	-0.205081	0.32875	-0.154896	0.52612		0	0	0	0	0	ave-cM/Mb	C
33-43	f(B6xCAST)-cM	-0.0910171	0.28841	0.0154101	0.9198	0.0585851	0.78616	-0.126763	0.59869		0	0	0	0	0	f(B6xCAST)-cM	D
	f(CASTxB6)-cM	-0.0834881	0.35112	0.0107271	0.94018	0.0670951	0.75207	-0.196475	0.4055		0	0	0	0	0	f(CASTxB6)-cM	D
	m(B6xCAST)-cM	-0.0062861	0.94721	0.0198731	0.89026	0.259234	0.20565	0.0496311	0.83016		0	0	0	0	0	m(B6xCAST)-cM	D
	m(CASTxB6)-cM	-0.0907661	0.32233	-0.0969291	0.50249	-0.0414221	0.84461	-0.152504	0.52132		0	0	0	0	0	m(CASTxB6)-cM	D
	female-cM	-0.0900431	0.30948	0.0135021	0.92474	0.0643871	0.76312	-0.16475	0.48956		0	0	0	0	0	female-cM	D
	male-cM	-0.0504081	0.59112	-0.0419001	0.77225	0.116287	0.58395	-0.0553341	0.82232		0	0	0	0	0	male-cM	D
	ave-cM	-0.0751951	0.40661	-0.0121251	0.93361	0.0920961	0.66428	-0.114442	0.63355		0	0	0	0	0	ave-cM	D
33-43	f(B6xCAST)-cM/Mb	-0.0910171	0.28602	0.0154101	0.91828	0.0585851	0.78539	-0.126763	0.60012		0	0	0	0	0	f(B6xCAST)-cM/Mb	D
	f(CASTxB6)-cM/Mb	-0.0834881	0.35136	0.0107271	0.94105	0.0670951	0.75237	-0.196475	0.4028		0	0	0	0	0	f(CASTxB6)-cM/Mb	D
	m(B6xCAST)-cM/Mb	-0.0062861	0.94708	0.0198731	0.88859	0.259234	0.20741	0.0496311	0.83103		0	0	0	0	0	m(B6xCAST)-cM/Mb	D
	m(CASTxB6)-cM/Mb	-0.0907661	0.32674	-0.0969291	0.50004	-0.0414221	0.84671	-0.152504	0.52111		0	0	0	0	0	m(CASTxB6)-cM/Mb	D
	female-cM/Mb	-0.0900431	0.30684	0.0135021	0.92411	0.0643871	0.76165	-0.16475	0.48603		0	0	0	0	0	female-cM/Mb	D
	male-cM/Mb	-0.0504081	0.59243	-0.0419001	0.76996	0.116287	0.58133	-0.0553341	0.82125		0	0	0	0	0	male-cM/Mb	D
	ave-cM/Mb	-0.0751951	0.40843	-0.0121251	0.93249	0.0920971	0.66464	-0.114442	0.63294		0	0	0	0	0	ave-cM/Mb	D
43-53	f(B6xCAST)-cM	-0.0874801	0.39009	-0.0869111	0.54972	-0.0133711	0.95217	-0.121222	0.62094		0	0	0	0	0	f(B6xCAST)-cM	E
	f(CASTxB6)-cM	-0.12488	0.20851	-0.161549	0.25979	-0.209539	0.31844	-0.262653	0.2627		0	0	0	0	0	f(CASTxB6)-cM	E
	m(B6xCAST)-cM	0.0225361	0.82731	0.0122261	0.93607	0.102963	0.63509	0.195329	0.41627		0	0	0	0	0	m(B6xCAST)-cM	E
	m(CASTxB6)-cM	0.0193691	0.85157	0.0142601	0.92605	0.0914731	0.67607	0.178559	0.46308		0	0	0	0	0	m(CASTxB6)-cM	E
	female-cM	-0.117726	0.23717	-0.138851	0.33921	-0.129782	0.53557	-0.208879	0.37939		0	0	0	0	0	female-cM	E
	male-cM	0.0210341	0.83963	0.0133841	0.92972	0.0972831	0.65693	0.187751	0.43743		0	0	0	0	0	male-cM	E
	ave-cM	-0.0262061	0.79758	-0.0375471	0.80226	0.0306061	0.88831	0.0697511	0.77706		0	0	0	0	0	ave-cM	E
43-53	f(B6xCAST)-cM/Mb	-0.0874791	0.38663	-0.0869111	0.55015	-0.0133721	0.95085	-0.121222	0.61928		0	0	0	0	0	f(B6xCAST)-cM/Mb	E
	f(CASTxB6)-cM/Mb	-0.12488	0.20835	-0.16155	0.25908	-0.209539	0.31577	-0.262653	0.26185		0	0	0	0	0	f(CASTxB6)-cM/Mb	E
	m(B6xCAST)-cM/Mb	0.0225361	0.8269	0.0122261	0.93524	0.102963	0.63706	0.195329	0.42144		0	0	0	0	0	m(B6xCAST)-cM/Mb	E
	m(CASTxB6)-cM/Mb	0.0193691	0.85268	0.0142601	0.92342	0.0914731	0.67339	0.17856	0.4619		0	0	0	0	0	m(CASTxB6)-cM/Mb	E
	female-cM/Mb	-0.117726	0.23989	-0.138852	0.33685	-0.129783	0.53392	-0.20888	0.37794		0	0	0	0	0	female-cM/Mb	E
	male-cM/Mb	0.0210341	0.84037	0.0133841	0.92838	0.0972831	0.65591	0.187751	0.43618		0	0	0	0	0	male-cM/Mb	E
	ave-cM/Mb	-0.0262061	0.79985	-0.0375471	0.80032	0.0306071	0.88878	0.0697511	0.77654		0	0	0	0	0	ave-cM/Mb	E
53-63	f(B6xCAST)-cM	-0.197183	0.0467501	-0.257695	0.0685201	-0.160063	0.44812	-0.286951	0.22098		111111	0	0	0	111111	f(B6xCAST)-cM	F
	f(CASTxB6)-cM	-0.0720871	0.475	-0.138962	0.34274	-0.0456181	0.83515	-0.167506	0.48868		0	0	0	0	0	f(CASTxB6)-cM	F
	m(B6xCAST)-cM	-0.107487	0.27755	-0.180722	0.20416	0.0355901	0.86748	-0.0462941	0.84781		0	0	0	0	0	m(B6xCAST)-cM	F
	m(CASTxB6)-cM	-0.0830731	0.40899	-0.103525	0.47464	0.152823	0.46896	0.0398801	0.86909		0	0	0	0	0	m(CASTxB6)-cM	F
	female-cM	-0.128249	0.1918	-0.199156	0.16757	-0.104256	0.62675	-0.240707	0.31292		0	0	0	0	0	female-cM	F
	male-cM	-0.0951721	0.33857	-0.137711	0.33993	0.110597	0.60262	0.0040171	0.98691		0	0	0	0	0	male-cM	F
	ave-cM	-0.11558	0.24607	-0.174184	0.22538	0.0583031	0.78115	-0.0853211	0.71878		0	0	0	0	0	ave-cM	F
53-63	f(B6xCAST)-cM/Mb	-0.197183	0.0463301	-0.257694	0.0695201	-0.160063	0.449	-0.286951	0.2219		111111	0	0	0	111111	f(B6xCAST)-cM/Mb	F
	f(CASTxB6)-cM/Mb	-0.0720871	0.47417	-0.138962	0.34255	-0.0456181	0.83504	-0.167506	0.49113		0	0	0	0	0	f(CASTxB6)-cM/Mb	F
	m(B6xCAST)-cM/Mb	-0.107487	0.27464	-0.180722	0.20429	0.0355901	0.86763	-0.0462941	0.8484		0	0	0	0	0	m(B6xCAST)-cM/Mb	F
	m(CASTxB6)-cM/Mb	-0.0830731	0.40738	-0.103525	0.47849	0.152823	0.4678	0.0398801	0.86789		0	0	0	0	0	m(CASTxB6)-cM/Mb	F
	female-cM/Mb	-0.128249	0.19254	-0.199157	0.16398	-0.104256	0.63146	-0.240707	0.31534		0	0	0	0	0	female-cM/Mb	F
	male-cM/Mb	-0.0951721	0.33802	-0.137711	0.33984	0.110597	0.60076	0.0040171	0.98597		0	0	0	0	0	male-cM/Mb	F
	ave-cM/Mb	-0.11558	0.24444	-0.174185	0.22468	0.0583031	0.78211	-0.0853211	0.72135		0	0	0	0	0	ave-cM/Mb	F
63-73	f(B6xCAST)-cM	-0.140296	0.16335	-0.128772	0.37809	-0.215402	0.29892	-0.285399	0.22413		0	0	0	0	0	f(B6xCAST)-cM	G
	f(CASTxB6)-cM	-0.192771	0.0505201	-0.177848	0.21476	-0.194357	0.35147	-0.244131	0.30237		0	0	0	0	0	f(CASTxB6)-cM	G
	m(B6xCAST)-cM	-0.0117601	0.90872	0.0282981	0.84685	-0.0423641	0.83953	-0.0613041	0.80798		0	0	0	0	0	m(B6xCAST)-cM	G
	m(CASTxB6)-cM	-0.0378041	0.71162	-0.0405791	0.77932	-0.0240871	0.90906	-0.0129861	0.95712		0	0	0	0	0	m(CASTxB6)-cM	G
	female-cM	-0.179658	0.0694301	-0.166571	0.24805	-0.220699	0.28055	-0.286698	0.22122		0	0	0	0	0	female-cM	G
	male-cM	-0.0252921	0.80383	-0.0031341	0.982	-0.0358921	0.86543	-0.0421631	0.86309		0	0	0	0	0	male-cM	G
	ave-cM	-0.127053	0.2062	-0.107266	0.45967	-0.156167	0.45943	-0.20821	0.3833		0	0	0	0	0	ave-cM	G
63-73	f(B6xCAST)-cM/Mb	-0.140296	0.16145	-0.128772	0.37736	-0.215402	0.29784	-0.285399	0.22392		0	0	0	0	0	f(B6xCAST)-cM/Mb	G
	f(CASTxB6)-cM/Mb	-0.192772	0.0504601	-0.177847	0.21418	-0.194358	0.35198	-0.244132	0.30267		0	0	0	0	0	f(CASTxB6)-cM/Mb	G
	m(B6xCAST)-cM/Mb	-0.0117591	0.91071	0.0282981	0.84893	-0.0423641	0.83956	-0.0613051	0.804		0	0	0	0	0	m(B6xCAST)-cM/Mb	G
	m(CASTxB6)-cM/Mb	-0.0378041	0.71079	-0.0405781	0.7808	-0.0240871	0.91143	-0.0129861	0.95731		0	0	0	0	0	m(CASTxB6)-cM/Mb	G
	female-cM/Mb	-0.179657	0.0672901	-0.16657	0.249	-0.220699	0.28369	-0.286699	0.22145		0	0	0	0	0	female-cM/Mb	G
	male-cM/Mb	-0.0252931	0.80735	-0.0031331	0.98199	-0.0358921	0.86482	-0.0421631	0.86332		0	0	0	0	0	male-cM/Mb	G
	ave-cM/Mb	-0.127054	0.204	-0.107266	0.46539	-0.156168	0.45867	-0.208211	0.38415		0	0	0	0	0	ave-cM/Mb	G
73-83	f(B6xCAST)-cM	-0.0226131	0.82956	-0.101446	0.50346	-0.28453	0.16764	-0.388415	0.0912001		0	0	0	0	0	f(B6xCAST)-cM	H
	f(CASTxB6)-cM	-0.0828251	0.41274	-0.177249	0.21887	-0.338624	0.0988901	-0.350065	0.13176		0	0	0	0	0	f(CASTxB6)-cM	H
	m(B6xCAST)-cM	0.186965	0.0609401	0.19504	0.17825	0.154088	0.46124	0.0938441	0.70045		0	0	0	0	0	m(B6xCAST)-cM	H
	m(CASTxB6)-cM	0.128442	0.20591	0.11865	0.42891	0.0971121	0.64575	0.0379471	0.87886		0	0	0	0	0	m(CASTxB6)-cM	H
	female-cM	-0.0510541	0.61742	-0.147109	0.319	-0.318677	0.12113	-0.40246	0.0796201		0	0	0	0	0	female-cM	H
	male-cM	0.163573	0.1023	0.163702	0.26782	0.131063	0.53494	0.0674481	0.78517		0	0	0	0	0	male-cM	H
	ave-cM	0.0472471	0.64671	-0.0210111	0.88803	-0.151356	0.47605	-0.238683	0.31689		0	0	0	0	0	ave-cM	H
73-83	f(B6xCAST)-cM/Mb	-0.0226141	0.83121	-0.101446	0.5042	-0.28453	0.16875	-0.388414	0.0915201		0	0	0	0	0	f(B6xCAST)-cM/Mb	H
	f(CASTxB6)-cM/Mb	-0.0828251	0.41434	-0.177249	0.21943	-0.338623	0.10015	-0.350064	0.13186		0	0	0	0	0	f(CASTxB6)-cM/Mb	H
	m(B6xCAST)-cM/Mb	0.186965	0.0600601	0.19504	0.17998	0.154088	0.4632	0.0938441	0.70276		0	0	0	0	0	m(B6xCAST)-cM/Mb	H
	m(CASTxB6)-cM/Mb	0.128442	0.20475	0.118651	0.43058	0.0971131	0.646	0.0379471	0.88005		0	0	0	0	0	m(CASTxB6)-cM/Mb	H
	female-cM/Mb	-0.0510541	0.62143	-0.147109	0.3168	-0.318678	0.12188	-0.40246	0.0781601		0	0	0	0	0	female-cM/Mb	H
	male-cM/Mb	0.163573	0.10165	0.163702	0.26574	0.131063	0.53287	0.0674481	0.78143		0	0	0	0	0	male-cM/Mb	H
	ave-cM/Mb	0.0472471	0.64831	-0.0210111	0.88681	-0.151356	0.46947	-0.238684	0.31804		0	0	0	0	0	ave-cM/Mb	H
83-93	f(B6xCAST)-cM	-0.163156	0.0977601	-0.0468891	0.75464	-0.0881961	0.67899	-0.0841051	0.72766		0	0	0	0	0	f(B6xCAST)-cM	I
	f(CASTxB6)-cM	-0.14348	0.14054	-0.0573861	0.7032	-0.132272	0.53911	-0.170068	0.52317		0	0	0	0	0	f(CASTxB6)-cM	I
	m(B6xCAST)-cM	0.0394951	0.70053	0.164434	0.27035	0.235854	0.26549	0.238818	0.32351		0	0	0	0	0	m(B6xCAST)-cM	I
	m(CASTxB6)-cM	-0.0732471	0.4715	-0.0002041	0.99884	-0.0747081	0.75367	-0.0187711	0.95425		0	0	0	0	0	m(CASTxB6)-cM	I
	female-cM	-0.158319	0.10352	-0.0542391	0.71736	-0.115719	0.58612	-0.136127	0.59041		0	0	0	0	0	female-cM	I
	male-cM	-0.0378261	0.71633	0.0611701	0.70099	0.0361801	0.8751	0.0675721	0.81275		0	0	0	0	0	male-cM	I
	ave-cM	-0.115269	0.24743	-0.0077571	0.9608	-0.0608141	0.78034	-0.0578511	0.83928		0	0	0	0	0	ave-cM	I
83-93	f(B6xCAST)-cM/Mb	-0.163156	0.0958001	-0.0468891	0.75438	-0.0881961	0.67751	-0.0841051	0.72823		0	0	0	0	0	f(B6xCAST)-cM/Mb	I
	f(CASTxB6)-cM/Mb	-0.14348	0.14014	-0.0573861	0.70229	-0.132272	0.53701	-0.170069	0.52294		0	0	0	0	0	f(CASTxB6)-cM/Mb	I
	m(B6xCAST)-cM/Mb	0.0394951	0.70427	0.164434	0.26864	0.235854	0.26544	0.238819	0.32486		0	0	0	0	0	m(B6xCAST)-cM/Mb	I
	m(CASTxB6)-cM/Mb	-0.0732471	0.47011	-0.0002041	0.99904	-0.0747081	0.75616	-0.0187721	0.95358		0	0	0	0	0	m(CASTxB6)-cM/Mb	I
	female-cM/Mb	-0.158319	0.10167	-0.0542391	0.72169	-0.115719	0.58702	-0.136127	0.58962		0	0	0	0	0	female-cM/Mb	I
	male-cM/Mb	-0.0378261	0.71443	0.0611691	0.70049	0.0361801	0.87242	0.0675721	0.81397		0	0	0	0	0	male-cM/Mb	I
	ave-cM/Mb	-0.115269	0.24553	-0.0077571	0.96011	-0.0608141	0.78011	-0.0578521	0.83907		0	0	0	0	0	ave-cM/Mb	I
93-103	f(B6xCAST)-cM	-0.0486431	0.63077	-0.0659161	0.65032	-0.140964	0.50419	-0.11611	0.63053		0	0	0	0	0	f(B6xCAST)-cM	J
	f(CASTxB6)-cM	-0.135695	0.17882	-0.191188	0.18543	-0.295057	0.15489	-0.31394	0.17977		0	0	0	0	0	f(CASTxB6)-cM	J
	m(B6xCAST)-cM	-0.0185111	0.85594	0.116329	0.41756	0.205943	0.32233	0.464545	0.0377901		0	0	0	111111	111111	m(B6xCAST)-cM	J
	m(CASTxB6)-cM	0.0400991	0.69175	0.135848	0.34341	0.357379	0.0762901	0.454844	0.0419801		0	0	0	111111	111111	m(CASTxB6)-cM	J
	female-cM	-0.0997401	0.3243	-0.137867	0.34262	-0.227722	0.27821	-0.211269	0.37758		0	0	0	0	0	female-cM	J
	male-cM	0.0138501	0.89223	0.134676	0.34501	0.309757	0.12824	0.490549	0.0260001		0	0	0	111111	111111	male-cM	J
	ave-cM	-0.0440921	0.66544	-0.0036361	0.97992	0.0478981	0.81932	0.164584	0.48839		0	0	0	0	0	ave-cM	J
93-103	f(B6xCAST)-cM/Mb	-0.0486431	0.63372	-0.0659161	0.65417	-0.140964	0.50748	-0.11611	0.62957		0	0	0	0	0	f(B6xCAST)-cM/Mb	J
	f(CASTxB6)-cM/Mb	-0.135695	0.18043	-0.191188	0.18442	-0.295056	0.15349	-0.31394	0.17855		0	0	0	0	0	f(CASTxB6)-cM/Mb	J
	m(B6xCAST)-cM/Mb	-0.0185121	0.8566	0.116329	0.41936	0.205943	0.32105	0.464546	0.0382001		0	0	0	111111	111111	m(B6xCAST)-cM/Mb	J
	m(CASTxB6)-cM/Mb	0.0400991	0.69078	0.135848	0.34373	0.357379	0.0749601	0.454844	0.0421101		0	0	0	111111	111111	m(CASTxB6)-cM/Mb	J
	female-cM/Mb	-0.0997401	0.3254	-0.137867	0.34083	-0.227722	0.27495	-0.211269	0.37522		0	0	0	0	0	female-cM/Mb	J
	male-cM/Mb	0.0138501	0.89225	0.134676	0.34709	0.309757	0.12724	0.490549	0.0257401		0	0	0	111111	111111	male-cM/Mb	J
	ave-cM/Mb	-0.0440921	0.66329	-0.0036361	0.97971	0.0478981	0.82035	0.164585	0.48658		0	0	0	0	0	ave-cM/Mb	J
103-113	f(B6xCAST)-cM	-0.0897621	0.38743	-0.0866661	0.54644	-0.0820641	0.68422	-0.287277	0.23531		0	0	0	0	0	f(B6xCAST)-cM	K
	f(CASTxB6)-cM	-0.136666	0.15451	-0.183781	0.18573	-0.191947	0.32656	-0.292938	0.21084		0	0	0	0	0	f(CASTxB6)-cM	K
	m(B6xCAST)-cM	-0.148118	0.12805	-0.162277	0.24671	-0.135655	0.50244	-0.248473	0.29805		0	0	0	0	0	m(B6xCAST)-cM	K
	m(CASTxB6)-cM	-0.0430001	0.68321	0.0086261	0.95054	0.0481051	0.80756	-0.0477411	0.84792		0	0	0	0	0	m(CASTxB6)-cM	K
	female-cM	-0.12143	0.21443	-0.144833	0.30534	-0.14765	0.46117	-0.298114	0.20467		0	0	0	0	0	female-cM	K
	male-cM	-0.0953711	0.34718	-0.0755231	0.5944	-0.0415181	0.83354	-0.141762	0.56341		0	0	0	0	0	male-cM	K
	ave-cM	-0.113653	0.26005	-0.114168	0.42437	-0.0985271	0.62955	-0.232597	0.33627		0	0	0	0	0	ave-cM	K
103-113	f(B6xCAST)-cM/Mb	-0.0897621	0.38541	-0.0866661	0.54096	-0.0820641	0.68291	-0.287277	0.23679		0	0	0	0	0	f(B6xCAST)-cM/Mb	K
	f(CASTxB6)-cM/Mb	-0.136666	0.15478	-0.183781	0.18696	-0.191947	0.3277	-0.292938	0.20965		0	0	0	0	0	f(CASTxB6)-cM/Mb	K
	m(B6xCAST)-cM/Mb	-0.148118	0.13001	-0.162277	0.24474	-0.135655	0.49953	-0.248473	0.29582		0	0	0	0	0	m(B6xCAST)-cM/Mb	K
	m(CASTxB6)-cM/Mb	-0.0430001	0.68326	0.0086261	0.95177	0.0481051	0.80595	-0.0477411	0.84884		0	0	0	0	0	m(CASTxB6)-cM/Mb	K
	female-cM/Mb	-0.12143	0.21965	-0.144833	0.30446	-0.14765	0.45914	-0.298114	0.2057		0	0	0	0	0	female-cM/Mb	K
	male-cM/Mb	-0.0953711	0.34782	-0.0755231	0.59475	-0.0415181	0.8344	-0.141762	0.56164		0	0	0	0	0	male-cM/Mb	K
	ave-cM/Mb	-0.113653	0.26126	-0.114168	0.42707	-0.0985271	0.63024	-0.232597	0.33962		0	0	0	0	0	ave-cM/Mb	K
113-121.7	f(B6xCAST)-cM	-0.0482711	0.67007	-0.0698371	0.66149	-0.179899	0.43099	-0.358068	0.14492		0	0	0	0	0	f(B6xCAST)-cM	L
	f(CASTxB6)-cM	-0.0687571	0.5393	-0.0753421	0.63971	-0.176357	0.44226	-0.330188	0.18241		0	0	0	0	0	f(CASTxB6)-cM	L
	m(B6xCAST)-cM	0.0050531	0.96336	-0.0640831	0.68248	-0.136512	0.55354	-0.10541	0.67961		0	0	0	0	0	m(B6xCAST)-cM	L
	m(CASTxB6)-cM	0.0301961	0.78323	0.0052061	0.97303	-0.0583471	0.79859	-0.0774111	0.76094		0	0	0	0	0	m(CASTxB6)-cM	L
	female-cM	-0.0610751	0.58841	-0.0750851	0.63905	-0.18451	0.42044	-0.36617	0.13733		0	0	0	0	0	female-cM	L
	male-cM	0.0178231	0.87127	-0.0315001	0.84294	-0.102377	0.65713	-0.0956431	0.70765		0	0	0	0	0	male-cM	L
	ave-cM	-0.0099261	0.92916	-0.0488851	0.75661	-0.135226	0.55493	-0.188903	0.45378		0	0	0	0	0	ave-cM	L
113-121.7	f(B6xCAST)-cM/Mb	-0.0482711	0.67056	-0.0698371	0.66044	-0.179899	0.43111	-0.358068	0.1465		0	0	0	0	0	f(B6xCAST)-cM/Mb	L
	f(CASTxB6)-cM/Mb	-0.0687571	0.53757	-0.0753421	0.63782	-0.176357	0.44063	-0.330188	0.18213		0	0	0	0	0	f(CASTxB6)-cM/Mb	L
	m(B6xCAST)-cM/Mb	0.0050531	0.96463	-0.0640831	0.68369	-0.136512	0.55356	-0.10541	0.67933		0	0	0	0	0	m(B6xCAST)-cM/Mb	L
	m(CASTxB6)-cM/Mb	0.0301961	0.78319	0.0052061	0.97334	-0.0583471	0.79905	-0.0774111	0.76336		0	0	0	0	0	m(CASTxB6)-cM/Mb	L
	female-cM/Mb	-0.0610751	0.58968	-0.0750851	0.63911	-0.18451	0.42206	-0.36617	0.13707		0	0	0	0	0	female-cM/Mb	L
	male-cM/Mb	0.0178241	0.87003	-0.0315001	0.8424	-0.102377	0.65594	-0.0956421	0.71023		0	0	0	0	0	male-cM/Mb	L
	ave-cM/Mb	-0.0099251	0.92708	-0.0488851	0.75505	-0.135226	0.55589	-0.188903	0.45394		0	0	0	0	0	ave-cM/Mb	L
3-11.7	f(B6xCAST)-cM	-0.113798	0.2888	-0.211263	0.16585	-0.332283	0.1254	-0.271319	0.26949		0	0	0	0	0	f(B6xCAST)-cM	o
	f(CASTxB6)-cM	-0.14797	0.15992	-0.21299	0.15863	-0.27447	0.2109	-0.282754	0.24914		0	0	0	0	0	f(CASTxB6)-cM	o
	m(B6xCAST)-cM	-0.0992581	0.36114	-0.112215	0.49432	-0.147204	0.52884	-0.0201041	0.93841		0	0	0	0	0	m(B6xCAST)-cM	o
	m(CASTxB6)-cM	-0.114768	0.28574	-0.184228	0.23354	-0.278789	0.20616	-0.168305	0.49577		0	0	0	0	0	m(CASTxB6)-cM	o
	female-cM	-0.138201	0.19472	-0.217953	0.15023	-0.305176	0.15857	-0.287018	0.24137		0	0	0	0	0	female-cM	o
	male-cM	-0.118085	0.27277	-0.151767	0.34658	-0.213082	0.34824	-0.100699	0.68583		0	0	0	0	0	male-cM	o
	ave-cM	-0.141126	0.18532	-0.207851	0.17533	-0.295326	0.17607	-0.251124	0.30337		0	0	0	0	0	ave-cM	o
3-11.7	f(B6xCAST)-cM/Mb	-0.113798	0.28939	-0.211263	0.16495	-0.332283	0.12398	-0.271319	0.26996		0	0	0	0	0	f(B6xCAST)-cM/Mb	o
	f(CASTxB6)-cM/Mb	-0.14797	0.16116	-0.21299	0.15973	-0.27447	0.21059	-0.282754	0.24872		0	0	0	0	0	f(CASTxB6)-cM/Mb	o
	m(B6xCAST)-cM/Mb	-0.0992581	0.35762	-0.112216	0.49953	-0.147204	0.52817	-0.0201041	0.93761		0	0	0	0	0	m(B6xCAST)-cM/Mb	o
	m(CASTxB6)-cM/Mb	-0.114767	0.28314	-0.184228	0.23652	-0.278789	0.20315	-0.168304	0.49599		0	0	0	0	0	m(CASTxB6)-cM/Mb	o
	female-cM/Mb	-0.1382	0.19516	-0.217953	0.15002	-0.305176	0.15976	-0.287018	0.24179		0	0	0	0	0	female-cM/Mb	o
	male-cM/Mb	-0.118085	0.27507	-0.151767	0.34401	-0.213083	0.35235	-0.100698	0.68207		0	0	0	0	0	male-cM/Mb	o
	ave-cM/Mb	-0.141126	0.18274	-0.207851	0.17598	-0.295326	0.17721	-0.251124	0.30723		0	0	0	0	0	ave-cM/Mb	o
11.7-21.7	f(B6xCAST)-cM	0.110046	0.17962	0.0531731	0.72139	0.3881	0.0461201	0.357694	0.10795		0	0	111111	0	111111	f(B6xCAST)-cM	p
	f(CASTxB6)-cM	0.131694	0.12325	0.0447091	0.76139	0.287407	0.15861	0.193729	0.43724		0	0	0	0	0	f(CASTxB6)-cM	p
	m(B6xCAST)-cM	0.0960941	0.24741	0.155878	0.26456	0.170579	0.46354	0.386617	0.0525001		0	0	0	0	0	m(B6xCAST)-cM	p
	m(CASTxB6)-cM	0.233337	0.0385401	0.232589	0.0906101	0.290466	0.1564	0.42748	0.0306001		111111	0	0	111111	222222	m(CASTxB6)-cM	p
	female-cM	0.122021	0.1413	0.0492761	0.73836	0.339007	0.0876001	0.275863	0.25122		0	0	0	0	0	female-cM	p
	male-cM	0.159705	0.0902401	0.193431	0.15808	0.225289	0.29413	0.408184	0.0378801		0	0	0	111111	111111	male-cM	p
	ave-cM	0.160601	0.0827501	0.13856	0.33879	0.327228	0.10517	0.420568	0.0564601		0	0	0	0	0	ave-cM	p
11.7-21.7	f(B6xCAST)-cM/Mb	0.110046	0.17973	0.0531731	0.71961	0.3881	0.0454601	0.357693	0.10949		0	0	111111	0	111111	f(B6xCAST)-cM/Mb	p
	f(CASTxB6)-cM/Mb	0.131694	0.1246	0.0447091	0.76402	0.287407	0.15749	0.193729	0.43555		0	0	0	0	0	f(CASTxB6)-cM/Mb	p
	m(B6xCAST)-cM/Mb	0.0960941	0.24513	0.155878	0.26349	0.170579	0.46544	0.386617	0.0535801		0	0	0	0	0	m(B6xCAST)-cM/Mb	p
	m(CASTxB6)-cM/Mb	0.233338	0.0387101	0.232589	0.0915301	0.290466	0.15666	0.42748	0.0308001		111111	0	0	111111	222222	m(CASTxB6)-cM/Mb	p
	female-cM/Mb	0.12202	0.14027	0.0492761	0.73868	0.339007	0.0882401	0.275863	0.25042		0	0	0	0	0	female-cM/Mb	p
	male-cM/Mb	0.159705	0.0911301	0.193432	0.15547	0.225289	0.29466	0.408184	0.0377701		0	0	0	111111	111111	male-cM/Mb	p
	ave-cM/Mb	0.160601	0.0836701	0.13856	0.33553	0.327228	0.10449	0.420568	0.0557201		0	0	0	0	0	ave-cM/Mb	p
21.7-31.7	f(B6xCAST)-cM	-0.1761	0.0713101	-0.270147	0.0527901	-0.336948	0.0958501	-0.283592	0.21388		0	0	0	0	0	f(B6xCAST)-cM	q
	f(CASTxB6)-cM	-0.122374	0.19677	-0.196699	0.15913	-0.229564	0.26195	-0.254869	0.2422		0	0	0	0	0	f(CASTxB6)-cM	q
	m(B6xCAST)-cM	0.0109211	0.91402	0.111791	0.4414	0.135493	0.53104	0.195922	0.4018		0	0	0	0	0	m(B6xCAST)-cM	q
	m(CASTxB6)-cM	-0.122352	0.21031	-0.133709	0.3557	-0.167925	0.4287	-0.159874	0.49016		0	0	0	0	0	m(CASTxB6)-cM	q
	female-cM	-0.156004	0.1025	-0.242839	0.0794101	-0.286251	0.15349	-0.27588	0.21279		0	0	0	0	0	female-cM	q
	male-cM	-0.0586341	0.56434	-0.0019591	0.98977	0.0030821	0.98819	0.0448781	0.85166		0	0	0	0	0	male-cM	q
	ave-cM	-0.126025	0.19424	-0.156494	0.27281	-0.187999	0.36644	-0.169597	0.46071		0	0	0	0	0	ave-cM	q
21.7-31.7	f(B6xCAST)-cM/Mb	-0.1761	0.0722401	-0.270146	0.0536501	-0.336948	0.0932101	-0.283592	0.21438		0	0	0	0	0	f(B6xCAST)-cM/Mb	q
	f(CASTxB6)-cM/Mb	-0.122374	0.19618	-0.196699	0.1574	-0.229564	0.26209	-0.254869	0.24461		0	0	0	0	0	f(CASTxB6)-cM/Mb	q
	m(B6xCAST)-cM/Mb	0.0109201	0.91428	0.111791	0.44283	0.135493	0.53063	0.195922	0.40076		0	0	0	0	0	m(B6xCAST)-cM/Mb	q
	m(CASTxB6)-cM/Mb	-0.122352	0.20724	-0.133708	0.35623	-0.167925	0.42871	-0.159874	0.49164		0	0	0	0	0	m(CASTxB6)-cM/Mb	q
	female-cM/Mb	-0.156004	0.10082	-0.242839	0.0801401	-0.286251	0.15249	-0.27588	0.21455		0	0	0	0	0	female-cM/Mb	q
	male-cM/Mb	-0.0586341	0.56435	-0.0019591	0.98936	0.0030831	0.98819	0.0448781	0.85333		0	0	0	0	0	male-cM/Mb	q
	ave-cM/Mb	-0.126025	0.19371	-0.156493	0.275	-0.187999	0.3675	-0.169597	0.46033		0	0	0	0	0	ave-cM/Mb	q
31.7-41.7	f(B6xCAST)-cM	-0.108971	0.21836	-0.0450391	0.77149	-0.0468861	0.82935	-0.171585	0.47453		0	0	0	0	0	f(B6xCAST)-cM	r
	f(CASTxB6)-cM	-0.0916001	0.33219	-0.0304461	0.8413	-0.0007811	0.99696	-0.205872	0.37469		0	0	0	0	0	f(CASTxB6)-cM	r
	m(B6xCAST)-cM	-0.0189801	0.8445	-0.0217151	0.88092	0.15665	0.45782	0.0663351	0.78608		0	0	0	0	0	m(B6xCAST)-cM	r
	m(CASTxB6)-cM	-0.0905321	0.35112	-0.105183	0.4714	-0.0633781	0.76498	-0.120497	0.61431		0	0	0	0	0	m(CASTxB6)-cM	r
	female-cM	-0.1037	0.2655	-0.0390791	0.80245	-0.0253041	0.90878	-0.192549	0.41728		0	0	0	0	0	female-cM	r
	male-cM	-0.0566821	0.56143	-0.0670001	0.64771	0.0516301	0.80961	-0.0293411	0.90567		0	0	0	0	0	male-cM	r
	ave-cM	-0.0859941	0.36537	-0.0538781	0.72045	0.0126931	0.95409	-0.114992	0.63499		0	0	0	0	0	ave-cM	r
31.7-41.7	f(B6xCAST)-cM/Mb	-0.108971	0.2174	-0.0450401	0.7686	-0.0468861	0.82658	-0.171585	0.47118		0	0	0	0	0	f(B6xCAST)-cM/Mb	r
	f(CASTxB6)-cM/Mb	-0.0916001	0.33244	-0.0304461	0.84255	-0.0007811	0.99718	-0.205872	0.37479		0	0	0	0	0	f(CASTxB6)-cM/Mb	r
	m(B6xCAST)-cM/Mb	-0.0189801	0.8459	-0.0217141	0.88302	0.15665	0.46165	0.0663351	0.78542		0	0	0	0	0	m(B6xCAST)-cM/Mb	r
	m(CASTxB6)-cM/Mb	-0.0905321	0.35118	-0.105183	0.4741	-0.0633771	0.76676	-0.120497	0.61818		0	0	0	0	0	m(CASTxB6)-cM/Mb	r
	female-cM/Mb	-0.1037	0.26501	-0.0390791	0.80376	-0.0253041	0.90726	-0.192549	0.41666		0	0	0	0	0	female-cM/Mb	r
	male-cM/Mb	-0.0566821	0.56023	-0.0670001	0.64822	0.0516301	0.80976	-0.0293411	0.90577		0	0	0	0	0	male-cM/Mb	r
	ave-cM/Mb	-0.0859941	0.36651	-0.0538781	0.72159	0.0126931	0.95233	-0.114992	0.63522		0	0	0	0	0	ave-cM/Mb	r
41.7-51.7	f(B6xCAST)-cM	-0.0580761	0.56965	-0.0453411	0.757	0.0439641	0.83889	-0.0661021	0.78726		0	0	0	0	0	f(B6xCAST)-cM	s
	f(CASTxB6)-cM	-0.0621151	0.54137	-0.0820071	0.57944	-0.104261	0.63277	-0.132782	0.57372		0	0	0	0	0	f(CASTxB6)-cM	s
	m(B6xCAST)-cM	0.0621201	0.54653	0.0683751	0.64895	0.179083	0.41062	0.291408	0.22192		0	0	0	0	0	m(B6xCAST)-cM	s
	m(CASTxB6)-cM	0.0529941	0.60784	0.0630511	0.67874	0.157656	0.46941	0.266025	0.26832		0	0	0	0	0	m(CASTxB6)-cM	s
	female-cM	-0.0657841	0.51985	-0.0702621	0.63257	-0.0374001	0.8606	-0.106479	0.65794		0	0	0	0	0	female-cM	s
	male-cM	0.0577571	0.57858	0.0659841	0.66536	0.168374	0.43811	0.279794	0.24301		0	0	0	0	0	male-cM	s
	ave-cM	0.0198631	0.84818	0.0249711	0.86768	0.114573	0.60033	0.166019	0.49545		0	0	0	0	0	ave-cM	s
41.7-51.7	f(B6xCAST)-cM/Mb	-0.0580761	0.56804	-0.0453411	0.75722	0.0439641	0.84073	-0.0661021	0.78714		0	0	0	0	0	f(B6xCAST)-cM/Mb	s
	f(CASTxB6)-cM/Mb	-0.0621151	0.54091	-0.0820071	0.57944	-0.104261	0.62818	-0.132782	0.57532		0	0	0	0	0	f(CASTxB6)-cM/Mb	s
	m(B6xCAST)-cM/Mb	0.0621201	0.54993	0.0683751	0.65218	0.179083	0.41162	0.291408	0.22337		0	0	0	0	0	m(B6xCAST)-cM/Mb	s
	m(CASTxB6)-cM/Mb	0.0529941	0.61084	0.0630511	0.67857	0.157656	0.4709	0.266025	0.26932		0	0	0	0	0	m(CASTxB6)-cM/Mb	s
	female-cM/Mb	-0.0657841	0.51727	-0.0702631	0.63238	-0.0374011	0.85947	-0.106479	0.65596		0	0	0	0	0	female-cM/Mb	s
	male-cM/Mb	0.0577571	0.58101	0.0659841	0.66429	0.168374	0.44128	0.279794	0.24286		0	0	0	0	0	male-cM/Mb	s
	ave-cM/Mb	0.0198631	0.84772	0.0249711	0.86944	0.114573	0.60136	0.166019	0.49972		0	0	0	0	0	ave-cM/Mb	s
51.7-61.7	f(B6xCAST)-cM	-0.200753	0.0429101	-0.269143	0.0581201	-0.197377	0.34711	-0.308145	0.18641		111111	0	0	0	111111	f(B6xCAST)-cM	t
	f(CASTxB6)-cM	-0.124716	0.19577	-0.200933	0.15999	-0.153315	0.47335	-0.256493	0.28371		0	0	0	0	0	f(CASTxB6)-cM	t
	m(B6xCAST)-cM	-0.163297	0.0909201	-0.24612	0.0787101	-0.0437431	0.83531	-0.272542	0.25142		0	0	0	0	0	m(B6xCAST)-cM	t
	m(CASTxB6)-cM	-0.0807901	0.41849	-0.0915531	0.53404	0.175047	0.4117	-0.0422751	0.85989		0	0	0	0	0	m(CASTxB6)-cM	t
	female-cM	-0.163125	0.0943201	-0.241575	0.0884601	-0.18486	0.38198	-0.303029	0.19673		0	0	0	0	0	female-cM	t
	male-cM	-0.116312	0.23843	-0.155561	0.27708	0.0994581	0.63694	-0.137089	0.56411		0	0	0	0	0	male-cM	t
	ave-cM	-0.144048	0.1369	-0.204045	0.15169	-0.0004431	0.99835	-0.235313	0.31954		0	0	0	0	0	ave-cM	t
51.7-61.7	f(B6xCAST)-cM/Mb	-0.200753	0.0422601	-0.269143	0.0562401	-0.197377	0.34234	-0.308145	0.18591		111111	0	0	0	111111	f(B6xCAST)-cM/Mb	t
	f(CASTxB6)-cM/Mb	-0.124717	0.19775	-0.200933	0.16117	-0.153315	0.47243	-0.256494	0.27976		0	0	0	0	0	f(CASTxB6)-cM/Mb	t
	m(B6xCAST)-cM/Mb	-0.163297	0.0901401	-0.246121	0.0791801	-0.0437431	0.83984	-0.272542	0.24887		0	0	0	0	0	m(B6xCAST)-cM/Mb	t
	m(CASTxB6)-cM/Mb	-0.0807911	0.41907	-0.0915531	0.53336	0.175047	0.40944	-0.0422751	0.85861		0	0	0	0	0	m(CASTxB6)-cM/Mb	t
	female-cM/Mb	-0.163125	0.0947701	-0.241576	0.0890001	-0.18486	0.38119	-0.303029	0.19784		0	0	0	0	0	female-cM/Mb	t
	male-cM/Mb	-0.116312	0.237	-0.155561	0.27908	0.0994581	0.63714	-0.137089	0.56234		0	0	0	0	0	male-cM/Mb	t
	ave-cM/Mb	-0.144048	0.13725	-0.204045	0.14979	-0.0004421	0.99833	-0.235314	0.32276		0	0	0	0	0	ave-cM/Mb	t
61.7-71.7	f(B6xCAST)-cM	-0.187456	0.0559601	-0.176701	0.21786	-0.223632	0.27585	-0.301467	0.19278		0	0	0	0	0	f(B6xCAST)-cM	u
	f(CASTxB6)-cM	-0.203387	0.0380301	-0.220117	0.11918	-0.197278	0.3389	-0.252707	0.28874		111111	0	0	0	111111	f(CASTxB6)-cM	u
	m(B6xCAST)-cM	-0.0639841	0.52728	-0.0845501	0.55874	-0.0678811	0.73614	-0.0313221	0.89662		0	0	0	0	0	m(B6xCAST)-cM	u
	m(CASTxB6)-cM	-0.0593151	0.55842	-0.0738081	0.61889	-0.0408611	0.83446	0.0149951	0.95167		0	0	0	0	0	m(CASTxB6)-cM	u
	female-cM	-0.208593	0.0329501	-0.213116	0.13486	-0.223411	0.27496	-0.294632	0.20803		111111	0	0	0	111111	female-cM	u
	male-cM	-0.0619611	0.54256	-0.0792901	0.59033	-0.0536281	0.78362	-0.0062831	0.97924		0	0	0	0	0	male-cM	u
	ave-cM	-0.135451	0.16447	-0.152035	0.27775	-0.146548	0.48229	-0.143845	0.5555		0	0	0	0	0	ave-cM	u
61.7-71.7	f(B6xCAST)-cM/Mb	-0.187456	0.0565901	-0.1767	0.22111	-0.223632	0.27436	-0.301467	0.19386		0	0	0	0	0	f(B6xCAST)-cM/Mb	u
	f(CASTxB6)-cM/Mb	-0.203387	0.0372601	-0.220117	0.12055	-0.197278	0.34071	-0.252707	0.28702		111111	0	0	0	111111	f(CASTxB6)-cM/Mb	u
	m(B6xCAST)-cM/Mb	-0.0639841	0.52899	-0.0845501	0.55958	-0.0678811	0.73593	-0.0313221	0.89671		0	0	0	0	0	m(B6xCAST)-cM/Mb	u
	m(CASTxB6)-cM/Mb	-0.0593161	0.5613	-0.0738071	0.62211	-0.0408611	0.83437	0.0149951	0.95004		0	0	0	0	0	m(CASTxB6)-cM/Mb	u
	female-cM/Mb	-0.208592	0.0322501	-0.213116	0.13486	-0.223411	0.2724	-0.294632	0.20783		111111	0	0	0	111111	female-cM/Mb	u
	male-cM/Mb	-0.0619611	0.5434	-0.0792891	0.59078	-0.0536281	0.78759	-0.0062831	0.97838		0	0	0	0	0	male-cM/Mb	u
	ave-cM/Mb	-0.135451	0.16436	-0.152035	0.27956	-0.146548	0.48475	-0.143846	0.55559		0	0	0	0	0	ave-cM/Mb	u
71.7-81.7	f(B6xCAST)-cM	0.0237731	0.8263	-0.0297211	0.84845	-0.209079	0.31996	-0.375792	0.10244		0	0	0	0	0	f(B6xCAST)-cM	v
	f(CASTxB6)-cM	-0.0502791	0.62209	-0.0786691	0.58896	-0.237841	0.25715	-0.335579	0.15056		0	0	0	0	0	f(CASTxB6)-cM	v
	m(B6xCAST)-cM	0.279295	0.0051601	0.346328	0.0123301	0.297347	0.14899	0.236873	0.32166		111111	111111	0	0	222222	m(B6xCAST)-cM	v
	m(CASTxB6)-cM	0.169969	0.0893301	0.170947	0.24485	0.156136	0.45717	0.0942701	0.70008		0	0	0	0	0	m(CASTxB6)-cM	v
	female-cM	-0.0066781	0.94961	-0.0565931	0.7061	-0.232774	0.26808	-0.397274	0.0842301		0	0	0	0	0	female-cM	v
	male-cM	0.238066	0.0165601	0.280336	0.0461401	0.242242	0.24237	0.175212	0.46682		111111	111111	0	0	222222	male-cM	v
	ave-cM	0.116658	0.25539	0.103661	0.47926	-0.0344151	0.86962	-0.183219	0.44737		0	0	0	0	0	ave-cM	v
71.7-81.7	f(B6xCAST)-cM/Mb	0.0237731	0.82532	-0.0297211	0.84867	-0.209079	0.31974	-0.375792	0.10211		0	0	0	0	0	f(B6xCAST)-cM/Mb	v
	f(CASTxB6)-cM/Mb	-0.0502791	0.62093	-0.0786691	0.58835	-0.237841	0.25352	-0.335578	0.14962		0	0	0	0	0	f(CASTxB6)-cM/Mb	v
	m(B6xCAST)-cM/Mb	0.279295	0.0053401	0.346328	0.0124001	0.297347	0.15006	0.236873	0.32311		111111	111111	0	0	222222	m(B6xCAST)-cM/Mb	v
	m(CASTxB6)-cM/Mb	0.16997	0.0903301	0.170948	0.24435	0.156137	0.45381	0.0942711	0.69954		0	0	0	0	0	m(CASTxB6)-cM/Mb	v
	female-cM/Mb	-0.0066781	0.94871	-0.0565931	0.70745	-0.232774	0.26833	-0.397273	0.0842801		0	0	0	0	0	female-cM/Mb	v
	male-cM/Mb	0.238065	0.0164201	0.280336	0.0470901	0.242241	0.24799	0.175212	0.4669		111111	111111	0	0	222222	male-cM/Mb	v
	ave-cM/Mb	0.116658	0.25235	0.103661	0.4766	-0.0344151	0.87	-0.18322	0.44596		0	0	0	0	0	ave-cM/Mb	v
81.7-91.7	f(B6xCAST)-cM	-0.185017	0.0579601	-0.103377	0.46918	-0.185145	0.3699	-0.149938	0.52224		0	0	0	0	0	f(B6xCAST)-cM	w
	f(CASTxB6)-cM	-0.163469	0.0866001	-0.107468	0.44912	-0.212871	0.30111	-0.195768	0.41167		0	0	0	0	0	f(CASTxB6)-cM	w
	m(B6xCAST)-cM	-0.0295801	0.7758	0.0449981	0.75312	0.0335751	0.87291	0.0597901	0.80209		0	0	0	0	0	m(B6xCAST)-cM	w
	m(CASTxB6)-cM	-0.106196	0.28215	-0.0693411	0.6496	-0.186176	0.37023	-0.111882	0.66183		0	0	0	0	0	m(CASTxB6)-cM	w
	female-cM	-0.180085	0.0618501	-0.109669	0.43966	-0.208921	0.31068	-0.181211	0.44344		0	0	0	0	0	female-cM	w
	male-cM	-0.0841881	0.40594	-0.0299111	0.84017	-0.113948	0.58424	-0.0591371	0.81386		0	0	0	0	0	male-cM	w
	ave-cM	-0.14764	0.12828	-0.0810851	0.57511	-0.181856	0.3782	-0.13862	0.56703		0	0	0	0	0	ave-cM	w
81.7-91.7	f(B6xCAST)-cM/Mb	-0.185017	0.0577301	-0.103378	0.46479	-0.185145	0.37022	-0.149938	0.52112		0	0	0	0	0	f(B6xCAST)-cM/Mb	w
	f(CASTxB6)-cM/Mb	-0.163469	0.0885801	-0.107468	0.45175	-0.212871	0.30317	-0.195768	0.41188		0	0	0	0	0	f(CASTxB6)-cM/Mb	w
	m(B6xCAST)-cM/Mb	-0.0295801	0.77626	0.0449991	0.75519	0.0335751	0.87145	0.0597901	0.7997		0	0	0	0	0	m(B6xCAST)-cM/Mb	w
	m(CASTxB6)-cM/Mb	-0.106196	0.28362	-0.0693411	0.6499	-0.186176	0.369	-0.111882	0.66451		0	0	0	0	0	m(CASTxB6)-cM/Mb	w
	female-cM/Mb	-0.180085	0.0609301	-0.109669	0.44057	-0.20892	0.30876	-0.181211	0.43955		0	0	0	0	0	female-cM/Mb	w
	male-cM/Mb	-0.0841881	0.40726	-0.0299121	0.84361	-0.113948	0.58388	-0.0591381	0.81261		0	0	0	0	0	male-cM/Mb	w
	ave-cM/Mb	-0.14764	0.12938	-0.0810851	0.57342	-0.181856	0.37991	-0.138621	0.57006		0	0	0	0	0	ave-cM/Mb	w
91.7-101.7	f(B6xCAST)-cM	-0.0009631	0.99236	0.0278161	0.84865	-0.0103071	0.96257	-0.0456401	0.85153		0	0	0	0	0	f(B6xCAST)-cM	x
	f(CASTxB6)-cM	-0.0766941	0.45177	-0.0778571	0.59359	-0.127241	0.54449	-0.206206	0.38258		0	0	0	0	0	f(CASTxB6)-cM	x
	m(B6xCAST)-cM	0.0771501	0.44692	0.263787	0.0634701	0.403873	0.0443501	0.587033	0.0063901		0	0	111111	111111	222222	m(B6xCAST)-cM	x
	m(CASTxB6)-cM	0.124038	0.21654	0.265614	0.0603901	0.48653	0.0124001	0.515486	0.0158301		0	0	111111	111111	222222	m(CASTxB6)-cM	x
	female-cM	-0.0427131	0.67651	-0.0278741	0.84996	-0.0678861	0.74892	-0.120967	0.61546		0	0	0	0	0	female-cM	x
	male-cM	0.107795	0.2832	0.279782	0.0476501	0.477787	0.0160501	0.580235	0.0060801		0	111111	111111	111111	333333	male-cM	x
	ave-cM	0.0406511	0.68576	0.144337	0.31652	0.248787	0.23135	0.283976	0.22011		0	0	0	0	0	ave-cM	x
91.7-101.7	f(B6xCAST)-cM/Mb	-0.0009631	0.99248	0.0278161	0.84836	-0.0103071	0.96179	-0.0456401	0.85176		0	0	0	0	0	f(B6xCAST)-cM/Mb	x
	f(CASTxB6)-cM/Mb	-0.0766941	0.45315	-0.0778581	0.59102	-0.127241	0.55036	-0.206206	0.38627		0	0	0	0	0	f(CASTxB6)-cM/Mb	x
	m(B6xCAST)-cM/Mb	0.0771501	0.44681	0.263787	0.0640101	0.403873	0.0444801	0.587033	0.0064401		0	0	111111	111111	222222	m(B6xCAST)-cM/Mb	x
	m(CASTxB6)-cM/Mb	0.124038	0.21593	0.265614	0.0601401	0.48653	0.0129801	0.515486	0.0162701		0	0	111111	111111	222222	m(CASTxB6)-cM/Mb	x
	female-cM/Mb	-0.0427131	0.67772	-0.0278741	0.84851	-0.0678861	0.75126	-0.120967	0.61669		0	0	0	0	0	female-cM/Mb	x
	male-cM/Mb	0.107795	0.28547	0.279782	0.0478601	0.477787	0.0149801	0.580235	0.0066101		0	111111	111111	111111	333333	male-cM/Mb	x
	ave-cM/Mb	0.0406501	0.68984	0.144337	0.31666	0.248787	0.23061	0.283976	0.22093		0	0	0	0	0	ave-cM/Mb	x
101.7-111.7	f(B6xCAST)-cM	0.0695471	0.51311	0.150744	0.28782	0.24304	0.21867	0.0382361	0.8813		0	0	0	0	0	f(B6xCAST)-cM	y
	f(CASTxB6)-cM	0.0416731	0.68913	0.155675	0.27872	0.278304	0.17794	0.0117281	0.96023		0	0	0	0	0	f(CASTxB6)-cM	y
	m(B6xCAST)-cM	-0.0961761	0.35986	-0.0787021	0.58551	-0.0602751	0.76762	-0.191405	0.43952		0	0	0	0	0	m(B6xCAST)-cM	y
	m(CASTxB6)-cM	0.0017131	0.9882	0.0851571	0.55473	0.132171	0.50424	0.0616861	0.80402		0	0	0	0	0	m(CASTxB6)-cM	y
	female-cM	0.0631881	0.54816	0.161414	0.25121	0.26875	0.184	0.0293341	0.90457		0	0	0	0	0	female-cM	y
	male-cM	-0.0450781	0.68889	0.0096921	0.94544	0.0444391	0.81873	-0.0497511	0.85205		0	0	0	0	0	male-cM	y
	ave-cM	-0.0118361	0.91749	0.0581841	0.68689	0.120656	0.54033	-0.0239491	0.92421		0	0	0	0	0	ave-cM	y
101.7-111.7	f(B6xCAST)-cM/Mb	0.0695461	0.51272	0.150744	0.28691	0.24304	0.22121	0.0382361	0.88168		0	0	0	0	0	f(B6xCAST)-cM/Mb	y
	f(CASTxB6)-cM/Mb	0.0416731	0.68785	0.155675	0.27874	0.278303	0.1774	0.0117281	0.96119		0	0	0	0	0	f(CASTxB6)-cM/Mb	y
	m(B6xCAST)-cM/Mb	-0.0961761	0.36037	-0.0787021	0.58648	-0.0602751	0.76545	-0.191405	0.43814		0	0	0	0	0	m(B6xCAST)-cM/Mb	y
	m(CASTxB6)-cM/Mb	0.0017131	0.98833	0.0851571	0.54951	0.132171	0.50069	0.0616861	0.80937		0	0	0	0	0	m(CASTxB6)-cM/Mb	y
	female-cM/Mb	0.0631881	0.54601	0.161414	0.25461	0.26875	0.18037	0.0293341	0.90392		0	0	0	0	0	female-cM/Mb	y
	male-cM/Mb	-0.0450781	0.68567	0.0096921	0.94556	0.0444391	0.82054	-0.0497511	0.85086		0	0	0	0	0	male-cM/Mb	y
	ave-cM/Mb	-0.0118361	0.915	0.0581841	0.68761	0.120656	0.54112	-0.0239491	0.92549		0	0	0	0	0	ave-cM/Mb	y
111.7-121.7	f(B6xCAST)-cM	-0.191615	0.0503301	-0.267574	0.0564301	-0.394529	0.0485301	-0.470079	0.0348301		0	0	111111	111111	222222	f(B6xCAST)-cM	z
	f(CASTxB6)-cM	-0.201889	0.0370701	-0.299772	0.0311101	-0.414707	0.0359701	-0.423391	0.0600601		111111	111111	111111	0	333333	f(CASTxB6)-cM	z
	m(B6xCAST)-cM	-0.0749931	0.4653	-0.168729	0.24716	-0.248487	0.23915	-0.237302	0.31971		0	0	0	0	0	m(B6xCAST)-cM	z
	m(CASTxB6)-cM	-0.0549801	0.59706	-0.11686	0.43048	-0.199653	0.34412	-0.250915	0.28734		0	0	0	0	0	m(CASTxB6)-cM	z
	female-cM	-0.203409	0.0361301	-0.294569	0.0349101	-0.418769	0.0347401	-0.449115	0.0455401		111111	111111	111111	111111	444444	female-cM	z
	male-cM	-0.0681091	0.50834	-0.151053	0.30216	-0.236184	0.26325	-0.258657	0.27271		0	0	0	0	0	male-cM	z
	ave-cM	-0.141325	0.16399	-0.239889	0.0929001	-0.359259	0.0813501	-0.387776	0.0907101		0	0	0	0	0	ave-cM	z
111.7-121.7	f(B6xCAST)-cM/Mb	-0.191615	0.0498901	-0.267574	0.0554201	-0.394529	0.0474201	-0.470079	0.0330601		111111	0	111111	111111	333333	f(B6xCAST)-cM/Mb	z
	f(CASTxB6)-cM/Mb	-0.201889	0.0365101	-0.299772	0.0314001	-0.414708	0.0346001	-0.423391	0.0584801		111111	111111	111111	0	333333	f(CASTxB6)-cM/Mb	z
	m(B6xCAST)-cM/Mb	-0.0749931	0.46494	-0.168729	0.24353	-0.248487	0.23806	-0.237302	0.31387		0	0	0	0	0	m(B6xCAST)-cM/Mb	z
	m(CASTxB6)-cM/Mb	-0.0549801	0.59427	-0.11686	0.42733	-0.199653	0.34305	-0.250915	0.29143		0	0	0	0	0	m(CASTxB6)-cM/Mb	z
	female-cM/Mb	-0.203409	0.0353301	-0.294569	0.0339401	-0.418769	0.0350401	-0.449115	0.0444701		111111	111111	111111	111111	444444	female-cM/Mb	z
	male-cM/Mb	-0.0681081	0.51023	-0.151053	0.30091	-0.236184	0.25945	-0.258657	0.27475		0	0	0	0	0	male-cM/Mb	z
	ave-cM/Mb	-0.141325	0.16521	-0.239889	0.0939301	-0.359259	0.0789101	-0.387775	0.0920301		0	0	0	0	0	ave-cM/Mb	z

## Sheet: tss
section (Mbp position)	cross	100.cor	100.sig	200.cor	200.sig	400.cor	400.sig	500.cor	500.sig	111111	100kb	200kb	400kb	500kb	SUM	cross	section
3-13	f(B6xCAST)-cM	-0.10136	0.31307	-0.219378	0.11878	-0.280429	0.16991	-0.251252	0.27766		0	0	0	0	0	f(B6xCAST)-cM	A
	f(CASTxB6)-cM	-0.0847931	0.40191	-0.165982	0.24459	-0.184932	0.36529	-0.168399	0.47975		0	0	0	0	0	f(CASTxB6)-cM	A
	m(B6xCAST)-cM	-0.0787421	0.44102	-0.116565	0.42488	-0.134445	0.52986	-0.0760901	0.75282		0	0	0	0	0	m(B6xCAST)-cM	A
	m(CASTxB6)-cM	-0.0750741	0.4616	-0.12754	0.38002	-0.179415	0.38955	-0.100336	0.66797		0	0	0	0	0	m(CASTxB6)-cM	A
	female-cM	-0.0944171	0.34966	-0.193887	0.1682	-0.230654	0.26021	-0.211382	0.37235		0	0	0	0	0	female-cM	A
	male-cM	-0.0858131	0.40018	-0.128098	0.37751	-0.161784	0.44802	-0.0970691	0.6807		0	0	0	0	0	male-cM	A
	ave-cM	-0.0987091	0.32666	-0.182447	0.20089	-0.221916	0.28195	-0.194011	0.4037		0	0	0	0	0	ave-cM	A
3-13	f(B6xCAST)-cM/Mb	-0.10136	0.31184	-0.219378	0.11981	-0.280429	0.16851	-0.251252	0.28077		0	0	0	0	0	f(B6xCAST)-cM/Mb	A
	f(CASTxB6)-cM/Mb	-0.0847931	0.40355	-0.165982	0.24415	-0.184932	0.36473	-0.168399	0.48206		0	0	0	0	0	f(CASTxB6)-cM/Mb	A
	m(B6xCAST)-cM/Mb	-0.0787421	0.44011	-0.116566	0.42203	-0.134445	0.5327	-0.0760901	0.75157		0	0	0	0	0	m(B6xCAST)-cM/Mb	A
	m(CASTxB6)-cM/Mb	-0.0750741	0.46262	-0.12754	0.37743	-0.179415	0.38835	-0.100336	0.6683		0	0	0	0	0	m(CASTxB6)-cM/Mb	A
	female-cM/Mb	-0.0944171	0.3497	-0.193887	0.17155	-0.230654	0.25813	-0.211382	0.37103		0	0	0	0	0	female-cM/Mb	A
	male-cM/Mb	-0.0858131	0.40008	-0.128098	0.3785	-0.161784	0.44713	-0.0970691	0.68155		0	0	0	0	0	male-cM/Mb	A
	ave-cM/Mb	-0.0987091	0.32678	-0.182447	0.20011	-0.221916	0.282	-0.194011	0.40695		0	0	0	0	0	ave-cM/Mb	A
13-23	f(B6xCAST)-cM	-0.0811991	0.38033	-0.0355561	0.83359	0.15504	0.48458	0.106798	0.66782		0	0	0	0	0	f(B6xCAST)-cM	B
	f(CASTxB6)-cM	-0.0806681	0.3954	-0.0520521	0.74087	0.0682411	0.75945	-0.0571971	0.81434		0	0	0	0	0	f(CASTxB6)-cM	B
	m(B6xCAST)-cM	0.0998781	0.26715	0.0916911	0.54316	0.121619	0.60891	0.138587	0.58961		0	0	0	0	0	m(B6xCAST)-cM	B
	m(CASTxB6)-cM	0.0595811	0.56892	0.0668881	0.68278	0.106423	0.66503	0.0799141	0.76205		0	0	0	0	0	m(CASTxB6)-cM	B
	female-cM	-0.0815361	0.38281	-0.0443831	0.78503	0.110486	0.62213	0.0217511	0.93026		0	0	0	0	0	female-cM	B
	male-cM	0.0839941	0.37577	0.0819331	0.60007	0.117029	0.62644	0.114219	0.66221		0	0	0	0	0	male-cM	B
	ave-cM	-0.0023661	0.98251	0.0211591	0.88856	0.13572	0.53939	0.0888841	0.71877		0	0	0	0	0	ave-cM	B
13-23	f(B6xCAST)-cM/Mb	-0.0811991	0.37847	-0.0355561	0.83174	0.15504	0.48306	0.106798	0.66905		0	0	0	0	0	f(B6xCAST)-cM/Mb	B
	f(CASTxB6)-cM/Mb	-0.0806681	0.39577	-0.0520521	0.74282	0.0682401	0.76176	-0.0571961	0.81551		0	0	0	0	0	f(CASTxB6)-cM/Mb	B
	m(B6xCAST)-cM/Mb	0.0998781	0.26796	0.0916911	0.54307	0.121619	0.6073	0.138587	0.58729		0	0	0	0	0	m(B6xCAST)-cM/Mb	B
	m(CASTxB6)-cM/Mb	0.0595811	0.56986	0.0668881	0.68126	0.106422	0.66271	0.0799141	0.75922		0	0	0	0	0	m(CASTxB6)-cM/Mb	B
	female-cM/Mb	-0.0815361	0.38195	-0.0443831	0.78637	0.110486	0.62427	0.0217511	0.93099		0	0	0	0	0	female-cM/Mb	B
	male-cM/Mb	0.0839941	0.37856	0.0819331	0.5967	0.117029	0.62764	0.114219	0.66303		0	0	0	0	0	male-cM/Mb	B
	ave-cM/Mb	-0.0023661	0.98215	0.0211591	0.88967	0.13572	0.53697	0.0888841	0.72288		0	0	0	0	0	ave-cM/Mb	B
23-33	f(B6xCAST)-cM	-0.105273	0.23971	-0.215042	0.12191	-0.271636	0.16242	-0.213271	0.32852		0	0	0	0	0	f(B6xCAST)-cM	C
	f(CASTxB6)-cM	-0.0697851	0.42618	-0.123043	0.35208	-0.118237	0.5484	-0.129067	0.5505		0	0	0	0	0	f(CASTxB6)-cM	C
	m(B6xCAST)-cM	-0.0495191	0.57909	-0.0609141	0.6535	-0.0601351	0.77775	0.181375	0.41382		0	0	0	0	0	m(B6xCAST)-cM	C
	m(CASTxB6)-cM	-0.0273221	0.76703	-0.0702061	0.61396	-0.0815111	0.70534	0.0226631	0.92021		0	0	0	0	0	m(CASTxB6)-cM	C
	female-cM	-0.0911461	0.29624	-0.174788	0.19091	-0.193711	0.30864	-0.172227	0.41424		0	0	0	0	0	female-cM	C
	male-cM	-0.0412351	0.64811	-0.0695291	0.61439	-0.0747751	0.72756	0.107205	0.6439		0	0	0	0	0	male-cM	C
	ave-cM	-0.0744721	0.39837	-0.138845	0.31402	-0.15566	0.44884	-0.0552561	0.80528		0	0	0	0	0	ave-cM	C
23-33	f(B6xCAST)-cM/Mb	-0.105272	0.23555	-0.215042	0.12179	-0.271635	0.16311	-0.213271	0.33157		0	0	0	0	0	f(B6xCAST)-cM/Mb	C
	f(CASTxB6)-cM/Mb	-0.0697851	0.42681	-0.123043	0.34975	-0.118237	0.54492	-0.129068	0.55015		0	0	0	0	0	f(CASTxB6)-cM/Mb	C
	m(B6xCAST)-cM/Mb	-0.0495191	0.57771	-0.0609141	0.65466	-0.0601341	0.77901	0.181376	0.41311		0	0	0	0	0	m(B6xCAST)-cM/Mb	C
	m(CASTxB6)-cM/Mb	-0.0273221	0.76389	-0.0702051	0.61579	-0.0815101	0.70376	0.0226631	0.91943		0	0	0	0	0	m(CASTxB6)-cM/Mb	C
	female-cM/Mb	-0.0911451	0.29605	-0.174788	0.19182	-0.193711	0.30816	-0.172227	0.41399		0	0	0	0	0	female-cM/Mb	C
	male-cM/Mb	-0.0412361	0.64904	-0.0695281	0.61489	-0.0747741	0.72952	0.107205	0.64372		0	0	0	0	0	male-cM/Mb	C
	ave-cM/Mb	-0.0744721	0.40201	-0.138844	0.31222	-0.15566	0.44897	-0.0552561	0.80707		0	0	0	0	0	ave-cM/Mb	C
33-43	f(B6xCAST)-cM	-0.0630221	0.48332	0.0152041	0.92301	0.0599121	0.78446	-0.18276	0.45587		0	0	0	0	0	f(B6xCAST)-cM	D
	f(CASTxB6)-cM	-0.0646821	0.47201	-0.0017141	0.99075	0.0110241	0.96167	-0.263561	0.25718		0	0	0	0	0	f(CASTxB6)-cM	D
	m(B6xCAST)-cM	-0.0241221	0.80215	-0.0626731	0.64836	0.229681	0.26284	-0.0578021	0.82291		0	0	0	0	0	m(B6xCAST)-cM	D
	m(CASTxB6)-cM	-0.0941151	0.29605	-0.107982	0.46621	-0.0557711	0.79398	-0.213156	0.37345		0	0	0	0	0	m(CASTxB6)-cM	D
	female-cM	-0.0657941	0.47227	0.0072381	0.9614	0.0369931	0.86491	-0.227513	0.33906		0	0	0	0	0	female-cM	D
	male-cM	-0.0616111	0.51147	-0.0900351	0.52794	0.0931111	0.66188	-0.142233	0.56738		0	0	0	0	0	male-cM	D
	ave-cM	-0.0661661	0.46708	-0.0382571	0.79178	0.0658801	0.76367	-0.191727	0.42821		0	0	0	0	0	ave-cM	D
33-43	f(B6xCAST)-cM/Mb	-0.0630221	0.48137	0.0152041	0.92154	0.0599121	0.78471	-0.18276	0.45526		0	0	0	0	0	f(B6xCAST)-cM/Mb	D
	f(CASTxB6)-cM/Mb	-0.0646821	0.47431	-0.0017141	0.99071	0.0110241	0.96112	-0.26356	0.25878		0	0	0	0	0	f(CASTxB6)-cM/Mb	D
	m(B6xCAST)-cM/Mb	-0.0241221	0.80051	-0.0626741	0.64652	0.229681	0.26665	-0.0578021	0.82327		0	0	0	0	0	m(B6xCAST)-cM/Mb	D
	m(CASTxB6)-cM/Mb	-0.0941151	0.29809	-0.107982	0.4623	-0.0557711	0.79723	-0.213156	0.37178		0	0	0	0	0	m(CASTxB6)-cM/Mb	D
	female-cM/Mb	-0.0657941	0.47354	0.0072381	0.96313	0.0369931	0.86871	-0.227513	0.33957		0	0	0	0	0	female-cM/Mb	D
	male-cM/Mb	-0.0616101	0.50964	-0.0900351	0.52737	0.0931101	0.66358	-0.142234	0.56791		0	0	0	0	0	male-cM/Mb	D
	ave-cM/Mb	-0.0661661	0.46393	-0.0382571	0.79016	0.0658801	0.76098	-0.191727	0.42581		0	0	0	0	0	ave-cM/Mb	D
43-53	f(B6xCAST)-cM	-0.121122	0.225	-0.169907	0.2353	-0.100182	0.63516	-0.189504	0.42999		0	0	0	0	0	f(B6xCAST)-cM	E
	f(CASTxB6)-cM	-0.139288	0.15753	-0.20704	0.1456	-0.259453	0.20977	-0.169413	0.47832		0	0	0	0	0	f(CASTxB6)-cM	E
	m(B6xCAST)-cM	0.0310711	0.76406	0.0621561	0.67537	0.162401	0.44601	0.243784	0.3065		0	0	0	0	0	m(B6xCAST)-cM	E
	m(CASTxB6)-cM	0.0280631	0.78955	0.0535921	0.72029	0.135506	0.52162	0.258908	0.27415		0	0	0	0	0	m(CASTxB6)-cM	E
	female-cM	-0.143617	0.14894	-0.208672	0.14438	-0.202883	0.33042	-0.194446	0.41355		0	0	0	0	0	female-cM	E
	male-cM	0.0297171	0.77583	0.0580231	0.69655	0.148758	0.48653	0.253348	0.28698		0	0	0	0	0	male-cM	E
	ave-cM	-0.0288911	0.78048	-0.0278371	0.8497	0.0452901	0.83316	0.123075	0.6118		0	0	0	0	0	ave-cM	E
43-53	f(B6xCAST)-cM/Mb	-0.121122	0.22529	-0.169907	0.23504	-0.100182	0.63534	-0.189504	0.42684		0	0	0	0	0	f(B6xCAST)-cM/Mb	E
	f(CASTxB6)-cM/Mb	-0.139288	0.15835	-0.20704	0.14471	-0.259453	0.20905	-0.169413	0.47806		0	0	0	0	0	f(CASTxB6)-cM/Mb	E
	m(B6xCAST)-cM/Mb	0.0310711	0.76474	0.0621561	0.67571	0.162401	0.44566	0.243784	0.30566		0	0	0	0	0	m(B6xCAST)-cM/Mb	E
	m(CASTxB6)-cM/Mb	0.0280631	0.78506	0.0535921	0.71856	0.135506	0.52753	0.258908	0.27303		0	0	0	0	0	m(CASTxB6)-cM/Mb	E
	female-cM/Mb	-0.143617	0.14701	-0.208672	0.14402	-0.202884	0.33082	-0.194446	0.41367		0	0	0	0	0	female-cM/Mb	E
	male-cM/Mb	0.0297171	0.77562	0.0580231	0.69605	0.148758	0.48398	0.253348	0.28175		0	0	0	0	0	male-cM/Mb	E
	ave-cM/Mb	-0.0288921	0.7784	-0.0278371	0.84792	0.0452901	0.83525	0.123075	0.61233		0	0	0	0	0	ave-cM/Mb	E
53-63	f(B6xCAST)-cM	-0.0824611	0.41506	-0.150734	0.2955	-0.117996	0.57371	-0.108498	0.64941		0	0	0	0	0	f(B6xCAST)-cM	F
	f(CASTxB6)-cM	-0.0577101	0.57197	-0.0986421	0.49717	0.0182131	0.93311	0.0007381	0.99762		0	0	0	0	0	f(CASTxB6)-cM	F
	m(B6xCAST)-cM	-0.0828101	0.40929	-0.159661	0.26341	-0.0823391	0.7016	-0.0833811	0.73219		0	0	0	0	0	m(B6xCAST)-cM	F
	m(CASTxB6)-cM	-0.0560801	0.58139	-0.0876511	0.54224	-0.0070421	0.97408	0.0057731	0.98145		0	0	0	0	0	m(CASTxB6)-cM	F
	female-cM	-0.0716341	0.47847	-0.12703	0.38366	-0.0465271	0.82905	-0.0537641	0.82681		0	0	0	0	0	female-cM	F
	male-cM	-0.0685631	0.49718	-0.119297	0.40622	-0.0378281	0.85859	-0.0321321	0.89523		0	0	0	0	0	male-cM	F
	ave-cM	-0.0768191	0.44778	-0.136442	0.34064	-0.0477151	0.82047	-0.0477311	0.84258		0	0	0	0	0	ave-cM	F
53-63	f(B6xCAST)-cM/Mb	-0.0824611	0.41741	-0.150733	0.29574	-0.117996	0.57449	-0.108498	0.64814		0	0	0	0	0	f(B6xCAST)-cM/Mb	F
	f(CASTxB6)-cM/Mb	-0.0577101	0.57102	-0.0986421	0.49841	0.0182131	0.93283	0.0007381	0.99762		0	0	0	0	0	f(CASTxB6)-cM/Mb	F
	m(B6xCAST)-cM/Mb	-0.0828101	0.40947	-0.159661	0.26153	-0.0823391	0.69855	-0.0833811	0.73357		0	0	0	0	0	m(B6xCAST)-cM/Mb	F
	m(CASTxB6)-cM/Mb	-0.0560801	0.58073	-0.0876511	0.54171	-0.0070421	0.97317	0.0057731	0.98096		0	0	0	0	0	m(CASTxB6)-cM/Mb	F
	female-cM/Mb	-0.0716341	0.4792	-0.127031	0.38356	-0.0465281	0.82849	-0.0537641	0.8235		0	0	0	0	0	female-cM/Mb	F
	male-cM/Mb	-0.0685631	0.49701	-0.119296	0.40253	-0.0378281	0.86092	-0.0321321	0.89554		0	0	0	0	0	male-cM/Mb	F
	ave-cM/Mb	-0.0768191	0.44824	-0.136442	0.34525	-0.0477141	0.82027	-0.0477311	0.84157		0	0	0	0	0	ave-cM/Mb	F
63-73	f(B6xCAST)-cM	-0.175056	0.0714501	-0.228569	0.10324	-0.319128	0.10737	-0.41843	0.0529501		0	0	0	0	0	f(B6xCAST)-cM	G
	f(CASTxB6)-cM	-0.147461	0.13298	-0.196895	0.16441	-0.277386	0.16595	-0.33788	0.13827		0	0	0	0	0	f(CASTxB6)-cM	G
	m(B6xCAST)-cM	-0.0083591	0.93464	-0.0395591	0.78894	-0.0976191	0.64548	-0.181439	0.45008		0	0	0	0	0	m(B6xCAST)-cM	G
	m(CASTxB6)-cM	0.0282651	0.77737	-0.0098501	0.94533	-0.0261621	0.90366	-0.0547171	0.82391		0	0	0	0	0	m(CASTxB6)-cM	G
	female-cM	-0.174579	0.0733301	-0.232323	0.0969401	-0.321473	0.10521	-0.410121	0.0648801		0	0	0	0	0	female-cM	G
	male-cM	0.0092191	0.92842	-0.0278691	0.84844	-0.0682211	0.74891	-0.132625	0.58753		0	0	0	0	0	male-cM	G
	ave-cM	-0.108788	0.27458	-0.159687	0.26282	-0.234358	0.24961	-0.327677	0.14796		0	0	0	0	0	ave-cM	G
63-73	f(B6xCAST)-cM/Mb	-0.175056	0.0719601	-0.228568	0.10411	-0.319128	0.10703	-0.41843	0.0542201		0	0	0	0	0	f(B6xCAST)-cM/Mb	G
	f(CASTxB6)-cM/Mb	-0.147462	0.13325	-0.196895	0.16196	-0.277386	0.168	-0.33788	0.13467		0	0	0	0	0	f(CASTxB6)-cM/Mb	G
	m(B6xCAST)-cM/Mb	-0.0083591	0.93562	-0.0395591	0.78462	-0.0976191	0.64655	-0.181439	0.45391		0	0	0	0	0	m(B6xCAST)-cM/Mb	G
	m(CASTxB6)-cM/Mb	0.0282661	0.7803	-0.0098501	0.94524	-0.0261611	0.90326	-0.0547171	0.82619		0	0	0	0	0	m(CASTxB6)-cM/Mb	G
	female-cM/Mb	-0.174578	0.0733001	-0.232322	0.10019	-0.321473	0.10298	-0.410121	0.0644901		0	0	0	0	0	female-cM/Mb	G
	male-cM/Mb	0.0092191	0.92778	-0.0278691	0.84741	-0.0682221	0.7499	-0.132625	0.59027		0	0	0	0	0	male-cM/Mb	G
	ave-cM/Mb	-0.108789	0.27515	-0.159687	0.26583	-0.234358	0.24843	-0.327678	0.14886		0	0	0	0	0	ave-cM/Mb	G
73-83	f(B6xCAST)-cM	-0.0623181	0.53625	-0.165462	0.23935	-0.384352	0.0648201	-0.42326	0.0677901		0	0	0	0	0	f(B6xCAST)-cM	H
	f(CASTxB6)-cM	-0.0773121	0.44219	-0.144526	0.32072	-0.324064	0.11844	-0.26409	0.26214		0	0	0	0	0	f(CASTxB6)-cM	H
	m(B6xCAST)-cM	0.163365	0.0906501	0.192599	0.17349	0.186784	0.36326	0.0709411	0.75111		0	0	0	0	0	m(B6xCAST)-cM	H
	m(CASTxB6)-cM	0.0491611	0.62402	0.0001971	0.9988	-0.0033251	0.98755	-0.0280581	0.90376		0	0	0	0	0	m(CASTxB6)-cM	H
	female-cM	-0.0747561	0.452	-0.171346	0.22676	-0.367505	0.0767101	-0.381688	0.0979201		0	0	0	0	0	female-cM	H
	male-cM	0.110975	0.25869	0.103444	0.46951	0.100096	0.62101	0.0209241	0.92713		0	0	0	0	0	male-cM	H
	ave-cM	0.0047141	0.96239	-0.0676571	0.64329	-0.199727	0.34272	-0.247236	0.30019		0	0	0	0	0	ave-cM	H
73-83	f(B6xCAST)-cM/Mb	-0.0623181	0.53204	-0.165462	0.23969	-0.384351	0.0668801	-0.423259	0.0675501		0	0	0	0	0	f(B6xCAST)-cM/Mb	H
	f(CASTxB6)-cM/Mb	-0.0773121	0.44057	-0.144526	0.31984	-0.324063	0.12022	-0.26409	0.26254		0	0	0	0	0	f(CASTxB6)-cM/Mb	H
	m(B6xCAST)-cM/Mb	0.163365	0.0926201	0.192599	0.17448	0.186784	0.36402	0.0709421	0.75455		0	0	0	0	0	m(B6xCAST)-cM/Mb	H
	m(CASTxB6)-cM/Mb	0.0491611	0.62696	0.0001981	0.99884	-0.0033241	0.98682	-0.0280581	0.90348		0	0	0	0	0	m(CASTxB6)-cM/Mb	H
	female-cM/Mb	-0.0747561	0.45411	-0.171345	0.22962	-0.367505	0.0792201	-0.381688	0.0968801		0	0	0	0	0	female-cM/Mb	H
	male-cM/Mb	0.110975	0.25638	0.103444	0.47232	0.100095	0.62435	0.0209231	0.9254		0	0	0	0	0	male-cM/Mb	H
	ave-cM/Mb	0.0047131	0.9622	-0.0676571	0.64414	-0.199727	0.34073	-0.247236	0.30042		0	0	0	0	0	ave-cM/Mb	H
83-93	f(B6xCAST)-cM	-0.152982	0.11893	-0.0069541	0.96145	-0.0514691	0.80837	-0.0175081	0.94282		0	0	0	0	0	f(B6xCAST)-cM	I
	f(CASTxB6)-cM	-0.127325	0.19784	0.0065101	0.96475	-0.0389381	0.85358	-0.0604441	0.82326		0	0	0	0	0	f(CASTxB6)-cM	I
	m(B6xCAST)-cM	0.0580971	0.57195	0.24693	0.0763101	0.293587	0.15169	0.320073	0.17056		0	0	0	0	0	m(B6xCAST)-cM	I
	m(CASTxB6)-cM	-0.0366551	0.72218	0.108296	0.46632	0.0623831	0.78451	0.126251	0.65293		0	0	0	0	0	m(CASTxB6)-cM	I
	female-cM	-0.144697	0.13863	-0.0002101	0.99896	-0.0473271	0.82666	-0.0426501	0.86678		0	0	0	0	0	female-cM	I
	male-cM	-0.0059971	0.95287	0.164829	0.25016	0.149981	0.49488	0.197708	0.43608		0	0	0	0	0	male-cM	I
	ave-cM	-0.0930141	0.35782	0.0707031	0.63583	0.0304171	0.89143	0.0555511	0.83755		0	0	0	0	0	ave-cM	I
83-93	f(B6xCAST)-cM/Mb	-0.152982	0.11958	-0.0069541	0.9633	-0.0514691	0.8069	-0.0175081	0.94203		0	0	0	0	0	f(B6xCAST)-cM/Mb	I
	f(CASTxB6)-cM/Mb	-0.127325	0.19911	0.0065101	0.96492	-0.0389381	0.85503	-0.0604441	0.82338		0	0	0	0	0	f(CASTxB6)-cM/Mb	I
	m(B6xCAST)-cM/Mb	0.0580971	0.57215	0.246931	0.0765801	0.293587	0.15111	0.320074	0.16977		0	0	0	0	0	m(B6xCAST)-cM/Mb	I
	m(CASTxB6)-cM/Mb	-0.0366551	0.72407	0.108296	0.46949	0.0623831	0.79001	0.12625	0.65291		0	0	0	0	0	m(CASTxB6)-cM/Mb	I
	female-cM/Mb	-0.144696	0.13806	-0.0002101	0.99894	-0.0473271	0.8252	-0.0426501	0.86475		0	0	0	0	0	female-cM/Mb	I
	male-cM/Mb	-0.0059971	0.95351	0.164829	0.24948	0.149981	0.49135	0.197708	0.43361		0	0	0	0	0	male-cM/Mb	I
	ave-cM/Mb	-0.0930141	0.35754	0.0707021	0.63876	0.0304171	0.88977	0.0555501	0.83616		0	0	0	0	0	ave-cM/Mb	I
93-103	f(B6xCAST)-cM	-0.0611891	0.54749	-0.0945221	0.51775	-0.196486	0.35454	-0.126894	0.60059		0	0	0	0	0	f(B6xCAST)-cM	J
	f(CASTxB6)-cM	-0.112406	0.26837	-0.134019	0.35342	-0.229235	0.27165	-0.219289	0.35938		0	0	0	0	0	f(CASTxB6)-cM	J
	m(B6xCAST)-cM	-0.0418801	0.6775	0.0286021	0.84469	0.11989	0.56824	0.363284	0.11113		0	0	0	0	0	m(B6xCAST)-cM	J
	m(CASTxB6)-cM	0.0679081	0.50157	0.0674711	0.63965	0.292068	0.1507	0.418699	0.0634401		0	0	0	0	0	m(CASTxB6)-cM	J
	female-cM	-0.0933861	0.35539	-0.122075	0.40139	-0.227974	0.27748	-0.174195	0.4677		0	0	0	0	0	female-cM	J
	male-cM	0.0183321	0.85453	0.0528881	0.71022	0.229987	0.2651	0.42306	0.0571301		0	0	0	0	0	male-cM	J
	ave-cM	-0.0380691	0.70464	-0.0412631	0.77537	0.0002751	0.99909	0.146766	0.53749		0	0	0	0	0	ave-cM	J
93-103	f(B6xCAST)-cM/Mb	-0.0611901	0.54545	-0.0945221	0.51464	-0.196486	0.35398	-0.126894	0.59896		0	0	0	0	0	f(B6xCAST)-cM/Mb	J
	f(CASTxB6)-cM/Mb	-0.112406	0.26538	-0.134019	0.35235	-0.229234	0.27103	-0.21929	0.35714		0	0	0	0	0	f(CASTxB6)-cM/Mb	J
	m(B6xCAST)-cM/Mb	-0.0418811	0.67826	0.0286011	0.84374	0.11989	0.56897	0.363284	0.10982		0	0	0	0	0	m(B6xCAST)-cM/Mb	J
	m(CASTxB6)-cM/Mb	0.0679081	0.50149	0.0674711	0.64132	0.292068	0.15146	0.418699	0.0619201		0	0	0	0	0	m(CASTxB6)-cM/Mb	J
	female-cM/Mb	-0.0933861	0.35615	-0.122076	0.40122	-0.227974	0.27613	-0.174195	0.46915		0	0	0	0	0	female-cM/Mb	J
	male-cM/Mb	0.0183321	0.857	0.0528881	0.71383	0.229987	0.26505	0.42306	0.0566201		0	0	0	0	0	male-cM/Mb	J
	ave-cM/Mb	-0.0380691	0.70609	-0.0412631	0.77442	0.0002751	0.999	0.146765	0.53645		0	0	0	0	0	ave-cM/Mb	J
103-113	f(B6xCAST)-cM	-0.0383891	0.71173	-0.0459431	0.74353	-0.0193611	0.91841	-0.165856	0.51361		0	0	0	0	0	f(B6xCAST)-cM	K
	f(CASTxB6)-cM	-0.109706	0.25456	-0.162916	0.21976	-0.142308	0.42505	-0.170393	0.51099		0	0	0	0	0	f(CASTxB6)-cM	K
	m(B6xCAST)-cM	-0.109202	0.26837	-0.118049	0.38694	-0.156031	0.42212	-0.1953	0.4195		0	0	0	0	0	m(B6xCAST)-cM	K
	m(CASTxB6)-cM	0.0161241	0.87557	0.0498181	0.71661	0.0325941	0.85716	0.0638241	0.79769		0	0	0	0	0	m(CASTxB6)-cM	K
	female-cM	-0.0810871	0.42085	-0.112876	0.4133	-0.0892471	0.63147	-0.172832	0.49608		0	0	0	0	0	female-cM	K
	male-cM	-0.0437241	0.66998	-0.0309821	0.82257	-0.0601621	0.75016	-0.0513121	0.83843		0	0	0	0	0	male-cM	K
	ave-cM	-0.0637751	0.53476	-0.0720151	0.61068	-0.0796751	0.68215	-0.117885	0.64334		0	0	0	0	0	ave-cM	K
103-113	f(B6xCAST)-cM/Mb	-0.0383901	0.71221	-0.0459431	0.74093	-0.0193621	0.91823	-0.165856	0.51249		0	0	0	0	0	f(B6xCAST)-cM/Mb	K
	f(CASTxB6)-cM/Mb	-0.109706	0.25724	-0.162916	0.21934	-0.142308	0.4264	-0.170393	0.51064		0	0	0	0	0	f(CASTxB6)-cM/Mb	K
	m(B6xCAST)-cM/Mb	-0.109202	0.26725	-0.118049	0.38712	-0.156031	0.42014	-0.1953	0.41998		0	0	0	0	0	m(B6xCAST)-cM/Mb	K
	m(CASTxB6)-cM/Mb	0.0161241	0.87537	0.0498181	0.71789	0.0325941	0.85838	0.0638251	0.79865		0	0	0	0	0	m(CASTxB6)-cM/Mb	K
	female-cM/Mb	-0.0810871	0.42036	-0.112876	0.41544	-0.0892471	0.63213	-0.172832	0.49758		0	0	0	0	0	female-cM/Mb	K
	male-cM/Mb	-0.0437241	0.67085	-0.0309831	0.82352	-0.0601621	0.75031	-0.0513121	0.83531		0	0	0	0	0	male-cM/Mb	K
	ave-cM/Mb	-0.0637751	0.53544	-0.0720151	0.6122	-0.0796751	0.68389	-0.117885	0.64267		0	0	0	0	0	ave-cM/Mb	K
113-121.7	f(B6xCAST)-cM	-0.0728911	0.49346	-0.11938	0.4229	-0.229662	0.28894	-0.259438	0.30135		0	0	0	0	0	f(B6xCAST)-cM	L
	f(CASTxB6)-cM	-0.0557121	0.60475	-0.0754191	0.61039	-0.196679	0.36082	-0.199846	0.43701		0	0	0	0	0	f(CASTxB6)-cM	L
	m(B6xCAST)-cM	-0.0023511	0.9821	-0.0554981	0.71899	-0.0978121	0.65332	-0.0319171	0.89844		0	0	0	0	0	m(B6xCAST)-cM	L
	m(CASTxB6)-cM	0.0654221	0.54153	0.0228861	0.87898	-0.0126681	0.95555	0.0555281	0.83302		0	0	0	0	0	m(CASTxB6)-cM	L
	female-cM	-0.0661381	0.53514	-0.0995331	0.50014	-0.219896	0.30467	-0.24392	0.33566		0	0	0	0	0	female-cM	L
	male-cM	0.0313261	0.77068	-0.0179091	0.90709	-0.0582481	0.79628	0.0119291	0.96307		0	0	0	0	0	male-cM	L
	ave-cM	-0.0024981	0.98143	-0.0486781	0.7485	-0.11734	0.59999	-0.0728381	0.77918		0	0	0	0	0	ave-cM	L
113-121.7	f(B6xCAST)-cM/Mb	-0.0728911	0.49356	-0.11938	0.42596	-0.229662	0.28902	-0.259438	0.30383		0	0	0	0	0	f(B6xCAST)-cM/Mb	L
	f(CASTxB6)-cM/Mb	-0.0557121	0.60453	-0.0754191	0.61417	-0.196679	0.35837	-0.199846	0.43438		0	0	0	0	0	f(CASTxB6)-cM/Mb	L
	m(B6xCAST)-cM/Mb	-0.0023511	0.98288	-0.0554981	0.71742	-0.0978121	0.65407	-0.0319171	0.89809		0	0	0	0	0	m(B6xCAST)-cM/Mb	L
	m(CASTxB6)-cM/Mb	0.0654221	0.5443	0.0228861	0.88092	-0.0126681	0.95556	0.0555281	0.83284		0	0	0	0	0	m(CASTxB6)-cM/Mb	L
	female-cM/Mb	-0.0661381	0.53751	-0.0995331	0.50141	-0.219897	0.30384	-0.24392	0.33422		0	0	0	0	0	female-cM/Mb	L
	male-cM/Mb	0.0313271	0.77005	-0.0179091	0.90907	-0.0582481	0.79202	0.0119291	0.96264		0	0	0	0	0	male-cM/Mb	L
	ave-cM/Mb	-0.0024981	0.98212	-0.0486781	0.75068	-0.11734	0.59788	-0.0728381	0.77932		0	0	0	0	0	ave-cM/Mb	L
3-11.7	f(B6xCAST)-cM	-0.16274	0.1236	-0.287375	0.0544501	-0.361762	0.0924101	-0.368091	0.13083		0	0	0	0	0	f(B6xCAST)-cM	o
	f(CASTxB6)-cM	-0.139659	0.1854	-0.220453	0.14191	-0.245131	0.26394	-0.276648	0.26541		0	0	0	0	0	f(CASTxB6)-cM	o
	m(B6xCAST)-cM	-0.0816551	0.45264	-0.133542	0.39113	-0.161558	0.48457	-0.103755	0.69036		0	0	0	0	0	m(B6xCAST)-cM	o
	m(CASTxB6)-cM	-0.0960281	0.37327	-0.130318	0.40504	-0.199452	0.37539	-0.123618	0.61952		0	0	0	0	0	m(CASTxB6)-cM	o
	female-cM	-0.154412	0.14406	-0.255877	0.0869101	-0.300372	0.1666	-0.328128	0.17947		0	0	0	0	0	female-cM	o
	male-cM	-0.0979551	0.36793	-0.139499	0.37007	-0.18721	0.41667	-0.127578	0.61007		0	0	0	0	0	male-cM	o
	ave-cM	-0.145877	0.17068	-0.229207	0.13022	-0.283261	0.19516	-0.290906	0.23879		0	0	0	0	0	ave-cM	o
3-11.7	f(B6xCAST)-cM/Mb	-0.16274	0.1255	-0.287375	0.0545601	-0.361762	0.0936201	-0.368091	0.13049		0	0	0	0	0	f(B6xCAST)-cM/Mb	o
	f(CASTxB6)-cM/Mb	-0.139659	0.18682	-0.220453	0.14238	-0.245131	0.26444	-0.276648	0.26492		0	0	0	0	0	f(CASTxB6)-cM/Mb	o
	m(B6xCAST)-cM/Mb	-0.0816551	0.45364	-0.133542	0.3913	-0.161558	0.48439	-0.103755	0.689		0	0	0	0	0	m(B6xCAST)-cM/Mb	o
	m(CASTxB6)-cM/Mb	-0.0960281	0.37649	-0.130318	0.40239	-0.199452	0.37591	-0.123618	0.61962		0	0	0	0	0	m(CASTxB6)-cM/Mb	o
	female-cM/Mb	-0.154412	0.14492	-0.255877	0.0865301	-0.300373	0.16585	-0.328129	0.17975		0	0	0	0	0	female-cM/Mb	o
	male-cM/Mb	-0.0979551	0.36686	-0.139499	0.3706	-0.187211	0.41439	-0.127578	0.61005		0	0	0	0	0	male-cM/Mb	o
	ave-cM/Mb	-0.145877	0.1714	-0.229207	0.12774	-0.283261	0.19313	-0.290906	0.23746		0	0	0	0	0	ave-cM/Mb	o
11.7-21.7	f(B6xCAST)-cM	-0.0225881	0.83718	0.0358411	0.80849	0.277492	0.1713	0.185899	0.41825		0	0	0	0	0	f(B6xCAST)-cM	p
	f(CASTxB6)-cM	-0.0244111	0.82145	0.0073531	0.96121	0.169276	0.42595	0.0002761	0.9991		0	0	0	0	0	f(CASTxB6)-cM	p
	m(B6xCAST)-cM	0.0534141	0.62036	0.0399241	0.79456	0.0575111	0.8169	0.0604621	0.82036		0	0	0	0	0	m(B6xCAST)-cM	p
	m(CASTxB6)-cM	0.0928091	0.31383	0.0980821	0.50824	0.150657	0.51434	0.0897311	0.71458		0	0	0	0	0	m(CASTxB6)-cM	p
	female-cM	-0.0236841	0.83145	0.0215221	0.88533	0.22329	0.28515	0.0905021	0.70185		0	0	0	0	0	female-cM	p
	male-cM	0.0721521	0.45898	0.0675151	0.6574	0.0994051	0.67264	0.0744351	0.76575		0	0	0	0	0	male-cM	p
	ave-cM	0.0244171	0.8142	0.0509531	0.72835	0.185375	0.39049	0.0982991	0.69032		0	0	0	0	0	ave-cM	p
11.7-21.7	f(B6xCAST)-cM/Mb	-0.0225881	0.83303	0.0358421	0.80915	0.277492	0.17184	0.185899	0.41792		0	0	0	0	0	f(B6xCAST)-cM/Mb	p
	f(CASTxB6)-cM/Mb	-0.0244111	0.82187	0.0073531	0.95928	0.169276	0.4262	0.0002761	0.99912		0	0	0	0	0	f(CASTxB6)-cM/Mb	p
	m(B6xCAST)-cM/Mb	0.0534141	0.61975	0.0399241	0.79458	0.0575111	0.81647	0.0604621	0.82237		0	0	0	0	0	m(B6xCAST)-cM/Mb	p
	m(CASTxB6)-cM/Mb	0.0928101	0.3163	0.0980821	0.51034	0.150657	0.51346	0.0897311	0.71257		0	0	0	0	0	m(CASTxB6)-cM/Mb	p
	female-cM/Mb	-0.0236841	0.83017	0.0215221	0.88329	0.22329	0.28533	0.0905021	0.7021		0	0	0	0	0	female-cM/Mb	p
	male-cM/Mb	0.0721521	0.45678	0.0675151	0.65839	0.0994051	0.67636	0.0744351	0.76737		0	0	0	0	0	male-cM/Mb	p
	ave-cM/Mb	0.0244171	0.81495	0.0509531	0.72983	0.185375	0.38984	0.0982991	0.69171		0	0	0	0	0	ave-cM/Mb	p
21.7-31.7	f(B6xCAST)-cM	-0.127245	0.20152	-0.243291	0.0841201	-0.27125	0.17843	-0.212698	0.36673		0	0	0	0	0	f(B6xCAST)-cM	q
	f(CASTxB6)-cM	-0.0829261	0.41251	-0.216284	0.12105	-0.20815	0.28224	-0.193152	0.42138		0	0	0	0	0	f(CASTxB6)-cM	q
	m(B6xCAST)-cM	0.0374071	0.71261	0.0870101	0.54384	0.116996	0.57103	0.261945	0.25844		0	0	0	0	0	m(B6xCAST)-cM	q
	m(CASTxB6)-cM	-0.0840741	0.40343	-0.121264	0.39572	-0.111576	0.5798	-0.0331421	0.89899		0	0	0	0	0	m(CASTxB6)-cM	q
	female-cM	-0.109779	0.26583	-0.239988	0.0865401	-0.24331	0.21479	-0.208021	0.37831		0	0	0	0	0	female-cM	q
	male-cM	-0.0229631	0.82348	-0.0104231	0.94325	0.0192481	0.93068	0.152247	0.52466		0	0	0	0	0	male-cM	q
	ave-cM	-0.0803701	0.42471	-0.158781	0.26073	-0.151666	0.44636	-0.0741611	0.76108		0	0	0	0	0	ave-cM	q
21.7-31.7	f(B6xCAST)-cM/Mb	-0.127245	0.20067	-0.243291	0.0860301	-0.27125	0.17535	-0.212698	0.36726		0	0	0	0	0	f(B6xCAST)-cM/Mb	q
	f(CASTxB6)-cM/Mb	-0.0829261	0.41483	-0.216284	0.12143	-0.20815	0.28144	-0.193153	0.42187		0	0	0	0	0	f(CASTxB6)-cM/Mb	q
	m(B6xCAST)-cM/Mb	0.0374071	0.7125	0.0870101	0.54138	0.116996	0.56719	0.261945	0.25932		0	0	0	0	0	m(B6xCAST)-cM/Mb	q
	m(CASTxB6)-cM/Mb	-0.0840751	0.40368	-0.121263	0.39552	-0.111576	0.58069	-0.0331411	0.8956		0	0	0	0	0	m(CASTxB6)-cM/Mb	q
	female-cM/Mb	-0.109779	0.26898	-0.239988	0.0854201	-0.243311	0.21463	-0.208021	0.37985		0	0	0	0	0	female-cM/Mb	q
	male-cM/Mb	-0.0229641	0.82097	-0.0104221	0.94356	0.0192491	0.9304	0.152247	0.52423		0	0	0	0	0	male-cM/Mb	q
	ave-cM/Mb	-0.0803701	0.42414	-0.158781	0.26249	-0.151667	0.44627	-0.0741611	0.76261		0	0	0	0	0	ave-cM/Mb	q
31.7-41.7	f(B6xCAST)-cM	-0.0708301	0.38715	-0.0420681	0.77764	-0.0625971	0.77045	-0.197052	0.36477		0	0	0	0	0	f(B6xCAST)-cM	r
	f(CASTxB6)-cM	-0.0721721	0.38461	-0.0286571	0.84379	-0.0449451	0.82992	-0.217476	0.32932		0	0	0	0	0	f(CASTxB6)-cM	r
	m(B6xCAST)-cM	-0.0239681	0.78391	-0.0710421	0.60613	0.10113	0.63317	-0.0064121	0.97804		0	0	0	0	0	m(B6xCAST)-cM	r
	m(CASTxB6)-cM	-0.0670231	0.4524	-0.0948691	0.50528	-0.0778361	0.7219	-0.131882	0.58853		0	0	0	0	0	m(CASTxB6)-cM	r
	female-cM	-0.0737511	0.36889	-0.0366091	0.80814	-0.0555801	0.79542	-0.211542	0.34558		0	0	0	0	0	female-cM	r
	male-cM	-0.0472801	0.60076	-0.0871561	0.53628	0.0143541	0.94683	-0.0726481	0.76278		0	0	0	0	0	male-cM	r
	ave-cM	-0.0643621	0.45399	-0.0621791	0.6601	-0.0223801	0.91558	-0.147472	0.53463		0	0	0	0	0	ave-cM	r
31.7-41.7	f(B6xCAST)-cM/Mb	-0.0708301	0.38715	-0.0420681	0.77806	-0.0625971	0.77047	-0.197052	0.36394		0	0	0	0	0	f(B6xCAST)-cM/Mb	r
	f(CASTxB6)-cM/Mb	-0.0721721	0.38385	-0.0286571	0.84405	-0.0449441	0.82805	-0.217476	0.32701		0	0	0	0	0	f(CASTxB6)-cM/Mb	r
	m(B6xCAST)-cM/Mb	-0.0239681	0.78233	-0.0710421	0.60604	0.10113	0.63147	-0.0064111	0.97819		0	0	0	0	0	m(B6xCAST)-cM/Mb	r
	m(CASTxB6)-cM/Mb	-0.0670231	0.45255	-0.0948691	0.51052	-0.0778361	0.72079	-0.131882	0.58795		0	0	0	0	0	m(CASTxB6)-cM/Mb	r
	female-cM/Mb	-0.0737501	0.37343	-0.0366091	0.8086	-0.0555801	0.79325	-0.211542	0.34582		0	0	0	0	0	female-cM/Mb	r
	male-cM/Mb	-0.0472801	0.59571	-0.0871551	0.53511	0.0143541	0.94695	-0.0726481	0.76326		0	0	0	0	0	male-cM/Mb	r
	ave-cM/Mb	-0.0643621	0.45189	-0.0621791	0.66048	-0.0223801	0.91672	-0.147472	0.53329		0	0	0	0	0	ave-cM/Mb	r
41.7-51.7	f(B6xCAST)-cM	-0.0814681	0.41995	-0.108938	0.45335	-0.0112191	0.95769	-0.127447	0.60208		0	0	0	0	0	f(B6xCAST)-cM	s
	f(CASTxB6)-cM	-0.0693551	0.4887	-0.112144	0.44405	-0.127891	0.55145	-0.0621361	0.79558		0	0	0	0	0	f(CASTxB6)-cM	s
	m(B6xCAST)-cM	0.0788641	0.43567	0.128815	0.37818	0.258992	0.2136	0.330464	0.15427		0	0	0	0	0	m(B6xCAST)-cM	s
	m(CASTxB6)-cM	0.0695001	0.4959	0.11225	0.44554	0.220997	0.29042	0.342332	0.13962		0	0	0	0	0	m(CASTxB6)-cM	s
	female-cM	-0.0821661	0.41677	-0.120782	0.40625	-0.0788291	0.71533	-0.100731	0.67902		0	0	0	0	0	female-cM	s
	male-cM	0.0744991	0.46541	0.120845	0.40977	0.239759	0.25064	0.338691	0.14231		0	0	0	0	0	male-cM	s
	ave-cM	0.0265871	0.79579	0.0484671	0.74412	0.1543	0.47181	0.210625	0.38776		0	0	0	0	0	ave-cM	s
41.7-51.7	f(B6xCAST)-cM/Mb	-0.0814681	0.41716	-0.108938	0.45365	-0.0112191	0.9579	-0.127447	0.60186		0	0	0	0	0	f(B6xCAST)-cM/Mb	s
	f(CASTxB6)-cM/Mb	-0.0693551	0.49203	-0.112145	0.44251	-0.127891	0.55114	-0.0621361	0.79498		0	0	0	0	0	f(CASTxB6)-cM/Mb	s
	m(B6xCAST)-cM/Mb	0.0788641	0.43619	0.128815	0.37886	0.258992	0.21122	0.330464	0.15541		0	0	0	0	0	m(B6xCAST)-cM/Mb	s
	m(CASTxB6)-cM/Mb	0.0695001	0.50033	0.11225	0.44573	0.220996	0.29357	0.342332	0.13769		0	0	0	0	0	m(CASTxB6)-cM/Mb	s
	female-cM/Mb	-0.0821661	0.41653	-0.120783	0.40491	-0.0788301	0.71281	-0.100731	0.67763		0	0	0	0	0	female-cM/Mb	s
	male-cM/Mb	0.0744991	0.46642	0.120845	0.41064	0.23976	0.25067	0.338691	0.14418		0	0	0	0	0	male-cM/Mb	s
	ave-cM/Mb	0.0265871	0.79672	0.0484671	0.74323	0.1543	0.46907	0.210625	0.38591		0	0	0	0	0	ave-cM/Mb	s
51.7-61.7	f(B6xCAST)-cM	-0.119606	0.23583	-0.184452	0.20065	-0.182797	0.37637	-0.138759	0.561		0	0	0	0	0	f(B6xCAST)-cM	t
	f(CASTxB6)-cM	-0.135799	0.16696	-0.196926	0.16936	-0.155342	0.46379	-0.0948061	0.6948		0	0	0	0	0	f(CASTxB6)-cM	t
	m(B6xCAST)-cM	-0.165478	0.0913801	-0.251489	0.0754201	-0.225728	0.28608	-0.279037	0.23837		0	0	0	0	0	m(B6xCAST)-cM	t
	m(CASTxB6)-cM	-0.0852381	0.40007	-0.113937	0.43282	-0.0605781	0.7759	-0.0650611	0.78617		0	0	0	0	0	m(CASTxB6)-cM	t
	female-cM	-0.138144	0.16118	-0.202505	0.15891	-0.179336	0.39379	-0.124129	0.60633		0	0	0	0	0	female-cM	t
	male-cM	-0.120005	0.23008	-0.172263	0.23208	-0.127741	0.54654	-0.154174	0.51664		0	0	0	0	0	male-cM	t
	ave-cM	-0.137321	0.16299	-0.201255	0.15993	-0.168526	0.42897	-0.17019	0.47581		0	0	0	0	0	ave-cM	t
51.7-61.7	f(B6xCAST)-cM/Mb	-0.119607	0.23454	-0.184452	0.19953	-0.182798	0.38086	-0.138759	0.56296		0	0	0	0	0	f(B6xCAST)-cM/Mb	t
	f(CASTxB6)-cM/Mb	-0.135799	0.16599	-0.196926	0.16892	-0.155342	0.4639	-0.0948061	0.69759		0	0	0	0	0	f(CASTxB6)-cM/Mb	t
	m(B6xCAST)-cM/Mb	-0.165477	0.0903501	-0.251489	0.0751301	-0.225728	0.28281	-0.279037	0.23575		0	0	0	0	0	m(B6xCAST)-cM/Mb	t
	m(CASTxB6)-cM/Mb	-0.0852381	0.40077	-0.113937	0.43381	-0.0605781	0.77795	-0.0650611	0.78604		0	0	0	0	0	m(CASTxB6)-cM/Mb	t
	female-cM/Mb	-0.138144	0.16141	-0.202506	0.15491	-0.179336	0.39683	-0.124128	0.60479		0	0	0	0	0	female-cM/Mb	t
	male-cM/Mb	-0.120005	0.2289	-0.172263	0.2341	-0.127741	0.54297	-0.154174	0.51548		0	0	0	0	0	male-cM/Mb	t
	ave-cM/Mb	-0.137321	0.16508	-0.201255	0.15925	-0.168526	0.42675	-0.170191	0.47687		0	0	0	0	0	ave-cM/Mb	t
61.7-71.7	f(B6xCAST)-cM	-0.184604	0.0568801	-0.2549	0.0662801	-0.31574	0.10507	-0.417616	0.0520501		0	0	0	0	0	f(B6xCAST)-cM	u
	f(CASTxB6)-cM	-0.156289	0.10875	-0.219906	0.11523	-0.26115	0.1886	-0.365377	0.0939301		0	0	0	0	0	f(CASTxB6)-cM	u
	m(B6xCAST)-cM	-0.0355691	0.71645	-0.0747001	0.59147	-0.0763191	0.71702	-0.0838521	0.724		0	0	0	0	0	m(B6xCAST)-cM	u
	m(CASTxB6)-cM	-0.0067451	0.94635	-0.0303771	0.83729	-0.0195291	0.92439	-0.0149801	0.95026		0	0	0	0	0	m(CASTxB6)-cM	u
	female-cM	-0.182502	0.0605701	-0.256259	0.0659101	-0.306516	0.11988	-0.415652	0.0565801		0	0	0	0	0	female-cM	u
	male-cM	-0.0201201	0.84276	-0.0504701	0.72657	-0.0455701	0.82647	-0.0469621	0.8427		0	0	0	0	0	male-cM	u
	ave-cM	-0.0915581	0.33584	-0.146989	0.28369	-0.179359	0.39206	-0.233557	0.32609		0	0	0	0	0	ave-cM	u
61.7-71.7	f(B6xCAST)-cM/Mb	-0.184604	0.0555801	-0.2549	0.0671601	-0.31574	0.10623	-0.417615	0.0511701		0	0	0	0	0	f(B6xCAST)-cM/Mb	u
	f(CASTxB6)-cM/Mb	-0.156289	0.10873	-0.219906	0.11462	-0.26115	0.18909	-0.365378	0.0961401		0	0	0	0	0	f(CASTxB6)-cM/Mb	u
	m(B6xCAST)-cM/Mb	-0.0355691	0.71442	-0.0747001	0.59325	-0.0763201	0.71854	-0.0838521	0.72218		0	0	0	0	0	m(B6xCAST)-cM/Mb	u
	m(CASTxB6)-cM/Mb	-0.0067451	0.94856	-0.0303771	0.83813	-0.0195281	0.92341	-0.0149801	0.95045		0	0	0	0	0	m(CASTxB6)-cM/Mb	u
	female-cM/Mb	-0.182501	0.0591301	-0.256259	0.0651101	-0.306517	0.11787	-0.415652	0.0589901		0	0	0	0	0	female-cM/Mb	u
	male-cM/Mb	-0.0201201	0.844	-0.0504701	0.72441	-0.0455701	0.82796	-0.0469621	0.84306		0	0	0	0	0	male-cM/Mb	u
	ave-cM/Mb	-0.0915581	0.33394	-0.146989	0.28249	-0.179359	0.38821	-0.233557	0.3236		0	0	0	0	0	ave-cM/Mb	u
71.7-81.7	f(B6xCAST)-cM	-0.0504651	0.61611	-0.136326	0.33756	-0.318857	0.12724	-0.434188	0.0584301		0	0	0	0	0	f(B6xCAST)-cM	v
	f(CASTxB6)-cM	-0.0599481	0.55326	-0.112206	0.43985	-0.274785	0.19148	-0.206033	0.39208		0	0	0	0	0	f(CASTxB6)-cM	v
	m(B6xCAST)-cM	0.237608	0.0231201	0.280225	0.0507301	0.270208	0.19206	0.143185	0.53706		111111	0	0	0	111111	m(B6xCAST)-cM	v
	m(CASTxB6)-cM	0.0886811	0.36898	0.0483171	0.73854	0.0521091	0.80489	0.0082621	0.97138		0	0	0	0	0	m(CASTxB6)-cM	v
	female-cM	-0.0602401	0.54923	-0.139883	0.32787	-0.312954	0.1353	-0.366058	0.11406		0	0	0	0	0	female-cM	v
	male-cM	0.174715	0.0756701	0.183958	0.20142	0.177915	0.39554	0.0808361	0.72672		0	0	0	0	0	male-cM	v
	ave-cM	0.0482181	0.63393	-0.0019311	0.98943	-0.121061	0.57266	-0.20866	0.38598		0	0	0	0	0	ave-cM	v
71.7-81.7	f(B6xCAST)-cM/Mb	-0.0504651	0.61549	-0.136326	0.34033	-0.318857	0.12796	-0.434188	0.0585901		0	0	0	0	0	f(B6xCAST)-cM/Mb	v
	f(CASTxB6)-cM/Mb	-0.0599471	0.55435	-0.112206	0.44129	-0.274784	0.18889	-0.206032	0.38982		0	0	0	0	0	f(CASTxB6)-cM/Mb	v
	m(B6xCAST)-cM/Mb	0.237608	0.0231301	0.280225	0.0498701	0.270208	0.1934	0.143185	0.53808		111111	111111	0	0	222222	m(B6xCAST)-cM/Mb	v
	m(CASTxB6)-cM/Mb	0.0886821	0.36965	0.0483171	0.73857	0.0521101	0.80454	0.0082621	0.97076		0	0	0	0	0	m(CASTxB6)-cM/Mb	v
	female-cM/Mb	-0.0602401	0.54754	-0.139883	0.33392	-0.312954	0.13306	-0.366058	0.11569		0	0	0	0	0	female-cM/Mb	v
	male-cM/Mb	0.174715	0.0755601	0.183958	0.19827	0.177914	0.3956	0.0808361	0.72609		0	0	0	0	0	male-cM/Mb	v
	ave-cM/Mb	0.0482171	0.63265	-0.0019311	0.9894	-0.121062	0.57166	-0.208661	0.38792		0	0	0	0	0	ave-cM/Mb	v
81.7-91.7	f(B6xCAST)-cM	-0.170109	0.0820801	-0.0571141	0.70129	-0.160234	0.44722	-0.0764321	0.7487		0	0	0	0	0	f(B6xCAST)-cM	w
	f(CASTxB6)-cM	-0.135378	0.1746	-0.0284091	0.8497	-0.116429	0.58523	-0.0904581	0.7296		0	0	0	0	0	f(CASTxB6)-cM	w
	m(B6xCAST)-cM	0.0065031	0.95049	0.162175	0.2662	0.141656	0.50535	0.181421	0.45095		0	0	0	0	0	m(B6xCAST)-cM	w
	m(CASTxB6)-cM	-0.0721921	0.49225	0.0386251	0.80797	-0.0579391	0.80234	0.0447341	0.87518		0	0	0	0	0	m(CASTxB6)-cM	w
	female-cM	-0.157823	0.10612	-0.0444941	0.764	-0.144894	0.4947	-0.0870361	0.72628		0	0	0	0	0	female-cM	w
	male-cM	-0.0482561	0.64634	0.0863851	0.56666	0.0125431	0.95715	0.0929011	0.72731		0	0	0	0	0	male-cM	w
	ave-cM	-0.118312	0.24214	0.0094421	0.94937	-0.0889051	0.68517	-0.0163631	0.95191		0	0	0	0	0	ave-cM	w
81.7-91.7	f(B6xCAST)-cM/Mb	-0.170109	0.0814501	-0.0571141	0.69903	-0.160234	0.44476	-0.0764311	0.75049		0	0	0	0	0	f(B6xCAST)-cM/Mb	w
	f(CASTxB6)-cM/Mb	-0.135378	0.17377	-0.0284091	0.84978	-0.116429	0.58466	-0.0904581	0.73334		0	0	0	0	0	f(CASTxB6)-cM/Mb	w
	m(B6xCAST)-cM/Mb	0.0065031	0.95071	0.162175	0.26408	0.141656	0.5049	0.181422	0.44817		0	0	0	0	0	m(B6xCAST)-cM/Mb	w
	m(CASTxB6)-cM/Mb	-0.0721921	0.49225	0.0386251	0.80753	-0.0579391	0.80475	0.0447341	0.87704		0	0	0	0	0	m(CASTxB6)-cM/Mb	w
	female-cM/Mb	-0.157823	0.10564	-0.0444941	0.76598	-0.144894	0.49278	-0.0870371	0.72542		0	0	0	0	0	female-cM/Mb	w
	male-cM/Mb	-0.0482561	0.6448	0.0863851	0.56735	0.0125431	0.95645	0.0929011	0.72859		0	0	0	0	0	male-cM/Mb	w
	ave-cM/Mb	-0.118312	0.24232	0.0094421	0.94945	-0.0889051	0.68306	-0.0163641	0.95213		0	0	0	0	0	ave-cM/Mb	w
91.7-101.7	f(B6xCAST)-cM	0.0047921	0.96242	0.0348541	0.81217	-0.0243911	0.91019	-0.0228781	0.92506		0	0	0	0	0	f(B6xCAST)-cM	x
	f(CASTxB6)-cM	-0.0505621	0.61746	-0.0179941	0.90201	-0.0459401	0.82784	-0.112533	0.63608		0	0	0	0	0	f(CASTxB6)-cM	x
	m(B6xCAST)-cM	0.0513091	0.61002	0.181573	0.20825	0.333618	0.10366	0.489998	0.0257901		0	0	0	111111	111111	m(B6xCAST)-cM	x
	m(CASTxB6)-cM	0.142674	0.1557	0.204209	0.15144	0.437333	0.0270501	0.483475	0.0243501		0	0	111111	111111	222222	m(CASTxB6)-cM	x
	female-cM	-0.0254091	0.80259	0.0082861	0.95563	-0.0366551	0.86365	-0.0648381	0.78677		0	0	0	0	0	female-cM	x
	male-cM	0.105814	0.29384	0.204953	0.15149	0.415524	0.0373501	0.517385	0.0152601		0	0	111111	111111	222222	male-cM	x
	ave-cM	0.0489031	0.62937	0.122736	0.39621	0.229626	0.26724	0.278631	0.23149		0	0	0	0	0	ave-cM	x
91.7-101.7	f(B6xCAST)-cM/Mb	0.0047921	0.96327	0.0348541	0.81205	-0.0243911	0.9115	-0.0228781	0.92634		0	0	0	0	0	f(B6xCAST)-cM/Mb	x
	f(CASTxB6)-cM/Mb	-0.0505621	0.61964	-0.0179941	0.90122	-0.0459401	0.826	-0.112533	0.63764		0	0	0	0	0	f(CASTxB6)-cM/Mb	x
	m(B6xCAST)-cM/Mb	0.0513081	0.61196	0.181572	0.20569	0.333617	0.10313	0.489998	0.0253701		0	0	0	111111	111111	m(B6xCAST)-cM/Mb	x
	m(CASTxB6)-cM/Mb	0.142674	0.15698	0.204209	0.15325	0.437333	0.0274901	0.483474	0.0237501		0	0	111111	111111	222222	m(CASTxB6)-cM/Mb	x
	female-cM/Mb	-0.0254091	0.80479	0.0082861	0.95505	-0.0366551	0.86361	-0.0648381	0.78685		0	0	0	0	0	female-cM/Mb	x
	male-cM/Mb	0.105814	0.29222	0.204953	0.15014	0.415524	0.0376401	0.517385	0.0155501		0	0	111111	111111	222222	male-cM/Mb	x
	ave-cM/Mb	0.0489021	0.63135	0.122736	0.3965	0.229626	0.27016	0.27863	0.22725		0	0	0	0	0	ave-cM/Mb	x
101.7-111.7	f(B6xCAST)-cM	0.0926761	0.33539	0.146971	0.27413	0.178721	0.34697	0.0498681	0.84534		0	0	0	0	0	f(B6xCAST)-cM	y
	f(CASTxB6)-cM	0.0604451	0.55382	0.131291	0.35869	0.151966	0.46698	-0.0122161	0.95875		0	0	0	0	0	f(CASTxB6)-cM	y
	m(B6xCAST)-cM	-0.0662371	0.52028	-0.0510111	0.73365	-0.118303	0.56374	-0.185988	0.45732		0	0	0	0	0	m(B6xCAST)-cM	y
	m(CASTxB6)-cM	0.0478061	0.63889	0.0918521	0.50374	0.0538001	0.76885	0.0784461	0.76111		0	0	0	0	0	m(CASTxB6)-cM	y
	female-cM	0.0861551	0.38038	0.149457	0.27303	0.177074	0.36953	0.0267961	0.91206		0	0	0	0	0	female-cM	y
	male-cM	-0.0052701	0.95955	0.0266571	0.8463	-0.0273041	0.88184	-0.0373491	0.88521		0	0	0	0	0	male-cM	y
	ave-cM	0.0232541	0.82287	0.0662161	0.63363	0.0404131	0.82571	-0.0162971	0.94994		0	0	0	0	0	ave-cM	y
101.7-111.7	f(B6xCAST)-cM/Mb	0.0926761	0.33939	0.146971	0.27275	0.178721	0.34728	0.0498681	0.84399		0	0	0	0	0	f(B6xCAST)-cM/Mb	y
	f(CASTxB6)-cM/Mb	0.0604451	0.55325	0.131291	0.35928	0.151966	0.4702	-0.0122161	0.95869		0	0	0	0	0	f(CASTxB6)-cM/Mb	y
	m(B6xCAST)-cM/Mb	-0.0662371	0.52146	-0.0510111	0.73558	-0.118303	0.56496	-0.185988	0.4544		0	0	0	0	0	m(B6xCAST)-cM/Mb	y
	m(CASTxB6)-cM/Mb	0.0478061	0.64049	0.0918521	0.50306	0.0538001	0.77159	0.0784461	0.76333		0	0	0	0	0	m(CASTxB6)-cM/Mb	y
	female-cM/Mb	0.0861551	0.37795	0.149457	0.27665	0.177074	0.3652	0.0267961	0.91449		0	0	0	0	0	female-cM/Mb	y
	male-cM/Mb	-0.0052701	0.95989	0.0266571	0.84782	-0.0273041	0.88082	-0.0373491	0.88659		0	0	0	0	0	male-cM/Mb	y
	ave-cM/Mb	0.0232541	0.82207	0.0662161	0.63308	0.0404141	0.82324	-0.0162971	0.94922		0	0	0	0	0	ave-cM/Mb	y
111.7-121.7	f(B6xCAST)-cM	-0.181732	0.0587701	-0.26414	0.0569301	-0.34361	0.0870601	-0.344119	0.11474		0	0	0	0	0	f(B6xCAST)-cM	z
	f(CASTxB6)-cM	-0.176378	0.0681601	-0.264723	0.0607701	-0.34926	0.0811601	-0.290171	0.15752		0	0	0	0	0	f(CASTxB6)-cM	z
	m(B6xCAST)-cM	-0.0735741	0.46632	-0.14999	0.29773	-0.202777	0.32869	-0.151421	0.52669		0	0	0	0	0	m(B6xCAST)-cM	z
	m(CASTxB6)-cM	-0.0211551	0.83708	-0.0881861	0.5434	-0.137232	0.52757	-0.0938361	0.70174		0	0	0	0	0	m(CASTxB6)-cM	z
	female-cM	-0.183947	0.0567101	-0.272736	0.0531801	-0.357731	0.0793301	-0.317188	0.12574		0	0	0	0	0	female-cM	z
	male-cM	-0.0496821	0.62532	-0.126105	0.38861	-0.179317	0.40249	-0.128819	0.59719		0	0	0	0	0	male-cM	z
	ave-cM	-0.120808	0.22662	-0.213985	0.13391	-0.293876	0.15523	-0.245342	0.28975		0	0	0	0	0	ave-cM	z
111.7-121.7	f(B6xCAST)-cM/Mb	-0.181732	0.0586101	-0.26414	0.0569701	-0.343611	0.0882901	-0.344118	0.11333		0	0	0	0	0	f(B6xCAST)-cM/Mb	z
	f(CASTxB6)-cM/Mb	-0.176379	0.0671701	-0.264723	0.0600401	-0.34926	0.0831801	-0.290171	0.15543		0	0	0	0	0	f(CASTxB6)-cM/Mb	z
	m(B6xCAST)-cM/Mb	-0.0735741	0.46476	-0.14999	0.29871	-0.202778	0.328	-0.151421	0.52897		0	0	0	0	0	m(B6xCAST)-cM/Mb	z
	m(CASTxB6)-cM/Mb	-0.0211551	0.83588	-0.0881851	0.54496	-0.137232	0.52643	-0.0938361	0.70107		0	0	0	0	0	m(CASTxB6)-cM/Mb	z
	female-cM/Mb	-0.183947	0.0550601	-0.272736	0.0515901	-0.357731	0.0776801	-0.317188	0.12298		0	0	0	0	0	female-cM/Mb	z
	male-cM/Mb	-0.0496821	0.62586	-0.126105	0.38783	-0.179317	0.40043	-0.128818	0.59634		0	0	0	0	0	male-cM/Mb	z
	ave-cM/Mb	-0.120808	0.22873	-0.213986	0.1334	-0.293876	0.15579	-0.245342	0.29121		0	0	0	0	0	ave-cM/Mb	z

## Sheet: DNA
section (Mbp position)	cross	100.cor	100.sig	200.cor	200.sig	400.cor	400.sig	500.cor	500.sig	111111	100kb	200kb	400kb	500kb	SUM	cross	section
3-13	f(B6xCAST)-cM	0.0600001	0.55624	0.200582	0.15686	0.0609721	0.7645	-0.106253	0.65706		0	0	0	0	0	f(B6xCAST)-cM	A
	f(CASTxB6)-cM	0.0122651	0.90265	0.104328	0.46141	-0.0376671	0.8452	-0.198541	0.39936		0	0	0	0	0	f(CASTxB6)-cM	A
	m(B6xCAST)-cM	0.275781	0.0061601	0.374341	0.0108701	0.294002	0.14341	0.177468	0.45023		111111	111111	0	0	222222	m(B6xCAST)-cM	A
	m(CASTxB6)-cM	0.226761	0.0227001	0.470553	0.0013501	0.442192	0.0290201	0.281816	0.23215		111111	111111	111111	0	333333	m(CASTxB6)-cM	A
	female-cM	0.0335061	0.7419	0.150096	0.29133	0.0045491	0.98157	-0.163175	0.4896		0	0	0	0	0	female-cM	A
	male-cM	0.280647	0.0053001	0.44008	0.0033301	0.376523	0.0599901	0.250346	0.28965		111111	111111	0	0	222222	male-cM	A
	ave-cM	0.121898	0.22009	0.273238	0.0515001	0.136276	0.50004	-0.0451641	0.85118		0	0	0	0	0	ave-cM	A
3-13	f(B6xCAST)-cM/Mb	0.0600001	0.55145	0.200582	0.15784	0.0609731	0.7669	-0.106253	0.65929		0	0	0	0	0	f(B6xCAST)-cM/Mb	A
	f(CASTxB6)-cM/Mb	0.0122661	0.90377	0.104328	0.46604	-0.0376681	0.84413	-0.198541	0.40164		0	0	0	0	0	f(CASTxB6)-cM/Mb	A
	m(B6xCAST)-cM/Mb	0.275781	0.0062801	0.374341	0.0108601	0.294002	0.14353	0.177469	0.44828		111111	111111	0	0	222222	m(B6xCAST)-cM/Mb	A
	m(CASTxB6)-cM/Mb	0.226761	0.0226701	0.470553	0.0014701	0.442191	0.0277401	0.281816	0.23146		111111	111111	111111	0	333333	m(CASTxB6)-cM/Mb	A
	female-cM/Mb	0.0335061	0.74452	0.150096	0.29362	0.0045491	0.98092	-0.163175	0.48862		0	0	0	0	0	female-cM/Mb	A
	male-cM/Mb	0.280647	0.0054201	0.44008	0.0033401	0.376523	0.0602401	0.250345	0.2913		111111	111111	0	0	222222	male-cM/Mb	A
	ave-cM/Mb	0.121897	0.22362	0.273238	0.0509901	0.136276	0.50423	-0.0451641	0.85056		0	0	0	0	0	ave-cM/Mb	A
13-23	f(B6xCAST)-cM	0.0845721	0.3907	0.294036	0.0326601	0.318361	0.12732	0.282961	0.2485		0	111111	0	0	111111	f(B6xCAST)-cM	B
	f(CASTxB6)-cM	0.0223911	0.82668	0.221646	0.11828	0.23923	0.25865	0.185494	0.45658		0	0	0	0	0	f(CASTxB6)-cM	B
	m(B6xCAST)-cM	0.252094	0.0226501	0.287483	0.0425701	0.463469	0.0096201	0.306276	0.18885		111111	111111	111111	0	333333	m(B6xCAST)-cM	B
	m(CASTxB6)-cM	0.163155	0.0861401	0.23801	0.0911301	0.423367	0.0266301	0.274376	0.25434		0	0	111111	0	111111	m(CASTxB6)-cM	B
	female-cM	0.0529411	0.59884	0.259481	0.0600301	0.279696	0.186	0.235325	0.3456		0	0	0	0	0	female-cM	B
	male-cM	0.217642	0.0352601	0.269875	0.0542401	0.453748	0.0119701	0.297124	0.2082		111111	0	111111	0	222222	male-cM	B
	ave-cM	0.1524	0.11262	0.310533	0.0265801	0.443231	0.0242701	0.327876	0.15865		0	111111	111111	0	222222	ave-cM	B
13-23	f(B6xCAST)-cM/Mb	0.0845721	0.38722	0.294036	0.0330001	0.318361	0.12684	0.282961	0.24988		0	111111	0	0	111111	f(B6xCAST)-cM/Mb	B
	f(CASTxB6)-cM/Mb	0.0223911	0.82608	0.221646	0.11605	0.23923	0.25872	0.185494	0.458		0	0	0	0	0	f(CASTxB6)-cM/Mb	B
	m(B6xCAST)-cM/Mb	0.252094	0.0228101	0.287483	0.0428701	0.463469	0.0093501	0.306276	0.18937		111111	111111	111111	0	333333	m(B6xCAST)-cM/Mb	B
	m(CASTxB6)-cM/Mb	0.163155	0.0894101	0.23801	0.0876901	0.423367	0.0259001	0.274376	0.25348		0	0	111111	0	111111	m(CASTxB6)-cM/Mb	B
	female-cM/Mb	0.0529411	0.59673	0.259481	0.0608901	0.279697	0.18604	0.235326	0.34464		0	0	0	0	0	female-cM/Mb	B
	male-cM/Mb	0.217642	0.0338201	0.269874	0.0548701	0.453748	0.0119401	0.297124	0.21025		111111	0	111111	0	222222	male-cM/Mb	B
	ave-cM/Mb	0.152401	0.11348	0.310534	0.0256301	0.443231	0.0252701	0.327876	0.15838		0	111111	111111	0	222222	ave-cM/Mb	B
23-33	f(B6xCAST)-cM	0.0422431	0.67732	-0.109277	0.44912	-0.0546711	0.80045	-0.0214261	0.9263		0	0	0	0	0	f(B6xCAST)-cM	C
	f(CASTxB6)-cM	0.0553461	0.58056	-0.0515101	0.72116	-0.0138581	0.95177	-0.0086081	0.97124		0	0	0	0	0	f(CASTxB6)-cM	C
	m(B6xCAST)-cM	0.191342	0.0591401	0.239533	0.0994301	0.380229	0.0619501	0.321474	0.17881		0	0	0	0	0	m(B6xCAST)-cM	C
	m(CASTxB6)-cM	0.0797361	0.42864	0.0178521	0.90303	0.168873	0.4281	0.123377	0.60556		0	0	0	0	0	m(CASTxB6)-cM	C
	female-cM	0.0514231	0.60946	-0.0827521	0.56573	-0.0334531	0.88139	-0.0148641	0.95021		0	0	0	0	0	female-cM	C
	male-cM	0.145531	0.14977	0.140136	0.34289	0.294396	0.16129	0.234469	0.3269		0	0	0	0	0	male-cM	C
	ave-cM	0.0988531	0.32502	0.0220381	0.87929	0.129892	0.54205	0.103947	0.66063		0	0	0	0	0	ave-cM	C
23-33	f(B6xCAST)-cM/Mb	0.0422431	0.67582	-0.109277	0.44445	-0.0546701	0.80139	-0.0214261	0.92642		0	0	0	0	0	f(B6xCAST)-cM/Mb	C
	f(CASTxB6)-cM/Mb	0.0553451	0.57957	-0.0515101	0.72113	-0.0138581	0.95144	-0.0086081	0.9714		0	0	0	0	0	f(CASTxB6)-cM/Mb	C
	m(B6xCAST)-cM/Mb	0.191342	0.0586401	0.239533	0.0999201	0.380229	0.0627801	0.321474	0.17562		0	0	0	0	0	m(B6xCAST)-cM/Mb	C
	m(CASTxB6)-cM/Mb	0.0797361	0.43076	0.0178521	0.90242	0.168873	0.426	0.123377	0.60285		0	0	0	0	0	m(CASTxB6)-cM/Mb	C
	female-cM/Mb	0.0514231	0.60771	-0.0827511	0.56523	-0.0334531	0.88203	-0.0148641	0.94923		0	0	0	0	0	female-cM/Mb	C
	male-cM/Mb	0.145531	0.15039	0.140136	0.33945	0.294396	0.15967	0.234469	0.32659		0	0	0	0	0	male-cM/Mb	C
	ave-cM/Mb	0.0988531	0.32584	0.0220381	0.88074	0.129892	0.54354	0.103947	0.66179		0	0	0	0	0	ave-cM/Mb	C
33-43	f(B6xCAST)-cM	0.174808	0.0768201	0.129719	0.37867	0.217943	0.29193	0.410956	0.0640601		0	0	0	0	0	f(B6xCAST)-cM	D
	f(CASTxB6)-cM	0.114054	0.25152	0.134033	0.36055	0.184679	0.38116	0.351934	0.12535		0	0	0	0	0	f(CASTxB6)-cM	D
	m(B6xCAST)-cM	0.32948	0.0025301	0.440639	0.0026101	0.542656	0.0081401	0.676903	0.0018301		111111	111111	111111	111111	444444	m(B6xCAST)-cM	D
	m(CASTxB6)-cM	0.190902	0.0553601	0.192648	0.17681	0.261847	0.20747	0.369494	0.10678		0	0	0	0	0	m(CASTxB6)-cM	D
	female-cM	0.149724	0.12554	0.135299	0.35656	0.207001	0.3222	0.389262	0.0838901		0	0	0	0	0	female-cM	D
	male-cM	0.273856	0.0095501	0.328728	0.0210201	0.424726	0.0347801	0.540834	0.0145601		111111	111111	111111	111111	444444	male-cM	D
	ave-cM	0.211101	0.0359401	0.230313	0.0988301	0.321167	0.11366	0.48029	0.0299801		111111	0	0	111111	222222	ave-cM	D
33-43	f(B6xCAST)-cM/Mb	0.174808	0.0779101	0.129719	0.37651	0.217943	0.2917	0.410956	0.0638401		0	0	0	0	0	f(B6xCAST)-cM/Mb	D
	f(CASTxB6)-cM/Mb	0.114054	0.25476	0.134034	0.35792	0.184679	0.3764	0.351934	0.12753		0	0	0	0	0	f(CASTxB6)-cM/Mb	D
	m(B6xCAST)-cM/Mb	0.32948	0.0024101	0.440639	0.0028601	0.542656	0.0088001	0.676903	0.0021101		111111	111111	111111	111111	444444	m(B6xCAST)-cM/Mb	D
	m(CASTxB6)-cM/Mb	0.190902	0.0533501	0.192648	0.17777	0.261847	0.20923	0.369494	0.10707		0	0	0	0	0	m(CASTxB6)-cM/Mb	D
	female-cM/Mb	0.149724	0.12686	0.135299	0.35444	0.207001	0.32046	0.389263	0.0849401		0	0	0	0	0	female-cM/Mb	D
	male-cM/Mb	0.273856	0.0097501	0.328728	0.0222101	0.424727	0.0348101	0.540834	0.0141201		111111	111111	111111	111111	444444	male-cM/Mb	D
	ave-cM/Mb	0.211101	0.0362901	0.230313	0.0998401	0.321167	0.11469	0.48029	0.0301601		111111	0	0	111111	222222	ave-cM/Mb	D
43-53	f(B6xCAST)-cM	0.16882	0.0902901	0.255828	0.0721801	0.31465	0.1243	0.48483	0.0270101		0	0	0	111111	111111	f(B6xCAST)-cM	E
	f(CASTxB6)-cM	0.165736	0.0983301	0.270654	0.0565901	0.344507	0.0928301	0.215461	0.35777		0	0	0	0	0	f(CASTxB6)-cM	E
	m(B6xCAST)-cM	-0.0014551	0.98974	0.0664111	0.65377	0.193201	0.36074	0.239523	0.31507		0	0	0	0	0	m(B6xCAST)-cM	E
	m(CASTxB6)-cM	0.0116351	0.91213	0.122522	0.40466	0.23382	0.27166	0.217991	0.3592		0	0	0	0	0	m(CASTxB6)-cM	E
	female-cM	0.183795	0.0652601	0.290487	0.0396101	0.361015	0.0750401	0.3781	0.0984401		0	111111	0	0	111111	female-cM	E
	male-cM	0.0054481	0.95909	0.0965961	0.513	0.215746	0.30876	0.229719	0.33264		0	0	0	0	0	male-cM	E
	ave-cM	0.0699511	0.49773	0.172519	0.23789	0.289238	0.16565	0.295234	0.20994		0	0	0	0	0	ave-cM	E
43-53	f(B6xCAST)-cM/Mb	0.16882	0.0909201	0.255828	0.0724701	0.31465	0.12427	0.48483	0.0278501		0	0	0	111111	111111	f(B6xCAST)-cM/Mb	E
	f(CASTxB6)-cM/Mb	0.165735	0.0958101	0.270654	0.0579701	0.344506	0.0934201	0.215461	0.35835		0	0	0	0	0	f(CASTxB6)-cM/Mb	E
	m(B6xCAST)-cM/Mb	-0.0014551	0.98916	0.0664111	0.65678	0.193201	0.36254	0.239523	0.31462		0	0	0	0	0	m(B6xCAST)-cM/Mb	E
	m(CASTxB6)-cM/Mb	0.0116351	0.91092	0.122522	0.40579	0.23382	0.26864	0.217991	0.36081		0	0	0	0	0	m(CASTxB6)-cM/Mb	E
	female-cM/Mb	0.183795	0.0642601	0.290487	0.0401501	0.361015	0.0769701	0.3781	0.10065		0	111111	0	0	111111	female-cM/Mb	E
	male-cM/Mb	0.0054481	0.96002	0.0965961	0.51286	0.215746	0.3068	0.229719	0.33205		0	0	0	0	0	male-cM/Mb	E
	ave-cM/Mb	0.0699511	0.49571	0.172519	0.23495	0.289238	0.16713	0.295234	0.20898		0	0	0	0	0	ave-cM/Mb	E
53-63	f(B6xCAST)-cM	-0.0616291	0.53819	-0.0730011	0.60299	-0.0889311	0.67314	-0.0272371	0.90945		0	0	0	0	0	f(B6xCAST)-cM	F
	f(CASTxB6)-cM	-0.155789	0.10531	-0.233215	0.0936601	-0.239271	0.24453	-0.266102	0.25111		0	0	0	0	0	f(CASTxB6)-cM	F
	m(B6xCAST)-cM	0.130388	0.1817	0.296853	0.0455801	0.46946	0.0220101	0.526413	0.0252501		0	111111	111111	111111	333333	m(B6xCAST)-cM	F
	m(CASTxB6)-cM	0.0862281	0.3883	0.20728	0.14769	0.39894	0.0471601	0.533317	0.0180201		0	0	111111	111111	222222	m(CASTxB6)-cM	F
	female-cM	-0.127112	0.19051	-0.174095	0.20548	-0.183074	0.37685	-0.168304	0.48375		0	0	0	0	0	female-cM	F
	male-cM	0.10671	0.2806	0.249322	0.0834901	0.441446	0.0293501	0.542427	0.0192601		0	0	111111	111111	222222	male-cM	F
	ave-cM	0.0454621	0.65154	0.145523	0.30616	0.31147	0.13115	0.408803	0.0724301		0	0	0	0	0	ave-cM	F
53-63	f(B6xCAST)-cM/Mb	-0.0616301	0.53734	-0.0730021	0.60325	-0.0889311	0.67216	-0.0272381	0.90906		0	0	0	0	0	f(B6xCAST)-cM/Mb	F
	f(CASTxB6)-cM/Mb	-0.155788	0.10377	-0.233216	0.0920601	-0.239271	0.24568	-0.266102	0.25013		0	0	0	0	0	f(CASTxB6)-cM/Mb	F
	m(B6xCAST)-cM/Mb	0.130388	0.18232	0.296853	0.0463401	0.46946	0.0220001	0.526413	0.0267801		0	111111	111111	111111	333333	m(B6xCAST)-cM/Mb	F
	m(CASTxB6)-cM/Mb	0.0862281	0.38753	0.20728	0.14718	0.39894	0.0480501	0.533317	0.0182901		0	0	111111	111111	222222	m(CASTxB6)-cM/Mb	F
	female-cM/Mb	-0.127113	0.18804	-0.174095	0.20407	-0.183074	0.37925	-0.168304	0.47884		0	0	0	0	0	female-cM/Mb	F
	male-cM/Mb	0.10671	0.27993	0.249322	0.0847701	0.441446	0.0297901	0.542427	0.0180901		0	0	111111	111111	222222	male-cM/Mb	F
	ave-cM/Mb	0.0454621	0.65176	0.145524	0.30754	0.31147	0.13135	0.408804	0.0727501		0	0	0	0	0	ave-cM/Mb	F
63-73	f(B6xCAST)-cM	0.125057	0.21717	0.0636171	0.65991	0.135309	0.52413	0.165073	0.49446		0	0	0	0	0	f(B6xCAST)-cM	G
	f(CASTxB6)-cM	0.0260721	0.79796	-0.0258071	0.85678	0.0046651	0.98291	0.0646421	0.78748		0	0	0	0	0	f(CASTxB6)-cM	G
	m(B6xCAST)-cM	0.0713581	0.48555	-0.0022201	0.9871	-0.0510841	0.81209	-0.0085411	0.97193		0	0	0	0	0	m(B6xCAST)-cM	G
	m(CASTxB6)-cM	-0.0257761	0.80263	-0.117476	0.41362	-0.178879	0.39432	-0.146645	0.53984		0	0	0	0	0	m(CASTxB6)-cM	G
	female-cM	0.0824771	0.4163	0.0216791	0.88207	0.0774621	0.72007	0.126811	0.59553		0	0	0	0	0	female-cM	G
	male-cM	0.0276071	0.78862	-0.0582011	0.6845	-0.117239	0.58219	-0.0756001	0.75082		0	0	0	0	0	male-cM	G
	ave-cM	0.0652711	0.5232	-0.0111791	0.93855	-0.0012451	0.99526	0.0532111	0.82512		0	0	0	0	0	ave-cM	G
63-73	f(B6xCAST)-cM/Mb	0.125057	0.21722	0.0636171	0.65901	0.13531	0.52456	0.165073	0.49055		0	0	0	0	0	f(B6xCAST)-cM/Mb	G
	f(CASTxB6)-cM/Mb	0.0260721	0.79934	-0.0258061	0.85876	0.0046651	0.9827	0.0646421	0.78668		0	0	0	0	0	f(CASTxB6)-cM/Mb	G
	m(B6xCAST)-cM/Mb	0.0713571	0.48369	-0.0022201	0.98766	-0.0510841	0.81118	-0.0085401	0.97187		0	0	0	0	0	m(B6xCAST)-cM/Mb	G
	m(CASTxB6)-cM/Mb	-0.0257751	0.79764	-0.117477	0.41583	-0.178879	0.39384	-0.146646	0.53823		0	0	0	0	0	m(CASTxB6)-cM/Mb	G
	female-cM/Mb	0.0824761	0.41809	0.0216791	0.88009	0.0774631	0.71923	0.126811	0.59459		0	0	0	0	0	female-cM/Mb	G
	male-cM/Mb	0.0276071	0.78921	-0.0582011	0.68676	-0.117239	0.58315	-0.0756001	0.75126		0	0	0	0	0	male-cM/Mb	G
	ave-cM/Mb	0.0652721	0.51938	-0.0111781	0.93617	-0.0012451	0.99538	0.0532111	0.82535		0	0	0	0	0	ave-cM/Mb	G
73-83	f(B6xCAST)-cM	0.237738	0.0157001	0.353596	0.0124101	0.359958	0.0740201	0.430178	0.0569101		111111	111111	0	0	222222	f(B6xCAST)-cM	H
	f(CASTxB6)-cM	0.182672	0.0686601	0.234565	0.10266	0.345786	0.0895401	0.386099	0.0945701		0	0	0	0	0	f(CASTxB6)-cM	H
	m(B6xCAST)-cM	-0.0704131	0.48946	-0.0918961	0.52223	-0.253809	0.22036	-0.0412371	0.85893		0	0	0	0	0	m(B6xCAST)-cM	H
	m(CASTxB6)-cM	-0.0507111	0.62384	-0.0303721	0.83544	-0.130691	0.52912	0.0504011	0.83586		0	0	0	0	0	m(CASTxB6)-cM	H
	female-cM	0.236144	0.0171901	0.330918	0.0183801	0.364151	0.0707401	0.444955	0.0484901		111111	111111	0	111111	333333	female-cM	H
	male-cM	-0.0627881	0.54372	-0.0644241	0.66005	-0.20167	0.33239	0.0059001	0.97942		0	0	0	0	0	male-cM	H
	ave-cM	0.129445	0.19792	0.197677	0.16378	0.147351	0.47797	0.302905	0.19177		0	0	0	0	0	ave-cM	H
73-83	f(B6xCAST)-cM/Mb	0.237737	0.0148601	0.353596	0.0121801	0.359958	0.0745001	0.430177	0.0573901		111111	111111	0	0	222222	f(B6xCAST)-cM/Mb	H
	f(CASTxB6)-cM/Mb	0.182672	0.0685101	0.234564	0.10163	0.345786	0.0870301	0.386099	0.0942201		0	0	0	0	0	f(CASTxB6)-cM/Mb	H
	m(B6xCAST)-cM/Mb	-0.0704131	0.49524	-0.0918961	0.52611	-0.253809	0.22185	-0.0412371	0.85869		0	0	0	0	0	m(B6xCAST)-cM/Mb	H
	m(CASTxB6)-cM/Mb	-0.0507111	0.62237	-0.0303721	0.83363	-0.130691	0.53177	0.0504011	0.83263		0	0	0	0	0	m(CASTxB6)-cM/Mb	H
	female-cM/Mb	0.236144	0.0161801	0.330918	0.0189001	0.364151	0.0710901	0.444955	0.0485001		111111	111111	0	111111	333333	female-cM/Mb	H
	male-cM/Mb	-0.0627881	0.54366	-0.0644251	0.6595	-0.20167	0.33242	0.0059001	0.97933		0	0	0	0	0	male-cM/Mb	H
	ave-cM/Mb	0.129444	0.19626	0.197677	0.16631	0.147351	0.47692	0.302906	0.19023		0	0	0	0	0	ave-cM/Mb	H
83-93	f(B6xCAST)-cM	0.215449	0.0265201	0.274598	0.0516901	0.444746	0.0249401	0.527598	0.0139801		111111	0	111111	111111	333333	f(B6xCAST)-cM	I
	f(CASTxB6)-cM	0.261268	0.0065401	0.312532	0.0248201	0.484339	0.0127301	0.558178	0.0032301		111111	111111	111111	111111	444444	f(CASTxB6)-cM	I
	m(B6xCAST)-cM	0.307724	0.0013501	0.292873	0.0351901	0.440177	0.0242701	0.629027	0.0011301		111111	111111	111111	111111	444444	m(B6xCAST)-cM	I
	m(CASTxB6)-cM	0.320931	0.0003101	0.350476	0.0082301	0.52362	0.0024701	0.630503	0.0001901		111111	111111	111111	111111	444444	m(CASTxB6)-cM	I
	female-cM	0.246425	0.0104801	0.305364	0.0278401	0.487059	0.0123801	0.563198	0.0045101		111111	111111	111111	111111	444444	female-cM	I
	male-cM	0.327938	0.0003301	0.34468	0.0108001	0.515359	0.0044901	0.659145	0.0001201		111111	111111	111111	111111	444444	male-cM	I
	ave-cM	0.295581	0.0015601	0.339793	0.0128101	0.529021	0.0043201	0.631113	0.0004101		111111	111111	111111	111111	444444	ave-cM	I
83-93	f(B6xCAST)-cM/Mb	0.215449	0.0283701	0.274598	0.0526401	0.444746	0.0238001	0.527598	0.0137901		111111	0	111111	111111	333333	f(B6xCAST)-cM/Mb	I
	f(CASTxB6)-cM/Mb	0.261268	0.0064501	0.312532	0.0243601	0.484339	0.0117101	0.558178	0.0031301		111111	111111	111111	111111	444444	f(CASTxB6)-cM/Mb	I
	m(B6xCAST)-cM/Mb	0.307724	0.0014701	0.292873	0.0348701	0.440177	0.0243001	0.629027	0.0011501		111111	111111	111111	111111	444444	m(B6xCAST)-cM/Mb	I
	m(CASTxB6)-cM/Mb	0.320931	0.0001801	0.350476	0.0085901	0.52362	0.0027001	0.630503	0.0001901		111111	111111	111111	111111	444444	m(CASTxB6)-cM/Mb	I
	female-cM/Mb	0.246425	0.0105301	0.305364	0.0283701	0.487058	0.0117101	0.563198	0.0044201		111111	111111	111111	111111	444444	female-cM/Mb	I
	male-cM/Mb	0.327937	0.0002601	0.34468	0.0109201	0.515359	0.0047601	0.659145	0.0001501		111111	111111	111111	111111	444444	male-cM/Mb	I
	ave-cM/Mb	0.295581	0.0015601	0.339793	0.0131701	0.529022	0.0046401	0.631113	0.0005101		111111	111111	111111	111111	444444	ave-cM/Mb	I
93-103	f(B6xCAST)-cM	-0.0939971	0.35686	-0.0049791	0.97354	-0.0031911	0.98779	-0.197831	0.4094		0	0	0	0	0	f(B6xCAST)-cM	J
	f(CASTxB6)-cM	-0.0517521	0.60936	0.0670451	0.64473	0.150157	0.47685	0.0550241	0.82024		0	0	0	0	0	f(CASTxB6)-cM	J
	m(B6xCAST)-cM	-0.0671291	0.5043	-0.111295	0.4452	-0.128136	0.54143	-0.195553	0.40669		0	0	0	0	0	m(B6xCAST)-cM	J
	m(CASTxB6)-cM	-0.0276861	0.78632	0.0433581	0.76371	0.0842871	0.688	0.0815951	0.71632		0	0	0	0	0	m(CASTxB6)-cM	J
	female-cM	-0.0769021	0.4521	0.0335581	0.81707	0.0719031	0.73497	-0.0898181	0.70974		0	0	0	0	0	female-cM	J
	male-cM	-0.0484441	0.62936	-0.0282451	0.84558	-0.0114791	0.95615	-0.0355501	0.87827		0	0	0	0	0	male-cM	J
	ave-cM	-0.0694181	0.49164	0.0034851	0.9819	0.0362501	0.86367	-0.0752561	0.75243		0	0	0	0	0	ave-cM	J
93-103	f(B6xCAST)-cM/Mb	-0.0939971	0.35533	-0.0049791	0.97323	-0.0031911	0.98789	-0.197831	0.40889		0	0	0	0	0	f(B6xCAST)-cM/Mb	J
	f(CASTxB6)-cM/Mb	-0.0517511	0.6111	0.0670451	0.64338	0.150156	0.47637	0.0550241	0.82255		0	0	0	0	0	f(CASTxB6)-cM/Mb	J
	m(B6xCAST)-cM/Mb	-0.0671291	0.50441	-0.111295	0.44197	-0.128136	0.54461	-0.195553	0.40401		0	0	0	0	0	m(B6xCAST)-cM/Mb	J
	m(CASTxB6)-cM/Mb	-0.0276851	0.78142	0.0433581	0.76147	0.0842871	0.68438	0.0815951	0.71678		0	0	0	0	0	m(CASTxB6)-cM/Mb	J
	female-cM/Mb	-0.0769031	0.44788	0.0335581	0.81742	0.0719041	0.73637	-0.0898171	0.71011		0	0	0	0	0	female-cM/Mb	J
	male-cM/Mb	-0.0484441	0.63304	-0.0282451	0.84217	-0.0114791	0.95684	-0.0355501	0.87826		0	0	0	0	0	male-cM/Mb	J
	ave-cM/Mb	-0.0694181	0.49269	0.0034851	0.98095	0.0362501	0.86501	-0.0752561	0.75288		0	0	0	0	0	ave-cM/Mb	J
103-113	f(B6xCAST)-cM	0.0600631	0.55663	0.106815	0.44482	0.305262	0.13153	0.236469	0.32951		0	0	0	0	0	f(B6xCAST)-cM	K
	f(CASTxB6)-cM	-0.0079401	0.94082	0.0521871	0.71694	0.203329	0.35471	0.121965	0.62716		0	0	0	0	0	f(CASTxB6)-cM	K
	m(B6xCAST)-cM	0.140759	0.15411	0.252822	0.0705101	0.419909	0.0326601	0.400926	0.0722201		0	0	111111	0	111111	m(B6xCAST)-cM	K
	m(CASTxB6)-cM	0.0235381	0.81791	0.0693571	0.61818	0.228899	0.27166	0.2616	0.26557		0	0	0	0	0	m(CASTxB6)-cM	K
	female-cM	0.0247221	0.81289	0.0824211	0.56289	0.262831	0.208	0.177848	0.47679		0	0	0	0	0	female-cM	K
	male-cM	0.0810001	0.42152	0.163216	0.23349	0.334686	0.0947601	0.338212	0.13416		0	0	0	0	0	male-cM	K
	ave-cM	0.0605271	0.55467	0.138132	0.32686	0.325017	0.10857	0.278119	0.23451		0	0	0	0	0	ave-cM	K
103-113	f(B6xCAST)-cM/Mb	0.0600631	0.55865	0.106815	0.44609	0.305261	0.13148	0.236469	0.32909		0	0	0	0	0	f(B6xCAST)-cM/Mb	K
	f(CASTxB6)-cM/Mb	-0.0079401	0.94057	0.0521871	0.71827	0.203329	0.35345	0.121965	0.62663		0	0	0	0	0	f(CASTxB6)-cM/Mb	K
	m(B6xCAST)-cM/Mb	0.140759	0.15494	0.252822	0.0697501	0.419909	0.0322001	0.400926	0.0728501		0	0	111111	0	111111	m(B6xCAST)-cM/Mb	K
	m(CASTxB6)-cM/Mb	0.0235381	0.81549	0.0693571	0.61817	0.228899	0.26926	0.2616	0.26374		0	0	0	0	0	m(CASTxB6)-cM/Mb	K
	female-cM/Mb	0.0247221	0.81228	0.0824211	0.56765	0.262831	0.20982	0.177848	0.47725		0	0	0	0	0	female-cM/Mb	K
	male-cM/Mb	0.0810001	0.42106	0.163216	0.23324	0.334686	0.0954201	0.338212	0.13642		0	0	0	0	0	male-cM/Mb	K
	ave-cM/Mb	0.0605271	0.5536	0.138132	0.3287	0.325017	0.10855	0.278119	0.2332		0	0	0	0	0	ave-cM/Mb	K
113-121.7	f(B6xCAST)-cM	0.0996851	0.33167	0.322039	0.0390601	0.424632	0.0549501	0.430206	0.0769901		0	111111	0	0	111111	f(B6xCAST)-cM	L
	f(CASTxB6)-cM	0.13156	0.20867	0.339038	0.0319501	0.501362	0.0248601	0.50721	0.0365701		0	111111	111111	111111	333333	f(CASTxB6)-cM	L
	m(B6xCAST)-cM	0.0828091	0.43542	0.19277	0.21234	0.1782	0.42394	0.221358	0.36859		0	0	0	0	0	m(B6xCAST)-cM	L
	m(CASTxB6)-cM	0.0088961	0.93378	0.149322	0.34479	0.209696	0.36042	0.254004	0.32501		0	0	0	0	0	m(CASTxB6)-cM	L
	female-cM	0.12057	0.24498	0.341878	0.0305601	0.482141	0.0304101	0.500378	0.0382701		0	111111	111111	111111	333333	female-cM	L
	male-cM	0.0492901	0.64919	0.179141	0.25219	0.20275	0.36786	0.248309	0.32759		0	0	0	0	0	male-cM	L
	ave-cM	0.0775491	0.46925	0.24673	0.11287	0.308845	0.16762	0.340544	0.17483		0	0	0	0	0	ave-cM	L
113-121.7	f(B6xCAST)-cM/Mb	0.0996851	0.33058	0.322039	0.0407201	0.424632	0.0546901	0.430206	0.0768601		0	111111	0	0	111111	f(B6xCAST)-cM/Mb	L
	f(CASTxB6)-cM/Mb	0.13156	0.20812	0.339038	0.0323801	0.501362	0.0257401	0.50721	0.0365901		0	111111	111111	111111	333333	f(CASTxB6)-cM/Mb	L
	m(B6xCAST)-cM/Mb	0.0828091	0.43405	0.19277	0.21271	0.1782	0.42542	0.221358	0.37142		0	0	0	0	0	m(B6xCAST)-cM/Mb	L
	m(CASTxB6)-cM/Mb	0.0088961	0.93452	0.149322	0.34506	0.209696	0.36108	0.254005	0.32748		0	0	0	0	0	m(CASTxB6)-cM/Mb	L
	female-cM/Mb	0.12057	0.2438	0.341878	0.0302601	0.482141	0.0306201	0.500378	0.0382001		0	111111	111111	111111	333333	female-cM/Mb	L
	male-cM/Mb	0.0492901	0.64518	0.179141	0.25442	0.20275	0.36901	0.248309	0.3251		0	0	0	0	0	male-cM/Mb	L
	ave-cM/Mb	0.0775491	0.46598	0.24673	0.11328	0.308845	0.16644	0.340543	0.17318		0	0	0	0	0	ave-cM/Mb	L
3-11.7	f(B6xCAST)-cM	-0.0184861	0.8612	0.0595291	0.69883	-0.178887	0.42236	-0.0894531	0.72356		0	0	0	0	0	f(B6xCAST)-cM	o
	f(CASTxB6)-cM	-0.0400371	0.70351	0.0018701	0.99	-0.203872	0.36292	-0.181057	0.47371		0	0	0	0	0	f(CASTxB6)-cM	o
	m(B6xCAST)-cM	0.212017	0.0451001	0.293428	0.0508501	0.0636701	0.77663	-0.0267631	0.91679		111111	0	0	0	111111	m(B6xCAST)-cM	o
	m(CASTxB6)-cM	0.0884391	0.39722	0.283552	0.0593301	0.0775371	0.7314	0.100643	0.69136		0	0	0	0	0	m(CASTxB6)-cM	o
	female-cM	-0.0321801	0.76109	0.0272601	0.86068	-0.197941	0.37597	-0.145731	0.56367		0	0	0	0	0	female-cM	o
	male-cM	0.170982	0.10354	0.30495	0.0424101	0.0733131	0.74538	0.0366011	0.88526		0	111111	0	0	111111	male-cM	o
	ave-cM	0.0360821	0.73582	0.135501	0.3758	-0.121885	0.58596	-0.10065	0.69012		0	0	0	0	0	ave-cM	o
3-11.7	f(B6xCAST)-cM/Mb	-0.0184861	0.86435	0.0595301	0.70233	-0.178887	0.4203	-0.0894531	0.72856		0	0	0	0	0	f(B6xCAST)-cM/Mb	o
	f(CASTxB6)-cM/Mb	-0.0400371	0.70448	0.0018701	0.99006	-0.203872	0.36091	-0.181057	0.47941		0	0	0	0	0	f(CASTxB6)-cM/Mb	o
	m(B6xCAST)-cM/Mb	0.212017	0.0466101	0.293428	0.0518301	0.0636691	0.77948	-0.0267631	0.9144		111111	0	0	0	111111	m(B6xCAST)-cM/Mb	o
	m(CASTxB6)-cM/Mb	0.0884391	0.39655	0.283552	0.0594801	0.0775361	0.73129	0.100642	0.69362		0	0	0	0	0	m(CASTxB6)-cM/Mb	o
	female-cM/Mb	-0.0321801	0.76358	0.0272601	0.85796	-0.197941	0.37563	-0.145731	0.56457		0	0	0	0	0	female-cM/Mb	o
	male-cM/Mb	0.170983	0.10378	0.30495	0.0437601	0.0733131	0.74517	0.0366001	0.8857		0	111111	0	0	111111	male-cM/Mb	o
	ave-cM/Mb	0.0360821	0.73384	0.135501	0.37407	-0.121884	0.5844	-0.10065	0.69137		0	0	0	0	0	ave-cM/Mb	o
11.7-21.7	f(B6xCAST)-cM	0.136629	0.14975	0.382791	0.0056201	0.425894	0.0303301	0.318301	0.18291		0	111111	111111	0	222222	f(B6xCAST)-cM	p
	f(CASTxB6)-cM	0.0663061	0.51284	0.306784	0.0278601	0.331973	0.10559	0.226435	0.35292		0	111111	0	0	111111	f(CASTxB6)-cM	p
	m(B6xCAST)-cM	0.269001	0.0173001	0.304316	0.0300401	0.446878	0.0123401	0.340425	0.12332		111111	111111	111111	0	333333	m(B6xCAST)-cM	p
	m(CASTxB6)-cM	0.211349	0.0365301	0.309543	0.0246201	0.480784	0.0080601	0.343654	0.12547		111111	111111	111111	0	333333	m(CASTxB6)-cM	p
	female-cM	0.100973	0.30285	0.347001	0.0128601	0.380762	0.0584201	0.273937	0.26036		0	111111	0	0	111111	female-cM	p
	male-cM	0.248012	0.0219701	0.310178	0.0261701	0.46561	0.0097601	0.34424	0.11894		111111	111111	111111	0	333333	male-cM	p
	ave-cM	0.195334	0.0475001	0.382743	0.0054301	0.498401	0.0093701	0.376876	0.0997801		111111	111111	111111	0	333333	ave-cM	p
11.7-21.7	f(B6xCAST)-cM/Mb	0.136629	0.15341	0.382791	0.0054901	0.425894	0.0297401	0.318301	0.18153		0	111111	111111	0	222222	f(B6xCAST)-cM/Mb	p
	f(CASTxB6)-cM/Mb	0.0663061	0.50957	0.306784	0.0286001	0.331973	0.10634	0.226435	0.35079		0	111111	0	0	111111	f(CASTxB6)-cM/Mb	p
	m(B6xCAST)-cM/Mb	0.269001	0.0176001	0.304316	0.0311501	0.446878	0.0121801	0.340425	0.12474		111111	111111	111111	0	333333	m(B6xCAST)-cM/Mb	p
	m(CASTxB6)-cM/Mb	0.211349	0.0353801	0.309543	0.0266101	0.480784	0.0086701	0.343654	0.12386		111111	111111	111111	0	333333	m(CASTxB6)-cM/Mb	p
	female-cM/Mb	0.100973	0.30209	0.347001	0.0124901	0.380762	0.0578401	0.273937	0.25936		0	111111	0	0	111111	female-cM/Mb	p
	male-cM/Mb	0.248011	0.0215501	0.310178	0.0270501	0.46561	0.0094701	0.34424	0.11727		111111	111111	111111	0	333333	male-cM/Mb	p
	ave-cM/Mb	0.195334	0.0482501	0.382743	0.0055301	0.498401	0.0087401	0.376877	0.10087		111111	111111	111111	0	333333	ave-cM/Mb	p
21.7-31.7	f(B6xCAST)-cM	0.0290041	0.77754	-0.148238	0.29911	-0.13925	0.51207	-0.0995801	0.66328		0	0	0	0	0	f(B6xCAST)-cM	q
	f(CASTxB6)-cM	0.0255491	0.80528	-0.135548	0.34164	-0.159854	0.45651	-0.135374	0.55382		0	0	0	0	0	f(CASTxB6)-cM	q
	m(B6xCAST)-cM	0.122898	0.22237	0.126986	0.38119	0.201328	0.34203	0.115645	0.62122		0	0	0	0	0	m(B6xCAST)-cM	q
	m(CASTxB6)-cM	-0.0036801	0.97151	-0.135393	0.34735	-0.0897901	0.67515	-0.120442	0.59995		0	0	0	0	0	m(CASTxB6)-cM	q
	female-cM	0.0285831	0.78168	-0.148275	0.3004	-0.154129	0.47243	-0.122319	0.59232		0	0	0	0	0	female-cM	q
	male-cM	0.0692581	0.49669	0.0063081	0.96435	0.0838461	0.68961	0.0131721	0.95544		0	0	0	0	0	male-cM	q
	ave-cM	0.0496751	0.62707	-0.0919051	0.52007	-0.0610371	0.77619	-0.0782461	0.73045		0	0	0	0	0	ave-cM	q
21.7-31.7	f(B6xCAST)-cM/Mb	0.0290041	0.77727	-0.148239	0.29904	-0.13925	0.51144	-0.0995801	0.66614		0	0	0	0	0	f(B6xCAST)-cM/Mb	q
	f(CASTxB6)-cM/Mb	0.0255491	0.80619	-0.135548	0.33991	-0.159853	0.46099	-0.135373	0.55722		0	0	0	0	0	f(CASTxB6)-cM/Mb	q
	m(B6xCAST)-cM/Mb	0.122898	0.22296	0.126986	0.37925	0.201328	0.33998	0.115645	0.61678		0	0	0	0	0	m(B6xCAST)-cM/Mb	q
	m(CASTxB6)-cM/Mb	-0.0036801	0.97202	-0.135392	0.34681	-0.0897891	0.67527	-0.120442	0.59897		0	0	0	0	0	m(CASTxB6)-cM/Mb	q
	female-cM/Mb	0.0285831	0.77811	-0.148274	0.29771	-0.154128	0.47536	-0.122319	0.59051		0	0	0	0	0	female-cM/Mb	q
	male-cM/Mb	0.0692581	0.49434	0.0063081	0.96542	0.0838471	0.68903	0.0131721	0.95452		0	0	0	0	0	male-cM/Mb	q
	ave-cM/Mb	0.0496751	0.6243	-0.0919061	0.52199	-0.0610371	0.77496	-0.0782471	0.73473		0	0	0	0	0	ave-cM/Mb	q
31.7-41.7	f(B6xCAST)-cM	0.148064	0.13479	0.0938041	0.53645	0.174927	0.39966	0.382248	0.0901601		0	0	0	0	0	f(B6xCAST)-cM	r
	f(CASTxB6)-cM	0.0869071	0.39003	0.0937291	0.53076	0.14221	0.49554	0.322298	0.16541		0	0	0	0	0	f(CASTxB6)-cM	r
	m(B6xCAST)-cM	0.302736	0.0036601	0.417729	0.0023801	0.539666	0.0056701	0.66868	0.0012101		111111	111111	111111	111111	444444	m(B6xCAST)-cM	r
	m(CASTxB6)-cM	0.17174	0.0830001	0.172988	0.22799	0.254099	0.21817	0.359764	0.11836		0	0	0	0	0	m(CASTxB6)-cM	r
	female-cM	0.122037	0.22243	0.0963481	0.51815	0.163566	0.43344	0.36	0.11587		0	0	0	0	0	female-cM	r
	male-cM	0.25053	0.0131401	0.308603	0.0266601	0.420703	0.0356801	0.532239	0.0154801		111111	111111	111111	111111	444444	male-cM	r
	ave-cM	0.185717	0.0599601	0.201671	0.15756	0.300768	0.14015	0.464671	0.0388101		0	0	0	111111	111111	ave-cM	r
31.7-41.7	f(B6xCAST)-cM/Mb	0.148064	0.13267	0.0938041	0.53622	0.174927	0.40331	0.382248	0.0903201		0	0	0	0	0	f(B6xCAST)-cM/Mb	r
	f(CASTxB6)-cM/Mb	0.0869071	0.39427	0.0937291	0.52847	0.14221	0.49746	0.322298	0.16586		0	0	0	0	0	f(CASTxB6)-cM/Mb	r
	m(B6xCAST)-cM/Mb	0.302736	0.0034801	0.417729	0.0030901	0.539666	0.0060901	0.66868	0.0012501		111111	111111	111111	111111	444444	m(B6xCAST)-cM/Mb	r
	m(CASTxB6)-cM/Mb	0.17174	0.0827601	0.172988	0.23116	0.254098	0.22018	0.359764	0.11814		0	0	0	0	0	m(CASTxB6)-cM/Mb	r
	female-cM/Mb	0.122037	0.22064	0.0963481	0.51596	0.163567	0.43345	0.36	0.11594		0	0	0	0	0	female-cM/Mb	r
	male-cM/Mb	0.25053	0.0137001	0.308603	0.0278701	0.420703	0.0363101	0.532239	0.0157601		111111	111111	111111	111111	444444	male-cM/Mb	r
	ave-cM/Mb	0.185717	0.0594101	0.201671	0.15625	0.300769	0.14038	0.464671	0.0374301		0	0	0	111111	111111	ave-cM/Mb	r
41.7-51.7	f(B6xCAST)-cM	0.170221	0.0894001	0.270253	0.0583301	0.341731	0.0937201	0.515176	0.0182801		0	0	0	111111	111111	f(B6xCAST)-cM	s
	f(CASTxB6)-cM	0.180853	0.0693501	0.320014	0.0223001	0.429148	0.0331601	0.338528	0.14362		0	111111	111111	0	222222	f(CASTxB6)-cM	s
	m(B6xCAST)-cM	0.0060911	0.95402	0.0824001	0.57847	0.225071	0.28999	0.301014	0.20283		0	0	0	0	0	m(B6xCAST)-cM	s
	m(CASTxB6)-cM	0.0140971	0.89266	0.132026	0.36784	0.255872	0.22812	0.259975	0.27567		0	0	0	0	0	m(CASTxB6)-cM	s
	female-cM	0.192128	0.0528501	0.323293	0.0222701	0.418328	0.0383001	0.454298	0.0444701		0	111111	111111	111111	333333	female-cM	s
	male-cM	0.0103661	0.9214	0.109236	0.46127	0.242465	0.25075	0.281216	0.2329		0	0	0	0	0	male-cM	s
	ave-cM	0.0769131	0.45457	0.193551	0.18148	0.328372	0.11255	0.359353	0.12228		0	0	0	0	0	ave-cM	s
41.7-51.7	f(B6xCAST)-cM/Mb	0.170221	0.0902201	0.270253	0.0572701	0.341731	0.0945701	0.515176	0.0177601		0	0	0	111111	111111	f(B6xCAST)-cM/Mb	s
	f(CASTxB6)-cM/Mb	0.180853	0.0692001	0.320014	0.0228601	0.429148	0.0330401	0.338527	0.14287		0	111111	111111	0	222222	f(CASTxB6)-cM/Mb	s
	m(B6xCAST)-cM/Mb	0.0060911	0.95294	0.0824011	0.57889	0.225071	0.28695	0.301014	0.2026		0	0	0	0	0	m(B6xCAST)-cM/Mb	s
	m(CASTxB6)-cM/Mb	0.0140971	0.89257	0.132026	0.37297	0.255872	0.22958	0.259975	0.27346		0	0	0	0	0	m(CASTxB6)-cM/Mb	s
	female-cM/Mb	0.192128	0.0525701	0.323293	0.0217501	0.418328	0.0380601	0.454298	0.0451101		0	111111	111111	111111	333333	female-cM/Mb	s
	male-cM/Mb	0.0103661	0.92255	0.109236	0.45932	0.242465	0.25301	0.281216	0.23599		0	0	0	0	0	male-cM/Mb	s
	ave-cM/Mb	0.0769131	0.45499	0.193551	0.18245	0.328372	0.11336	0.359353	0.12371		0	0	0	0	0	ave-cM/Mb	s
51.7-61.7	f(B6xCAST)-cM	-0.102087	0.30939	-0.112044	0.4387	-0.0657801	0.75514	0.0015901	0.99462		0	0	0	0	0	f(B6xCAST)-cM	t
	f(CASTxB6)-cM	-0.140749	0.15228	-0.215462	0.13191	-0.123342	0.56635	-0.250719	0.28123		0	0	0	0	0	f(CASTxB6)-cM	t
	m(B6xCAST)-cM	-0.0461321	0.64604	0.0217371	0.87927	0.186822	0.37768	0.245124	0.28731		0	0	0	0	0	m(B6xCAST)-cM	t
	m(CASTxB6)-cM	-0.0387531	0.7047	0.0461161	0.75027	0.339063	0.0960601	0.368349	0.10307		0	0	0	0	0	m(CASTxB6)-cM	t
	female-cM	-0.134453	0.17518	-0.182804	0.20144	-0.105607	0.62013	-0.148573	0.5325		0	0	0	0	0	female-cM	t
	male-cM	-0.0429781	0.67263	0.0385661	0.78883	0.297859	0.14918	0.332885	0.1449		0	0	0	0	0	male-cM	t
	ave-cM	-0.0810201	0.41631	-0.0416181	0.77312	0.180448	0.39645	0.185869	0.42868		0	0	0	0	0	ave-cM	t
51.7-61.7	f(B6xCAST)-cM/Mb	-0.102087	0.31185	-0.112044	0.43647	-0.0657801	0.75691	0.0015901	0.99451		0	0	0	0	0	f(B6xCAST)-cM/Mb	t
	f(CASTxB6)-cM/Mb	-0.140749	0.1495	-0.215462	0.13171	-0.123343	0.56828	-0.250718	0.28178		0	0	0	0	0	f(CASTxB6)-cM/Mb	t
	m(B6xCAST)-cM/Mb	-0.0461321	0.6479	0.0217371	0.87867	0.186822	0.37897	0.245124	0.28882		0	0	0	0	0	m(B6xCAST)-cM/Mb	t
	m(CASTxB6)-cM/Mb	-0.0387531	0.70269	0.0461161	0.75187	0.339063	0.0974901	0.368349	0.10373		0	0	0	0	0	m(CASTxB6)-cM/Mb	t
	female-cM/Mb	-0.134454	0.17343	-0.182804	0.20008	-0.105607	0.62142	-0.148573	0.52768		0	0	0	0	0	female-cM/Mb	t
	male-cM/Mb	-0.0429781	0.67416	0.0385661	0.78931	0.297859	0.14947	0.332884	0.14512		0	0	0	0	0	male-cM/Mb	t
	ave-cM/Mb	-0.0810191	0.41954	-0.0416181	0.77173	0.180448	0.39492	0.185869	0.43428		0	0	0	0	0	ave-cM/Mb	t
61.7-71.7	f(B6xCAST)-cM	0.125024	0.21736	0.0723101	0.61686	0.124482	0.55899	0.143183	0.54821		0	0	0	0	0	f(B6xCAST)-cM	u
	f(CASTxB6)-cM	0.0424211	0.6748	0.0044361	0.9754	0.0034701	0.98652	0.0887321	0.71038		0	0	0	0	0	f(CASTxB6)-cM	u
	m(B6xCAST)-cM	0.135907	0.1763	0.171346	0.23324	0.143523	0.51613	0.110903	0.63809		0	0	0	0	0	m(B6xCAST)-cM	u
	m(CASTxB6)-cM	0.0930201	0.37646	0.119865	0.40383	0.0717211	0.75665	0.0700601	0.7471		0	0	0	0	0	m(CASTxB6)-cM	u
	female-cM	0.0905671	0.3725	0.0423211	0.76889	0.0698411	0.74454	0.124596	0.59978		0	0	0	0	0	female-cM	u
	male-cM	0.113604	0.26817	0.143982	0.31744	0.105208	0.64351	0.0895891	0.69242		0	0	0	0	0	male-cM	u
	ave-cM	0.127353	0.21023	0.132571	0.35534	0.114346	0.59031	0.130716	0.58016		0	0	0	0	0	ave-cM	u
61.7-71.7	f(B6xCAST)-cM/Mb	0.125023	0.2194	0.0723091	0.61627	0.124482	0.56039	0.143183	0.54635		0	0	0	0	0	f(B6xCAST)-cM/Mb	u
	f(CASTxB6)-cM/Mb	0.0424201	0.67678	0.0044361	0.97514	0.0034701	0.98694	0.0887321	0.70998		0	0	0	0	0	f(CASTxB6)-cM/Mb	u
	m(B6xCAST)-cM/Mb	0.135907	0.17299	0.171346	0.23105	0.143524	0.51702	0.110903	0.63545		0	0	0	0	0	m(B6xCAST)-cM/Mb	u
	m(CASTxB6)-cM/Mb	0.0930201	0.37856	0.119865	0.40299	0.0717211	0.75462	0.0700601	0.7446		0	0	0	0	0	m(CASTxB6)-cM/Mb	u
	female-cM/Mb	0.0905661	0.37146	0.0423211	0.77135	0.0698411	0.74786	0.124596	0.59897		0	0	0	0	0	female-cM/Mb	u
	male-cM/Mb	0.113604	0.26802	0.143982	0.31582	0.105208	0.64266	0.0895891	0.69329		0	0	0	0	0	male-cM/Mb	u
	ave-cM/Mb	0.127353	0.21035	0.132571	0.3584	0.114346	0.59047	0.130716	0.58023		0	0	0	0	0	ave-cM/Mb	u
71.7-81.7	f(B6xCAST)-cM	0.251115	0.0115501	0.372082	0.0094301	0.361289	0.0745601	0.506238	0.0251501		111111	111111	0	111111	333333	f(B6xCAST)-cM	v
	f(CASTxB6)-cM	0.195166	0.0497401	0.264134	0.0635401	0.405143	0.0438701	0.461014	0.0430501		111111	0	111111	111111	333333	f(CASTxB6)-cM	v
	m(B6xCAST)-cM	-0.0638611	0.53009	-0.0732081	0.61523	-0.28383	0.1705	-0.0334041	0.88113		0	0	0	0	0	m(B6xCAST)-cM	v
	m(CASTxB6)-cM	-0.0310721	0.76182	-0.0276981	0.84869	-0.128189	0.53336	0.0909631	0.6876		0	0	0	0	0	m(CASTxB6)-cM	v
	female-cM	0.253712	0.0109201	0.361513	0.0108101	0.39944	0.0471301	0.539754	0.0145301		111111	111111	111111	111111	444444	female-cM	v
	male-cM	-0.0505581	0.62284	-0.0552391	0.70459	-0.221425	0.28372	0.0289501	0.8989		0	0	0	0	0	male-cM	v
	ave-cM	0.145721	0.14345	0.218116	0.12683	0.15738	0.44738	0.380883	0.0991701		0	0	0	0	0	ave-cM	v
71.7-81.7	f(B6xCAST)-cM/Mb	0.251114	0.0114801	0.372082	0.0095501	0.361289	0.0743701	0.506237	0.0241601		111111	111111	0	111111	333333	f(B6xCAST)-cM/Mb	v
	f(CASTxB6)-cM/Mb	0.195166	0.0501501	0.264134	0.0651301	0.405143	0.0434201	0.461013	0.0429601		0	0	111111	111111	222222	f(CASTxB6)-cM/Mb	v
	m(B6xCAST)-cM/Mb	-0.0638621	0.53248	-0.0732091	0.61753	-0.28383	0.17068	-0.0334041	0.88432		0	0	0	0	0	m(B6xCAST)-cM/Mb	v
	m(CASTxB6)-cM/Mb	-0.0310721	0.76078	-0.0276981	0.84966	-0.128189	0.53383	0.0909631	0.68948		0	0	0	0	0	m(CASTxB6)-cM/Mb	v
	female-cM/Mb	0.253713	0.0106201	0.361513	0.0105101	0.399439	0.0470301	0.539754	0.0149601		111111	111111	111111	111111	444444	female-cM/Mb	v
	male-cM/Mb	-0.0505581	0.62015	-0.0552401	0.70488	-0.221424	0.28429	0.0289501	0.89642		0	0	0	0	0	male-cM/Mb	v
	ave-cM/Mb	0.145721	0.1427	0.218116	0.12638	0.157381	0.44954	0.380884	0.0977901		0	0	0	0	0	ave-cM/Mb	v
81.7-91.7	f(B6xCAST)-cM	0.19744	0.0440901	0.207091	0.1493	0.365117	0.0711601	0.456264	0.0396201		111111	0	0	111111	222222	f(B6xCAST)-cM	w
	f(CASTxB6)-cM	0.247889	0.0090301	0.243194	0.0853001	0.410581	0.0388401	0.525524	0.0050701		111111	0	111111	111111	333333	f(CASTxB6)-cM	w
	m(B6xCAST)-cM	0.264476	0.0058601	0.221456	0.12438	0.330066	0.10934	0.557705	0.0067601		111111	0	0	111111	222222	m(B6xCAST)-cM	w
	m(CASTxB6)-cM	0.290981	0.0006001	0.296652	0.0294201	0.435204	0.0208201	0.581523	0.0007001		111111	111111	111111	111111	444444	m(CASTxB6)-cM	w
	female-cM	0.230335	0.0152201	0.234202	0.10033	0.407123	0.0405201	0.511298	0.0125201		111111	0	111111	111111	333333	female-cM	w
	male-cM	0.292542	0.0012401	0.282117	0.0427901	0.41584	0.0324501	0.600306	0.0007201		111111	111111	111111	111111	444444	male-cM	w
	ave-cM	0.269055	0.0035801	0.266947	0.0574901	0.433149	0.0280201	0.57056	0.0025001		111111	0	111111	111111	333333	ave-cM	w
81.7-91.7	f(B6xCAST)-cM/Mb	0.19744	0.0442801	0.207091	0.14929	0.365117	0.0705001	0.456264	0.0408701		111111	0	0	111111	222222	f(B6xCAST)-cM/Mb	w
	f(CASTxB6)-cM/Mb	0.247889	0.0088101	0.243194	0.0876901	0.410581	0.0384101	0.525524	0.0051201		111111	0	111111	111111	333333	f(CASTxB6)-cM/Mb	w
	m(B6xCAST)-cM/Mb	0.264476	0.0062501	0.221456	0.12391	0.330065	0.10659	0.557705	0.0068501		111111	0	0	111111	222222	m(B6xCAST)-cM/Mb	w
	m(CASTxB6)-cM/Mb	0.290981	0.0007001	0.296652	0.0285201	0.435204	0.0208201	0.581523	0.0007201		111111	111111	111111	111111	444444	m(CASTxB6)-cM/Mb	w
	female-cM/Mb	0.230335	0.0155901	0.234202	0.10088	0.407123	0.0416301	0.511298	0.0128001		111111	0	111111	111111	333333	female-cM/Mb	w
	male-cM/Mb	0.292542	0.0008701	0.282117	0.0434401	0.415839	0.0325201	0.600306	0.0008701		111111	111111	111111	111111	444444	male-cM/Mb	w
	ave-cM/Mb	0.269055	0.0034401	0.266947	0.0579701	0.433149	0.0269601	0.57056	0.0024801		111111	0	111111	111111	333333	ave-cM/Mb	w
91.7-101.7	f(B6xCAST)-cM	-0.0680471	0.50235	0.0780531	0.5888	0.0881281	0.67456	-0.0747671	0.75798		0	0	0	0	0	f(B6xCAST)-cM	x
	f(CASTxB6)-cM	-0.0364061	0.72019	0.130715	0.36464	0.23081	0.26867	0.153242	0.52301		0	0	0	0	0	f(CASTxB6)-cM	x
	m(B6xCAST)-cM	-0.0621711	0.53421	-0.0812751	0.57515	-0.0761321	0.7195	-0.121636	0.60522		0	0	0	0	0	m(B6xCAST)-cM	x
	m(CASTxB6)-cM	0.0033241	0.97344	0.0606181	0.67161	0.126736	0.54316	0.138445	0.53596		0	0	0	0	0	m(CASTxB6)-cM	x
	female-cM	-0.0545251	0.59093	0.111433	0.44154	0.163939	0.4354	0.0268251	0.91378		0	0	0	0	0	female-cM	x
	male-cM	-0.0283021	0.77536	-0.0037681	0.97915	0.0384611	0.85248	0.0321971	0.89006		0	0	0	0	0	male-cM	x
	ave-cM	-0.0464851	0.64407	0.0638371	0.65912	0.12038	0.56685	0.0355671	0.88243		0	0	0	0	0	ave-cM	x
91.7-101.7	f(B6xCAST)-cM/Mb	-0.0680471	0.50031	0.0780531	0.59317	0.0881281	0.67585	-0.0747671	0.7564		0	0	0	0	0	f(B6xCAST)-cM/Mb	x
	f(CASTxB6)-cM/Mb	-0.0364061	0.7199	0.130714	0.36663	0.23081	0.26926	0.153241	0.52509		0	0	0	0	0	f(CASTxB6)-cM/Mb	x
	m(B6xCAST)-cM/Mb	-0.0621711	0.53447	-0.0812751	0.5744	-0.0761321	0.71582	-0.121636	0.60447		0	0	0	0	0	m(B6xCAST)-cM/Mb	x
	m(CASTxB6)-cM/Mb	0.0033251	0.97263	0.0606181	0.67315	0.126737	0.5409	0.138445	0.53833		0	0	0	0	0	m(CASTxB6)-cM/Mb	x
	female-cM/Mb	-0.0545251	0.59059	0.111433	0.44003	0.163939	0.43672	0.0268251	0.91147		0	0	0	0	0	female-cM/Mb	x
	male-cM/Mb	-0.0283021	0.77774	-0.0037681	0.97968	0.0384611	0.85384	0.0321971	0.88963		0	0	0	0	0	male-cM/Mb	x
	ave-cM/Mb	-0.0464851	0.64399	0.0638371	0.66126	0.12038	0.56778	0.0355671	0.88029		0	0	0	0	0	ave-cM/Mb	x
101.7-111.7	f(B6xCAST)-cM	0.10915	0.24996	0.152735	0.23386	0.286367	0.15533	0.281969	0.21312		0	0	0	0	0	f(B6xCAST)-cM	y
	f(CASTxB6)-cM	0.183492	0.0617301	0.244051	0.0795501	0.41584	0.0353901	0.311525	0.1824		0	0	111111	0	111111	f(CASTxB6)-cM	y
	m(B6xCAST)-cM	0.129857	0.1747	0.211383	0.10592	0.373118	0.0572001	0.364465	0.0936801		0	0	0	0	0	m(B6xCAST)-cM	y
	m(CASTxB6)-cM	0.0649111	0.51003	0.0849311	0.5029	0.226288	0.24164	0.282939	0.19693		0	0	0	0	0	m(CASTxB6)-cM	y
	female-cM	0.146096	0.13025	0.196905	0.13422	0.350959	0.0829701	0.310068	0.17603		0	0	0	0	0	female-cM	y
	male-cM	0.0980261	0.30703	0.148297	0.24252	0.306665	0.13118	0.332586	0.13318		0	0	0	0	0	male-cM	y
	ave-cM	0.114417	0.2293	0.166236	0.19343	0.329302	0.10956	0.338418	0.12996		0	0	0	0	0	ave-cM	y
101.7-111.7	f(B6xCAST)-cM/Mb	0.10915	0.25214	0.152735	0.23361	0.286366	0.15538	0.281969	0.21018		0	0	0	0	0	f(B6xCAST)-cM/Mb	y
	f(CASTxB6)-cM/Mb	0.183492	0.0611601	0.244052	0.0797301	0.415841	0.0338001	0.311525	0.18215		0	0	111111	0	111111	f(CASTxB6)-cM/Mb	y
	m(B6xCAST)-cM/Mb	0.129857	0.17222	0.211383	0.10614	0.373117	0.0572201	0.364465	0.0940901		0	0	0	0	0	m(B6xCAST)-cM/Mb	y
	m(CASTxB6)-cM/Mb	0.0649111	0.51253	0.0849311	0.50013	0.226288	0.24203	0.282939	0.19751		0	0	0	0	0	m(CASTxB6)-cM/Mb	y
	female-cM/Mb	0.146096	0.13218	0.196905	0.13456	0.350959	0.0807501	0.310069	0.17432		0	0	0	0	0	female-cM/Mb	y
	male-cM/Mb	0.0980261	0.30803	0.148297	0.24328	0.306664	0.13379	0.332586	0.13287		0	0	0	0	0	male-cM/Mb	y
	ave-cM/Mb	0.114417	0.22844	0.166236	0.19538	0.329302	0.1105	0.338418	0.13037		0	0	0	0	0	ave-cM/Mb	y
111.7-121.7	f(B6xCAST)-cM	0.0842511	0.38754	0.257128	0.0725401	0.469527	0.0195001	0.367541	0.11676		0	0	111111	0	111111	f(B6xCAST)-cM	z
	f(CASTxB6)-cM	0.0365911	0.71534	0.221397	0.11977	0.424997	0.0348601	0.320219	0.15606		0	0	111111	0	111111	f(CASTxB6)-cM	z
	m(B6xCAST)-cM	0.126649	0.2067	0.280131	0.0509501	0.311242	0.13337	0.360079	0.12265		0	0	0	0	0	m(B6xCAST)-cM	z
	m(CASTxB6)-cM	-0.0197581	0.84456	0.151548	0.29962	0.266901	0.205	0.300842	0.20167		0	0	0	0	0	m(CASTxB6)-cM	z
	female-cM	0.0583551	0.55149	0.244405	0.0845701	0.458193	0.0231401	0.344817	0.13488		0	0	111111	0	111111	female-cM	z
	male-cM	0.0562461	0.57777	0.228766	0.11544	0.304678	0.14362	0.348983	0.13645		0	0	0	0	0	male-cM	z
	ave-cM	0.0621031	0.53552	0.260139	0.0712801	0.419914	0.0394301	0.377375	0.10404		0	0	111111	0	111111	ave-cM	z
111.7-121.7	f(B6xCAST)-cM/Mb	0.0842511	0.38747	0.257128	0.0725901	0.469527	0.0200001	0.367541	0.11524		0	0	111111	0	111111	f(B6xCAST)-cM/Mb	z
	f(CASTxB6)-cM/Mb	0.0365911	0.71136	0.221397	0.11723	0.424997	0.0344701	0.320219	0.15829		0	0	111111	0	111111	f(CASTxB6)-cM/Mb	z
	m(B6xCAST)-cM/Mb	0.126649	0.2096	0.280131	0.0514201	0.311243	0.13274	0.360079	0.12324		0	0	0	0	0	m(B6xCAST)-cM/Mb	z
	m(CASTxB6)-cM/Mb	-0.0197581	0.84404	0.151548	0.30242	0.266901	0.20405	0.300842	0.20049		0	0	0	0	0	m(CASTxB6)-cM/Mb	z
	female-cM/Mb	0.0583551	0.55227	0.244405	0.0858601	0.458193	0.0221801	0.344816	0.13631		0	0	111111	0	111111	female-cM/Mb	z
	male-cM/Mb	0.0562461	0.58269	0.228766	0.11531	0.304678	0.14442	0.348983	0.1364		0	0	0	0	0	male-cM/Mb	z
	ave-cM/Mb	0.0621031	0.53431	0.260139	0.0711901	0.419914	0.0393201	0.377374	0.10485		0	0	111111	0	111111	ave-cM/Mb	z

## Sheet: LINE
section (Mbp position)	cross	100.cor	100.sig	200.cor	200.sig	400.cor	400.sig	500.cor	500.sig	111111	100kb	200kb	400kb	500kb	SUM	cross	section
3-13	f(B6xCAST)-cM	-0.0313961	0.75336	0.0223511	0.87739	0.181482	0.38538	0.131268	0.57287		0	0	0	0	0	f(B6xCAST)-cM	A
	f(CASTxB6)-cM	-0.0101061	0.92147	0.0450431	0.75765	0.171076	0.42018	0.150778	0.51953		0	0	0	0	0	f(CASTxB6)-cM	A
	m(B6xCAST)-cM	-0.132326	0.18671	-0.160208	0.26765	-0.0658221	0.75674	-0.159234	0.50141		0	0	0	0	0	m(B6xCAST)-cM	A
	m(CASTxB6)-cM	-0.110511	0.27361	-0.112013	0.43872	-0.0262381	0.90133	-0.0771301	0.74252		0	0	0	0	0	m(CASTxB6)-cM	A
	female-cM	-0.0201331	0.84302	0.0356181	0.8047	0.179087	0.39357	0.146232	0.53316		0	0	0	0	0	female-cM	A
	male-cM	-0.135433	0.17674	-0.145479	0.31522	-0.0503301	0.8105	-0.133622	0.56889		0	0	0	0	0	male-cM	A
	ave-cM	-0.0617181	0.54312	-0.0319231	0.8255	0.110141	0.59886	0.0696511	0.7667		0	0	0	0	0	ave-cM	A
3-13	f(B6xCAST)-cM/Mb	-0.0313961	0.75707	0.0223521	0.87589	0.181482	0.38175	0.131269	0.57449		0	0	0	0	0	f(B6xCAST)-cM/Mb	A
	f(CASTxB6)-cM/Mb	-0.0101061	0.92147	0.0450431	0.75289	0.171076	0.42215	0.150778	0.52287		0	0	0	0	0	f(CASTxB6)-cM/Mb	A
	m(B6xCAST)-cM/Mb	-0.132326	0.18597	-0.160208	0.27039	-0.0658221	0.75861	-0.159234	0.50186		0	0	0	0	0	m(B6xCAST)-cM/Mb	A
	m(CASTxB6)-cM/Mb	-0.110511	0.27331	-0.112013	0.44081	-0.0262381	0.90035	-0.0771301	0.7407		0	0	0	0	0	m(CASTxB6)-cM/Mb	A
	female-cM/Mb	-0.0201331	0.84281	0.0356181	0.80526	0.179087	0.39377	0.146233	0.53368		0	0	0	0	0	female-cM/Mb	A
	male-cM/Mb	-0.135433	0.17477	-0.145479	0.3162	-0.0503301	0.81312	-0.133622	0.56978		0	0	0	0	0	male-cM/Mb	A
	ave-cM/Mb	-0.0617181	0.5408	-0.0319231	0.82292	0.11014	0.60081	0.0696521	0.76763		0	0	0	0	0	ave-cM/Mb	A
13-23	f(B6xCAST)-cM	-0.144344	0.15356	-0.0961071	0.58975	-0.10157	0.67319	-0.12651	0.6462		0	0	0	0	0	f(B6xCAST)-cM	B
	f(CASTxB6)-cM	-0.125862	0.22804	-0.0698481	0.68477	-0.0668171	0.76922	-0.0638121	0.8051		0	0	0	0	0	f(CASTxB6)-cM	B
	m(B6xCAST)-cM	-0.25199	0.0036001	-0.288255	0.0309501	-0.327078	0.0972201	-0.395302	0.0702401		111111	111111	0	0	222222	m(B6xCAST)-cM	B
	m(CASTxB6)-cM	-0.207475	0.0293301	-0.204002	0.16595	-0.250137	0.25201	-0.263873	0.29671		111111	0	0	0	111111	m(CASTxB6)-cM	B
	female-cM	-0.135842	0.18652	-0.0834741	0.63695	-0.0841671	0.71787	-0.0951311	0.72344		0	0	0	0	0	female-cM	B
	male-cM	-0.23715	0.0083801	-0.254696	0.0656701	-0.29899	0.14123	-0.342224	0.13965		111111	0	0	0	111111	male-cM	B
	ave-cM	-0.212956	0.0257201	-0.197241	0.18097	-0.236171	0.26685	-0.282515	0.24027		111111	0	0	0	111111	ave-cM	B
13-23	f(B6xCAST)-cM/Mb	-0.144344	0.15284	-0.0961071	0.59073	-0.10157	0.67142	-0.12651	0.64605		0	0	0	0	0	f(B6xCAST)-cM/Mb	B
	f(CASTxB6)-cM/Mb	-0.125862	0.2301	-0.0698481	0.68524	-0.0668161	0.76842	-0.0638121	0.80927		0	0	0	0	0	f(CASTxB6)-cM/Mb	B
	m(B6xCAST)-cM/Mb	-0.25199	0.0037701	-0.288255	0.0321801	-0.327078	0.0979501	-0.395302	0.0707201		111111	111111	0	0	222222	m(B6xCAST)-cM/Mb	B
	m(CASTxB6)-cM/Mb	-0.207475	0.0288801	-0.204002	0.16677	-0.250136	0.25193	-0.263873	0.30112		111111	0	0	0	111111	m(CASTxB6)-cM/Mb	B
	female-cM/Mb	-0.135842	0.18606	-0.0834741	0.63795	-0.0841671	0.72079	-0.0951311	0.72369		0	0	0	0	0	female-cM/Mb	B
	male-cM/Mb	-0.23715	0.0087901	-0.254696	0.0655101	-0.29899	0.1403	-0.342224	0.13966		111111	0	0	0	111111	male-cM/Mb	B
	ave-cM/Mb	-0.212956	0.0259901	-0.197241	0.18199	-0.23617	0.26972	-0.282515	0.23948		111111	0	0	0	111111	ave-cM/Mb	B
23-33	f(B6xCAST)-cM	-0.0798031	0.43605	-0.0391151	0.78852	-0.0372161	0.86263	-0.0783681	0.74713		0	0	0	0	0	f(B6xCAST)-cM	C
	f(CASTxB6)-cM	-0.116437	0.25638	-0.0462681	0.75078	-0.0334261	0.8773	-0.0797681	0.75309		0	0	0	0	0	f(CASTxB6)-cM	C
	m(B6xCAST)-cM	-0.317803	0.0006301	-0.393833	0.0033001	-0.541737	0.0037201	-0.703615	0.0002601		111111	111111	111111	111111	444444	m(B6xCAST)-cM	C
	m(CASTxB6)-cM	-0.222607	0.0230001	-0.229902	0.10867	-0.302287	0.14212	-0.350992	0.13302		111111	0	0	0	111111	m(CASTxB6)-cM	C
	female-cM	-0.103598	0.31224	-0.0449541	0.75808	-0.0361321	0.86803	-0.0813771	0.74511		0	0	0	0	0	female-cM	C
	male-cM	-0.289891	0.0027501	-0.333916	0.0161201	-0.451201	0.0228101	-0.556439	0.0087101		111111	111111	111111	111111	444444	male-cM	C
	ave-cM	-0.197619	0.0465001	-0.196002	0.17349	-0.2521	0.22366	-0.319161	0.17133		111111	0	0	0	111111	ave-cM	C
23-33	f(B6xCAST)-cM/Mb	-0.0798031	0.43527	-0.0391151	0.78937	-0.0372161	0.86265	-0.0783681	0.74824		0	0	0	0	0	f(B6xCAST)-cM/Mb	C
	f(CASTxB6)-cM/Mb	-0.116436	0.25456	-0.0462681	0.75217	-0.0334261	0.8768	-0.0797681	0.75214		0	0	0	0	0	f(CASTxB6)-cM/Mb	C
	m(B6xCAST)-cM/Mb	-0.317803	0.0006801	-0.393834	0.0034901	-0.541737	0.0040301	-0.703616	0.0001901		111111	111111	111111	111111	444444	m(B6xCAST)-cM/Mb	C
	m(CASTxB6)-cM/Mb	-0.222608	0.0231401	-0.229902	0.10833	-0.302287	0.14341	-0.350992	0.1312		111111	0	0	0	111111	m(CASTxB6)-cM/Mb	C
	female-cM/Mb	-0.103599	0.31237	-0.0449541	0.75827	-0.0361331	0.86682	-0.0813771	0.74561		0	0	0	0	0	female-cM/Mb	C
	male-cM/Mb	-0.289891	0.0023801	-0.333916	0.0166801	-0.451202	0.0228501	-0.556439	0.0089601		111111	111111	111111	111111	444444	male-cM/Mb	C
	ave-cM/Mb	-0.197619	0.0470601	-0.196002	0.1732	-0.2521	0.22627	-0.319161	0.17088		111111	0	0	0	111111	ave-cM/Mb	C
33-43	f(B6xCAST)-cM	-0.174177	0.0784101	-0.269499	0.0540901	-0.339344	0.0958201	-0.266846	0.25935		0	0	0	0	0	f(B6xCAST)-cM	D
	f(CASTxB6)-cM	-0.182241	0.0681001	-0.2981	0.0335401	-0.36579	0.0722301	-0.338306	0.1459		0	111111	0	0	111111	f(CASTxB6)-cM	D
	m(B6xCAST)-cM	-0.274007	0.0037501	-0.392451	0.0034001	-0.515807	0.0063601	-0.510007	0.0189201		111111	111111	111111	111111	444444	m(B6xCAST)-cM	D
	m(CASTxB6)-cM	-0.245226	0.0119901	-0.327595	0.0184401	-0.412501	0.0408801	-0.335187	0.14957		111111	111111	111111	0	333333	m(CASTxB6)-cM	D
	female-cM	-0.183582	0.0638901	-0.290807	0.0380401	-0.361504	0.0755801	-0.308551	0.18517		0	111111	0	0	111111	female-cM	D
	male-cM	-0.272589	0.0040801	-0.376571	0.0056201	-0.488813	0.0129901	-0.437526	0.0545201		111111	111111	111111	0	333333	male-cM	D
	ave-cM	-0.230218	0.0170801	-0.339944	0.0138201	-0.436181	0.0281001	-0.385224	0.0948601		111111	111111	111111	0	333333	ave-cM	D
33-43	f(B6xCAST)-cM/Mb	-0.174178	0.0779501	-0.269499	0.0552201	-0.339344	0.0958401	-0.266846	0.25699		0	0	0	0	0	f(B6xCAST)-cM/Mb	D
	f(CASTxB6)-cM/Mb	-0.182241	0.0672201	-0.2981	0.0330901	-0.36579	0.0729701	-0.338306	0.14741		0	111111	0	0	111111	f(CASTxB6)-cM/Mb	D
	m(B6xCAST)-cM/Mb	-0.274007	0.0036601	-0.392451	0.0034901	-0.515806	0.0068401	-0.510007	0.0195701		111111	111111	111111	111111	444444	m(B6xCAST)-cM/Mb	D
	m(CASTxB6)-cM/Mb	-0.245226	0.0123501	-0.327594	0.0189301	-0.412501	0.0404701	-0.335187	0.14878		111111	111111	111111	0	333333	m(CASTxB6)-cM/Mb	D
	female-cM/Mb	-0.183582	0.0635501	-0.290807	0.0379101	-0.361504	0.0765701	-0.308551	0.18789		0	111111	0	0	111111	female-cM/Mb	D
	male-cM/Mb	-0.272589	0.0042501	-0.376571	0.0056201	-0.488814	0.0125801	-0.437526	0.0551201		111111	111111	111111	0	333333	male-cM/Mb	D
	ave-cM/Mb	-0.230218	0.0172901	-0.339944	0.0145201	-0.436181	0.0285401	-0.385224	0.0952601		111111	111111	111111	0	333333	ave-cM/Mb	D
43-53	f(B6xCAST)-cM	-0.0875671	0.38011	-0.0721191	0.62225	-0.104746	0.62113	-0.0790341	0.75209		0	0	0	0	0	f(B6xCAST)-cM	E
	f(CASTxB6)-cM	-0.145207	0.14066	-0.14915	0.30409	-0.204324	0.33128	-0.0860311	0.72015		0	0	0	0	0	f(CASTxB6)-cM	E
	m(B6xCAST)-cM	-0.0767531	0.44355	-0.131551	0.36508	-0.215622	0.31142	-0.0693241	0.78043		0	0	0	0	0	m(B6xCAST)-cM	E
	m(CASTxB6)-cM	-0.0800121	0.4241	-0.137267	0.3479	-0.215416	0.31864	-0.0111981	0.96431		0	0	0	0	0	m(CASTxB6)-cM	E
	female-cM	-0.129492	0.19221	-0.123932	0.39175	-0.172816	0.40665	-0.0895171	0.71136		0	0	0	0	0	female-cM	E
	male-cM	-0.0790541	0.43031	-0.135445	0.35268	-0.216466	0.31061	-0.0391071	0.87645		0	0	0	0	0	male-cM	E
	ave-cM	-0.106333	0.28655	-0.144672	0.32232	-0.225585	0.28837	-0.0585901	0.81628		0	0	0	0	0	ave-cM	E
43-53	f(B6xCAST)-cM/Mb	-0.0875671	0.38053	-0.0721191	0.61727	-0.104746	0.61877	-0.0790341	0.75214		0	0	0	0	0	f(B6xCAST)-cM/Mb	E
	f(CASTxB6)-cM/Mb	-0.145207	0.14254	-0.14915	0.30456	-0.204324	0.33474	-0.0860321	0.71825		0	0	0	0	0	f(CASTxB6)-cM/Mb	E
	m(B6xCAST)-cM/Mb	-0.0767531	0.44016	-0.131551	0.36699	-0.215622	0.31321	-0.0693241	0.78111		0	0	0	0	0	m(B6xCAST)-cM/Mb	E
	m(CASTxB6)-cM/Mb	-0.0800121	0.4268	-0.137267	0.34908	-0.215416	0.31639	-0.0111981	0.96326		0	0	0	0	0	m(CASTxB6)-cM/Mb	E
	female-cM/Mb	-0.129492	0.19014	-0.123931	0.39319	-0.172815	0.40757	-0.0895161	0.71168		0	0	0	0	0	female-cM/Mb	E
	male-cM/Mb	-0.0790541	0.4299	-0.135445	0.3525	-0.216466	0.31247	-0.0391071	0.87639		0	0	0	0	0	male-cM/Mb	E
	ave-cM/Mb	-0.106333	0.28565	-0.144672	0.32296	-0.225584	0.29051	-0.0585901	0.81428		0	0	0	0	0	ave-cM/Mb	E
53-63	f(B6xCAST)-cM	0.270815	0.0096601	0.428225	0.0035901	0.387528	0.0552301	0.46898	0.0373301		111111	111111	0	111111	333333	f(B6xCAST)-cM	F
	f(CASTxB6)-cM	0.277928	0.0231301	0.340078	0.0277301	0.233526	0.26159	0.339925	0.14569		111111	111111	0	0	222222	f(CASTxB6)-cM	F
	m(B6xCAST)-cM	0.0906861	0.34104	0.0938541	0.52165	-0.0235671	0.91199	0.141724	0.53288		0	0	0	0	0	m(B6xCAST)-cM	F
	m(CASTxB6)-cM	-0.0331411	0.74354	-0.0623121	0.68091	-0.212042	0.30566	-0.0621811	0.78975		0	0	0	0	0	m(CASTxB6)-cM	F
	female-cM	0.292991	0.0139201	0.397213	0.0097301	0.324418	0.11415	0.431864	0.0611201		111111	111111	0	0	222222	female-cM	F
	male-cM	0.0182661	0.85719	-0.0005641	0.99696	-0.142984	0.49473	0.0234051	0.91974		0	0	0	0	0	male-cM	F
	ave-cM	0.105526	0.27887	0.125719	0.38696	-0.0112951	0.95694	0.179654	0.44123		0	0	0	0	0	ave-cM	F
53-63	f(B6xCAST)-cM/Mb	0.270815	0.0096801	0.428225	0.0037001	0.387529	0.0562801	0.46898	0.0374001		111111	111111	0	111111	333333	f(B6xCAST)-cM/Mb	F
	f(CASTxB6)-cM/Mb	0.277929	0.0222101	0.340078	0.0265501	0.233526	0.25997	0.339926	0.14587		111111	111111	0	0	222222	f(CASTxB6)-cM/Mb	F
	m(B6xCAST)-cM/Mb	0.0906861	0.33912	0.0938551	0.52164	-0.0235671	0.91348	0.141724	0.53336		0	0	0	0	0	m(B6xCAST)-cM/Mb	F
	m(CASTxB6)-cM/Mb	-0.0331411	0.7405	-0.0623121	0.67787	-0.212042	0.30284	-0.0621811	0.78999		0	0	0	0	0	m(CASTxB6)-cM/Mb	F
	female-cM/Mb	0.292991	0.0131001	0.397214	0.0103001	0.324418	0.11528	0.431864	0.0609801		111111	111111	0	0	222222	female-cM/Mb	F
	male-cM/Mb	0.0182661	0.85658	-0.0005641	0.99717	-0.142984	0.49263	0.0234051	0.92171		0	0	0	0	0	male-cM/Mb	F
	ave-cM/Mb	0.105527	0.27536	0.125719	0.38411	-0.0112951	0.95789	0.179654	0.44525		0	0	0	0	0	ave-cM/Mb	F
63-73	f(B6xCAST)-cM	-0.0783141	0.42271	-0.0737011	0.59778	-0.0635871	0.75074	-0.0395601	0.86342		0	0	0	0	0	f(B6xCAST)-cM	G
	f(CASTxB6)-cM	-0.0122941	0.89854	-0.0007831	0.99511	0.0236011	0.90669	-0.0151501	0.94831		0	0	0	0	0	f(CASTxB6)-cM	G
	m(B6xCAST)-cM	-0.0892791	0.34969	-0.0435821	0.74584	0.0028741	0.98913	0.0269231	0.90821		0	0	0	0	0	m(B6xCAST)-cM	G
	m(CASTxB6)-cM	-0.0372381	0.70277	0.0051791	0.96841	0.0365711	0.85586	-0.0232401	0.91935		0	0	0	0	0	m(CASTxB6)-cM	G
	female-cM	-0.0495001	0.61016	-0.0414751	0.76493	-0.0229661	0.90853	-0.0302161	0.89638		0	0	0	0	0	female-cM	G
	male-cM	-0.0688171	0.47144	-0.0229381	0.86621	0.0196801	0.9219	0.0045831	0.98463		0	0	0	0	0	male-cM	G
	ave-cM	-0.0618581	0.51962	-0.0362131	0.79036	-0.0061411	0.97516	-0.0182201	0.93692		0	0	0	0	0	ave-cM	G
63-73	f(B6xCAST)-cM/Mb	-0.0783141	0.42246	-0.0737011	0.59781	-0.0635881	0.75081	-0.0395601	0.8644		0	0	0	0	0	f(B6xCAST)-cM/Mb	G
	f(CASTxB6)-cM/Mb	-0.0122931	0.89954	-0.0007841	0.99543	0.0236011	0.90698	-0.0151501	0.94747		0	0	0	0	0	f(CASTxB6)-cM/Mb	G
	m(B6xCAST)-cM/Mb	-0.0892801	0.35132	-0.0435821	0.74496	0.0028741	0.98921	0.0269241	0.90729		0	0	0	0	0	m(B6xCAST)-cM/Mb	G
	m(CASTxB6)-cM/Mb	-0.0372381	0.70236	0.0051781	0.96939	0.0365711	0.85935	-0.0232401	0.92048		0	0	0	0	0	m(CASTxB6)-cM/Mb	G
	female-cM/Mb	-0.0495001	0.6082	-0.0414751	0.76492	-0.0229651	0.90999	-0.0302171	0.89604		0	0	0	0	0	female-cM/Mb	G
	male-cM/Mb	-0.0688171	0.47239	-0.0229381	0.866	0.0196811	0.92264	0.0045831	0.98397		0	0	0	0	0	male-cM/Mb	G
	ave-cM/Mb	-0.0618581	0.52314	-0.0362131	0.7894	-0.0061411	0.97536	-0.0182201	0.93879		0	0	0	0	0	ave-cM/Mb	G
73-83	f(B6xCAST)-cM	-0.104817	0.23246	-0.154133	0.21948	-0.190134	0.30087	-0.181976	0.46061		0	0	0	0	0	f(B6xCAST)-cM	H
	f(CASTxB6)-cM	-0.151569	0.12138	-0.194929	0.1584	-0.194089	0.32021	-0.195593	0.42838		0	0	0	0	0	f(CASTxB6)-cM	H
	m(B6xCAST)-cM	-0.145897	0.10571	-0.191089	0.14661	-0.180641	0.36579	-0.211729	0.32489		0	0	0	0	0	m(B6xCAST)-cM	H
	m(CASTxB6)-cM	-0.166487	0.0741701	-0.244656	0.0689701	-0.301258	0.0988501	-0.33232	0.1188		0	0	0	0	0	m(CASTxB6)-cM	H
	female-cM	-0.135144	0.1411	-0.188221	0.15682	-0.197752	0.28761	-0.203861	0.41821		0	0	0	0	0	female-cM	H
	male-cM	-0.161209	0.0794801	-0.224289	0.0870301	-0.244653	0.16763	-0.282884	0.16376		0	0	0	0	0	male-cM	H
	ave-cM	-0.172961	0.0658701	-0.241615	0.0701901	-0.254715	0.19436	-0.274637	0.22765		0	0	0	0	0	ave-cM	H
73-83	f(B6xCAST)-cM/Mb	-0.104816	0.23064	-0.154133	0.21905	-0.190134	0.30163	-0.181976	0.46335		0	0	0	0	0	f(B6xCAST)-cM/Mb	H
	f(CASTxB6)-cM/Mb	-0.151569	0.11975	-0.194928	0.16017	-0.19409	0.32204	-0.195594	0.42528		0	0	0	0	0	f(CASTxB6)-cM/Mb	H
	m(B6xCAST)-cM/Mb	-0.145897	0.1073	-0.191089	0.14385	-0.180641	0.36566	-0.211729	0.32649		0	0	0	0	0	m(B6xCAST)-cM/Mb	H
	m(CASTxB6)-cM/Mb	-0.166487	0.0768901	-0.244656	0.0699401	-0.301258	0.10124	-0.33232	0.12005		0	0	0	0	0	m(CASTxB6)-cM/Mb	H
	female-cM/Mb	-0.135144	0.14063	-0.188221	0.15685	-0.197751	0.28873	-0.203861	0.4196		0	0	0	0	0	female-cM/Mb	H
	male-cM/Mb	-0.161209	0.0785501	-0.224289	0.0876201	-0.244653	0.16846	-0.282885	0.16617		0	0	0	0	0	male-cM/Mb	H
	ave-cM/Mb	-0.172959	0.0638801	-0.241616	0.0701301	-0.254715	0.19444	-0.274637	0.22797		0	0	0	0	0	ave-cM/Mb	H
83-93	f(B6xCAST)-cM	-0.0676821	0.53252	-0.116843	0.43937	-0.101658	0.6414	-0.157729	0.52759		0	0	0	0	0	f(B6xCAST)-cM	I
	f(CASTxB6)-cM	-0.0369901	0.75065	-0.0890161	0.56995	-0.0233161	0.91922	-0.0574021	0.85354		0	0	0	0	0	f(CASTxB6)-cM	I
	m(B6xCAST)-cM	-0.101687	0.32655	-0.179532	0.20744	-0.230057	0.27483	-0.274084	0.2431		0	0	0	0	0	m(B6xCAST)-cM	I
	m(CASTxB6)-cM	-0.0261791	0.8233	-0.122944	0.41454	-0.0850991	0.70892	-0.134478	0.63195		0	0	0	0	0	m(CASTxB6)-cM	I
	female-cM	-0.0539521	0.63747	-0.107003	0.48628	-0.0651721	0.77354	-0.105805	0.71412		0	0	0	0	0	female-cM	I
	male-cM	-0.0525891	0.63567	-0.149543	0.31064	-0.141987	0.52437	-0.18796	0.45687		0	0	0	0	0	male-cM	I
	ave-cM	-0.0564211	0.62069	-0.131428	0.38531	-0.100655	0.65748	-0.145328	0.58681		0	0	0	0	0	ave-cM	I
83-93	f(B6xCAST)-cM/Mb	-0.0676821	0.53184	-0.116843	0.43811	-0.101658	0.64168	-0.157729	0.53121		0	0	0	0	0	f(B6xCAST)-cM/Mb	I
	f(CASTxB6)-cM/Mb	-0.0369901	0.75231	-0.0890161	0.56933	-0.0233161	0.91886	-0.0574021	0.85214		0	0	0	0	0	f(CASTxB6)-cM/Mb	I
	m(B6xCAST)-cM/Mb	-0.101687	0.32755	-0.179532	0.20838	-0.230058	0.27491	-0.274085	0.24175		0	0	0	0	0	m(B6xCAST)-cM/Mb	I
	m(CASTxB6)-cM/Mb	-0.0261791	0.82448	-0.122944	0.41507	-0.0850991	0.70859	-0.134478	0.63118		0	0	0	0	0	m(CASTxB6)-cM/Mb	I
	female-cM/Mb	-0.0539521	0.63597	-0.107004	0.48811	-0.0651721	0.77335	-0.105804	0.71428		0	0	0	0	0	female-cM/Mb	I
	male-cM/Mb	-0.0525891	0.63447	-0.149543	0.31196	-0.141987	0.52558	-0.18796	0.45762		0	0	0	0	0	male-cM/Mb	I
	ave-cM/Mb	-0.0564211	0.61864	-0.131428	0.38418	-0.100655	0.65655	-0.145327	0.58549		0	0	0	0	0	ave-cM/Mb	I
93-103	f(B6xCAST)-cM	-0.0072881	0.9428	0.13627	0.34354	0.186359	0.35961	0.268213	0.25937		0	0	0	0	0	f(B6xCAST)-cM	J
	f(CASTxB6)-cM	-0.0258201	0.79426	0.133128	0.34829	0.243231	0.24851	0.418682	0.0654401		0	0	0	0	0	f(CASTxB6)-cM	J
	m(B6xCAST)-cM	-0.142157	0.1106	-0.0894501	0.51839	-0.105227	0.6276	-0.12511	0.61482		0	0	0	0	0	m(B6xCAST)-cM	J
	m(CASTxB6)-cM	-0.141167	0.11954	-0.158688	0.24482	-0.215726	0.3022	-0.192154	0.40377		0	0	0	0	0	m(CASTxB6)-cM	J
	female-cM	-0.0179651	0.85827	0.143571	0.32152	0.228907	0.27189	0.347664	0.13614		0	0	0	0	0	female-cM	J
	male-cM	-0.149637	0.10068	-0.135033	0.32715	-0.177849	0.41016	-0.175721	0.46825		0	0	0	0	0	male-cM	J
	ave-cM	-0.0990861	0.3035	0.0067761	0.96362	0.0313121	0.88644	0.104887	0.6668		0	0	0	0	0	ave-cM	J
93-103	f(B6xCAST)-cM/Mb	-0.0072871	0.94335	0.13627	0.34226	0.186359	0.35873	0.268213	0.25801		0	0	0	0	0	f(B6xCAST)-cM/Mb	J
	f(CASTxB6)-cM/Mb	-0.0258201	0.79585	0.133128	0.348	0.243231	0.24811	0.418682	0.0642701		0	0	0	0	0	f(CASTxB6)-cM/Mb	J
	m(B6xCAST)-cM/Mb	-0.142157	0.11067	-0.0894501	0.51706	-0.105227	0.62737	-0.12511	0.60894		0	0	0	0	0	m(B6xCAST)-cM/Mb	J
	m(CASTxB6)-cM/Mb	-0.141167	0.12149	-0.158688	0.24654	-0.215726	0.30214	-0.192154	0.4028		0	0	0	0	0	m(CASTxB6)-cM/Mb	J
	female-cM/Mb	-0.0179651	0.85926	0.143571	0.3244	0.228907	0.27091	0.347664	0.13663		0	0	0	0	0	female-cM/Mb	J
	male-cM/Mb	-0.149637	0.10068	-0.135033	0.32496	-0.177848	0.41505	-0.175721	0.46759		0	0	0	0	0	male-cM/Mb	J
	ave-cM/Mb	-0.0990861	0.30163	0.0067761	0.96344	0.0313121	0.88422	0.104886	0.66595		0	0	0	0	0	ave-cM/Mb	J
103-113	f(B6xCAST)-cM	-0.116882	0.23395	-0.19394	0.16247	-0.320379	0.11	-0.262001	0.29048		0	0	0	0	0	f(B6xCAST)-cM	K
	f(CASTxB6)-cM	-0.0720981	0.4847	-0.158171	0.26207	-0.247084	0.23153	-0.202723	0.49742		0	0	0	0	0	f(CASTxB6)-cM	K
	m(B6xCAST)-cM	-0.0894671	0.37859	-0.16792	0.23172	-0.334486	0.0976901	-0.269853	0.25533		0	0	0	0	0	m(B6xCAST)-cM	K
	m(CASTxB6)-cM	-0.142677	0.143	-0.245009	0.0768601	-0.428007	0.0320301	-0.420656	0.0660801		0	0	111111	0	111111	m(CASTxB6)-cM	K
	female-cM	-0.0979061	0.33176	-0.184603	0.1868	-0.294739	0.14703	-0.23536	0.36964		0	0	0	0	0	female-cM	K
	male-cM	-0.12249	0.21288	-0.217861	0.11501	-0.400666	0.0459101	-0.372708	0.10596		0	0	111111	0	111111	male-cM	K
	ave-cM	-0.119317	0.22729	-0.219508	0.11585	-0.379019	0.0582101	-0.326918	0.16914		0	0	0	0	0	ave-cM	K
103-113	f(B6xCAST)-cM/Mb	-0.116882	0.23526	-0.19394	0.16184	-0.320379	0.10979	-0.262001	0.29074		0	0	0	0	0	f(B6xCAST)-cM/Mb	K
	f(CASTxB6)-cM/Mb	-0.0720981	0.48475	-0.158171	0.26269	-0.247084	0.23062	-0.202723	0.49256		0	0	0	0	0	f(CASTxB6)-cM/Mb	K
	m(B6xCAST)-cM/Mb	-0.0894671	0.37666	-0.16792	0.23114	-0.334486	0.0973101	-0.269854	0.25465		0	0	0	0	0	m(B6xCAST)-cM/Mb	K
	m(CASTxB6)-cM/Mb	-0.142677	0.14328	-0.245009	0.0772201	-0.428007	0.0309301	-0.420657	0.0662601		0	0	111111	0	111111	m(CASTxB6)-cM/Mb	K
	female-cM/Mb	-0.0979061	0.33004	-0.184603	0.18661	-0.294739	0.14427	-0.23536	0.37084		0	0	0	0	0	female-cM/Mb	K
	male-cM/Mb	-0.12249	0.21438	-0.217861	0.11447	-0.400666	0.0440901	-0.372708	0.10611		0	0	111111	0	111111	male-cM/Mb	K
	ave-cM/Mb	-0.119317	0.2298	-0.219508	0.11645	-0.379019	0.0593301	-0.326918	0.16972		0	0	0	0	0	ave-cM/Mb	K
113-121.7	f(B6xCAST)-cM	-0.127823	0.20072	-0.224469	0.12341	-0.281082	0.17574	-0.153706	0.53965		0	0	0	0	0	f(B6xCAST)-cM	L
	f(CASTxB6)-cM	-0.0869811	0.39234	-0.102324	0.46866	-0.126701	0.52442	-0.0291521	0.90976		0	0	0	0	0	f(CASTxB6)-cM	L
	m(B6xCAST)-cM	-0.139047	0.18321	-0.170975	0.25421	-0.23037	0.26382	-0.298007	0.22731		0	0	0	0	0	m(B6xCAST)-cM	L
	m(CASTxB6)-cM	-0.142036	0.1785	-0.216425	0.14196	-0.29393	0.17726	-0.293318	0.23781		0	0	0	0	0	m(CASTxB6)-cM	L
	female-cM	-0.110041	0.27167	-0.165526	0.2385	-0.206483	0.2965	-0.0955181	0.70857		0	0	0	0	0	female-cM	L
	male-cM	-0.145998	0.1627	-0.201778	0.17717	-0.273987	0.19766	-0.309252	0.21035		0	0	0	0	0	male-cM	L
	ave-cM	-0.140076	0.17961	-0.197241	0.18126	-0.260888	0.22642	-0.248473	0.3199		0	0	0	0	0	ave-cM	L
113-121.7	f(B6xCAST)-cM/Mb	-0.127823	0.20338	-0.224469	0.12002	-0.281082	0.17662	-0.153706	0.5371		0	0	0	0	0	f(B6xCAST)-cM/Mb	L
	f(CASTxB6)-cM/Mb	-0.0869811	0.39199	-0.102324	0.46774	-0.126701	0.52506	-0.0291511	0.91089		0	0	0	0	0	f(CASTxB6)-cM/Mb	L
	m(B6xCAST)-cM/Mb	-0.139047	0.18052	-0.170975	0.25866	-0.23037	0.26285	-0.298007	0.22651		0	0	0	0	0	m(B6xCAST)-cM/Mb	L
	m(CASTxB6)-cM/Mb	-0.142036	0.17673	-0.216425	0.14115	-0.29393	0.17526	-0.293318	0.23823		0	0	0	0	0	m(CASTxB6)-cM/Mb	L
	female-cM/Mb	-0.110041	0.27094	-0.165526	0.24022	-0.206483	0.29751	-0.0955181	0.70551		0	0	0	0	0	female-cM/Mb	L
	male-cM/Mb	-0.145998	0.16189	-0.201778	0.17344	-0.273987	0.19748	-0.309252	0.2106		0	0	0	0	0	male-cM/Mb	L
	ave-cM/Mb	-0.140076	0.17488	-0.197241	0.18187	-0.260887	0.22698	-0.248473	0.32069		0	0	0	0	0	ave-cM/Mb	L
3-11.7	f(B6xCAST)-cM	0.0307141	0.77555	0.116095	0.45215	0.259433	0.23795	0.248836	0.31517		0	0	0	0	0	f(B6xCAST)-cM	o
	f(CASTxB6)-cM	0.0543951	0.61088	0.132435	0.38736	0.235737	0.29231	0.262579	0.28589		0	0	0	0	0	f(CASTxB6)-cM	o
	m(B6xCAST)-cM	-0.145953	0.17316	-0.160543	0.30079	-0.0471721	0.83778	-0.0999001	0.69066		0	0	0	0	0	m(B6xCAST)-cM	o
	m(CASTxB6)-cM	-0.0767321	0.48389	-0.0874021	0.57867	-0.0191071	0.93225	-0.0118901	0.96273		0	0	0	0	0	m(CASTxB6)-cM	o
	female-cM	0.0457321	0.67124	0.128635	0.40052	0.250874	0.25607	0.265204	0.27965		0	0	0	0	0	female-cM	o
	male-cM	-0.125724	0.24104	-0.13543	0.39124	-0.0372511	0.8721	-0.0660921	0.794		0	0	0	0	0	male-cM	o
	ave-cM	-0.0105441	0.92354	0.0365141	0.81583	0.172814	0.44115	0.183321	0.4591		0	0	0	0	0	ave-cM	o
3-11.7	f(B6xCAST)-cM/Mb	0.0307141	0.77643	0.116095	0.44542	0.259433	0.23882	0.248836	0.3129		0	0	0	0	0	f(B6xCAST)-cM/Mb	o
	f(CASTxB6)-cM/Mb	0.0543951	0.61841	0.132435	0.38644	0.235737	0.28998	0.262579	0.28604		0	0	0	0	0	f(CASTxB6)-cM/Mb	o
	m(B6xCAST)-cM/Mb	-0.145953	0.17241	-0.160543	0.30229	-0.0471721	0.83927	-0.0998991	0.69589		0	0	0	0	0	m(B6xCAST)-cM/Mb	o
	m(CASTxB6)-cM/Mb	-0.0767321	0.48216	-0.0874021	0.57778	-0.0191071	0.93334	-0.0118901	0.96316		0	0	0	0	0	m(CASTxB6)-cM/Mb	o
	female-cM/Mb	0.0457321	0.67332	0.128635	0.39836	0.250875	0.25721	0.265204	0.28088		0	0	0	0	0	female-cM/Mb	o
	male-cM/Mb	-0.125724	0.24002	-0.13543	0.3903	-0.0372511	0.87283	-0.0660911	0.78937		0	0	0	0	0	male-cM/Mb	o
	ave-cM/Mb	-0.0105441	0.92466	0.0365141	0.81401	0.172814	0.44163	0.183322	0.46048		0	0	0	0	0	ave-cM/Mb	o
11.7-21.7	f(B6xCAST)-cM	-0.196037	0.0370401	-0.181485	0.22464	-0.186093	0.39915	-0.221934	0.38032		111111	0	0	0	111111	f(B6xCAST)-cM	p
	f(CASTxB6)-cM	-0.18045	0.0632801	-0.156689	0.30129	-0.144312	0.50961	-0.147261	0.55713		0	0	0	0	0	f(CASTxB6)-cM	p
	m(B6xCAST)-cM	-0.212412	0.0218801	-0.239926	0.0880701	-0.279007	0.18058	-0.355067	0.12753		111111	0	0	0	111111	m(B6xCAST)-cM	p
	m(CASTxB6)-cM	-0.24674	0.0076301	-0.250487	0.0750301	-0.293042	0.16191	-0.312877	0.19879		111111	0	0	0	111111	m(CASTxB6)-cM	p
	female-cM	-0.189222	0.0467001	-0.170285	0.25818	-0.165981	0.45584	-0.18541	0.46684		111111	0	0	0	111111	female-cM	p
	male-cM	-0.231813	0.0110801	-0.247553	0.0776701	-0.287529	0.16653	-0.337937	0.15312		111111	0	0	0	111111	male-cM	p
	ave-cM	-0.240509	0.0104801	-0.241567	0.0927701	-0.269322	0.20203	-0.325089	0.17058		111111	0	0	0	111111	ave-cM	p
11.7-21.7	f(B6xCAST)-cM/Mb	-0.196037	0.0363201	-0.181485	0.22413	-0.186093	0.4028	-0.221933	0.38042		111111	0	0	0	111111	f(B6xCAST)-cM/Mb	p
	f(CASTxB6)-cM/Mb	-0.18045	0.0642001	-0.156689	0.30065	-0.144312	0.51288	-0.147261	0.55907		0	0	0	0	0	f(CASTxB6)-cM/Mb	p
	m(B6xCAST)-cM/Mb	-0.212413	0.0226901	-0.239926	0.0889001	-0.279007	0.17906	-0.355067	0.127		111111	0	0	0	111111	m(B6xCAST)-cM/Mb	p
	m(CASTxB6)-cM/Mb	-0.24674	0.0080401	-0.250487	0.0742201	-0.293041	0.16207	-0.312877	0.19503		111111	0	0	0	111111	m(CASTxB6)-cM/Mb	p
	female-cM/Mb	-0.189222	0.0475201	-0.170285	0.25806	-0.165981	0.45317	-0.185409	0.46846		111111	0	0	0	111111	female-cM/Mb	p
	male-cM/Mb	-0.231813	0.0116201	-0.247553	0.0771401	-0.287529	0.16759	-0.337937	0.15273		111111	0	0	0	111111	male-cM/Mb	p
	ave-cM/Mb	-0.240509	0.0108301	-0.241567	0.0922801	-0.269322	0.20122	-0.325089	0.17315		111111	0	0	0	111111	ave-cM/Mb	p
21.7-31.7	f(B6xCAST)-cM	-0.0572031	0.57992	0.0081861	0.957	0.0305491	0.88695	0.0247421	0.9184		0	0	0	0	0	f(B6xCAST)-cM	q
	f(CASTxB6)-cM	-0.0702721	0.50037	0.0508731	0.7278	0.0974221	0.63834	0.0599141	0.80264		0	0	0	0	0	f(CASTxB6)-cM	q
	m(B6xCAST)-cM	-0.377279	3.01e-05	-0.457344	0.0004801	-0.583932	0.0013101	-0.701638	0.0001701		111111	111111	111111	111111	444444	m(B6xCAST)-cM	q
	m(CASTxB6)-cM	-0.155741	0.12248	-0.117115	0.4201	-0.158137	0.44463	-0.16695	0.48975		0	0	0	0	0	m(CASTxB6)-cM	q
	female-cM	-0.0670221	0.51844	0.0317891	0.82781	0.0681941	0.74395	0.0449671	0.85288		0	0	0	0	0	female-cM	q
	male-cM	-0.3013	0.0016901	-0.335635	0.0154301	-0.4509	0.0228701	-0.538413	0.0138901		111111	111111	111111	111111	444444	male-cM	q
	ave-cM	-0.179588	0.0720701	-0.142773	0.32391	-0.175341	0.39977	-0.21331	0.37223		0	0	0	0	0	ave-cM	q
21.7-31.7	f(B6xCAST)-cM/Mb	-0.0572031	0.57621	0.0081861	0.95615	0.0305491	0.88449	0.0247421	0.91779		0	0	0	0	0	f(B6xCAST)-cM/Mb	q
	f(CASTxB6)-cM/Mb	-0.0702721	0.50213	0.0508731	0.73067	0.0974231	0.63711	0.0599151	0.80629		0	0	0	0	0	f(CASTxB6)-cM/Mb	q
	m(B6xCAST)-cM/Mb	-0.377279	1e-07	-0.457344	0.0004901	-0.583932	0.0014101	-0.701639	0.0001401		111111	111111	111111	111111	444444	m(B6xCAST)-cM/Mb	q
	m(CASTxB6)-cM/Mb	-0.155741	0.12229	-0.117116	0.41739	-0.158137	0.44761	-0.16695	0.49014		0	0	0	0	0	m(CASTxB6)-cM/Mb	q
	female-cM/Mb	-0.0670221	0.5208	0.0317891	0.82848	0.0681941	0.74119	0.0449681	0.85188		0	0	0	0	0	female-cM/Mb	q
	male-cM/Mb	-0.3013	0.0016601	-0.335636	0.0163001	-0.450901	0.0222801	-0.538413	0.0137201		111111	111111	111111	111111	444444	male-cM/Mb	q
	ave-cM/Mb	-0.179588	0.0721401	-0.142773	0.32267	-0.175341	0.39855	-0.21331	0.37365		0	0	0	0	0	ave-cM/Mb	q
31.7-41.7	f(B6xCAST)-cM	-0.138402	0.16814	-0.211225	0.13607	-0.25361	0.22083	-0.206108	0.38762		0	0	0	0	0	f(B6xCAST)-cM	r
	f(CASTxB6)-cM	-0.146005	0.14484	-0.243676	0.0833001	-0.293418	0.15337	-0.287846	0.21963		0	0	0	0	0	f(CASTxB6)-cM	r
	m(B6xCAST)-cM	-0.254405	0.0088101	-0.363662	0.0078301	-0.482821	0.0127901	-0.516151	0.0174801		111111	111111	111111	111111	444444	m(B6xCAST)-cM	r
	m(CASTxB6)-cM	-0.227122	0.0204501	-0.298683	0.0335301	-0.374566	0.0635401	-0.32714	0.16012		111111	111111	0	0	222222	m(CASTxB6)-cM	r
	female-cM	-0.14661	0.14421	-0.233047	0.1003	-0.280455	0.17304	-0.251799	0.28814		0	0	0	0	0	female-cM	r
	male-cM	-0.253068	0.0092301	-0.34711	0.0109201	-0.452068	0.0216101	-0.436834	0.0536601		111111	111111	111111	0	333333	male-cM	r
	ave-cM	-0.201086	0.0397701	-0.29613	0.0327001	-0.379068	0.0594201	-0.358778	0.1206		111111	111111	0	0	222222	ave-cM	r
31.7-41.7	f(B6xCAST)-cM/Mb	-0.138402	0.16931	-0.211225	0.13594	-0.25361	0.22186	-0.206108	0.38775		0	0	0	0	0	f(B6xCAST)-cM/Mb	r
	f(CASTxB6)-cM/Mb	-0.146005	0.14552	-0.243676	0.0848001	-0.293418	0.15352	-0.287846	0.2185		0	0	0	0	0	f(CASTxB6)-cM/Mb	r
	m(B6xCAST)-cM/Mb	-0.254405	0.0087301	-0.363662	0.0075101	-0.482821	0.0125101	-0.516151	0.0180701		111111	111111	111111	111111	444444	m(B6xCAST)-cM/Mb	r
	m(CASTxB6)-cM/Mb	-0.227122	0.0201401	-0.298683	0.0334501	-0.374566	0.0647001	-0.32714	0.16012		111111	111111	0	0	222222	m(CASTxB6)-cM/Mb	r
	female-cM/Mb	-0.14661	0.14138	-0.233047	0.10018	-0.280455	0.17344	-0.251799	0.28869		0	0	0	0	0	female-cM/Mb	r
	male-cM/Mb	-0.253068	0.0094101	-0.34711	0.0112801	-0.452068	0.0219901	-0.436834	0.0543701		111111	111111	111111	0	333333	male-cM/Mb	r
	ave-cM/Mb	-0.201086	0.0386001	-0.29613	0.0337301	-0.379068	0.0592801	-0.358778	0.11897		111111	111111	0	0	222222	ave-cM/Mb	r
41.7-51.7	f(B6xCAST)-cM	-0.149956	0.13515	-0.176792	0.22031	-0.261049	0.20698	-0.211766	0.37991		0	0	0	0	0	f(B6xCAST)-cM	s
	f(CASTxB6)-cM	-0.188363	0.0586501	-0.22226	0.12338	-0.304462	0.14155	-0.163294	0.49102		0	0	0	0	0	f(CASTxB6)-cM	s
	m(B6xCAST)-cM	-0.114044	0.25438	-0.185389	0.2031	-0.292774	0.15901	-0.13745	0.57973		0	0	0	0	0	m(B6xCAST)-cM	s
	m(CASTxB6)-cM	-0.123187	0.21837	-0.19978	0.16959	-0.301534	0.14704	-0.105797	0.66628		0	0	0	0	0	m(CASTxB6)-cM	s
	female-cM	-0.185777	0.0639601	-0.218797	0.12573	-0.306197	0.13541	-0.199762	0.40027		0	0	0	0	0	female-cM	s
	male-cM	-0.119717	0.23187	-0.194192	0.18074	-0.298668	0.15212	-0.121613	0.61868		0	0	0	0	0	male-cM	s
	ave-cM	-0.157031	0.11613	-0.220844	0.12495	-0.332137	0.10698	-0.156534	0.52122		0	0	0	0	0	ave-cM	s
41.7-51.7	f(B6xCAST)-cM/Mb	-0.149956	0.13338	-0.176792	0.22176	-0.261049	0.20449	-0.211766	0.37626		0	0	0	0	0	f(B6xCAST)-cM/Mb	s
	f(CASTxB6)-cM/Mb	-0.188363	0.0607901	-0.22226	0.12132	-0.304462	0.14174	-0.163294	0.49148		0	0	0	0	0	f(CASTxB6)-cM/Mb	s
	m(B6xCAST)-cM/Mb	-0.114044	0.25446	-0.185389	0.20152	-0.292774	0.16222	-0.13745	0.57801		0	0	0	0	0	m(B6xCAST)-cM/Mb	s
	m(CASTxB6)-cM/Mb	-0.123187	0.21988	-0.19978	0.16826	-0.301534	0.14921	-0.105797	0.66361		0	0	0	0	0	m(CASTxB6)-cM/Mb	s
	female-cM/Mb	-0.185777	0.0633601	-0.218797	0.12822	-0.306196	0.13561	-0.199762	0.4017		0	0	0	0	0	female-cM/Mb	s
	male-cM/Mb	-0.119717	0.23291	-0.194192	0.17783	-0.298668	0.15444	-0.121613	0.62174		0	0	0	0	0	male-cM/Mb	s
	ave-cM/Mb	-0.157031	0.11749	-0.220844	0.12778	-0.332137	0.10646	-0.156534	0.52228		0	0	0	0	0	ave-cM/Mb	s
51.7-61.7	f(B6xCAST)-cM	0.298145	0.0055001	0.422629	0.0045101	0.373285	0.0651301	0.476387	0.0327201		111111	111111	0	111111	333333	f(B6xCAST)-cM	t
	f(CASTxB6)-cM	0.279954	0.0199901	0.309196	0.0371901	0.192034	0.36251	0.28904	0.21969		111111	111111	0	0	222222	f(CASTxB6)-cM	t
	m(B6xCAST)-cM	0.147029	0.12717	0.134025	0.35296	-0.0137881	0.95151	0.0923261	0.69949		0	0	0	0	0	m(B6xCAST)-cM	t
	m(CASTxB6)-cM	-0.0148291	0.88156	-0.0579901	0.70648	-0.228513	0.27324	-0.149	0.53777		0	0	0	0	0	m(CASTxB6)-cM	t
	female-cM	0.305356	0.0099301	0.375395	0.0134001	0.289979	0.1596	0.404445	0.0778801		111111	111111	0	0	222222	female-cM	t
	male-cM	0.0490961	0.6173	0.0143081	0.92639	-0.157302	0.46196	-0.0571851	0.81428		0	0	0	0	0	male-cM	t
	ave-cM	0.149415	0.12339	0.152945	0.28179	-0.0002711	0.99904	0.13325	0.5775		0	0	0	0	0	ave-cM	t
51.7-61.7	f(B6xCAST)-cM/Mb	0.298144	0.0055601	0.422629	0.0043201	0.373285	0.0635401	0.476387	0.0321201		111111	111111	0	111111	333333	f(B6xCAST)-cM/Mb	t
	f(CASTxB6)-cM/Mb	0.279954	0.0197701	0.309196	0.0377201	0.192034	0.35949	0.289041	0.21954		111111	111111	0	0	222222	f(CASTxB6)-cM/Mb	t
	m(B6xCAST)-cM/Mb	0.147029	0.12561	0.134026	0.35329	-0.0137881	0.94906	0.0923261	0.70143		0	0	0	0	0	m(B6xCAST)-cM/Mb	t
	m(CASTxB6)-cM/Mb	-0.0148291	0.88083	-0.0579901	0.70884	-0.228513	0.2742	-0.149	0.5353		0	0	0	0	0	m(CASTxB6)-cM/Mb	t
	female-cM/Mb	0.305356	0.0106301	0.375395	0.0135301	0.289979	0.16266	0.404445	0.0764701		111111	111111	0	0	222222	female-cM/Mb	t
	male-cM/Mb	0.0490961	0.61727	0.0143081	0.92634	-0.157302	0.46184	-0.0571841	0.81511		0	0	0	0	0	male-cM/Mb	t
	ave-cM/Mb	0.149415	0.12079	0.152945	0.28384	-0.0002721	0.99886	0.133251	0.5789		0	0	0	0	0	ave-cM/Mb	t
61.7-71.7	f(B6xCAST)-cM	-0.0966021	0.32473	-0.0771691	0.57779	-0.0776031	0.69561	-0.0519141	0.82013		0	0	0	0	0	f(B6xCAST)-cM	u
	f(CASTxB6)-cM	-0.0080901	0.93306	0.0325131	0.80683	0.0590541	0.76492	0.0237971	0.9169		0	0	0	0	0	f(CASTxB6)-cM	u
	m(B6xCAST)-cM	-0.0595151	0.51465	-0.0565531	0.65259	-0.0721021	0.70587	0.0494911	0.83334		0	0	0	0	0	m(B6xCAST)-cM	u
	m(CASTxB6)-cM	-0.0426961	0.64792	-0.0458891	0.72425	-0.0592481	0.75301	0.0282191	0.91235		0	0	0	0	0	m(CASTxB6)-cM	u
	female-cM	-0.0571201	0.55621	-0.0256421	0.85164	-0.0121551	0.95241	-0.0177371	0.93924		0	0	0	0	0	female-cM	u
	male-cM	-0.0508201	0.58435	-0.0510781	0.68814	-0.0657971	0.72588	0.0383141	0.87625		0	0	0	0	0	male-cM	u
	ave-cM	-0.0638541	0.49017	-0.0514561	0.68947	-0.0566971	0.77882	0.0224451	0.92226		0	0	0	0	0	ave-cM	u
61.7-71.7	f(B6xCAST)-cM/Mb	-0.0966021	0.32343	-0.0771691	0.57825	-0.0776031	0.69458	-0.0519131	0.82066		0	0	0	0	0	f(B6xCAST)-cM/Mb	u
	f(CASTxB6)-cM/Mb	-0.0080901	0.9334	0.0325131	0.80959	0.0590541	0.76335	0.0237981	0.9175		0	0	0	0	0	f(CASTxB6)-cM/Mb	u
	m(B6xCAST)-cM/Mb	-0.0595151	0.51051	-0.0565531	0.65127	-0.0721021	0.70464	0.0494911	0.8344		0	0	0	0	0	m(B6xCAST)-cM/Mb	u
	m(CASTxB6)-cM/Mb	-0.0426971	0.65076	-0.0458891	0.71949	-0.0592481	0.75315	0.0282191	0.91244		0	0	0	0	0	m(CASTxB6)-cM/Mb	u
	female-cM/Mb	-0.0571211	0.55594	-0.0256421	0.85326	-0.0121551	0.95199	-0.0177371	0.93847		0	0	0	0	0	female-cM/Mb	u
	male-cM/Mb	-0.0508201	0.58263	-0.0510791	0.68642	-0.0657971	0.72611	0.0383141	0.87711		0	0	0	0	0	male-cM/Mb	u
	ave-cM/Mb	-0.0638541	0.48946	-0.0514561	0.69007	-0.0566981	0.77763	0.0224461	0.92061		0	0	0	0	0	ave-cM/Mb	u
71.7-81.7	f(B6xCAST)-cM	-0.112215	0.18492	-0.177139	0.14677	-0.204062	0.25682	-0.195829	0.41503		0	0	0	0	0	f(B6xCAST)-cM	v
	f(CASTxB6)-cM	-0.186845	0.0516701	-0.247656	0.0670801	-0.238263	0.21609	-0.214882	0.38187		0	0	0	0	0	f(CASTxB6)-cM	v
	m(B6xCAST)-cM	-0.170359	0.0651301	-0.20848	0.0991501	-0.197863	0.32301	-0.225655	0.32533		0	0	0	0	0	m(B6xCAST)-cM	v
	m(CASTxB6)-cM	-0.186991	0.0571101	-0.262	0.0589701	-0.319282	0.0889101	-0.3607	0.10049		0	0	0	0	0	m(CASTxB6)-cM	v
	female-cM	-0.157856	0.0831101	-0.230796	0.0783801	-0.23012	0.20373	-0.227491	0.35099		0	0	0	0	0	female-cM	v
	male-cM	-0.186657	0.0565901	-0.244535	0.0652601	-0.262478	0.13152	-0.306337	0.14422		0	0	0	0	0	male-cM	v
	ave-cM	-0.201684	0.0341201	-0.281169	0.0334901	-0.288086	0.13239	-0.305895	0.1803		111111	111111	0	0	222222	ave-cM	v
71.7-81.7	f(B6xCAST)-cM/Mb	-0.112214	0.18613	-0.17714	0.14866	-0.204062	0.2583	-0.195829	0.41694		0	0	0	0	0	f(B6xCAST)-cM/Mb	v
	f(CASTxB6)-cM/Mb	-0.186845	0.0513201	-0.247655	0.0666901	-0.238264	0.21623	-0.214882	0.38178		0	0	0	0	0	f(CASTxB6)-cM/Mb	v
	m(B6xCAST)-cM/Mb	-0.17036	0.0660201	-0.20848	0.10204	-0.197863	0.32025	-0.225655	0.32392		0	0	0	0	0	m(B6xCAST)-cM/Mb	v
	m(CASTxB6)-cM/Mb	-0.186991	0.0561801	-0.262	0.0593401	-0.319282	0.0873401	-0.3607	0.0999301		0	0	0	0	0	m(CASTxB6)-cM/Mb	v
	female-cM/Mb	-0.157857	0.0839501	-0.230796	0.0786301	-0.230119	0.20169	-0.22749	0.35265		0	0	0	0	0	female-cM/Mb	v
	male-cM/Mb	-0.186657	0.0573601	-0.244535	0.0637501	-0.262478	0.13184	-0.306337	0.14238		0	0	0	0	0	male-cM/Mb	v
	ave-cM/Mb	-0.201682	0.0336401	-0.28117	0.0337801	-0.288086	0.13437	-0.305894	0.18367		111111	111111	0	0	222222	ave-cM/Mb	v
81.7-91.7	f(B6xCAST)-cM	-0.0077741	0.94339	-0.0524881	0.73822	-0.0167111	0.94164	-0.102234	0.70682		0	0	0	0	0	f(B6xCAST)-cM	w
	f(CASTxB6)-cM	0.0216011	0.85305	-0.0295771	0.85187	0.0579471	0.79997	-0.0331791	0.89921		0	0	0	0	0	f(CASTxB6)-cM	w
	m(B6xCAST)-cM	-0.0095641	0.92799	-0.0741091	0.62369	-0.0636121	0.76678	-0.159119	0.54634		0	0	0	0	0	m(B6xCAST)-cM	w
	m(CASTxB6)-cM	0.0335351	0.74272	-0.0544711	0.70672	0.0505251	0.80441	-0.0506551	0.82375		0	0	0	0	0	m(CASTxB6)-cM	w
	female-cM	0.0072251	0.94936	-0.0426931	0.7827	0.0220191	0.92077	-0.0662181	0.80793		0	0	0	0	0	female-cM	w
	male-cM	0.0202091	0.84494	-0.0642561	0.66628	0.0109841	0.95861	-0.0895761	0.70586		0	0	0	0	0	male-cM	w
	ave-cM	0.0132271	0.90714	-0.0541751	0.72397	0.0187491	0.93437	-0.0787901	0.74738		0	0	0	0	0	ave-cM	w
81.7-91.7	f(B6xCAST)-cM/Mb	-0.0077741	0.94458	-0.0524881	0.73641	-0.0167101	0.94073	-0.102234	0.70794		0	0	0	0	0	f(B6xCAST)-cM/Mb	w
	f(CASTxB6)-cM/Mb	0.0216011	0.85394	-0.0295771	0.85385	0.0579471	0.80182	-0.0331791	0.89732		0	0	0	0	0	f(CASTxB6)-cM/Mb	w
	m(B6xCAST)-cM/Mb	-0.0095641	0.92907	-0.0741091	0.62419	-0.0636121	0.76534	-0.15912	0.54424		0	0	0	0	0	m(B6xCAST)-cM/Mb	w
	m(CASTxB6)-cM/Mb	0.0335351	0.74061	-0.0544711	0.70881	0.0505251	0.80519	-0.0506551	0.82319		0	0	0	0	0	m(CASTxB6)-cM/Mb	w
	female-cM/Mb	0.0072251	0.95153	-0.0426931	0.78578	0.0220191	0.9223	-0.0662181	0.80963		0	0	0	0	0	female-cM/Mb	w
	male-cM/Mb	0.0202091	0.84442	-0.0642561	0.6644	0.0109841	0.95896	-0.0895751	0.70753		0	0	0	0	0	male-cM/Mb	w
	ave-cM/Mb	0.0132271	0.90644	-0.0541751	0.72286	0.0187501	0.93306	-0.0787901	0.74644		0	0	0	0	0	ave-cM/Mb	w
91.7-101.7	f(B6xCAST)-cM	-0.148576	0.14471	-0.0906701	0.53878	-0.100861	0.63224	-0.0073871	0.97646		0	0	0	0	0	f(B6xCAST)-cM	x
	f(CASTxB6)-cM	-0.136111	0.17955	-0.0763341	0.6083	-0.0821231	0.70211	0.0809471	0.74495		0	0	0	0	0	f(CASTxB6)-cM	x
	m(B6xCAST)-cM	-0.235143	0.0164901	-0.290079	0.0315601	-0.391815	0.0440801	-0.369434	0.0903201		111111	111111	111111	0	333333	m(B6xCAST)-cM	x
	m(CASTxB6)-cM	-0.221149	0.0189301	-0.294469	0.0244201	-0.392473	0.0366101	-0.321765	0.12208		111111	111111	111111	0	333333	m(CASTxB6)-cM	x
	female-cM	-0.150225	0.14015	-0.0884351	0.54821	-0.0991701	0.6458	0.0328021	0.89676		0	0	0	0	0	female-cM	x
	male-cM	-0.239574	0.0133901	-0.309046	0.0200801	-0.41673	0.0274301	-0.363514	0.0889501		111111	111111	111111	0	333333	male-cM	x
	ave-cM	-0.223895	0.0221701	-0.230052	0.10441	-0.310818	0.13001	-0.203298	0.39238		111111	0	0	0	111111	ave-cM	x
91.7-101.7	f(B6xCAST)-cM/Mb	-0.148575	0.14465	-0.0906701	0.53896	-0.100861	0.63805	-0.0073871	0.97646		0	0	0	0	0	f(B6xCAST)-cM/Mb	x
	f(CASTxB6)-cM/Mb	-0.136111	0.17739	-0.0763341	0.60625	-0.0821231	0.70213	0.0809471	0.74703		0	0	0	0	0	f(CASTxB6)-cM/Mb	x
	m(B6xCAST)-cM/Mb	-0.235143	0.0153301	-0.290079	0.0315801	-0.391815	0.0444201	-0.369434	0.0903401		111111	111111	111111	0	333333	m(B6xCAST)-cM/Mb	x
	m(CASTxB6)-cM/Mb	-0.221149	0.0186901	-0.294469	0.0243901	-0.392473	0.0359901	-0.321765	0.12338		111111	111111	111111	0	333333	m(CASTxB6)-cM/Mb	x
	female-cM/Mb	-0.150225	0.1395	-0.0884351	0.54907	-0.0991701	0.64271	0.0328021	0.89517		0	0	0	0	0	female-cM/Mb	x
	male-cM/Mb	-0.239574	0.0131701	-0.309046	0.0197001	-0.41673	0.0269801	-0.363514	0.0899501		111111	111111	111111	0	333333	male-cM/Mb	x
	ave-cM/Mb	-0.223895	0.0224201	-0.230052	0.10324	-0.310818	0.1279	-0.203298	0.39102		111111	0	0	0	111111	ave-cM/Mb	x
101.7-111.7	f(B6xCAST)-cM	-0.153452	0.10989	-0.216473	0.10698	-0.357156	0.0722201	-0.305272	0.20008		0	0	0	0	0	f(B6xCAST)-cM	y
	f(CASTxB6)-cM	-0.205165	0.0353201	-0.284452	0.0412501	-0.448839	0.0229701	-0.348184	0.13062		111111	111111	111111	0	333333	f(CASTxB6)-cM	y
	m(B6xCAST)-cM	-0.0500501	0.64739	-0.0857901	0.57994	-0.191686	0.37755	-0.0640501	0.80408		0	0	0	0	0	m(B6xCAST)-cM	y
	m(CASTxB6)-cM	-0.14677	0.11876	-0.201898	0.11951	-0.340944	0.0834801	-0.326212	0.18211		0	0	0	0	0	m(CASTxB6)-cM	y
	female-cM	-0.18441	0.0609801	-0.25533	0.0658401	-0.410488	0.0378801	-0.340241	0.14391		0	0	111111	0	111111	female-cM	y
	male-cM	-0.105088	0.2784	-0.153244	0.26504	-0.282697	0.16669	-0.222694	0.38973		0	0	0	0	0	male-cM	y
	ave-cM	-0.131352	0.16573	-0.188301	0.1547	-0.332673	0.0969101	-0.273321	0.26246		0	0	0	0	0	ave-cM	y
101.7-111.7	f(B6xCAST)-cM/Mb	-0.153452	0.11172	-0.216473	0.10811	-0.357156	0.0723301	-0.305272	0.19744		0	0	0	0	0	f(B6xCAST)-cM/Mb	y
	f(CASTxB6)-cM/Mb	-0.205164	0.0358801	-0.284452	0.0404301	-0.448839	0.0224901	-0.348184	0.13422		111111	111111	111111	0	333333	f(CASTxB6)-cM/Mb	y
	m(B6xCAST)-cM/Mb	-0.0500501	0.65104	-0.0857891	0.58307	-0.191686	0.37661	-0.0640511	0.80501		0	0	0	0	0	m(B6xCAST)-cM/Mb	y
	m(CASTxB6)-cM/Mb	-0.14677	0.11992	-0.201898	0.12145	-0.340944	0.0831901	-0.326212	0.18555		0	0	0	0	0	m(CASTxB6)-cM/Mb	y
	female-cM/Mb	-0.184411	0.0603701	-0.25533	0.0649701	-0.410488	0.0363301	-0.340241	0.14421		0	0	111111	0	111111	female-cM/Mb	y
	male-cM/Mb	-0.105088	0.27685	-0.153244	0.26513	-0.282697	0.16444	-0.222694	0.39237		0	0	0	0	0	male-cM/Mb	y
	ave-cM/Mb	-0.131352	0.16479	-0.188301	0.15759	-0.332673	0.0954001	-0.273322	0.26185		0	0	0	0	0	ave-cM/Mb	y
111.7-121.7	f(B6xCAST)-cM	0.182675	0.0737001	0.164726	0.23069	0.22534	0.25279	0.429634	0.0705901		0	0	0	0	0	f(B6xCAST)-cM	z
	f(CASTxB6)-cM	0.269767	0.0177201	0.299941	0.0403101	0.399462	0.0543801	0.511015	0.0367901		111111	111111	0	111111	333333	f(CASTxB6)-cM	z
	m(B6xCAST)-cM	-0.0065801	0.94812	-0.0465971	0.75021	-0.0733911	0.72107	-0.0753601	0.74999		0	0	0	0	0	m(B6xCAST)-cM	z
	m(CASTxB6)-cM	0.0648521	0.51724	-0.0274571	0.85048	-0.0370771	0.8594	0.0996401	0.67286		0	0	0	0	0	m(CASTxB6)-cM	z
	female-cM	0.240044	0.0299001	0.248356	0.0815801	0.334535	0.0975901	0.483475	0.0492201		111111	0	0	111111	222222	female-cM	z
	male-cM	0.0304281	0.7647	-0.0392541	0.78869	-0.0584241	0.77893	0.0156931	0.94788		0	0	0	0	0	male-cM	z
	ave-cM	0.137443	0.16786	0.103835	0.47744	0.143657	0.49925	0.278283	0.22844		0	0	0	0	0	ave-cM	z
111.7-121.7	f(B6xCAST)-cM/Mb	0.182676	0.0733201	0.164726	0.23056	0.22534	0.25646	0.429634	0.0705601		0	0	0	0	0	f(B6xCAST)-cM/Mb	z
	f(CASTxB6)-cM/Mb	0.269767	0.0171301	0.299941	0.0404401	0.399462	0.0540301	0.511015	0.0368701		111111	111111	0	111111	333333	f(CASTxB6)-cM/Mb	z
	m(B6xCAST)-cM/Mb	-0.0065801	0.94823	-0.0465971	0.74909	-0.0733911	0.72236	-0.0753601	0.74902		0	0	0	0	0	m(B6xCAST)-cM/Mb	z
	m(CASTxB6)-cM/Mb	0.0648521	0.51722	-0.0274571	0.84907	-0.0370771	0.8644	0.0996401	0.67438		0	0	0	0	0	m(CASTxB6)-cM/Mb	z
	female-cM/Mb	0.240044	0.0307701	0.248356	0.0819201	0.334536	0.0970201	0.483475	0.0483001		111111	0	0	111111	222222	female-cM/Mb	z
	male-cM/Mb	0.0304281	0.76356	-0.0392541	0.78875	-0.0584241	0.77938	0.0156921	0.94689		0	0	0	0	0	male-cM/Mb	z
	ave-cM/Mb	0.137443	0.1695	0.103835	0.47503	0.143657	0.49799	0.278283	0.23086		0	0	0	0	0	ave-cM/Mb	z

## Sheet: SINE
section (Mbp position)	cross	100.cor	100.sig	200.cor	200.sig	400.cor	400.sig	500.cor	500.sig	111111	100kb	200kb	400kb	500kb	SUM	cross	section
3-13	f(B6xCAST)-cM	-0.0608621	0.54759	-0.0994431	0.48892	-0.156059	0.45891	-0.181473	0.4396		0	0	0	0	0	f(B6xCAST)-cM	A
	f(CASTxB6)-cM	-0.0277241	0.785	-0.0592831	0.68533	-0.122361	0.57386	-0.113977	0.63958		0	0	0	0	0	f(CASTxB6)-cM	A
	m(B6xCAST)-cM	0.0660161	0.52063	0.0645081	0.67888	0.0046101	0.98315	0.0130241	0.95639		0	0	0	0	0	m(B6xCAST)-cM	A
	m(CASTxB6)-cM	0.0261771	0.7984	0.0276071	0.85203	-0.0651061	0.75721	-0.0300001	0.8981		0	0	0	0	0	m(CASTxB6)-cM	A
	female-cM	-0.0426391	0.67919	-0.0782501	0.59255	-0.139226	0.5184	-0.147924	0.53461		0	0	0	0	0	female-cM	A
	male-cM	0.0518721	0.61046	0.0501221	0.74561	-0.0277081	0.89776	-0.0080981	0.97286		0	0	0	0	0	male-cM	A
	ave-cM	-0.0131121	0.89777	-0.0342091	0.81475	-0.109239	0.60793	-0.116527	0.62282		0	0	0	0	0	ave-cM	A
3-13	f(B6xCAST)-cM/Mb	-0.0608621	0.54744	-0.0994431	0.4889	-0.156059	0.46029	-0.181473	0.43993		0	0	0	0	0	f(B6xCAST)-cM/Mb	A
	f(CASTxB6)-cM/Mb	-0.0277251	0.78745	-0.0592831	0.68584	-0.122361	0.57346	-0.113977	0.63946		0	0	0	0	0	f(CASTxB6)-cM/Mb	A
	m(B6xCAST)-cM/Mb	0.0660161	0.52066	0.0645071	0.67792	0.0046111	0.98326	0.0130241	0.95735		0	0	0	0	0	m(B6xCAST)-cM/Mb	A
	m(CASTxB6)-cM/Mb	0.0261771	0.80175	0.0276071	0.85363	-0.0651061	0.7597	-0.0300001	0.89734		0	0	0	0	0	m(CASTxB6)-cM/Mb	A
	female-cM/Mb	-0.0426391	0.67685	-0.0782501	0.58867	-0.139226	0.51539	-0.147924	0.53843		0	0	0	0	0	female-cM/Mb	A
	male-cM/Mb	0.0518721	0.61513	0.0501231	0.74589	-0.0277081	0.89976	-0.0080981	0.9727		0	0	0	0	0	male-cM/Mb	A
	ave-cM/Mb	-0.0131121	0.89838	-0.0342091	0.81406	-0.109239	0.61056	-0.116528	0.61811		0	0	0	0	0	ave-cM/Mb	A
13-23	f(B6xCAST)-cM	-0.0697811	0.45484	-0.100315	0.45504	-0.101273	0.62183	-0.112445	0.6466		0	0	0	0	0	f(B6xCAST)-cM	B
	f(CASTxB6)-cM	-0.0859161	0.35905	-0.130922	0.32979	-0.156285	0.45167	-0.213417	0.37598		0	0	0	0	0	f(CASTxB6)-cM	B
	m(B6xCAST)-cM	0.135795	0.14132	0.25637	0.0824401	0.251213	0.15397	0.322756	0.16763		0	0	0	0	0	m(B6xCAST)-cM	B
	m(CASTxB6)-cM	0.0708721	0.47091	0.146215	0.26468	0.125756	0.5215	0.133953	0.58327		0	0	0	0	0	m(CASTxB6)-cM	B
	female-cM	-0.0786811	0.39779	-0.117012	0.37761	-0.131714	0.52257	-0.167172	0.49181		0	0	0	0	0	female-cM	B
	male-cM	0.109724	0.22977	0.210356	0.11087	0.20068	0.26174	0.242159	0.27872		0	0	0	0	0	male-cM	B
	ave-cM	0.0136091	0.89662	0.0525061	0.72035	0.0534701	0.80756	0.0731041	0.80094		0	0	0	0	0	ave-cM	B
13-23	f(B6xCAST)-cM/Mb	-0.0697811	0.45239	-0.100315	0.45175	-0.101273	0.62408	-0.112445	0.64672		0	0	0	0	0	f(B6xCAST)-cM/Mb	B
	f(CASTxB6)-cM/Mb	-0.0859161	0.35779	-0.130922	0.32772	-0.156286	0.45419	-0.213417	0.37435		0	0	0	0	0	f(CASTxB6)-cM/Mb	B
	m(B6xCAST)-cM/Mb	0.135795	0.13942	0.25637	0.0828901	0.251214	0.15311	0.322756	0.16858		0	0	0	0	0	m(B6xCAST)-cM/Mb	B
	m(CASTxB6)-cM/Mb	0.0708721	0.47013	0.146215	0.26381	0.125756	0.51874	0.133952	0.58107		0	0	0	0	0	m(CASTxB6)-cM/Mb	B
	female-cM/Mb	-0.0786811	0.39834	-0.117012	0.37875	-0.131714	0.52642	-0.167172	0.49428		0	0	0	0	0	female-cM/Mb	B
	male-cM/Mb	0.109724	0.22906	0.210356	0.11398	0.20068	0.2615	0.242159	0.28075		0	0	0	0	0	male-cM/Mb	B
	ave-cM/Mb	0.0136091	0.89552	0.0525061	0.72216	0.0534691	0.80582	0.0731041	0.80193		0	0	0	0	0	ave-cM/Mb	B
23-33	f(B6xCAST)-cM	-0.0926551	0.3577	-0.148225	0.30335	-0.18917	0.33439	-0.171315	0.45454		0	0	0	0	0	f(B6xCAST)-cM	C
	f(CASTxB6)-cM	-0.0230941	0.82123	-0.0771241	0.59954	-0.0972711	0.62526	-0.0898241	0.69696		0	0	0	0	0	f(CASTxB6)-cM	C
	m(B6xCAST)-cM	0.36819	0.0012801	0.408801	0.0068601	0.504153	0.0156501	0.578765	0.0135001		111111	111111	111111	111111	444444	m(B6xCAST)-cM	C
	m(CASTxB6)-cM	0.199456	0.0452901	0.237776	0.0884601	0.271405	0.172	0.273761	0.22423		111111	0	0	0	111111	m(CASTxB6)-cM	C
	female-cM	-0.0594071	0.55347	-0.116242	0.42049	-0.143216	0.46071	-0.130597	0.56581		0	0	0	0	0	female-cM	C
	male-cM	0.304627	0.0045301	0.346161	0.0163601	0.414796	0.0359401	0.449716	0.0435001		111111	111111	111111	111111	444444	male-cM	C
	ave-cM	0.105564	0.28637	0.106687	0.45974	0.124727	0.53931	0.135944	0.55868		0	0	0	0	0	ave-cM	C
23-33	f(B6xCAST)-cM/Mb	-0.0926551	0.35875	-0.148225	0.30661	-0.18917	0.33519	-0.171315	0.45369		0	0	0	0	0	f(B6xCAST)-cM/Mb	C
	f(CASTxB6)-cM/Mb	-0.0230941	0.81832	-0.0771241	0.5985	-0.0972711	0.62839	-0.0898241	0.69448		0	0	0	0	0	f(CASTxB6)-cM/Mb	C
	m(B6xCAST)-cM/Mb	0.36819	0.0013701	0.408801	0.0069201	0.504153	0.0152601	0.578765	0.0128401		111111	111111	111111	111111	444444	m(B6xCAST)-cM/Mb	C
	m(CASTxB6)-cM/Mb	0.199457	0.0459101	0.237777	0.0870201	0.271405	0.17139	0.273762	0.2269		111111	0	0	0	111111	m(CASTxB6)-cM/Mb	C
	female-cM/Mb	-0.0594071	0.55294	-0.116243	0.42016	-0.143216	0.46132	-0.130597	0.55994		0	0	0	0	0	female-cM/Mb	C
	male-cM/Mb	0.304627	0.0050001	0.346161	0.0166601	0.414797	0.0368901	0.449717	0.0443901		111111	111111	111111	111111	444444	male-cM/Mb	C
	ave-cM/Mb	0.105564	0.28508	0.106687	0.46356	0.124727	0.53904	0.135944	0.5555		0	0	0	0	0	ave-cM/Mb	C
33-43	f(B6xCAST)-cM	0.0845051	0.35862	0.169461	0.19833	0.267681	0.17705	-0.0007751	0.99724		0	0	0	0	0	f(B6xCAST)-cM	D
	f(CASTxB6)-cM	0.0755921	0.42332	0.163535	0.22243	0.240471	0.23831	-0.0244161	0.91842		0	0	0	0	0	f(CASTxB6)-cM	D
	m(B6xCAST)-cM	0.134771	0.13981	0.26077	0.0599801	0.517236	0.0181001	0.176594	0.43239		0	0	111111	0	111111	m(B6xCAST)-cM	D
	m(CASTxB6)-cM	0.0743121	0.44446	0.11971	0.39049	0.236797	0.25424	0.0241721	0.92065		0	0	0	0	0	m(CASTxB6)-cM	D
	female-cM	0.0826371	0.37919	0.17103	0.19851	0.261079	0.19858	-0.0128051	0.95783		0	0	0	0	0	female-cM	D
	male-cM	0.11006	0.23742	0.197603	0.14315	0.398181	0.0502701	0.102896	0.67031		0	0	0	0	0	male-cM	D
	ave-cM	0.0979041	0.29253	0.188712	0.16178	0.337276	0.0939401	0.0459711	0.85427		0	0	0	0	0	ave-cM	D
33-43	f(B6xCAST)-cM/Mb	0.0845061	0.35455	0.169461	0.1996	0.267681	0.17778	-0.0007751	0.99753		0	0	0	0	0	f(B6xCAST)-cM/Mb	D
	f(CASTxB6)-cM/Mb	0.0755921	0.42138	0.163536	0.22156	0.240472	0.24003	-0.0244161	0.91927		0	0	0	0	0	f(CASTxB6)-cM/Mb	D
	m(B6xCAST)-cM/Mb	0.134771	0.13825	0.26077	0.0611301	0.517236	0.0190601	0.176594	0.43308		0	0	111111	0	111111	m(B6xCAST)-cM/Mb	D
	m(CASTxB6)-cM/Mb	0.0743121	0.4446	0.11971	0.38965	0.236797	0.25091	0.0241721	0.92173		0	0	0	0	0	m(CASTxB6)-cM/Mb	D
	female-cM/Mb	0.0826371	0.37866	0.17103	0.20246	0.261078	0.19829	-0.0128051	0.95921		0	0	0	0	0	female-cM/Mb	D
	male-cM/Mb	0.11006	0.23746	0.197603	0.14168	0.398181	0.0496001	0.102896	0.67166		0	0	111111	0	111111	male-cM/Mb	D
	ave-cM/Mb	0.0979041	0.29309	0.188712	0.16032	0.337276	0.0949001	0.0459711	0.85334		0	0	0	0	0	ave-cM/Mb	D
43-53	f(B6xCAST)-cM	-0.0066301	0.94926	0.0333311	0.81899	0.159164	0.44701	-0.0318351	0.89501		0	0	0	0	0	f(B6xCAST)-cM	E
	f(CASTxB6)-cM	-0.0748511	0.45925	-0.0502631	0.73117	-0.0319841	0.88068	-0.205431	0.38702		0	0	0	0	0	f(CASTxB6)-cM	E
	m(B6xCAST)-cM	-0.0022701	0.98274	0.0689761	0.64583	0.173094	0.41569	-0.0148651	0.95103		0	0	0	0	0	m(B6xCAST)-cM	E
	m(CASTxB6)-cM	-0.0159821	0.87913	0.0504561	0.73996	0.139025	0.51188	-0.0692021	0.77697		0	0	0	0	0	m(CASTxB6)-cM	E
	female-cM	-0.0466241	0.64482	-0.0115101	0.93741	0.0615111	0.77101	-0.129586	0.58217		0	0	0	0	0	female-cM	E
	male-cM	-0.0095301	0.93089	0.0596091	0.69414	0.155667	0.46661	-0.0436301	0.8557		0	0	0	0	0	male-cM	E
	ave-cM	-0.0239241	0.8192	0.0410071	0.78448	0.140811	0.50502	-0.0752101	0.75296		0	0	0	0	0	ave-cM	E
43-53	f(B6xCAST)-cM/Mb	-0.0066301	0.9486	0.0333311	0.81841	0.159164	0.44557	-0.0318351	0.8938		0	0	0	0	0	f(B6xCAST)-cM/Mb	E
	f(CASTxB6)-cM/Mb	-0.0748511	0.45745	-0.0502631	0.73209	-0.0319851	0.88127	-0.205431	0.38354		0	0	0	0	0	f(CASTxB6)-cM/Mb	E
	m(B6xCAST)-cM/Mb	-0.0022701	0.9831	0.0689761	0.64709	0.173094	0.41499	-0.0148651	0.95039		0	0	0	0	0	m(B6xCAST)-cM/Mb	E
	m(CASTxB6)-cM/Mb	-0.0159821	0.8813	0.0504561	0.73829	0.139025	0.51398	-0.0692021	0.77678		0	0	0	0	0	m(CASTxB6)-cM/Mb	E
	female-cM/Mb	-0.0466231	0.64779	-0.0115101	0.93738	0.0615111	0.77124	-0.129587	0.58203		0	0	0	0	0	female-cM/Mb	E
	male-cM/Mb	-0.0095291	0.92847	0.0596091	0.69197	0.155667	0.46403	-0.0436301	0.85625		0	0	0	0	0	male-cM/Mb	E
	ave-cM/Mb	-0.0239241	0.81905	0.0410071	0.78385	0.140811	0.50209	-0.0752101	0.75034		0	0	0	0	0	ave-cM/Mb	E
53-63	f(B6xCAST)-cM	-0.148563	0.14148	-0.227407	0.11108	-0.233544	0.2641	-0.278471	0.23555		0	0	0	0	0	f(B6xCAST)-cM	F
	f(CASTxB6)-cM	-0.0439711	0.67485	-0.0714491	0.6392	-0.0456101	0.83796	-0.105972	0.66333		0	0	0	0	0	f(CASTxB6)-cM	F
	m(B6xCAST)-cM	-0.151406	0.12432	-0.221402	0.11537	-0.204764	0.34002	-0.319484	0.16742		0	0	0	0	0	m(B6xCAST)-cM	F
	m(CASTxB6)-cM	-0.102219	0.31586	-0.150176	0.30468	-0.0732571	0.72972	-0.287719	0.22051		0	0	0	0	0	m(CASTxB6)-cM	F
	female-cM	-0.0898721	0.37725	-0.14468	0.32725	-0.139862	0.51535	-0.200699	0.40187		0	0	0	0	0	female-cM	F
	male-cM	-0.125168	0.21398	-0.183207	0.2067	-0.129151	0.548	-0.307775	0.18623		0	0	0	0	0	male-cM	F
	ave-cM	-0.127538	0.20361	-0.193527	0.17781	-0.156486	0.45838	-0.341237	0.14125		0	0	0	0	0	ave-cM	F
53-63	f(B6xCAST)-cM/Mb	-0.148563	0.1402	-0.227408	0.11388	-0.233543	0.26297	-0.278471	0.2379		0	0	0	0	0	f(B6xCAST)-cM/Mb	F
	f(CASTxB6)-cM/Mb	-0.0439701	0.67367	-0.0714491	0.638	-0.0456101	0.83701	-0.105973	0.66475		0	0	0	0	0	f(CASTxB6)-cM/Mb	F
	m(B6xCAST)-cM/Mb	-0.151406	0.1249	-0.221402	0.1192	-0.204764	0.34125	-0.319484	0.16949		0	0	0	0	0	m(B6xCAST)-cM/Mb	F
	m(CASTxB6)-cM/Mb	-0.102219	0.3148	-0.150175	0.30521	-0.0732581	0.72788	-0.287719	0.22144		0	0	0	0	0	m(CASTxB6)-cM/Mb	F
	female-cM/Mb	-0.0898721	0.37563	-0.14468	0.32634	-0.139861	0.5151	-0.200699	0.40283		0	0	0	0	0	female-cM/Mb	F
	male-cM/Mb	-0.125168	0.21638	-0.183207	0.20487	-0.129151	0.54776	-0.307775	0.18809		0	0	0	0	0	male-cM/Mb	F
	ave-cM/Mb	-0.127538	0.2038	-0.193527	0.17856	-0.156486	0.45785	-0.341237	0.14146		0	0	0	0	0	ave-cM/Mb	F
63-73	f(B6xCAST)-cM	-0.130084	0.19983	-0.230926	0.1058	-0.321126	0.11567	-0.345363	0.13952		0	0	0	0	0	f(B6xCAST)-cM	G
	f(CASTxB6)-cM	-0.0314921	0.76182	-0.135625	0.35459	-0.217052	0.31073	-0.260243	0.27525		0	0	0	0	0	f(CASTxB6)-cM	G
	m(B6xCAST)-cM	-0.0532501	0.60969	-0.102893	0.48725	-0.168726	0.43584	-0.219693	0.36443		0	0	0	0	0	m(B6xCAST)-cM	G
	m(CASTxB6)-cM	-0.0367651	0.7218	-0.0793021	0.58804	-0.138872	0.51638	-0.168312	0.48029		0	0	0	0	0	m(CASTxB6)-cM	G
	female-cM	-0.0881221	0.39183	-0.200964	0.16391	-0.291148	0.16175	-0.329009	0.15718		0	0	0	0	0	female-cM	G
	male-cM	-0.0482251	0.64061	-0.0984901	0.50548	-0.164143	0.44771	-0.20972	0.38441		0	0	0	0	0	male-cM	G
	ave-cM	-0.0778711	0.4498	-0.170037	0.24398	-0.256444	0.21988	-0.305499	0.19331		0	0	0	0	0	ave-cM	G
63-73	f(B6xCAST)-cM/Mb	-0.130084	0.19992	-0.230926	0.10732	-0.321126	0.11587	-0.345363	0.13797		0	0	0	0	0	f(B6xCAST)-cM/Mb	G
	f(CASTxB6)-cM/Mb	-0.0314931	0.76448	-0.135624	0.35344	-0.217052	0.30752	-0.260243	0.27539		0	0	0	0	0	f(CASTxB6)-cM/Mb	G
	m(B6xCAST)-cM/Mb	-0.0532501	0.60751	-0.102893	0.48813	-0.168726	0.43675	-0.219693	0.36361		0	0	0	0	0	m(B6xCAST)-cM/Mb	G
	m(CASTxB6)-cM/Mb	-0.0367661	0.72011	-0.0793011	0.58876	-0.138872	0.51693	-0.168312	0.481		0	0	0	0	0	m(CASTxB6)-cM/Mb	G
	female-cM/Mb	-0.0881221	0.39361	-0.200964	0.16454	-0.291149	0.15918	-0.329008	0.15841		0	0	0	0	0	female-cM/Mb	G
	male-cM/Mb	-0.0482251	0.64365	-0.0984901	0.50387	-0.164144	0.44559	-0.20972	0.38589		0	0	0	0	0	male-cM/Mb	G
	ave-cM/Mb	-0.0778711	0.45061	-0.170037	0.24336	-0.256444	0.22161	-0.305499	0.19609		0	0	0	0	0	ave-cM/Mb	G
73-83	f(B6xCAST)-cM	-0.0075561	0.94092	-0.0704761	0.64114	-0.0938201	0.669	-0.119998	0.62017		0	0	0	0	0	f(B6xCAST)-cM	H
	f(CASTxB6)-cM	-0.0474971	0.63683	-0.0604761	0.67884	-0.0779791	0.7119	-0.104546	0.66237		0	0	0	0	0	f(CASTxB6)-cM	H
	m(B6xCAST)-cM	0.143278	0.15684	0.184404	0.20314	0.212427	0.30978	0.200308	0.42525		0	0	0	0	0	m(B6xCAST)-cM	H
	m(CASTxB6)-cM	0.164149	0.10293	0.215763	0.13289	0.308121	0.12952	0.328844	0.15428		0	0	0	0	0	m(CASTxB6)-cM	H
	female-cM	-0.0257201	0.80224	-0.0724691	0.62236	-0.0891771	0.68178	-0.122591	0.60707		0	0	0	0	0	female-cM	H
	male-cM	0.158645	0.11418	0.206322	0.15335	0.265295	0.19955	0.275281	0.24846		0	0	0	0	0	male-cM	H
	ave-cM	0.0620441	0.54328	0.0518691	0.72155	0.0704131	0.7396	0.0508161	0.83676		0	0	0	0	0	ave-cM	H
73-83	f(B6xCAST)-cM/Mb	-0.0075561	0.94083	-0.0704761	0.63551	-0.0938201	0.66612	-0.119998	0.61785		0	0	0	0	0	f(B6xCAST)-cM/Mb	H
	f(CASTxB6)-cM/Mb	-0.0474971	0.63912	-0.0604771	0.67662	-0.0779781	0.71549	-0.104545	0.661		0	0	0	0	0	f(CASTxB6)-cM/Mb	H
	m(B6xCAST)-cM/Mb	0.143278	0.15683	0.184404	0.20319	0.212427	0.31261	0.200308	0.4219		0	0	0	0	0	m(B6xCAST)-cM/Mb	H
	m(CASTxB6)-cM/Mb	0.164149	0.10126	0.215762	0.13284	0.308122	0.13144	0.328844	0.15452		0	0	0	0	0	m(CASTxB6)-cM/Mb	H
	female-cM/Mb	-0.0257191	0.80376	-0.0724681	0.62045	-0.0891771	0.68067	-0.122591	0.60679		0	0	0	0	0	female-cM/Mb	H
	male-cM/Mb	0.158645	0.11335	0.206323	0.15109	0.265294	0.20193	0.275282	0.25034		0	0	0	0	0	male-cM/Mb	H
	ave-cM/Mb	0.0620421	0.54196	0.0518701	0.72361	0.0704131	0.74244	0.0508151	0.83392		0	0	0	0	0	ave-cM/Mb	H
83-93	f(B6xCAST)-cM	-0.123694	0.22929	-0.0951131	0.52415	-0.120954	0.56772	-0.0728991	0.76124		0	0	0	0	0	f(B6xCAST)-cM	I
	f(CASTxB6)-cM	-0.111198	0.28301	-0.11459	0.44064	-0.134565	0.5276	-0.113619	0.68736		0	0	0	0	0	f(CASTxB6)-cM	I
	m(B6xCAST)-cM	-0.0584941	0.57291	-0.0428531	0.77826	0.0059721	0.97786	0.0853471	0.72273		0	0	0	0	0	m(B6xCAST)-cM	I
	m(CASTxB6)-cM	-0.0970301	0.36243	-0.12378	0.42603	-0.126576	0.58881	-0.0553601	0.86385		0	0	0	0	0	m(CASTxB6)-cM	I
	female-cM	-0.121287	0.24079	-0.109075	0.4626	-0.133963	0.52758	-0.0986761	0.70141		0	0	0	0	0	female-cM	I
	male-cM	-0.0874941	0.41076	-0.0991461	0.5167	-0.0832981	0.71429	-0.0102801	0.97236		0	0	0	0	0	male-cM	I
	ave-cM	-0.11357	0.27289	-0.111071	0.45914	-0.1216	0.57563	-0.0666681	0.81288		0	0	0	0	0	ave-cM	I
83-93	f(B6xCAST)-cM/Mb	-0.123694	0.22543	-0.0951131	0.52124	-0.120954	0.571	-0.0728991	0.7622		0	0	0	0	0	f(B6xCAST)-cM/Mb	I
	f(CASTxB6)-cM/Mb	-0.111198	0.28206	-0.11459	0.43894	-0.134565	0.52879	-0.113619	0.69029		0	0	0	0	0	f(CASTxB6)-cM/Mb	I
	m(B6xCAST)-cM/Mb	-0.0584941	0.57127	-0.0428531	0.77923	0.0059721	0.97767	0.0853471	0.72117		0	0	0	0	0	m(B6xCAST)-cM/Mb	I
	m(CASTxB6)-cM/Mb	-0.0970301	0.36443	-0.12378	0.42494	-0.126577	0.58688	-0.0553601	0.86322		0	0	0	0	0	m(CASTxB6)-cM/Mb	I
	female-cM/Mb	-0.121287	0.23777	-0.109075	0.46144	-0.133963	0.52647	-0.0986771	0.70016		0	0	0	0	0	female-cM/Mb	I
	male-cM/Mb	-0.0874941	0.40817	-0.0991461	0.51815	-0.0832981	0.71531	-0.0102801	0.97241		0	0	0	0	0	male-cM/Mb	I
	ave-cM/Mb	-0.11357	0.27421	-0.111071	0.45975	-0.1216	0.57577	-0.0666681	0.81656		0	0	0	0	0	ave-cM/Mb	I
93-103	f(B6xCAST)-cM	-0.190905	0.0573201	-0.212152	0.14079	-0.26335	0.20317	-0.301993	0.1994		0	0	0	0	0	f(B6xCAST)-cM	J
	f(CASTxB6)-cM	-0.139305	0.16755	-0.104556	0.47106	-0.2892	0.161	-0.371973	0.10513		0	0	0	0	0	f(CASTxB6)-cM	J
	m(B6xCAST)-cM	-0.0557811	0.5825	0.0334751	0.81799	0.0134411	0.94871	-0.0373371	0.8774		0	0	0	0	0	m(B6xCAST)-cM	J
	m(CASTxB6)-cM	0.0579561	0.56669	0.19493	0.17414	0.16104	0.44446	0.160076	0.49784		0	0	0	0	0	m(CASTxB6)-cM	J
	female-cM	-0.175009	0.0831801	-0.168098	0.245	-0.296689	0.14988	-0.345913	0.1375		0	0	0	0	0	female-cM	J
	male-cM	0.0058961	0.95471	0.129206	0.36898	0.101616	0.63285	0.0836741	0.73062		0	0	0	0	0	male-cM	J
	ave-cM	-0.0883941	0.38303	-0.0244981	0.8652	-0.117291	0.57602	-0.158595	0.50643		0	0	0	0	0	ave-cM	J
93-103	f(B6xCAST)-cM/Mb	-0.190906	0.0585101	-0.212152	0.14037	-0.26335	0.20069	-0.301993	0.19753		0	0	0	0	0	f(B6xCAST)-cM/Mb	J
	f(CASTxB6)-cM/Mb	-0.139305	0.16914	-0.104556	0.47223	-0.2892	0.15926	-0.371973	0.10604		0	0	0	0	0	f(CASTxB6)-cM/Mb	J
	m(B6xCAST)-cM/Mb	-0.0557811	0.58211	0.0334741	0.81839	0.0134401	0.94912	-0.0373371	0.87754		0	0	0	0	0	m(B6xCAST)-cM/Mb	J
	m(CASTxB6)-cM/Mb	0.0579561	0.56972	0.19493	0.17404	0.16104	0.44492	0.160076	0.49735		0	0	0	0	0	m(CASTxB6)-cM/Mb	J
	female-cM/Mb	-0.175009	0.0812401	-0.168098	0.24482	-0.296689	0.14916	-0.345913	0.13712		0	0	0	0	0	female-cM/Mb	J
	male-cM/Mb	0.0058961	0.95394	0.129206	0.37007	0.101616	0.6354	0.0836741	0.72958		0	0	0	0	0	male-cM/Mb	J
	ave-cM/Mb	-0.0883941	0.38045	-0.0244981	0.86697	-0.117291	0.57811	-0.158595	0.50506		0	0	0	0	0	ave-cM/Mb	J
103-113	f(B6xCAST)-cM	-0.101671	0.32725	-0.158208	0.28069	-0.160053	0.46667	-0.243048	0.31358		0	0	0	0	0	f(B6xCAST)-cM	K
	f(CASTxB6)-cM	-0.0674261	0.53292	-0.108623	0.48181	-0.122933	0.59861	-0.163297	0.50403		0	0	0	0	0	f(CASTxB6)-cM	K
	m(B6xCAST)-cM	-0.0760271	0.46996	-0.122531	0.41676	-0.0662511	0.76588	-0.209079	0.39178		0	0	0	0	0	m(B6xCAST)-cM	K
	m(CASTxB6)-cM	-0.0021451	0.98436	-0.0140721	0.92719	0.0369891	0.86975	-0.0416111	0.8715		0	0	0	0	0	m(CASTxB6)-cM	K
	female-cM	-0.0878441	0.40059	-0.139344	0.35208	-0.146961	0.51352	-0.204299	0.39714		0	0	0	0	0	female-cM	K
	male-cM	-0.0378741	0.72315	-0.0683511	0.659	-0.0129121	0.95441	-0.12014	0.63157		0	0	0	0	0	male-cM	K
	ave-cM	-0.0633261	0.54905	-0.107218	0.48156	-0.0817651	0.71539	-0.172031	0.48844		0	0	0	0	0	ave-cM	K
103-113	f(B6xCAST)-cM/Mb	-0.101671	0.32604	-0.158208	0.28341	-0.160053	0.47199	-0.243048	0.31256		0	0	0	0	0	f(B6xCAST)-cM/Mb	K
	f(CASTxB6)-cM/Mb	-0.0674261	0.53542	-0.108623	0.48332	-0.122933	0.59607	-0.163298	0.50549		0	0	0	0	0	f(CASTxB6)-cM/Mb	K
	m(B6xCAST)-cM/Mb	-0.0760271	0.46914	-0.122531	0.41668	-0.0662511	0.76605	-0.209079	0.39251		0	0	0	0	0	m(B6xCAST)-cM/Mb	K
	m(CASTxB6)-cM/Mb	-0.0021451	0.98418	-0.0140721	0.92903	0.0369881	0.86907	-0.0416111	0.87398		0	0	0	0	0	m(CASTxB6)-cM/Mb	K
	female-cM/Mb	-0.0878441	0.40119	-0.139344	0.35036	-0.146961	0.513	-0.204299	0.39613		0	0	0	0	0	female-cM/Mb	K
	male-cM/Mb	-0.0378741	0.7241	-0.0683511	0.65617	-0.0129121	0.95397	-0.12014	0.63319		0	0	0	0	0	male-cM/Mb	K
	ave-cM/Mb	-0.0633261	0.55237	-0.107218	0.48046	-0.0817651	0.71698	-0.172031	0.48873		0	0	0	0	0	ave-cM/Mb	K
113-121.7	f(B6xCAST)-cM	0.182741	0.0877701	0.254446	0.0940801	0.192628	0.39325	0.192182	0.44457		0	0	0	0	0	f(B6xCAST)-cM	L
	f(CASTxB6)-cM	0.144485	0.17953	0.216087	0.15734	0.149407	0.50576	0.198057	0.43117		0	0	0	0	0	f(CASTxB6)-cM	L
	m(B6xCAST)-cM	0.0385471	0.72334	0.116607	0.45475	0.204541	0.36969	0.361263	0.14348		0	0	0	0	0	m(B6xCAST)-cM	L
	m(CASTxB6)-cM	0.200134	0.0615701	0.289764	0.0548701	0.34436	0.11689	0.45273	0.0591501		0	0	0	0	0	m(CASTxB6)-cM	L
	female-cM	0.168346	0.11399	0.241947	0.1121	0.175799	0.43425	0.207821	0.40666		0	0	0	0	0	female-cM	L
	male-cM	0.120425	0.26322	0.210097	0.17093	0.286294	0.19884	0.425035	0.0794301		0	0	0	0	0	male-cM	L
	ave-cM	0.143681	0.18266	0.230944	0.13145	0.258558	0.24779	0.36698	0.13401		0	0	0	0	0	ave-cM	L
113-121.7	f(B6xCAST)-cM/Mb	0.182741	0.0870201	0.254446	0.0949201	0.192627	0.39361	0.192182	0.44258		0	0	0	0	0	f(B6xCAST)-cM/Mb	L
	f(CASTxB6)-cM/Mb	0.144485	0.1783	0.216087	0.15914	0.149407	0.50645	0.198057	0.43048		0	0	0	0	0	f(CASTxB6)-cM/Mb	L
	m(B6xCAST)-cM/Mb	0.0385471	0.72394	0.116607	0.45639	0.204541	0.37032	0.361263	0.1444		0	0	0	0	0	m(B6xCAST)-cM/Mb	L
	m(CASTxB6)-cM/Mb	0.200134	0.0622201	0.289764	0.0554901	0.34436	0.1177	0.45273	0.0575001		0	0	0	0	0	m(CASTxB6)-cM/Mb	L
	female-cM/Mb	0.168346	0.11427	0.241947	0.1127	0.175799	0.43672	0.207821	0.40801		0	0	0	0	0	female-cM/Mb	L
	male-cM/Mb	0.120425	0.26475	0.210097	0.17271	0.286294	0.19922	0.425035	0.0802501		0	0	0	0	0	male-cM/Mb	L
	ave-cM/Mb	0.143681	0.17912	0.230944	0.13146	0.258558	0.2484	0.36698	0.134		0	0	0	0	0	ave-cM/Mb	L
3-11.7	f(B6xCAST)-cM	-0.100431	0.35496	-0.142365	0.35907	-0.195869	0.39002	-0.270661	0.27139		0	0	0	0	0	f(B6xCAST)-cM	o
	f(CASTxB6)-cM	-0.0637121	0.56387	-0.0992041	0.52813	-0.159516	0.50741	-0.196796	0.43341		0	0	0	0	0	f(CASTxB6)-cM	o
	m(B6xCAST)-cM	0.0856321	0.43322	0.0788971	0.64579	0.0183071	0.93979	-0.0061711	0.98137		0	0	0	0	0	m(B6xCAST)-cM	o
	m(CASTxB6)-cM	0.0475471	0.67073	0.0587571	0.71772	-0.0276381	0.90438	-0.0478171	0.84717		0	0	0	0	0	m(CASTxB6)-cM	o
	female-cM	-0.0813791	0.4588	-0.120459	0.44087	-0.178063	0.44919	-0.237104	0.34478		0	0	0	0	0	female-cM	o
	male-cM	0.0749941	0.49215	0.0737541	0.6661	-0.0009941	0.99708	-0.0290921	0.90624		0	0	0	0	0	male-cM	o
	ave-cM	-0.0329001	0.76517	-0.0545141	0.72983	-0.131694	0.5708	-0.190892	0.44017		0	0	0	0	0	ave-cM	o
3-11.7	f(B6xCAST)-cM/Mb	-0.100431	0.35424	-0.142365	0.35759	-0.195869	0.38973	-0.270661	0.27412		0	0	0	0	0	f(B6xCAST)-cM/Mb	o
	f(CASTxB6)-cM/Mb	-0.0637121	0.56548	-0.0992041	0.52813	-0.159516	0.50646	-0.196796	0.43367		0	0	0	0	0	f(CASTxB6)-cM/Mb	o
	m(B6xCAST)-cM/Mb	0.0856311	0.43402	0.0788971	0.64586	0.0183071	0.93962	-0.0061721	0.98077		0	0	0	0	0	m(B6xCAST)-cM/Mb	o
	m(CASTxB6)-cM/Mb	0.0475471	0.67174	0.0587571	0.71904	-0.0276381	0.90604	-0.0478171	0.84793		0	0	0	0	0	m(CASTxB6)-cM/Mb	o
	female-cM/Mb	-0.0813791	0.45559	-0.120459	0.44082	-0.178063	0.44771	-0.237104	0.34105		0	0	0	0	0	female-cM/Mb	o
	male-cM/Mb	0.0749941	0.4903	0.0737541	0.66323	-0.0009951	0.99668	-0.0290911	0.90695		0	0	0	0	0	male-cM/Mb	o
	ave-cM/Mb	-0.0328991	0.7646	-0.0545141	0.73201	-0.131693	0.57109	-0.190892	0.44367		0	0	0	0	0	ave-cM/Mb	o
11.7-21.7	f(B6xCAST)-cM	-0.0254921	0.78698	-0.0464281	0.73398	-0.0317911	0.88014	-0.0169811	0.93965		0	0	0	0	0	f(B6xCAST)-cM	p
	f(CASTxB6)-cM	-0.0439971	0.64369	-0.0783161	0.56378	-0.102013	0.62843	-0.135051	0.5616		0	0	0	0	0	f(CASTxB6)-cM	p
	m(B6xCAST)-cM	0.0709811	0.43267	0.17074	0.15605	0.165473	0.29278	0.245996	0.18938		0	0	0	0	0	m(B6xCAST)-cM	p
	m(CASTxB6)-cM	0.0817111	0.37816	0.15751	0.20987	0.142836	0.4377	0.165424	0.43434		0	0	0	0	0	m(CASTxB6)-cM	p
	female-cM	-0.0352781	0.71629	-0.0631831	0.64195	-0.0691501	0.74412	-0.0793631	0.72612		0	0	0	0	0	female-cM	p
	male-cM	0.0771301	0.39601	0.166486	0.17217	0.156759	0.34842	0.210339	0.2811		0	0	0	0	0	male-cM	p
	ave-cM	0.0200181	0.84339	0.0559941	0.69573	0.0580521	0.78606	0.0976561	0.71025		0	0	0	0	0	ave-cM	p
11.7-21.7	f(B6xCAST)-cM/Mb	-0.0254911	0.79016	-0.0464271	0.73207	-0.0317911	0.88005	-0.0169811	0.93869		0	0	0	0	0	f(B6xCAST)-cM/Mb	p
	f(CASTxB6)-cM/Mb	-0.0439971	0.6482	-0.0783161	0.56387	-0.102013	0.62943	-0.135051	0.56261		0	0	0	0	0	f(CASTxB6)-cM/Mb	p
	m(B6xCAST)-cM/Mb	0.0709811	0.43314	0.17074	0.15756	0.165473	0.29699	0.245996	0.19462		0	0	0	0	0	m(B6xCAST)-cM/Mb	p
	m(CASTxB6)-cM/Mb	0.0817111	0.37552	0.15751	0.20903	0.142836	0.4375	0.165423	0.43453		0	0	0	0	0	m(CASTxB6)-cM/Mb	p
	female-cM/Mb	-0.0352781	0.71608	-0.0631831	0.64151	-0.0691501	0.74598	-0.0793641	0.72705		0	0	0	0	0	female-cM/Mb	p
	male-cM/Mb	0.0771301	0.39223	0.166486	0.17147	0.156758	0.3465	0.210339	0.28303		0	0	0	0	0	male-cM/Mb	p
	ave-cM/Mb	0.0200181	0.84233	0.0559941	0.69683	0.0580521	0.78489	0.0976561	0.71118		0	0	0	0	0	ave-cM/Mb	p
21.7-31.7	f(B6xCAST)-cM	-0.136451	0.16696	-0.204662	0.15102	-0.257769	0.17991	-0.251589	0.25461		0	0	0	0	0	f(B6xCAST)-cM	q
	f(CASTxB6)-cM	-0.0837091	0.38362	-0.156789	0.26071	-0.178107	0.33898	-0.192395	0.35995		0	0	0	0	0	f(CASTxB6)-cM	q
	m(B6xCAST)-cM	0.467031	0.0001001	0.571754	0.0003701	0.621503	0.0064901	0.643666	0.0103801		111111	111111	111111	111111	444444	m(B6xCAST)-cM	q
	m(CASTxB6)-cM	0.156504	0.10527	0.195237	0.16052	0.207593	0.28255	0.170463	0.43771		0	0	0	0	0	m(CASTxB6)-cM	q
	female-cM	-0.114929	0.22949	-0.1882	0.17714	-0.220357	0.23301	-0.226049	0.27805		0	0	0	0	0	female-cM	q
	male-cM	0.353711	0.0016901	0.444863	0.0036001	0.499405	0.0167401	0.502767	0.0280201		111111	111111	111111	111111	444444	male-cM	q
	ave-cM	0.0874841	0.36518	0.0956781	0.50836	0.0983231	0.62001	0.0724531	0.74383		0	0	0	0	0	ave-cM	q
21.7-31.7	f(B6xCAST)-cM/Mb	-0.136451	0.16588	-0.204662	0.15115	-0.257769	0.18145	-0.251589	0.25555		0	0	0	0	0	f(B6xCAST)-cM/Mb	q
	f(CASTxB6)-cM/Mb	-0.0837091	0.38453	-0.156789	0.26128	-0.178108	0.34278	-0.192396	0.36179		0	0	0	0	0	f(CASTxB6)-cM/Mb	q
	m(B6xCAST)-cM/Mb	0.467031	0.0001501	0.571755	0.0004701	0.621503	0.0058701	0.643666	0.0104501		111111	111111	111111	111111	444444	m(B6xCAST)-cM/Mb	q
	m(CASTxB6)-cM/Mb	0.156504	0.10374	0.195238	0.15955	0.207593	0.28007	0.170464	0.43711		0	0	0	0	0	m(CASTxB6)-cM/Mb	q
	female-cM/Mb	-0.114928	0.23113	-0.188201	0.17627	-0.220357	0.23059	-0.226049	0.27731		0	0	0	0	0	female-cM/Mb	q
	male-cM/Mb	0.353711	0.0018301	0.444863	0.0034201	0.499405	0.0166901	0.502767	0.0277601		111111	111111	111111	111111	444444	male-cM/Mb	q
	ave-cM/Mb	0.0874841	0.3703	0.0956781	0.50869	0.0983231	0.61966	0.0724531	0.7448		0	0	0	0	0	ave-cM/Mb	q
31.7-41.7	f(B6xCAST)-cM	0.0285031	0.77204	0.0749491	0.60232	0.108407	0.60086	-0.0788261	0.75908		0	0	0	0	0	f(B6xCAST)-cM	r
	f(CASTxB6)-cM	0.0345691	0.73243	0.0820201	0.56507	0.105237	0.61686	-0.0705351	0.77009		0	0	0	0	0	f(CASTxB6)-cM	r
	m(B6xCAST)-cM	0.128173	0.1836	0.214292	0.12871	0.409375	0.0497301	0.204215	0.39731		0	0	111111	0	111111	m(B6xCAST)-cM	r
	m(CASTxB6)-cM	0.0664631	0.50958	0.0998701	0.49058	0.18129	0.39356	0.0522431	0.82651		0	0	0	0	0	m(CASTxB6)-cM	r
	female-cM	0.0324541	0.75087	0.0805001	0.57965	0.10986	0.60275	-0.0762981	0.75993		0	0	0	0	0	female-cM	r
	male-cM	0.10286	0.29229	0.164206	0.24528	0.313242	0.12873	0.132238	0.58619		0	0	0	0	0	male-cM	r
	ave-cM	0.0660491	0.50051	0.123556	0.38135	0.217577	0.29717	0.0296771	0.90296		0	0	0	0	0	ave-cM	r
31.7-41.7	f(B6xCAST)-cM/Mb	0.0285031	0.77231	0.0749491	0.60406	0.108407	0.60128	-0.0788261	0.75816		0	0	0	0	0	f(B6xCAST)-cM/Mb	r
	f(CASTxB6)-cM/Mb	0.0345691	0.7367	0.0820201	0.56692	0.105237	0.61774	-0.0705351	0.76904		0	0	0	0	0	f(CASTxB6)-cM/Mb	r
	m(B6xCAST)-cM/Mb	0.128173	0.18312	0.214292	0.12922	0.409375	0.0494501	0.204216	0.39602		0	0	111111	0	111111	m(B6xCAST)-cM/Mb	r
	m(CASTxB6)-cM/Mb	0.0664631	0.5087	0.0998701	0.49287	0.181289	0.39071	0.0522431	0.82688		0	0	0	0	0	m(CASTxB6)-cM/Mb	r
	female-cM/Mb	0.0324541	0.75213	0.0805001	0.57844	0.10986	0.60361	-0.0762971	0.76158		0	0	0	0	0	female-cM/Mb	r
	male-cM/Mb	0.10286	0.29085	0.164206	0.24622	0.313242	0.12793	0.132238	0.58959		0	0	0	0	0	male-cM/Mb	r
	ave-cM/Mb	0.0660491	0.49957	0.123556	0.38348	0.217577	0.29547	0.0296771	0.90311		0	0	0	0	0	ave-cM/Mb	r
41.7-51.7	f(B6xCAST)-cM	0.0794891	0.4288	0.158694	0.26813	0.323479	0.10625	0.105569	0.65159		0	0	0	0	0	f(B6xCAST)-cM	s
	f(CASTxB6)-cM	0.0173341	0.86584	0.0731901	0.62061	0.126823	0.55099	-0.0876761	0.72096		0	0	0	0	0	f(CASTxB6)-cM	s
	m(B6xCAST)-cM	0.0620851	0.54215	0.162259	0.24661	0.295935	0.12905	0.0957991	0.68955		0	0	0	0	0	m(B6xCAST)-cM	s
	m(CASTxB6)-cM	0.0510941	0.61827	0.147324	0.29858	0.262321	0.1805	0.0591601	0.80818		0	0	0	0	0	m(CASTxB6)-cM	s
	female-cM	0.0515331	0.61488	0.124923	0.39323	0.236163	0.25863	0.0083921	0.97239		0	0	0	0	0	female-cM	s
	male-cM	0.0567371	0.58204	0.155365	0.26905	0.279197	0.15238	0.0770881	0.75218		0	0	0	0	0	male-cM	s
	ave-cM	0.0612891	0.54174	0.159332	0.26192	0.293158	0.139	0.0586791	0.80579		0	0	0	0	0	ave-cM	s
41.7-51.7	f(B6xCAST)-cM/Mb	0.0794891	0.4321	0.158694	0.26524	0.323479	0.10854	0.105569	0.65562		0	0	0	0	0	f(B6xCAST)-cM/Mb	s
	f(CASTxB6)-cM/Mb	0.0173331	0.86842	0.0731891	0.62117	0.126823	0.55379	-0.0876771	0.72227		0	0	0	0	0	f(CASTxB6)-cM/Mb	s
	m(B6xCAST)-cM/Mb	0.0620851	0.54339	0.162259	0.24702	0.295935	0.12908	0.0957991	0.69002		0	0	0	0	0	m(B6xCAST)-cM/Mb	s
	m(CASTxB6)-cM/Mb	0.0510941	0.61869	0.147324	0.29932	0.262321	0.17957	0.0591601	0.80771		0	0	0	0	0	m(CASTxB6)-cM/Mb	s
	female-cM/Mb	0.0515331	0.61522	0.124923	0.39014	0.236163	0.25832	0.0083911	0.97319		0	0	0	0	0	female-cM/Mb	s
	male-cM/Mb	0.0567371	0.58359	0.155365	0.26707	0.279197	0.1549	0.0770881	0.75262		0	0	0	0	0	male-cM/Mb	s
	ave-cM/Mb	0.0612891	0.54788	0.159332	0.2593	0.293158	0.14179	0.0586791	0.80684		0	0	0	0	0	ave-cM/Mb	s
51.7-61.7	f(B6xCAST)-cM	-0.191964	0.0543601	-0.280066	0.0462501	-0.297706	0.14827	-0.343311	0.13844		0	111111	0	0	111111	f(B6xCAST)-cM	t
	f(CASTxB6)-cM	-0.101588	0.31555	-0.136673	0.3583	-0.147354	0.49044	-0.143237	0.54977		0	0	0	0	0	f(CASTxB6)-cM	t
	m(B6xCAST)-cM	-0.11731	0.24813	-0.17192	0.24079	-0.153453	0.47403	-0.250963	0.29063		0	0	0	0	0	m(B6xCAST)-cM	t
	m(CASTxB6)-cM	-0.0445861	0.66776	-0.0735151	0.62465	0.0352581	0.86949	-0.186627	0.43376		0	0	0	0	0	m(CASTxB6)-cM	t
	female-cM	-0.144216	0.14902	-0.206202	0.15096	-0.227736	0.27475	-0.252709	0.28302		0	0	0	0	0	female-cM	t
	male-cM	-0.0750111	0.47206	-0.114905	0.44164	-0.0360081	0.8656	-0.219947	0.35396		0	0	0	0	0	male-cM	t
	ave-cM	-0.107516	0.29354	-0.161265	0.27361	-0.119394	0.57518	-0.275764	0.24079		0	0	0	0	0	ave-cM	t
51.7-61.7	f(B6xCAST)-cM/Mb	-0.191963	0.0539901	-0.280066	0.0462101	-0.297706	0.15053	-0.343311	0.13914		0	111111	0	0	111111	f(B6xCAST)-cM/Mb	t
	f(CASTxB6)-cM/Mb	-0.101588	0.3172	-0.136673	0.35858	-0.147354	0.48973	-0.143237	0.54643		0	0	0	0	0	f(CASTxB6)-cM/Mb	t
	m(B6xCAST)-cM/Mb	-0.11731	0.24611	-0.17192	0.24134	-0.153453	0.47361	-0.250963	0.29062		0	0	0	0	0	m(B6xCAST)-cM/Mb	t
	m(CASTxB6)-cM/Mb	-0.0445861	0.67138	-0.0735141	0.62405	0.0352581	0.86756	-0.186627	0.43175		0	0	0	0	0	m(CASTxB6)-cM/Mb	t
	female-cM/Mb	-0.144216	0.14689	-0.206202	0.15056	-0.227735	0.27737	-0.25271	0.285		0	0	0	0	0	female-cM/Mb	t
	male-cM/Mb	-0.0750111	0.47332	-0.114905	0.44125	-0.0360081	0.86606	-0.219947	0.35383		0	0	0	0	0	male-cM/Mb	t
	ave-cM/Mb	-0.107516	0.29193	-0.161265	0.27101	-0.119393	0.57597	-0.275764	0.24182		0	0	0	0	0	ave-cM/Mb	t
61.7-71.7	f(B6xCAST)-cM	-0.109373	0.28076	-0.218828	0.12814	-0.305633	0.13688	-0.318006	0.17547		0	0	0	0	0	f(B6xCAST)-cM	u
	f(CASTxB6)-cM	-0.0947931	0.3583	-0.202256	0.16047	-0.300762	0.14358	-0.340324	0.14213		0	0	0	0	0	f(CASTxB6)-cM	u
	m(B6xCAST)-cM	-0.0803601	0.43735	-0.127659	0.39026	-0.124622	0.60356	-0.184594	0.52494		0	0	0	0	0	m(B6xCAST)-cM	u
	m(CASTxB6)-cM	-0.0768521	0.45047	-0.117322	0.42828	-0.118604	0.63288	-0.14945	0.65514		0	0	0	0	0	m(CASTxB6)-cM	u
	female-cM	-0.109271	0.285	-0.227055	0.11253	-0.321298	0.11696	-0.346952	0.13362		0	0	0	0	0	female-cM	u
	male-cM	-0.0791051	0.44165	-0.123023	0.40579	-0.122755	0.6188	-0.167073	0.59576		0	0	0	0	0	male-cM	u
	ave-cM	-0.107833	0.2928	-0.192754	0.17755	-0.246116	0.24284	-0.297754	0.21238		0	0	0	0	0	ave-cM	u
61.7-71.7	f(B6xCAST)-cM/Mb	-0.109373	0.28118	-0.218828	0.12752	-0.305632	0.13673	-0.318006	0.17444		0	0	0	0	0	f(B6xCAST)-cM/Mb	u
	f(CASTxB6)-cM/Mb	-0.0947931	0.35495	-0.202255	0.15872	-0.300762	0.1433	-0.340324	0.14277		0	0	0	0	0	f(CASTxB6)-cM/Mb	u
	m(B6xCAST)-cM/Mb	-0.0803591	0.4351	-0.127659	0.38851	-0.124623	0.60455	-0.184594	0.52857		0	0	0	0	0	m(B6xCAST)-cM/Mb	u
	m(CASTxB6)-cM/Mb	-0.0768521	0.44948	-0.117322	0.42832	-0.118604	0.63261	-0.14945	0.6558		0	0	0	0	0	m(CASTxB6)-cM/Mb	u
	female-cM/Mb	-0.109271	0.28489	-0.227055	0.11453	-0.321298	0.11556	-0.346952	0.13311		0	0	0	0	0	female-cM/Mb	u
	male-cM/Mb	-0.0791051	0.43946	-0.123023	0.40672	-0.122755	0.61706	-0.167073	0.59423		0	0	0	0	0	male-cM/Mb	u
	ave-cM/Mb	-0.107833	0.29301	-0.192754	0.17769	-0.246116	0.24533	-0.297754	0.21209		0	0	0	0	0	ave-cM/Mb	u
71.7-81.7	f(B6xCAST)-cM	-0.0221621	0.8262	-0.0824211	0.57136	-0.0994141	0.64097	-0.166022	0.49627		0	0	0	0	0	f(B6xCAST)-cM	v
	f(CASTxB6)-cM	-0.0002471	0.99811	-0.0234171	0.87084	-0.0083401	0.96824	-0.132455	0.57925		0	0	0	0	0	f(CASTxB6)-cM	v
	m(B6xCAST)-cM	0.139089	0.16803	0.16856	0.24359	0.194826	0.35252	0.157835	0.51618		0	0	0	0	0	m(B6xCAST)-cM	v
	m(CASTxB6)-cM	0.133456	0.18712	0.175091	0.22767	0.26102	0.20684	0.293037	0.20338		0	0	0	0	0	m(CASTxB6)-cM	v
	female-cM	-0.0148131	0.88738	-0.0631871	0.66696	-0.0606031	0.77899	-0.167429	0.48153		0	0	0	0	0	female-cM	v
	male-cM	0.142838	0.15581	0.18021	0.21107	0.233356	0.26125	0.235238	0.32796		0	0	0	0	0	male-cM	v
	ave-cM	0.0626941	0.5368	0.0483861	0.73998	0.0772311	0.71866	0.0025461	0.99179		0	0	0	0	0	ave-cM	v
71.7-81.7	f(B6xCAST)-cM/Mb	-0.0221631	0.82769	-0.0824211	0.57404	-0.0994141	0.64544	-0.166021	0.49117		0	0	0	0	0	f(B6xCAST)-cM/Mb	v
	f(CASTxB6)-cM/Mb	-0.0002471	0.99812	-0.0234181	0.87094	-0.0083391	0.96887	-0.132455	0.57976		0	0	0	0	0	f(CASTxB6)-cM/Mb	v
	m(B6xCAST)-cM/Mb	0.139089	0.1655	0.16856	0.24476	0.194826	0.35303	0.157835	0.51671		0	0	0	0	0	m(B6xCAST)-cM/Mb	v
	m(CASTxB6)-cM/Mb	0.133455	0.18439	0.175091	0.22527	0.26102	0.20627	0.293037	0.20077		0	0	0	0	0	m(CASTxB6)-cM/Mb	v
	female-cM/Mb	-0.0148121	0.88465	-0.0631861	0.66376	-0.0606031	0.77898	-0.167429	0.48339		0	0	0	0	0	female-cM/Mb	v
	male-cM/Mb	0.142838	0.15783	0.180211	0.21321	0.233356	0.25693	0.235238	0.32942		0	0	0	0	0	male-cM/Mb	v
	ave-cM/Mb	0.0626921	0.53602	0.0483861	0.73731	0.0772311	0.71732	0.0025451	0.99172		0	0	0	0	0	ave-cM/Mb	v
81.7-91.7	f(B6xCAST)-cM	-0.142639	0.16338	-0.115175	0.43614	-0.151591	0.47605	-0.0776801	0.75105		0	0	0	0	0	f(B6xCAST)-cM	w
	f(CASTxB6)-cM	-0.130204	0.20359	-0.136569	0.35504	-0.161019	0.45042	-0.108626	0.69558		0	0	0	0	0	f(CASTxB6)-cM	w
	m(B6xCAST)-cM	-0.113536	0.2688	-0.111165	0.45804	-0.0971311	0.65425	0.0172541	0.94394		0	0	0	0	0	m(B6xCAST)-cM	w
	m(CASTxB6)-cM	-0.127394	0.21451	-0.168691	0.25944	-0.196648	0.37864	-0.104818	0.71718		0	0	0	0	0	m(CASTxB6)-cM	w
	female-cM	-0.141008	0.16614	-0.130937	0.37951	-0.164026	0.44113	-0.0979991	0.70217		0	0	0	0	0	female-cM	w
	male-cM	-0.127317	0.21499	-0.154927	0.29731	-0.16887	0.44783	-0.0684771	0.80642		0	0	0	0	0	male-cM	w
	ave-cM	-0.142246	0.16335	-0.148042	0.31835	-0.175053	0.41909	-0.0900741	0.74177		0	0	0	0	0	ave-cM	w
81.7-91.7	f(B6xCAST)-cM/Mb	-0.142639	0.16192	-0.115175	0.43707	-0.151591	0.47738	-0.0776801	0.74982		0	0	0	0	0	f(B6xCAST)-cM/Mb	w
	f(CASTxB6)-cM/Mb	-0.130204	0.20158	-0.136569	0.3558	-0.161019	0.45242	-0.108626	0.69651		0	0	0	0	0	f(CASTxB6)-cM/Mb	w
	m(B6xCAST)-cM/Mb	-0.113536	0.26642	-0.111165	0.45898	-0.0971311	0.65587	0.0172551	0.94307		0	0	0	0	0	m(B6xCAST)-cM/Mb	w
	m(CASTxB6)-cM/Mb	-0.127394	0.21499	-0.168691	0.25674	-0.196648	0.37433	-0.104818	0.71733		0	0	0	0	0	m(CASTxB6)-cM/Mb	w
	female-cM/Mb	-0.141008	0.16636	-0.130937	0.37844	-0.164026	0.44064	-0.0979991	0.70225		0	0	0	0	0	female-cM/Mb	w
	male-cM/Mb	-0.127317	0.21352	-0.154927	0.29681	-0.16887	0.44465	-0.0684771	0.80232		0	0	0	0	0	male-cM/Mb	w
	ave-cM/Mb	-0.142245	0.16329	-0.148041	0.31856	-0.175053	0.4169	-0.0900741	0.74216		0	0	0	0	0	ave-cM/Mb	w
91.7-101.7	f(B6xCAST)-cM	-0.0684681	0.50435	-0.0719141	0.62305	-0.0779171	0.71662	-0.156976	0.51309		0	0	0	0	0	f(B6xCAST)-cM	x
	f(CASTxB6)-cM	-0.0380851	0.7107	0.0104151	0.9422	-0.0750041	0.72117	-0.210367	0.37503		0	0	0	0	0	f(CASTxB6)-cM	x
	m(B6xCAST)-cM	0.0787801	0.44197	0.224959	0.11622	0.305848	0.13748	0.224105	0.34381		0	0	0	0	0	m(B6xCAST)-cM	x
	m(CASTxB6)-cM	0.157381	0.11511	0.320565	0.0205701	0.358802	0.0737201	0.310138	0.17619		0	111111	0	0	111111	m(CASTxB6)-cM	x
	female-cM	-0.0556631	0.58602	-0.0316031	0.82955	-0.0822291	0.7001	-0.187483	0.43083		0	0	0	0	0	female-cM	x
	male-cM	0.127493	0.20674	0.293023	0.0368801	0.356151	0.0766401	0.291954	0.20605		0	111111	0	0	111111	male-cM	x
	ave-cM	0.0452761	0.6555	0.149741	0.29733	0.166715	0.42346	0.0680981	0.77468		0	0	0	0	0	ave-cM	x
91.7-101.7	f(B6xCAST)-cM/Mb	-0.0684691	0.50424	-0.0719131	0.62405	-0.0779171	0.71849	-0.156976	0.51186		0	0	0	0	0	f(B6xCAST)-cM/Mb	x
	f(CASTxB6)-cM/Mb	-0.0380861	0.70744	0.0104151	0.94428	-0.0750041	0.72103	-0.210367	0.37648		0	0	0	0	0	f(CASTxB6)-cM/Mb	x
	m(B6xCAST)-cM/Mb	0.0787801	0.43982	0.224958	0.1142	0.305848	0.13597	0.224106	0.34342		0	0	0	0	0	m(B6xCAST)-cM/Mb	x
	m(CASTxB6)-cM/Mb	0.157381	0.11617	0.320565	0.0205001	0.358802	0.0729901	0.310138	0.17724		0	111111	0	0	111111	m(CASTxB6)-cM/Mb	x
	female-cM/Mb	-0.0556631	0.58451	-0.0316031	0.82651	-0.0822291	0.69922	-0.187483	0.43397		0	0	0	0	0	female-cM/Mb	x
	male-cM/Mb	0.127492	0.20641	0.293022	0.0363801	0.356151	0.0779701	0.291954	0.20643		0	111111	0	0	111111	male-cM/Mb	x
	ave-cM/Mb	0.0452761	0.65477	0.149741	0.29677	0.166715	0.42522	0.0680981	0.77347		0	0	0	0	0	ave-cM/Mb	x
101.7-111.7	f(B6xCAST)-cM	-0.0220251	0.8441	-0.0298491	0.86038	0.0557961	0.81505	-0.107529	0.67987		0	0	0	0	0	f(B6xCAST)-cM	y
	f(CASTxB6)-cM	0.0806961	0.42705	0.156302	0.28458	0.289756	0.16678	-0.0049511	0.98428		0	0	0	0	0	f(CASTxB6)-cM	y
	m(B6xCAST)-cM	-0.0600081	0.58026	-0.0957691	0.54796	-0.0307031	0.89587	-0.205671	0.40556		0	0	0	0	0	m(B6xCAST)-cM	y
	m(CASTxB6)-cM	0.0185621	0.87105	0.0254171	0.8857	0.0972581	0.68813	0.0059831	0.98276		0	0	0	0	0	m(CASTxB6)-cM	y
	female-cM	0.0172991	0.8716	0.0403541	0.79924	0.149808	0.5022	-0.0708151	0.7729		0	0	0	0	0	female-cM	y
	male-cM	-0.0184561	0.872	-0.0316741	0.857	0.0393091	0.87292	-0.0892791	0.73956		0	0	0	0	0	male-cM	y
	ave-cM	-0.0075271	0.94668	-0.0092531	0.9582	0.0772981	0.75043	-0.0864701	0.74268		0	0	0	0	0	ave-cM	y
101.7-111.7	f(B6xCAST)-cM/Mb	-0.0220251	0.84452	-0.0298491	0.86273	0.0557951	0.81597	-0.107529	0.68083		0	0	0	0	0	f(B6xCAST)-cM/Mb	y
	f(CASTxB6)-cM/Mb	0.0806961	0.43037	0.156302	0.2852	0.289756	0.16326	-0.0049511	0.98345		0	0	0	0	0	f(CASTxB6)-cM/Mb	y
	m(B6xCAST)-cM/Mb	-0.0600081	0.57741	-0.0957691	0.54886	-0.0307031	0.89544	-0.205671	0.40513		0	0	0	0	0	m(B6xCAST)-cM/Mb	y
	m(CASTxB6)-cM/Mb	0.0185621	0.87054	0.0254171	0.88577	0.0972581	0.6865	0.0059831	0.98286		0	0	0	0	0	m(CASTxB6)-cM/Mb	y
	female-cM/Mb	0.0172991	0.87279	0.0403541	0.80319	0.149808	0.50397	-0.0708151	0.77201		0	0	0	0	0	female-cM/Mb	y
	male-cM/Mb	-0.0184561	0.87195	-0.0316741	0.86105	0.0393091	0.87339	-0.0892801	0.74107		0	0	0	0	0	male-cM/Mb	y
	ave-cM/Mb	-0.0075271	0.94597	-0.0092531	0.95719	0.0772981	0.75057	-0.0864701	0.7411		0	0	0	0	0	ave-cM/Mb	y
111.7-121.7	f(B6xCAST)-cM	-0.0159861	0.87576	-0.0308061	0.83777	-0.154569	0.47514	-0.143317	0.54069		0	0	0	0	0	f(B6xCAST)-cM	z
	f(CASTxB6)-cM	-0.0628561	0.54045	-0.104068	0.48053	-0.233119	0.2675	-0.166559	0.4759		0	0	0	0	0	f(CASTxB6)-cM	z
	m(B6xCAST)-cM	-0.0191191	0.85058	0.0161281	0.9123	0.0748711	0.72263	0.215322	0.3624		0	0	0	0	0	m(B6xCAST)-cM	z
	m(CASTxB6)-cM	0.0986891	0.32551	0.143636	0.32357	0.161669	0.43833	0.221158	0.34757		0	0	0	0	0	m(CASTxB6)-cM	z
	female-cM	-0.0443981	0.66295	-0.0743091	0.61826	-0.2055	0.33124	-0.158978	0.49223		0	0	0	0	0	female-cM	z
	male-cM	0.0415481	0.68302	0.0834261	0.56683	0.124057	0.55476	0.231245	0.32544		0	0	0	0	0	male-cM	z
	ave-cM	0.0022871	0.98279	0.0112761	0.9384	-0.0371021	0.86021	0.0336991	0.88659		0	0	0	0	0	ave-cM	z
111.7-121.7	f(B6xCAST)-cM/Mb	-0.0159871	0.87939	-0.0308061	0.83792	-0.154569	0.47357	-0.143317	0.53987		0	0	0	0	0	f(B6xCAST)-cM/Mb	z
	f(CASTxB6)-cM/Mb	-0.0628561	0.53932	-0.104068	0.4773	-0.233119	0.2693	-0.166559	0.47345		0	0	0	0	0	f(CASTxB6)-cM/Mb	z
	m(B6xCAST)-cM/Mb	-0.0191191	0.85073	0.0161271	0.91121	0.0748711	0.72721	0.215322	0.36196		0	0	0	0	0	m(B6xCAST)-cM/Mb	z
	m(CASTxB6)-cM/Mb	0.0986891	0.32697	0.143636	0.32066	0.161669	0.43915	0.221158	0.34793		0	0	0	0	0	m(CASTxB6)-cM/Mb	z
	female-cM/Mb	-0.0443981	0.66524	-0.0743091	0.61644	-0.205501	0.32953	-0.158978	0.49342		0	0	0	0	0	female-cM/Mb	z
	male-cM/Mb	0.0415481	0.68363	0.0834271	0.56677	0.124057	0.55405	0.231245	0.3265		0	0	0	0	0	male-cM/Mb	z
	ave-cM/Mb	0.0022871	0.98229	0.0112761	0.93852	-0.0371021	0.85966	0.0337001	0.88416		0	0	0	0	0	ave-cM/Mb	z

## Sheet: LTR
section (Mbp position)	cross	100.cor	100.sig	200.cor	200.sig	400.cor	400.sig	500.cor	500.sig	111111	100kb	200kb	400kb	500kb	SUM	cross	section
3-13	f(B6xCAST)-cM	-0.137363	0.17299	-0.1504	0.29712	-0.16328	0.43247	-0.0924811	0.69616		0	0	0	0	0	f(B6xCAST)-cM	A
	f(CASTxB6)-cM	-0.113171	0.25753	-0.104243	0.47153	-0.118044	0.56159	-0.0493961	0.83326		0	0	0	0	0	f(CASTxB6)-cM	A
	m(B6xCAST)-cM	-0.209307	0.0374801	-0.228308	0.10962	-0.310011	0.13373	-0.207378	0.38354		111111	0	0	0	111111	m(B6xCAST)-cM	A
	m(CASTxB6)-cM	-0.261197	0.0094601	-0.302186	0.0339501	-0.328094	0.1098	-0.363257	0.11544		111111	111111	0	0	222222	m(CASTxB6)-cM	A
	female-cM	-0.1274	0.20334	-0.127886	0.37587	-0.141072	0.49553	-0.0713971	0.76441		0	0	0	0	0	female-cM	A
	male-cM	-0.26093	0.0094901	-0.275583	0.0533901	-0.332848	0.10562	-0.309889	0.18261		111111	0	0	0	111111	male-cM	A
	ave-cM	-0.183584	0.0677801	-0.194328	0.17694	-0.218365	0.29416	-0.154639	0.51577		0	0	0	0	0	ave-cM	A
3-13	f(B6xCAST)-cM/Mb	-0.137363	0.17038	-0.1504	0.29616	-0.16328	0.43002	-0.0924811	0.69872		0	0	0	0	0	f(B6xCAST)-cM/Mb	A
	f(CASTxB6)-cM/Mb	-0.113171	0.26258	-0.104243	0.47103	-0.118044	0.56075	-0.0493961	0.837		0	0	0	0	0	f(CASTxB6)-cM/Mb	A
	m(B6xCAST)-cM/Mb	-0.209308	0.0377201	-0.228308	0.10792	-0.310011	0.1354	-0.207377	0.38605		111111	0	0	0	111111	m(B6xCAST)-cM/Mb	A
	m(CASTxB6)-cM/Mb	-0.261197	0.0090201	-0.302186	0.0341801	-0.328093	0.10978	-0.363257	0.11277		111111	111111	0	0	222222	m(CASTxB6)-cM/Mb	A
	female-cM/Mb	-0.1274	0.20511	-0.127887	0.37533	-0.141073	0.49088	-0.0713961	0.76548		0	0	0	0	0	female-cM/Mb	A
	male-cM/Mb	-0.26093	0.0097701	-0.275583	0.0548801	-0.332849	0.10626	-0.309889	0.18182		111111	0	0	0	111111	male-cM/Mb	A
	ave-cM/Mb	-0.183584	0.0678001	-0.194329	0.17682	-0.218365	0.29493	-0.154639	0.51296		0	0	0	0	0	ave-cM/Mb	A
13-23	f(B6xCAST)-cM	-0.146568	0.12664	-0.250342	0.0748901	-0.277764	0.15121	-0.39947	0.0864601		0	0	0	0	0	f(B6xCAST)-cM	B
	f(CASTxB6)-cM	-0.179677	0.0632301	-0.292226	0.0427501	-0.327075	0.1047	-0.488513	0.0313201		0	111111	0	111111	222222	f(CASTxB6)-cM	B
	m(B6xCAST)-cM	0.0230641	0.81525	0.0666621	0.63827	0.121738	0.52646	0.0815011	0.68535		0	0	0	0	0	m(B6xCAST)-cM	B
	m(CASTxB6)-cM	-0.0555941	0.57604	-0.0548291	0.69567	0.0084321	0.96399	-0.0908721	0.63806		0	0	0	0	0	m(CASTxB6)-cM	B
	female-cM	-0.164857	0.0886501	-0.274242	0.0552001	-0.307113	0.11889	-0.451714	0.0504101		0	0	0	0	0	female-cM	B
	male-cM	-0.0112251	0.90851	0.0120791	0.93134	0.0743341	0.69648	0.0041361	0.98235		0	0	0	0	0	male-cM	B
	ave-cM	-0.105138	0.28358	-0.155807	0.26778	-0.124377	0.52824	-0.241481	0.30343		0	0	0	0	0	ave-cM	B
13-23	f(B6xCAST)-cM/Mb	-0.146568	0.1285	-0.250342	0.0757301	-0.277764	0.15034	-0.39947	0.0838801		0	0	0	0	0	f(B6xCAST)-cM/Mb	B
	f(CASTxB6)-cM/Mb	-0.179677	0.0621501	-0.292226	0.0425201	-0.327075	0.10492	-0.488513	0.0321001		0	111111	0	111111	222222	f(CASTxB6)-cM/Mb	B
	m(B6xCAST)-cM/Mb	0.0230641	0.81447	0.0666631	0.6358	0.121738	0.52738	0.0815011	0.68391		0	0	0	0	0	m(B6xCAST)-cM/Mb	B
	m(CASTxB6)-cM/Mb	-0.0555941	0.57322	-0.0548291	0.69349	0.0084321	0.96454	-0.0908721	0.63965		0	0	0	0	0	m(CASTxB6)-cM/Mb	B
	female-cM/Mb	-0.164856	0.0877301	-0.274242	0.0556901	-0.307113	0.12012	-0.451714	0.0497001		0	0	0	111111	111111	female-cM/Mb	B
	male-cM/Mb	-0.0112251	0.90937	0.0120791	0.93122	0.0743341	0.69655	0.0041361	0.98241		0	0	0	0	0	male-cM/Mb	B
	ave-cM/Mb	-0.105138	0.28375	-0.155808	0.26846	-0.124377	0.52577	-0.241481	0.30467		0	0	0	0	0	ave-cM/Mb	B
23-33	f(B6xCAST)-cM	-0.16153	0.10433	-0.203638	0.15323	-0.400665	0.0443701	-0.433168	0.0538001		0	0	111111	0	111111	f(B6xCAST)-cM	C
	f(CASTxB6)-cM	-0.117286	0.24482	-0.147441	0.30468	-0.249077	0.21741	-0.245906	0.28841		0	0	0	0	0	f(CASTxB6)-cM	C
	m(B6xCAST)-cM	-0.0241971	0.81481	-0.121626	0.3939	-0.236365	0.2466	-0.178455	0.44454		0	0	0	0	0	m(B6xCAST)-cM	C
	m(CASTxB6)-cM	-0.0509081	0.61329	-0.0514781	0.71863	-0.221938	0.27734	-0.163735	0.48636		0	0	0	0	0	m(CASTxB6)-cM	C
	female-cM	-0.145397	0.14277	-0.182556	0.20442	-0.32731	0.10482	-0.340721	0.13092		0	0	0	0	0	female-cM	C
	male-cM	-0.0402151	0.69185	-0.0930471	0.51511	-0.243224	0.23655	-0.181045	0.43739		0	0	0	0	0	male-cM	C
	ave-cM	-0.106917	0.29162	-0.155377	0.27691	-0.322642	0.10768	-0.299084	0.19406		0	0	0	0	0	ave-cM	C
23-33	f(B6xCAST)-cM/Mb	-0.16153	0.10489	-0.203638	0.15291	-0.400665	0.0433401	-0.433168	0.0536101		0	0	111111	0	111111	f(B6xCAST)-cM/Mb	C
	f(CASTxB6)-cM/Mb	-0.117286	0.24425	-0.147441	0.30548	-0.249077	0.21691	-0.245905	0.28587		0	0	0	0	0	f(CASTxB6)-cM/Mb	C
	m(B6xCAST)-cM/Mb	-0.0241971	0.81322	-0.121626	0.39675	-0.236365	0.25078	-0.178455	0.443		0	0	0	0	0	m(B6xCAST)-cM/Mb	C
	m(CASTxB6)-cM/Mb	-0.0509081	0.61679	-0.0514791	0.72372	-0.221938	0.28027	-0.163735	0.48752		0	0	0	0	0	m(CASTxB6)-cM/Mb	C
	female-cM/Mb	-0.145397	0.14281	-0.182557	0.2033	-0.32731	0.10448	-0.340721	0.13289		0	0	0	0	0	female-cM/Mb	C
	male-cM/Mb	-0.0402151	0.6933	-0.0930471	0.51479	-0.243224	0.23472	-0.181045	0.43633		0	0	0	0	0	male-cM/Mb	C
	ave-cM/Mb	-0.106916	0.28956	-0.155377	0.27692	-0.322641	0.10657	-0.299084	0.19203		0	0	0	0	0	ave-cM/Mb	C
33-43	f(B6xCAST)-cM	-0.0955781	0.3453	-0.0410331	0.77483	-0.190876	0.36291	-0.247939	0.29229		0	0	0	0	0	f(B6xCAST)-cM	D
	f(CASTxB6)-cM	-0.173456	0.0790201	-0.174241	0.22372	-0.375582	0.0649201	-0.433564	0.0560601		0	0	0	0	0	f(CASTxB6)-cM	D
	m(B6xCAST)-cM	-0.201873	0.0391801	-0.128238	0.36756	-0.248145	0.23208	-0.337011	0.14316		111111	0	0	0	111111	m(B6xCAST)-cM	D
	m(CASTxB6)-cM	-0.187786	0.0585701	-0.169564	0.23627	-0.360973	0.0766901	-0.424162	0.0606801		0	0	0	0	0	m(CASTxB6)-cM	D
	female-cM	-0.137572	0.16944	-0.108024	0.45158	-0.288423	0.16317	-0.347279	0.13337		0	0	0	0	0	female-cM	D
	male-cM	-0.204519	0.0382801	-0.156626	0.27103	-0.319698	0.11858	-0.39631	0.0807901		111111	0	0	0	111111	male-cM	D
	ave-cM	-0.172632	0.0806101	-0.134146	0.34823	-0.313344	0.12631	-0.384373	0.0913701		0	0	0	0	0	ave-cM	D
33-43	f(B6xCAST)-cM/Mb	-0.0955781	0.34366	-0.0410331	0.77506	-0.190876	0.36205	-0.247939	0.29177		0	0	0	0	0	f(B6xCAST)-cM/Mb	D
	f(CASTxB6)-cM/Mb	-0.173456	0.0797101	-0.174241	0.22335	-0.375582	0.0633801	-0.433564	0.0564401		0	0	0	0	0	f(CASTxB6)-cM/Mb	D
	m(B6xCAST)-cM/Mb	-0.201873	0.0397601	-0.128238	0.36672	-0.248145	0.23342	-0.337011	0.14537		111111	0	0	0	111111	m(B6xCAST)-cM/Mb	D
	m(CASTxB6)-cM/Mb	-0.187786	0.0577401	-0.169564	0.23604	-0.360974	0.0751401	-0.424162	0.0622901		0	0	0	0	0	m(CASTxB6)-cM/Mb	D
	female-cM/Mb	-0.137572	0.16882	-0.108024	0.4525	-0.288423	0.16291	-0.347279	0.1332		0	0	0	0	0	female-cM/Mb	D
	male-cM/Mb	-0.20452	0.0370901	-0.156627	0.27318	-0.319698	0.11788	-0.39631	0.0816401		111111	0	0	0	111111	male-cM/Mb	D
	ave-cM/Mb	-0.172631	0.0821601	-0.134146	0.34703	-0.313344	0.12534	-0.384373	0.0931001		0	0	0	0	0	ave-cM/Mb	D
43-53	f(B6xCAST)-cM	-0.166918	0.0934201	-0.340444	0.0162801	-0.363584	0.0720701	-0.351541	0.13296		0	111111	0	0	111111	f(B6xCAST)-cM	E
	f(CASTxB6)-cM	-0.0344571	0.7318	-0.195101	0.1744	-0.118315	0.56723	-0.150011	0.54076		0	0	0	0	0	f(CASTxB6)-cM	E
	m(B6xCAST)-cM	0.0069881	0.94437	-0.0431631	0.75982	0.0027051	0.9893	-0.112606	0.596		0	0	0	0	0	m(B6xCAST)-cM	E
	m(CASTxB6)-cM	-0.0279041	0.78017	-0.115316	0.41975	-0.0805861	0.68048	-0.19137	0.38711		0	0	0	0	0	m(CASTxB6)-cM	E
	female-cM	-0.107108	0.28581	-0.291303	0.0399501	-0.252885	0.22139	-0.270748	0.25028		0	111111	0	0	111111	female-cM	E
	male-cM	-0.0113881	0.91106	-0.0817011	0.56834	-0.0417601	0.83165	-0.154894	0.47072		0	0	0	0	0	male-cM	E
	ave-cM	-0.0469941	0.63937	-0.161566	0.26038	-0.118421	0.55693	-0.204304	0.35187		0	0	0	0	0	ave-cM	E
43-53	f(B6xCAST)-cM/Mb	-0.166918	0.0951701	-0.340444	0.0151601	-0.363584	0.0742701	-0.351541	0.13183		0	111111	0	0	111111	f(B6xCAST)-cM/Mb	E
	f(CASTxB6)-cM/Mb	-0.0344571	0.73142	-0.1951	0.1716	-0.118315	0.56696	-0.150011	0.54176		0	0	0	0	0	f(CASTxB6)-cM/Mb	E
	m(B6xCAST)-cM/Mb	0.0069881	0.94583	-0.0431631	0.76346	0.0027051	0.9897	-0.112606	0.59292		0	0	0	0	0	m(B6xCAST)-cM/Mb	E
	m(CASTxB6)-cM/Mb	-0.0279041	0.78183	-0.115316	0.42159	-0.0805861	0.6848	-0.19137	0.38723		0	0	0	0	0	m(CASTxB6)-cM/Mb	E
	female-cM/Mb	-0.107108	0.28716	-0.291303	0.0394101	-0.252885	0.22129	-0.270749	0.24894		0	111111	0	0	111111	female-cM/Mb	E
	male-cM/Mb	-0.0113881	0.9097	-0.0817011	0.56968	-0.0417601	0.83103	-0.154894	0.47265		0	0	0	0	0	male-cM/Mb	E
	ave-cM/Mb	-0.0469941	0.63846	-0.161566	0.25795	-0.11842	0.55632	-0.204304	0.35686		0	0	0	0	0	ave-cM/Mb	E
53-63	f(B6xCAST)-cM	-0.0565731	0.56622	-0.100013	0.48858	-0.0086861	0.96584	0.0645511	0.78589		0	0	0	0	0	f(B6xCAST)-cM	F
	f(CASTxB6)-cM	-0.0807561	0.3648	-0.15999	0.25881	-0.0017891	0.99305	-0.0024951	0.99139		0	0	0	0	0	f(CASTxB6)-cM	F
	m(B6xCAST)-cM	-0.0414821	0.65851	-0.0877831	0.54711	0.0553741	0.79861	0.15408	0.50865		0	0	0	0	0	m(B6xCAST)-cM	F
	m(CASTxB6)-cM	-0.0386601	0.6898	-0.0501401	0.73176	0.0071741	0.97282	0.206896	0.3799		0	0	0	0	0	m(CASTxB6)-cM	F
	female-cM	-0.0760291	0.40879	-0.141676	0.31951	-0.0052551	0.98036	0.0307921	0.89854		0	0	0	0	0	female-cM	F
	male-cM	-0.0406951	0.67259	-0.0668001	0.6482	0.0269741	0.90112	0.18904	0.42086		0	0	0	0	0	male-cM	F
	ave-cM	-0.0560021	0.55849	-0.0988091	0.49655	0.0210361	0.92281	0.175472	0.45821		0	0	0	0	0	ave-cM	F
53-63	f(B6xCAST)-cM/Mb	-0.0565731	0.5654	-0.100013	0.48313	-0.0086851	0.96638	0.0645501	0.78272		0	0	0	0	0	f(B6xCAST)-cM/Mb	F
	f(CASTxB6)-cM/Mb	-0.0807561	0.36471	-0.159989	0.26122	-0.0017891	0.99307	-0.0024951	0.99137		0	0	0	0	0	f(CASTxB6)-cM/Mb	F
	m(B6xCAST)-cM/Mb	-0.0414821	0.6581	-0.0877831	0.54922	0.0553741	0.79701	0.15408	0.50742		0	0	0	0	0	m(B6xCAST)-cM/Mb	F
	m(CASTxB6)-cM/Mb	-0.0386601	0.69067	-0.0501401	0.73509	0.0071741	0.97334	0.206896	0.38208		0	0	0	0	0	m(CASTxB6)-cM/Mb	F
	female-cM/Mb	-0.0760291	0.40511	-0.141676	0.32011	-0.0052561	0.98029	0.0307921	0.89563		0	0	0	0	0	female-cM/Mb	F
	male-cM/Mb	-0.0406951	0.66796	-0.0668001	0.65064	0.0269741	0.89959	0.18904	0.41746		0	0	0	0	0	male-cM/Mb	F
	ave-cM/Mb	-0.0560021	0.5575	-0.0988091	0.49547	0.0210361	0.92197	0.175473	0.45668		0	0	0	0	0	ave-cM/Mb	F
63-73	f(B6xCAST)-cM	3.91e-05	0.99966	-0.0499531	0.73308	-0.0542531	0.80028	-0.0975981	0.68185		0	0	0	0	0	f(B6xCAST)-cM	G
	f(CASTxB6)-cM	0.0542161	0.58508	0.0054311	0.9703	-0.0335401	0.87322	-0.0795651	0.73152		0	0	0	0	0	f(CASTxB6)-cM	G
	m(B6xCAST)-cM	-0.0256551	0.79836	-0.112845	0.44015	-0.0892091	0.67035	-0.183031	0.42604		0	0	0	0	0	m(B6xCAST)-cM	G
	m(CASTxB6)-cM	0.106738	0.28393	0.0544861	0.71023	0.0507711	0.81091	-0.112138	0.64298		0	0	0	0	0	m(CASTxB6)-cM	G
	female-cM	0.0289091	0.77438	-0.0249321	0.86149	-0.0475581	0.82264	-0.0960451	0.68238		0	0	0	0	0	female-cM	G
	male-cM	0.0381541	0.70541	-0.0394951	0.78807	-0.0254811	0.90462	-0.161201	0.49055		0	0	0	0	0	male-cM	G
	ave-cM	0.0352431	0.72225	-0.0327951	0.8224	-0.0413141	0.84397	-0.13043	0.57748		0	0	0	0	0	ave-cM	G
63-73	f(B6xCAST)-cM/Mb	3.91e-05	0.99964	-0.0499531	0.72816	-0.0542531	0.79853	-0.0975981	0.6823		0	0	0	0	0	f(B6xCAST)-cM/Mb	G
	f(CASTxB6)-cM/Mb	0.0542161	0.58828	0.0054301	0.97034	-0.0335401	0.87382	-0.0795651	0.73374		0	0	0	0	0	f(CASTxB6)-cM/Mb	G
	m(B6xCAST)-cM/Mb	-0.0256561	0.7992	-0.112845	0.4408	-0.0892091	0.6733	-0.183031	0.42925		0	0	0	0	0	m(B6xCAST)-cM/Mb	G
	m(CASTxB6)-cM/Mb	0.106738	0.28709	0.0544861	0.70601	0.0507711	0.811	-0.112138	0.64255		0	0	0	0	0	m(CASTxB6)-cM/Mb	G
	female-cM/Mb	0.0289091	0.77182	-0.0249321	0.86309	-0.0475581	0.82382	-0.0960451	0.68297		0	0	0	0	0	female-cM/Mb	G
	male-cM/Mb	0.0381541	0.70387	-0.0394951	0.78802	-0.0254811	0.90302	-0.161201	0.48913		0	0	0	0	0	male-cM/Mb	G
	ave-cM/Mb	0.0352421	0.72496	-0.0327941	0.819	-0.0413141	0.84619	-0.13043	0.57735		0	0	0	0	0	ave-cM/Mb	G
73-83	f(B6xCAST)-cM	-0.15149	0.0924001	-0.12268	0.32939	-0.0854371	0.66879	0.0206081	0.93212		0	0	0	0	0	f(B6xCAST)-cM	H
	f(CASTxB6)-cM	-0.108756	0.2737	-0.0977531	0.48558	-0.0403601	0.84308	0.0453641	0.85023		0	0	0	0	0	f(CASTxB6)-cM	H
	m(B6xCAST)-cM	-0.131565	0.15567	-0.12601	0.34244	-0.112567	0.58427	-0.183294	0.427		0	0	0	0	0	m(B6xCAST)-cM	H
	m(CASTxB6)-cM	-0.167312	0.0746401	-0.191529	0.13633	-0.246554	0.21415	-0.322111	0.16533		0	0	0	0	0	m(CASTxB6)-cM	H
	female-cM	-0.147135	0.11452	-0.122579	0.35444	-0.0667351	0.7418	0.0343341	0.89056		0	0	0	0	0	female-cM	H
	male-cM	-0.154077	0.0953401	-0.16293	0.20665	-0.181021	0.37085	-0.263131	0.25629		0	0	0	0	0	male-cM	H
	ave-cM	-0.177553	0.0706401	-0.1657	0.23521	-0.134523	0.52117	-0.104437	0.66993		0	0	0	0	0	ave-cM	H
73-83	f(B6xCAST)-cM/Mb	-0.15149	0.0914301	-0.12268	0.33239	-0.0854371	0.67227	0.0206071	0.93249		0	0	0	0	0	f(B6xCAST)-cM/Mb	H
	f(CASTxB6)-cM/Mb	-0.108756	0.27674	-0.0977531	0.48613	-0.0403601	0.84311	0.0453641	0.85169		0	0	0	0	0	f(CASTxB6)-cM/Mb	H
	m(B6xCAST)-cM/Mb	-0.131565	0.15704	-0.12601	0.34286	-0.112567	0.58461	-0.183294	0.42823		0	0	0	0	0	m(B6xCAST)-cM/Mb	H
	m(CASTxB6)-cM/Mb	-0.167313	0.0763101	-0.191529	0.13713	-0.246554	0.21376	-0.322111	0.16733		0	0	0	0	0	m(CASTxB6)-cM/Mb	H
	female-cM/Mb	-0.147135	0.11391	-0.122579	0.35429	-0.0667351	0.73751	0.0343351	0.88771		0	0	0	0	0	female-cM/Mb	H
	male-cM/Mb	-0.154076	0.0952601	-0.16293	0.20637	-0.181021	0.37181	-0.263131	0.25608		0	0	0	0	0	male-cM/Mb	H
	ave-cM/Mb	-0.177553	0.0698301	-0.1657	0.23463	-0.134523	0.51977	-0.104437	0.66871		0	0	0	0	0	ave-cM/Mb	H
83-93	f(B6xCAST)-cM	-0.0110521	0.90609	-0.0381171	0.79356	-0.0361391	0.86398	-0.0672291	0.77992		0	0	0	0	0	f(B6xCAST)-cM	I
	f(CASTxB6)-cM	-0.0079911	0.93041	-0.0369711	0.7983	0.0508831	0.80785	0.0249951	0.90674		0	0	0	0	0	f(CASTxB6)-cM	I
	m(B6xCAST)-cM	0.0570881	0.55512	0.0772931	0.58734	-0.0779291	0.70975	0.0671981	0.78395		0	0	0	0	0	m(B6xCAST)-cM	I
	m(CASTxB6)-cM	0.0103031	0.90624	0.0254001	0.85056	0.0036171	0.98557	0.105181	0.61013		0	0	0	0	0	m(CASTxB6)-cM	I
	female-cM	-0.0098251	0.91366	-0.0390441	0.78623	0.0080841	0.96926	-0.0168271	0.9413		0	0	0	0	0	female-cM	I
	male-cM	0.0264551	0.77227	0.0458841	0.74285	-0.0261841	0.89569	0.0971831	0.65961		0	0	0	0	0	male-cM	I
	ave-cM	0.0052821	0.95323	-0.0047881	0.973	-0.0054271	0.97964	0.0299211	0.89207		0	0	0	0	0	ave-cM	I
83-93	f(B6xCAST)-cM/Mb	-0.0110521	0.90695	-0.0381171	0.79561	-0.0361391	0.86479	-0.0672291	0.78077		0	0	0	0	0	f(B6xCAST)-cM/Mb	I
	f(CASTxB6)-cM/Mb	-0.0079911	0.93021	-0.0369711	0.79821	0.0508831	0.80841	0.0249951	0.9059		0	0	0	0	0	f(CASTxB6)-cM/Mb	I
	m(B6xCAST)-cM/Mb	0.0570881	0.55458	0.0772931	0.59131	-0.0779291	0.70799	0.0671981	0.78159		0	0	0	0	0	m(B6xCAST)-cM/Mb	I
	m(CASTxB6)-cM/Mb	0.0103031	0.90546	0.0254001	0.85268	0.0036171	0.98505	0.105181	0.61115		0	0	0	0	0	m(CASTxB6)-cM/Mb	I
	female-cM/Mb	-0.0098251	0.9147	-0.0390441	0.78328	0.0080841	0.96888	-0.0168271	0.94179		0	0	0	0	0	female-cM/Mb	I
	male-cM/Mb	0.0264551	0.76898	0.0458841	0.74339	-0.0261841	0.89811	0.0971831	0.66054		0	0	0	0	0	male-cM/Mb	I
	ave-cM/Mb	0.0052821	0.95435	-0.0047881	0.97396	-0.0054271	0.97824	0.0299211	0.89366		0	0	0	0	0	ave-cM/Mb	I
93-103	f(B6xCAST)-cM	0.0568291	0.57164	0.142949	0.32493	0.136452	0.50743	0.291434	0.20938		0	0	0	0	0	f(B6xCAST)-cM	J
	f(CASTxB6)-cM	0.0729221	0.46424	0.0854771	0.55559	0.0617321	0.77083	0.309098	0.18429		0	0	0	0	0	f(CASTxB6)-cM	J
	m(B6xCAST)-cM	0.0323911	0.74737	0.0729271	0.61446	-0.1041	0.6177	-0.131601	0.57655		0	0	0	0	0	m(B6xCAST)-cM	J
	m(CASTxB6)-cM	0.0143651	0.88799	0.0513711	0.72633	-0.110892	0.59923	-0.157588	0.51185		0	0	0	0	0	m(CASTxB6)-cM	J
	female-cM	0.0694081	0.49035	0.121374	0.40204	0.110433	0.60041	0.310981	0.17816		0	0	0	0	0	female-cM	J
	male-cM	0.0239491	0.81376	0.0648151	0.65579	-0.115345	0.58711	-0.156957	0.51005		0	0	0	0	0	male-cM	J
	ave-cM	0.0508061	0.61118	0.108325	0.45636	-0.0024761	0.99055	0.0939531	0.69663		0	0	0	0	0	ave-cM	J
93-103	f(B6xCAST)-cM/Mb	0.0568301	0.57166	0.142948	0.32132	0.136451	0.51064	0.291434	0.20802		0	0	0	0	0	f(B6xCAST)-cM/Mb	J
	f(CASTxB6)-cM/Mb	0.0729221	0.46289	0.0854771	0.55513	0.0617311	0.77262	0.309098	0.18275		0	0	0	0	0	f(CASTxB6)-cM/Mb	J
	m(B6xCAST)-cM/Mb	0.0323911	0.74486	0.0729271	0.61723	-0.104099	0.62333	-0.131602	0.57934		0	0	0	0	0	m(B6xCAST)-cM/Mb	J
	m(CASTxB6)-cM/Mb	0.0143651	0.8872	0.0513711	0.72758	-0.110892	0.60121	-0.157588	0.51152		0	0	0	0	0	m(CASTxB6)-cM/Mb	J
	female-cM/Mb	0.0694091	0.48764	0.121374	0.4024	0.110432	0.59804	0.310981	0.1805		0	0	0	0	0	female-cM/Mb	J
	male-cM/Mb	0.0239491	0.81183	0.0648151	0.65836	-0.115345	0.58568	-0.156957	0.51621		0	0	0	0	0	male-cM/Mb	J
	ave-cM/Mb	0.0508061	0.61162	0.108325	0.45601	-0.0024761	0.99088	0.0939521	0.69685		0	0	0	0	0	ave-cM/Mb	J
103-113	f(B6xCAST)-cM	-0.0045081	0.96381	0.0303781	0.82043	-0.0644591	0.77593	-0.0420321	0.86442		0	0	0	0	0	f(B6xCAST)-cM	K
	f(CASTxB6)-cM	0.0160401	0.87061	0.0081201	0.95276	-0.103594	0.64835	-0.0395401	0.84431		0	0	0	0	0	f(CASTxB6)-cM	K
	m(B6xCAST)-cM	-0.0143781	0.88429	0.0409461	0.76768	-0.0968201	0.65456	-0.0022621	0.99332		0	0	0	0	0	m(B6xCAST)-cM	K
	m(CASTxB6)-cM	-0.0397661	0.68294	-0.0210921	0.87484	-0.182431	0.38731	-0.125798	0.61174		0	0	0	0	0	m(CASTxB6)-cM	K
	female-cM	0.0069291	0.94358	0.0197361	0.88568	-0.0895191	0.69529	-0.0417361	0.85149		0	0	0	0	0	female-cM	K
	male-cM	-0.0290461	0.76767	0.0086491	0.94671	-0.147922	0.48767	-0.0756471	0.75844		0	0	0	0	0	male-cM	K
	ave-cM	-0.0144531	0.88331	0.0145581	0.91871	-0.130167	0.54622	-0.0632221	0.79743		0	0	0	0	0	ave-cM	K
103-113	f(B6xCAST)-cM/Mb	-0.0045081	0.96379	0.0303781	0.82243	-0.0644591	0.77695	-0.0420321	0.86541		0	0	0	0	0	f(B6xCAST)-cM/Mb	K
	f(CASTxB6)-cM/Mb	0.0160401	0.87256	0.0081201	0.95148	-0.103594	0.64457	-0.0395401	0.84926		0	0	0	0	0	f(CASTxB6)-cM/Mb	K
	m(B6xCAST)-cM/Mb	-0.0143781	0.88382	0.0409461	0.76972	-0.0968201	0.65713	-0.0022621	0.99272		0	0	0	0	0	m(B6xCAST)-cM/Mb	K
	m(CASTxB6)-cM/Mb	-0.0397661	0.68435	-0.0210921	0.87489	-0.182431	0.38749	-0.125798	0.61758		0	0	0	0	0	m(CASTxB6)-cM/Mb	K
	female-cM/Mb	0.0069291	0.94367	0.0197361	0.88647	-0.0895181	0.69153	-0.0417361	0.85125		0	0	0	0	0	female-cM/Mb	K
	male-cM/Mb	-0.0290461	0.76512	0.0086491	0.94927	-0.147922	0.4884	-0.0756471	0.75726		0	0	0	0	0	male-cM/Mb	K
	ave-cM/Mb	-0.0144531	0.88234	0.0145581	0.91664	-0.130167	0.54768	-0.0632211	0.7982		0	0	0	0	0	ave-cM/Mb	K
113-121.7	f(B6xCAST)-cM	0.0039891	0.96978	-0.0579151	0.69975	0.0756501	0.7369	0.175363	0.48061		0	0	0	0	0	f(B6xCAST)-cM	L
	f(CASTxB6)-cM	0.0317001	0.7687	0.0787821	0.60244	0.267281	0.22631	0.288729	0.2489		0	0	0	0	0	f(CASTxB6)-cM	L
	m(B6xCAST)-cM	0.0632301	0.55833	0.131436	0.39729	0.264582	0.24077	0.0201631	0.93728		0	0	0	0	0	m(B6xCAST)-cM	L
	m(CASTxB6)-cM	0.106865	0.3213	0.10225	0.50382	0.327606	0.13583	0.284673	0.25106		0	0	0	0	0	m(CASTxB6)-cM	L
	female-cM	0.0190231	0.85956	0.0142231	0.92598	0.183386	0.40869	0.24847	0.31871		0	0	0	0	0	female-cM	L
	male-cM	0.0873461	0.41987	0.122315	0.42941	0.309362	0.16446	0.157629	0.53534		0	0	0	0	0	male-cM	L
	ave-cM	0.0668241	0.53584	0.0879251	0.56893	0.277078	0.2141	0.193153	0.44416		0	0	0	0	0	ave-cM	L
113-121.7	f(B6xCAST)-cM/Mb	0.0039891	0.97055	-0.0579151	0.70162	0.0756501	0.73695	0.175363	0.47985		0	0	0	0	0	f(B6xCAST)-cM/Mb	L
	f(CASTxB6)-cM/Mb	0.0317011	0.7701	0.0787811	0.6018	0.267282	0.22778	0.28873	0.24696		0	0	0	0	0	f(CASTxB6)-cM/Mb	L
	m(B6xCAST)-cM/Mb	0.0632301	0.5589	0.131436	0.39659	0.264582	0.24137	0.0201631	0.93596		0	0	0	0	0	m(B6xCAST)-cM/Mb	L
	m(CASTxB6)-cM/Mb	0.106865	0.32528	0.102251	0.50379	0.327606	0.13819	0.284673	0.25503		0	0	0	0	0	m(CASTxB6)-cM/Mb	L
	female-cM/Mb	0.0190231	0.85872	0.0142231	0.92606	0.183386	0.40811	0.24847	0.31683		0	0	0	0	0	female-cM/Mb	L
	male-cM/Mb	0.0873461	0.41897	0.122315	0.42909	0.309362	0.16517	0.157629	0.53485		0	0	0	0	0	male-cM/Mb	L
	ave-cM/Mb	0.0668241	0.5358	0.0879251	0.56939	0.277078	0.2132	0.193153	0.44359		0	0	0	0	0	ave-cM/Mb	L
3-11.7	f(B6xCAST)-cM	-0.108862	0.30904	-0.115399	0.45516	-0.0778091	0.72351	-0.0854441	0.73208		0	0	0	0	0	f(B6xCAST)-cM	o
	f(CASTxB6)-cM	-0.0971641	0.36658	-0.0816371	0.59797	-0.0621961	0.77059	-0.0451511	0.85907		0	0	0	0	0	f(CASTxB6)-cM	o
	m(B6xCAST)-cM	-0.147284	0.17298	-0.160964	0.2898	-0.241706	0.28249	-0.179538	0.48146		0	0	0	0	0	m(B6xCAST)-cM	o
	m(CASTxB6)-cM	-0.202859	0.0587801	-0.235608	0.12271	-0.254388	0.25825	-0.347971	0.15325		0	0	0	0	0	m(CASTxB6)-cM	o
	female-cM	-0.105876	0.32319	-0.0991101	0.52084	-0.0708341	0.74146	-0.0659121	0.79587		0	0	0	0	0	female-cM	o
	male-cM	-0.191679	0.0746401	-0.204101	0.17875	-0.26046	0.24732	-0.290247	0.24382		0	0	0	0	0	male-cM	o
	ave-cM	-0.143275	0.18056	-0.146245	0.34337	-0.138044	0.53501	-0.139443	0.57935		0	0	0	0	0	ave-cM	o
3-11.7	f(B6xCAST)-cM/Mb	-0.108862	0.30917	-0.115398	0.45509	-0.0778091	0.72605	-0.0854431	0.73235		0	0	0	0	0	f(B6xCAST)-cM/Mb	o
	f(CASTxB6)-cM/Mb	-0.0971631	0.36631	-0.0816371	0.59879	-0.0621961	0.76872	-0.0451511	0.85843		0	0	0	0	0	f(CASTxB6)-cM/Mb	o
	m(B6xCAST)-cM/Mb	-0.147284	0.17302	-0.160964	0.29045	-0.241707	0.28097	-0.179537	0.48615		0	0	0	0	0	m(B6xCAST)-cM/Mb	o
	m(CASTxB6)-cM/Mb	-0.202859	0.0571801	-0.235607	0.12173	-0.254387	0.25951	-0.347971	0.15427		0	0	0	0	0	m(CASTxB6)-cM/Mb	o
	female-cM/Mb	-0.105877	0.32402	-0.0991111	0.5219	-0.0708341	0.74098	-0.0659121	0.79219		0	0	0	0	0	female-cM/Mb	o
	male-cM/Mb	-0.191679	0.0736501	-0.204101	0.17934	-0.26046	0.24766	-0.290247	0.24273		0	0	0	0	0	male-cM/Mb	o
	ave-cM/Mb	-0.143275	0.18233	-0.146245	0.34362	-0.138044	0.53573	-0.139443	0.57894		0	0	0	0	0	ave-cM/Mb	o
11.7-21.7	f(B6xCAST)-cM	-0.190738	0.0565601	-0.297011	0.0456601	-0.444145	0.0210901	-0.376634	0.0905601		0	111111	111111	0	222222	f(B6xCAST)-cM	p
	f(CASTxB6)-cM	-0.189078	0.0577501	-0.308145	0.0351201	-0.44375	0.0225501	-0.4587	0.0541601		0	111111	111111	0	222222	f(CASTxB6)-cM	p
	m(B6xCAST)-cM	-0.0192271	0.84531	-0.0086491	0.95027	0.0538551	0.80665	-0.0173751	0.92034		0	0	0	0	0	m(B6xCAST)-cM	p
	m(CASTxB6)-cM	-0.0952401	0.34483	-0.0928841	0.50384	-0.0194561	0.93285	-0.0783871	0.66752		0	0	0	0	0	m(CASTxB6)-cM	p
	female-cM	-0.191127	0.0561001	-0.305221	0.0382201	-0.448521	0.0196601	-0.424586	0.0694701		0	111111	111111	0	222222	female-cM	p
	male-cM	-0.0538291	0.58822	-0.0480581	0.72823	0.0216931	0.9213	-0.0457631	0.79212		0	0	0	0	0	male-cM	p
	ave-cM	-0.145754	0.14545	-0.209954	0.1409	-0.236078	0.25986	-0.258741	0.24981		0	0	0	0	0	ave-cM	p
11.7-21.7	f(B6xCAST)-cM/Mb	-0.190738	0.0577601	-0.297011	0.0444201	-0.444145	0.0217901	-0.376634	0.0923701		0	111111	111111	0	222222	f(B6xCAST)-cM/Mb	p
	f(CASTxB6)-cM/Mb	-0.189078	0.0568901	-0.308145	0.0355801	-0.44375	0.0215101	-0.4587	0.0523801		0	111111	111111	0	222222	f(CASTxB6)-cM/Mb	p
	m(B6xCAST)-cM/Mb	-0.0192271	0.84402	-0.0086481	0.95016	0.0538551	0.80339	-0.0173751	0.9203		0	0	0	0	0	m(B6xCAST)-cM/Mb	p
	m(CASTxB6)-cM/Mb	-0.0952401	0.34357	-0.0928841	0.5023	-0.0194561	0.9321	-0.0783871	0.66856		0	0	0	0	0	m(CASTxB6)-cM/Mb	p
	female-cM/Mb	-0.191127	0.0540001	-0.305221	0.0391301	-0.448521	0.0189101	-0.424587	0.0695901		0	111111	111111	0	222222	female-cM/Mb	p
	male-cM/Mb	-0.0538291	0.58838	-0.0480581	0.72569	0.0216931	0.92245	-0.0457621	0.79182		0	0	0	0	0	male-cM/Mb	p
	ave-cM/Mb	-0.145754	0.14375	-0.209955	0.13873	-0.236078	0.26063	-0.258741	0.25089		0	0	0	0	0	ave-cM/Mb	p
21.7-31.7	f(B6xCAST)-cM	-0.154501	0.12243	-0.200704	0.16067	-0.37396	0.0601901	-0.48665	0.0253301		0	0	0	111111	111111	f(B6xCAST)-cM	q
	f(CASTxB6)-cM	-0.150691	0.12828	-0.155154	0.28625	-0.253965	0.22107	-0.281378	0.2317		0	0	0	0	0	f(CASTxB6)-cM	q
	m(B6xCAST)-cM	-0.0010791	0.99142	-0.0242471	0.871	-0.0811821	0.71341	0.0532111	0.82868		0	0	0	0	0	m(B6xCAST)-cM	q
	m(CASTxB6)-cM	-0.0518891	0.617	-0.0446891	0.76342	-0.214203	0.30609	-0.161637	0.51838		0	0	0	0	0	m(CASTxB6)-cM	q
	female-cM	-0.160074	0.10699	-0.185321	0.19845	-0.317245	0.11603	-0.386901	0.0808601		0	0	0	0	0	female-cM	q
	male-cM	-0.0281761	0.78374	-0.0377061	0.79751	-0.158076	0.45947	-0.0481901	0.8383		0	0	0	0	0	male-cM	q
	ave-cM	-0.114781	0.26184	-0.137028	0.34554	-0.287323	0.15809	-0.288265	0.21971		0	0	0	0	0	ave-cM	q
21.7-31.7	f(B6xCAST)-cM/Mb	-0.1545	0.1235	-0.200704	0.1596	-0.37396	0.0597401	-0.48665	0.0246001		0	0	0	111111	111111	f(B6xCAST)-cM/Mb	q
	f(CASTxB6)-cM/Mb	-0.150691	0.12831	-0.155154	0.28459	-0.253965	0.22311	-0.281378	0.23221		0	0	0	0	0	f(CASTxB6)-cM/Mb	q
	m(B6xCAST)-cM/Mb	-0.0010791	0.99182	-0.0242471	0.86945	-0.0811821	0.71438	0.0532111	0.82642		0	0	0	0	0	m(B6xCAST)-cM/Mb	q
	m(CASTxB6)-cM/Mb	-0.0518901	0.61733	-0.0446901	0.76146	-0.214204	0.30494	-0.161637	0.51411		0	0	0	0	0	m(CASTxB6)-cM/Mb	q
	female-cM/Mb	-0.160075	0.10684	-0.185321	0.19901	-0.317245	0.11658	-0.386901	0.0810401		0	0	0	0	0	female-cM/Mb	q
	male-cM/Mb	-0.0281751	0.78522	-0.0377061	0.79928	-0.158076	0.46301	-0.0481901	0.83793		0	0	0	0	0	male-cM/Mb	q
	ave-cM/Mb	-0.11478	0.25683	-0.137027	0.34387	-0.287324	0.16131	-0.288265	0.22009		0	0	0	0	0	ave-cM/Mb	q
31.7-41.7	f(B6xCAST)-cM	-0.0857171	0.40355	-0.0533921	0.72084	-0.183277	0.38832	-0.20767	0.3822		0	0	0	0	0	f(B6xCAST)-cM	r
	f(CASTxB6)-cM	-0.128514	0.19986	-0.157661	0.27799	-0.316505	0.1227	-0.355534	0.1226		0	0	0	0	0	f(CASTxB6)-cM	r
	m(B6xCAST)-cM	-0.103748	0.30441	-0.0411871	0.7789	-0.106197	0.61927	-0.170036	0.47667		0	0	0	0	0	m(B6xCAST)-cM	r
	m(CASTxB6)-cM	-0.126884	0.20792	-0.114139	0.43161	-0.24054	0.24634	-0.280635	0.2303		0	0	0	0	0	m(CASTxB6)-cM	r
	female-cM	-0.109934	0.27805	-0.106304	0.46807	-0.254542	0.22207	-0.286837	0.22147		0	0	0	0	0	female-cM	r
	male-cM	-0.120803	0.23258	-0.0818581	0.57791	-0.180725	0.38892	-0.23482	0.31689		0	0	0	0	0	male-cM	r
	ave-cM	-0.119078	0.23767	-0.0983731	0.50519	-0.227554	0.27829	-0.271255	0.24473		0	0	0	0	0	ave-cM	r
31.7-41.7	f(B6xCAST)-cM/Mb	-0.0857171	0.40386	-0.0533921	0.72338	-0.183277	0.38775	-0.20767	0.38523		0	0	0	0	0	f(B6xCAST)-cM/Mb	r
	f(CASTxB6)-cM/Mb	-0.128514	0.2012	-0.157661	0.27451	-0.316505	0.12546	-0.355534	0.12308		0	0	0	0	0	f(CASTxB6)-cM/Mb	r
	m(B6xCAST)-cM/Mb	-0.103748	0.30649	-0.0411871	0.78145	-0.106197	0.62214	-0.170036	0.47664		0	0	0	0	0	m(B6xCAST)-cM/Mb	r
	m(CASTxB6)-cM/Mb	-0.126884	0.20592	-0.11414	0.43191	-0.24054	0.24562	-0.280635	0.23016		0	0	0	0	0	m(CASTxB6)-cM/Mb	r
	female-cM/Mb	-0.109934	0.27765	-0.106304	0.46954	-0.254542	0.2208	-0.286837	0.22242		0	0	0	0	0	female-cM/Mb	r
	male-cM/Mb	-0.120803	0.23155	-0.0818581	0.57777	-0.180725	0.3874	-0.23482	0.31792		0	0	0	0	0	male-cM/Mb	r
	ave-cM/Mb	-0.119078	0.23747	-0.0983731	0.50377	-0.227554	0.27653	-0.271255	0.24779		0	0	0	0	0	ave-cM/Mb	r
41.7-51.7	f(B6xCAST)-cM	-0.134213	0.18138	-0.27855	0.0508501	-0.250087	0.22516	-0.211227	0.35044		0	0	0	0	0	f(B6xCAST)-cM	s
	f(CASTxB6)-cM	-0.0371201	0.70931	-0.189456	0.18656	-0.0927581	0.64938	-0.0785501	0.73935		0	0	0	0	0	f(CASTxB6)-cM	s
	m(B6xCAST)-cM	0.0379861	0.70011	0.0035541	0.9803	0.0847341	0.67217	-0.0433761	0.83209		0	0	0	0	0	m(B6xCAST)-cM	s
	m(CASTxB6)-cM	0.0061161	0.95112	-0.0616071	0.66805	0.0124411	0.94981	-0.103562	0.62525		0	0	0	0	0	m(CASTxB6)-cM	s
	female-cM	-0.0914791	0.36344	-0.253783	0.0744801	-0.179555	0.38652	-0.153771	0.51509		0	0	0	0	0	female-cM	s
	male-cM	0.0214281	0.83015	-0.0309751	0.8294	0.0464501	0.81316	-0.0753161	0.71433		0	0	0	0	0	male-cM	s
	ave-cM	-0.0167551	0.86705	-0.111013	0.44227	-0.0269511	0.89195	-0.10725	0.61578		0	0	0	0	0	ave-cM	s
41.7-51.7	f(B6xCAST)-cM/Mb	-0.134214	0.1796	-0.27855	0.0510001	-0.250088	0.22452	-0.211227	0.35075		0	0	0	0	0	f(B6xCAST)-cM/Mb	s
	f(CASTxB6)-cM/Mb	-0.0371201	0.70975	-0.189456	0.18691	-0.0927581	0.65274	-0.0785501	0.7413		0	0	0	0	0	f(CASTxB6)-cM/Mb	s
	m(B6xCAST)-cM/Mb	0.0379861	0.70536	0.0035541	0.98064	0.0847341	0.66961	-0.0433761	0.83187		0	0	0	0	0	m(B6xCAST)-cM/Mb	s
	m(CASTxB6)-cM/Mb	0.0061161	0.95141	-0.0616071	0.67056	0.0124411	0.94985	-0.103562	0.62372		0	0	0	0	0	m(CASTxB6)-cM/Mb	s
	female-cM/Mb	-0.0914791	0.36263	-0.253783	0.0740201	-0.179555	0.3888	-0.153771	0.51316		0	0	0	0	0	female-cM/Mb	s
	male-cM/Mb	0.0214281	0.8309	-0.0309751	0.83069	0.0464501	0.81531	-0.0753161	0.71513		0	0	0	0	0	male-cM/Mb	s
	ave-cM/Mb	-0.0167551	0.86836	-0.111013	0.44065	-0.0269511	0.89284	-0.10725	0.6148		0	0	0	0	0	ave-cM/Mb	s
51.7-61.7	f(B6xCAST)-cM	-0.0443491	0.6531	-0.0546101	0.70548	0.0266921	0.89962	0.0810391	0.7341		0	0	0	0	0	f(B6xCAST)-cM	t
	f(CASTxB6)-cM	-0.0417211	0.65111	-0.0857341	0.54083	0.0853331	0.68555	0.0350421	0.88262		0	0	0	0	0	f(CASTxB6)-cM	t
	m(B6xCAST)-cM	-0.0688851	0.4728	-0.0907181	0.52833	-0.0122801	0.9538	0.13012	0.57835		0	0	0	0	0	m(B6xCAST)-cM	t
	m(CASTxB6)-cM	-0.0631241	0.51904	-0.0581541	0.69335	-0.107152	0.61987	0.15263	0.52058		0	0	0	0	0	m(CASTxB6)-cM	t
	female-cM	-0.0454741	0.62825	-0.0770691	0.58918	0.0643411	0.76188	0.0603851	0.80106		0	0	0	0	0	female-cM	t
	male-cM	-0.0675141	0.48393	-0.0732721	0.61678	-0.0760141	0.71999	0.149485	0.529		0	0	0	0	0	male-cM	t
	ave-cM	-0.0651751	0.49382	-0.0821591	0.56689	-0.0308811	0.8816	0.138874	0.55587		0	0	0	0	0	ave-cM	t
51.7-61.7	f(B6xCAST)-cM/Mb	-0.0443491	0.65055	-0.0546101	0.70483	0.0266921	0.89869	0.0810381	0.7332		0	0	0	0	0	f(B6xCAST)-cM/Mb	t
	f(CASTxB6)-cM/Mb	-0.0417211	0.65068	-0.0857341	0.54625	0.0853331	0.6859	0.0350421	0.88253		0	0	0	0	0	f(CASTxB6)-cM/Mb	t
	m(B6xCAST)-cM/Mb	-0.0688841	0.47011	-0.0907171	0.53087	-0.0122801	0.95375	0.130119	0.57894		0	0	0	0	0	m(B6xCAST)-cM/Mb	t
	m(CASTxB6)-cM/Mb	-0.0631241	0.51982	-0.0581541	0.69382	-0.107152	0.61823	0.15263	0.5204		0	0	0	0	0	m(CASTxB6)-cM/Mb	t
	female-cM/Mb	-0.0454731	0.62928	-0.0770681	0.5848	0.0643411	0.75972	0.0603851	0.80036		0	0	0	0	0	female-cM/Mb	t
	male-cM/Mb	-0.0675151	0.48818	-0.0732721	0.61421	-0.0760141	0.72066	0.149485	0.53082		0	0	0	0	0	male-cM/Mb	t
	ave-cM/Mb	-0.0651751	0.49085	-0.0821591	0.56909	-0.0308801	0.88322	0.138874	0.55479		0	0	0	0	0	ave-cM/Mb	t
61.7-71.7	f(B6xCAST)-cM	0.0077571	0.93827	-0.0321541	0.82538	-0.0494591	0.81657	-0.107236	0.64707		0	0	0	0	0	f(B6xCAST)-cM	u
	f(CASTxB6)-cM	0.0703591	0.48162	0.0556261	0.70234	0.0183841	0.9318	-0.107355	0.6368		0	0	0	0	0	f(CASTxB6)-cM	u
	m(B6xCAST)-cM	0.0299041	0.76495	-0.0132471	0.93551	0.0647031	0.767	0.0832501	0.66915		0	0	0	0	0	m(B6xCAST)-cM	u
	m(CASTxB6)-cM	0.0508091	0.61679	0.0235851	0.88371	0.130249	0.55199	0.113568	0.537		0	0	0	0	0	m(CASTxB6)-cM	u
	female-cM	0.0408921	0.68322	0.0113711	0.93908	-0.0176181	0.93216	-0.113366	0.6282		0	0	0	0	0	female-cM	u
	male-cM	0.0415661	0.68199	0.0073381	0.96342	0.102018	0.64163	0.100594	0.59113		0	0	0	0	0	male-cM	u
	ave-cM	0.0498111	0.61475	0.0105921	0.94489	0.0707731	0.73648	0.0274651	0.90286		0	0	0	0	0	ave-cM	u
61.7-71.7	f(B6xCAST)-cM/Mb	0.0077571	0.93844	-0.0321551	0.82532	-0.0494591	0.81488	-0.107236	0.64604		0	0	0	0	0	f(B6xCAST)-cM/Mb	u
	f(CASTxB6)-cM/Mb	0.0703591	0.48249	0.0556251	0.705	0.0183841	0.93228	-0.107355	0.63837		0	0	0	0	0	f(CASTxB6)-cM/Mb	u
	m(B6xCAST)-cM/Mb	0.0299041	0.76767	-0.0132471	0.93461	0.0647031	0.76616	0.0832501	0.67015		0	0	0	0	0	m(B6xCAST)-cM/Mb	u
	m(CASTxB6)-cM/Mb	0.0508091	0.61624	0.0235851	0.88319	0.130249	0.55265	0.113568	0.53984		0	0	0	0	0	m(CASTxB6)-cM/Mb	u
	female-cM/Mb	0.0408921	0.68543	0.0113711	0.93793	-0.0176171	0.93311	-0.113366	0.62668		0	0	0	0	0	female-cM/Mb	u
	male-cM/Mb	0.0415661	0.68213	0.0073381	0.96353	0.102018	0.64278	0.100593	0.59428		0	0	0	0	0	male-cM/Mb	u
	ave-cM/Mb	0.0498111	0.6169	0.0105931	0.94586	0.0707731	0.73931	0.0274651	0.90398		0	0	0	0	0	ave-cM/Mb	u
71.7-81.7	f(B6xCAST)-cM	-0.145065	0.12537	-0.134117	0.34593	-0.0669581	0.75157	0.0865041	0.71167		0	0	0	0	0	f(B6xCAST)-cM	v
	f(CASTxB6)-cM	-0.0572271	0.57213	-0.0825181	0.56667	-0.0056181	0.97791	0.219207	0.34753		0	0	0	0	0	f(CASTxB6)-cM	v
	m(B6xCAST)-cM	-0.166661	0.0878901	-0.185723	0.19716	-0.109639	0.61027	-0.146696	0.52632		0	0	0	0	0	m(B6xCAST)-cM	v
	m(CASTxB6)-cM	-0.141652	0.14314	-0.168491	0.24488	-0.186455	0.37816	-0.254882	0.26975		0	0	0	0	0	m(CASTxB6)-cM	v
	female-cM	-0.121779	0.20437	-0.124198	0.38647	-0.0408191	0.84781	0.164071	0.48567		0	0	0	0	0	female-cM	v
	male-cM	-0.162071	0.0943501	-0.186925	0.19168	-0.149927	0.48545	-0.209643	0.3631		0	0	0	0	0	male-cM	v
	ave-cM	-0.164786	0.0948301	-0.179371	0.21123	-0.10342	0.62658	0.0078231	0.97303		0	0	0	0	0	ave-cM	v
71.7-81.7	f(B6xCAST)-cM/Mb	-0.145064	0.12456	-0.134117	0.34638	-0.0669581	0.75157	0.0865031	0.70517		0	0	0	0	0	f(B6xCAST)-cM/Mb	v
	f(CASTxB6)-cM/Mb	-0.0572271	0.56868	-0.0825171	0.56561	-0.0056201	0.97852	0.219206	0.35098		0	0	0	0	0	f(CASTxB6)-cM/Mb	v
	m(B6xCAST)-cM/Mb	-0.166661	0.0860301	-0.185723	0.19695	-0.109638	0.61334	-0.146696	0.5276		0	0	0	0	0	m(B6xCAST)-cM/Mb	v
	m(CASTxB6)-cM/Mb	-0.141653	0.1441	-0.168491	0.24465	-0.186455	0.37885	-0.254882	0.26911		0	0	0	0	0	m(CASTxB6)-cM/Mb	v
	female-cM/Mb	-0.121779	0.20375	-0.124198	0.38406	-0.0408191	0.8469	0.164072	0.48504		0	0	0	0	0	female-cM/Mb	v
	male-cM/Mb	-0.16207	0.0945101	-0.186924	0.19484	-0.149927	0.48155	-0.209643	0.36384		0	0	0	0	0	male-cM/Mb	v
	ave-cM/Mb	-0.164786	0.0935601	-0.179371	0.20992	-0.103421	0.62635	0.0078241	0.97451		0	0	0	0	0	ave-cM/Mb	v
81.7-91.7	f(B6xCAST)-cM	-0.0412131	0.66538	-0.0677851	0.62549	-0.0805411	0.70559	-0.131548	0.58876		0	0	0	0	0	f(B6xCAST)-cM	w
	f(CASTxB6)-cM	-0.0370201	0.68463	-0.0590281	0.65905	0.0023981	0.99101	-0.0346221	0.89411		0	0	0	0	0	f(CASTxB6)-cM	w
	m(B6xCAST)-cM	0.0321141	0.74955	0.0369771	0.78439	-0.120376	0.55169	-0.0387521	0.87405		0	0	0	0	0	m(B6xCAST)-cM	w
	m(CASTxB6)-cM	-0.0047661	0.9575	-0.0032341	0.97973	-0.0469591	0.80411	0.0259721	0.90948		0	0	0	0	0	m(CASTxB6)-cM	w
	female-cM	-0.0404291	0.65496	-0.0659641	0.62525	-0.0405581	0.84928	-0.0805921	0.74802		0	0	0	0	0	female-cM	w
	male-cM	0.0075011	0.93606	0.0115921	0.92915	-0.0758811	0.6985	0.0053391	0.98152		0	0	0	0	0	male-cM	w
	ave-cM	-0.0216891	0.80919	-0.0360581	0.78496	-0.0571551	0.78001	-0.0485521	0.84003		0	0	0	0	0	ave-cM	w
81.7-91.7	f(B6xCAST)-cM/Mb	-0.0412131	0.66303	-0.0677851	0.62347	-0.0805411	0.70667	-0.131548	0.58386		0	0	0	0	0	f(B6xCAST)-cM/Mb	w
	f(CASTxB6)-cM/Mb	-0.0370191	0.68495	-0.0590291	0.66226	0.0023981	0.99093	-0.0346221	0.89204		0	0	0	0	0	f(CASTxB6)-cM/Mb	w
	m(B6xCAST)-cM/Mb	0.0321151	0.74824	0.0369771	0.78209	-0.120377	0.55352	-0.0387521	0.87571		0	0	0	0	0	m(B6xCAST)-cM/Mb	w
	m(CASTxB6)-cM/Mb	-0.0047661	0.95836	-0.0032341	0.9804	-0.0469591	0.80653	0.0259721	0.91041		0	0	0	0	0	m(CASTxB6)-cM/Mb	w
	female-cM/Mb	-0.0404291	0.65612	-0.0659641	0.62742	-0.0405581	0.84767	-0.0805921	0.7462		0	0	0	0	0	female-cM/Mb	w
	male-cM/Mb	0.0075011	0.93547	0.0115931	0.92895	-0.0758811	0.70135	0.0053391	0.98169		0	0	0	0	0	male-cM/Mb	w
	ave-cM/Mb	-0.0216891	0.81076	-0.0360581	0.78573	-0.0571551	0.78021	-0.0485521	0.83948		0	0	0	0	0	ave-cM/Mb	w
91.7-101.7	f(B6xCAST)-cM	0.0073911	0.94178	0.0641931	0.65889	-0.0008791	0.99665	0.188276	0.42142		0	0	0	0	0	f(B6xCAST)-cM	x
	f(CASTxB6)-cM	0.0305481	0.76106	0.0073401	0.95953	-0.0812621	0.69895	0.214533	0.36064		0	0	0	0	0	f(CASTxB6)-cM	x
	m(B6xCAST)-cM	-0.0101921	0.91832	-0.0113311	0.93891	-0.229615	0.26949	-0.229488	0.32985		0	0	0	0	0	m(B6xCAST)-cM	x
	m(CASTxB6)-cM	-0.0375991	0.71601	-0.0266861	0.85774	-0.221451	0.28903	-0.23564	0.33053		0	0	0	0	0	m(CASTxB6)-cM	x
	female-cM	0.0205641	0.83871	0.0372461	0.79739	-0.0400041	0.84775	0.207555	0.37629		0	0	0	0	0	female-cM	x
	male-cM	-0.0262681	0.79546	-0.0208581	0.88817	-0.239186	0.24906	-0.248037	0.29719		0	0	0	0	0	male-cM	x
	ave-cM	-0.0043741	0.96543	0.0100691	0.94374	-0.168376	0.42406	-0.0293391	0.90305		0	0	0	0	0	ave-cM	x
91.7-101.7	f(B6xCAST)-cM/Mb	0.0073921	0.94218	0.0641931	0.66119	-0.0008791	0.99678	0.188276	0.42337		0	0	0	0	0	f(B6xCAST)-cM/Mb	x
	f(CASTxB6)-cM/Mb	0.0305481	0.75757	0.0073401	0.96001	-0.0812621	0.69896	0.214533	0.35997		0	0	0	0	0	f(CASTxB6)-cM/Mb	x
	m(B6xCAST)-cM/Mb	-0.0101911	0.92023	-0.0113311	0.93914	-0.229615	0.26937	-0.229488	0.33034		0	0	0	0	0	m(B6xCAST)-cM/Mb	x
	m(CASTxB6)-cM/Mb	-0.0375991	0.71215	-0.0266861	0.85762	-0.221451	0.28931	-0.23564	0.32709		0	0	0	0	0	m(CASTxB6)-cM/Mb	x
	female-cM/Mb	0.0205641	0.83928	0.0372461	0.79772	-0.0400041	0.84831	0.207555	0.37449		0	0	0	0	0	female-cM/Mb	x
	male-cM/Mb	-0.0262691	0.7963	-0.0208581	0.88754	-0.239186	0.25062	-0.248037	0.29958		0	0	0	0	0	male-cM/Mb	x
	ave-cM/Mb	-0.0043741	0.96546	0.0100701	0.94489	-0.168376	0.41919	-0.0293401	0.90077		0	0	0	0	0	ave-cM/Mb	x
101.7-111.7	f(B6xCAST)-cM	-0.0505691	0.59552	0.0003211	0.998	-0.0641851	0.7549	-0.0928111	0.69535		0	0	0	0	0	f(B6xCAST)-cM	y
	f(CASTxB6)-cM	-0.0217571	0.8286	0.0121941	0.93205	-0.0736851	0.73221	-0.225398	0.34339		0	0	0	0	0	f(CASTxB6)-cM	y
	m(B6xCAST)-cM	0.0212191	0.8332	0.137108	0.27894	0.0515721	0.82008	0.114488	0.63598		0	0	0	0	0	m(B6xCAST)-cM	y
	m(CASTxB6)-cM	-0.0397161	0.67978	0.0139441	0.9077	-0.0797611	0.69599	-0.118689	0.63337		0	0	0	0	0	m(CASTxB6)-cM	y
	female-cM	-0.0425501	0.66107	0.0049281	0.97112	-0.0710481	0.7337	-0.153243	0.51967		0	0	0	0	0	female-cM	y
	male-cM	-0.0118021	0.90327	0.0733211	0.55036	-0.0194601	0.9219	-0.0188301	0.93839		0	0	0	0	0	male-cM	y
	ave-cM	-0.0215831	0.82545	0.0527481	0.66748	-0.0372241	0.85217	-0.0669621	0.77991		0	0	0	0	0	ave-cM	y
101.7-111.7	f(B6xCAST)-cM/Mb	-0.0505691	0.59694	0.0003211	0.99806	-0.0641851	0.75189	-0.0928111	0.69669		0	0	0	0	0	f(B6xCAST)-cM/Mb	y
	f(CASTxB6)-cM/Mb	-0.0217561	0.82647	0.0121941	0.93113	-0.0736851	0.73285	-0.225398	0.34393		0	0	0	0	0	f(CASTxB6)-cM/Mb	y
	m(B6xCAST)-cM/Mb	0.0212191	0.83269	0.137108	0.27754	0.0515721	0.81876	0.114488	0.63842		0	0	0	0	0	m(B6xCAST)-cM/Mb	y
	m(CASTxB6)-cM/Mb	-0.0397161	0.68244	0.0139441	0.90962	-0.0797611	0.69542	-0.118689	0.63174		0	0	0	0	0	m(CASTxB6)-cM/Mb	y
	female-cM/Mb	-0.0425501	0.66554	0.0049281	0.96986	-0.0710481	0.73724	-0.153243	0.52171		0	0	0	0	0	female-cM/Mb	y
	male-cM/Mb	-0.0118011	0.90239	0.0733211	0.5517	-0.0194601	0.92314	-0.0188301	0.93829		0	0	0	0	0	male-cM/Mb	y
	ave-cM/Mb	-0.0215831	0.82501	0.0527481	0.66815	-0.0372241	0.85291	-0.0669621	0.77949		0	0	0	0	0	ave-cM/Mb	y
111.7-121.7	f(B6xCAST)-cM	0.0060891	0.95068	-0.0514881	0.70983	-0.0598141	0.77491	0.0447651	0.85931		0	0	0	0	0	f(B6xCAST)-cM	z
	f(CASTxB6)-cM	0.0123391	0.90305	-0.0028011	0.98367	-0.0151471	0.94193	0.0841051	0.76665		0	0	0	0	0	f(CASTxB6)-cM	z
	m(B6xCAST)-cM	0.0293291	0.77168	0.0447031	0.75733	0.130635	0.53897	-0.0595541	0.8035		0	0	0	0	0	m(B6xCAST)-cM	z
	m(CASTxB6)-cM	0.0864991	0.39193	0.0537541	0.71141	0.19969	0.33996	0.209749	0.3726		0	0	0	0	0	m(CASTxB6)-cM	z
	female-cM	0.0099031	0.92116	-0.0249051	0.86214	-0.0355371	0.8664	0.0684591	0.80247		0	0	0	0	0	female-cM	z
	male-cM	0.0605831	0.54854	0.0518531	0.72191	0.173474	0.40945	0.0838651	0.72444		0	0	0	0	0	male-cM	z
	ave-cM	0.0405151	0.68808	0.0178921	0.90027	0.0817691	0.69589	0.0826441	0.72981		0	0	0	0	0	ave-cM	z
111.7-121.7	f(B6xCAST)-cM/Mb	0.0060891	0.95246	-0.0514881	0.71134	-0.0598141	0.77392	0.0447651	0.86145		0	0	0	0	0	f(B6xCAST)-cM/Mb	z
	f(CASTxB6)-cM/Mb	0.0123391	0.90141	-0.0028011	0.9847	-0.0151471	0.94379	0.0841051	0.76585		0	0	0	0	0	f(CASTxB6)-cM/Mb	z
	m(B6xCAST)-cM/Mb	0.0293291	0.77169	0.0447031	0.75981	0.130635	0.53839	-0.0595541	0.80498		0	0	0	0	0	m(B6xCAST)-cM/Mb	z
	m(CASTxB6)-cM/Mb	0.0864991	0.39301	0.0537551	0.7106	0.19969	0.33804	0.20975	0.37369		0	0	0	0	0	m(CASTxB6)-cM/Mb	z
	female-cM/Mb	0.0099031	0.92115	-0.0249051	0.86036	-0.0355371	0.86699	0.0684591	0.80519		0	0	0	0	0	female-cM/Mb	z
	male-cM/Mb	0.0605831	0.55146	0.0518531	0.7238	0.173474	0.40915	0.0838651	0.72353		0	0	0	0	0	male-cM/Mb	z
	ave-cM/Mb	0.0405151	0.68899	0.0178931	0.90233	0.0817691	0.69867	0.0826441	0.73151		0	0	0	0	0	ave-cM/Mb	z

## Sheet: RNA
section (Mbp position)	cross	100.cor	100.sig	200.cor	200.sig	400.cor	400.sig	500.cor	500.sig	111111	100kb	200kb	400kb	500kb	SUM	cross	section
3-13	f(B6xCAST)-cM	nan10	1e-07	nan10	1e-07	nan10	1e-07	nan10	1e-07		111111	111111	111111	111111	444444	f(B6xCAST)-cM	A
	f(CASTxB6)-cM	nan10	1e-07	nan10	1e-07	nan10	1e-07	nan10	1e-07		111111	111111	111111	111111	444444	f(CASTxB6)-cM	A
	m(B6xCAST)-cM	nan10	1e-07	nan10	1e-07	nan10	1e-07	nan10	1e-07		111111	111111	111111	111111	444444	m(B6xCAST)-cM	A
	m(CASTxB6)-cM	nan10	1e-07	nan10	1e-07	nan10	1e-07	nan10	1e-07		111111	111111	111111	111111	444444	m(CASTxB6)-cM	A
	female-cM	nan10	1e-07	nan10	1e-07	nan10	1e-07	nan10	1e-07		111111	111111	111111	111111	444444	female-cM	A
	male-cM	nan10	1e-07	nan10	1e-07	nan10	1e-07	nan10	1e-07		111111	111111	111111	111111	444444	male-cM	A
	ave-cM	nan10	1e-07	nan10	1e-07	nan10	1e-07	nan10	1e-07		111111	111111	111111	111111	444444	ave-cM	A
3-13	f(B6xCAST)-cM/Mb	nan10	1e-07	nan10	1e-07	nan10	1e-07	nan10	1e-07		111111	111111	111111	111111	444444	f(B6xCAST)-cM/Mb	A
	f(CASTxB6)-cM/Mb	nan10	1e-07	nan10	1e-07	nan10	1e-07	nan10	1e-07		111111	111111	111111	111111	444444	f(CASTxB6)-cM/Mb	A
	m(B6xCAST)-cM/Mb	nan10	1e-07	nan10	1e-07	nan10	1e-07	nan10	1e-07		111111	111111	111111	111111	444444	m(B6xCAST)-cM/Mb	A
	m(CASTxB6)-cM/Mb	nan10	1e-07	nan10	1e-07	nan10	1e-07	nan10	1e-07		111111	111111	111111	111111	444444	m(CASTxB6)-cM/Mb	A
	female-cM/Mb	nan10	1e-07	nan10	1e-07	nan10	1e-07	nan10	1e-07		111111	111111	111111	111111	444444	female-cM/Mb	A
	male-cM/Mb	nan10	1e-07	nan10	1e-07	nan10	1e-07	nan10	1e-07		111111	111111	111111	111111	444444	male-cM/Mb	A
	ave-cM/Mb	nan10	1e-07	nan10	1e-07	nan10	1e-07	nan10	1e-07		111111	111111	111111	111111	444444	ave-cM/Mb	A
13-23	f(B6xCAST)-cM	0.0188071	0.81511	0.0195461	0.87443	-0.0700071	0.75351	-0.138895	0.54052		0	0	0	0	0	f(B6xCAST)-cM	B
	f(CASTxB6)-cM	-0.0275881	0.74304	-0.0690041	0.58969	-0.184365	0.37794	-0.286471	0.19254		0	0	0	0	0	f(CASTxB6)-cM	B
	m(B6xCAST)-cM	0.0137981	0.90101	0.0004891	0.99689	-0.0408941	0.85233	-0.122866	0.62836		0	0	0	0	0	m(B6xCAST)-cM	B
	m(CASTxB6)-cM	-0.0139041	0.88675	-0.0650541	0.62153	-0.161956	0.38439	-0.191267	0.35681		0	0	0	0	0	m(CASTxB6)-cM	B
	female-cM	-0.0051291	0.95133	-0.0258841	0.83953	-0.131735	0.54945	-0.218543	0.32044		0	0	0	0	0	female-cM	B
	male-cM	0.0018301	0.98472	-0.0295871	0.83235	-0.0944141	0.63735	-0.156319	0.48201		0	0	0	0	0	male-cM	B
	ave-cM	-0.0020631	0.98376	-0.0325231	0.83213	-0.13327	0.55292	-0.223729	0.33764		0	0	0	0	0	ave-cM	B
13-23	f(B6xCAST)-cM/Mb	0.0188071	0.8167	0.0195461	0.87498	-0.0700071	0.75699	-0.138895	0.54025		0	0	0	0	0	f(B6xCAST)-cM/Mb	B
	f(CASTxB6)-cM/Mb	-0.0275881	0.74425	-0.0690041	0.59106	-0.184365	0.37804	-0.286471	0.19224		0	0	0	0	0	f(CASTxB6)-cM/Mb	B
	m(B6xCAST)-cM/Mb	0.0137981	0.89927	0.0004891	0.99719	-0.0408941	0.85421	-0.122866	0.62987		0	0	0	0	0	m(B6xCAST)-cM/Mb	B
	m(CASTxB6)-cM/Mb	-0.0139051	0.88586	-0.0650541	0.6206	-0.161956	0.38572	-0.191267	0.36		0	0	0	0	0	m(CASTxB6)-cM/Mb	B
	female-cM/Mb	-0.0051291	0.95137	-0.0258841	0.83751	-0.131735	0.54584	-0.218544	0.32277		0	0	0	0	0	female-cM/Mb	B
	male-cM/Mb	0.0018301	0.98477	-0.0295871	0.83261	-0.0944141	0.63623	-0.156319	0.48588		0	0	0	0	0	male-cM/Mb	B
	ave-cM/Mb	-0.0020631	0.98362	-0.0325221	0.83153	-0.13327	0.55053	-0.223729	0.33894		0	0	0	0	0	ave-cM/Mb	B
23-33	f(B6xCAST)-cM	-0.100031	0.18934	-0.191512	0.14027	-0.145433	0.43994	-0.20912	0.35796		0	0	0	0	0	f(B6xCAST)-cM	C
	f(CASTxB6)-cM	-0.0873071	0.12761	-0.149201	0.2069	-0.133025	0.47198	-0.108901	0.65923		0	0	0	0	0	f(CASTxB6)-cM	C
	m(B6xCAST)-cM	0.0708831	0.39596	0.0459321	0.76	0.29757	0.10873	0.383678	0.0888001		0	0	0	0	0	m(B6xCAST)-cM	C
	m(CASTxB6)-cM	-0.0597151	0.55123	-0.0522081	0.78796	0.191176	0.33893	0.202005	0.34623		0	0	0	0	0	m(CASTxB6)-cM	C
	female-cM	-0.0980101	0.12911	-0.177494	0.14966	-0.142537	0.41627	-0.158999	0.42866		0	0	0	0	0	female-cM	C
	male-cM	0.0062281	0.94447	-0.0018401	0.99309	0.26078	0.13497	0.309093	0.12352		0	0	0	0	0	male-cM	C
	ave-cM	-0.0565741	0.49382	-0.106116	0.4544	0.0465671	0.84661	0.0504161	0.83204		0	0	0	0	0	ave-cM	C
23-33	f(B6xCAST)-cM/Mb	-0.100031	0.16206	-0.191512	0.14423	-0.145433	0.43238	-0.20912	0.35716		0	0	0	0	0	f(B6xCAST)-cM/Mb	C
	f(CASTxB6)-cM/Mb	-0.0873071	0.17044	-0.149201	0.20596	-0.133026	0.47138	-0.108901	0.65831		0	0	0	0	0	f(CASTxB6)-cM/Mb	C
	m(B6xCAST)-cM/Mb	0.0708831	0.39528	0.0459321	0.7595	0.29757	0.10932	0.383679	0.0869801		0	0	0	0	0	m(B6xCAST)-cM/Mb	C
	m(CASTxB6)-cM/Mb	-0.0597151	0.55616	-0.0522071	0.78806	0.191177	0.33894	0.202004	0.34643		0	0	0	0	0	m(CASTxB6)-cM/Mb	C
	female-cM/Mb	-0.0980101	0.1433	-0.177493	0.15315	-0.142537	0.4189	-0.158999	0.42821		0	0	0	0	0	female-cM/Mb	C
	male-cM/Mb	0.0062271	0.94454	-0.0018401	0.99322	0.26078	0.13376	0.309093	0.12345		0	0	0	0	0	male-cM/Mb	C
	ave-cM/Mb	-0.0565741	0.49677	-0.106116	0.45797	0.0465671	0.84753	0.0504161	0.83243		0	0	0	0	0	ave-cM/Mb	C
33-43	f(B6xCAST)-cM	-0.0459901	0.42395	-0.0782681	0.486	-0.134638	0.54875	-0.0526701	0.87096		0	0	0	0	0	f(B6xCAST)-cM	D
	f(CASTxB6)-cM	-0.0052971	0.95461	-0.0662061	0.58048	-0.168998	0.41639	-0.0279651	0.92011		0	0	0	0	0	f(CASTxB6)-cM	D
	m(B6xCAST)-cM	0.187132	0.0405001	0.160866	0.10832	0.0942551	0.70575	0.190728	0.42773		111111	0	0	0	111111	m(B6xCAST)-cM	D
	m(CASTxB6)-cM	0.0349811	0.74396	-0.0158731	0.91606	-0.0890791	0.79982	0.107016	0.78688		0	0	0	0	0	m(CASTxB6)-cM	D
	female-cM	-0.0270001	0.72066	-0.0743801	0.52712	-0.155387	0.47409	-0.0411791	0.89418		0	0	0	0	0	female-cM	D
	male-cM	0.11745	0.0992401	0.0737111	0.61849	0.0037801	0.99261	0.153925	0.57735		0	0	0	0	0	male-cM	D
	ave-cM	0.0374901	0.65527	-0.0070401	0.96832	-0.0820311	0.74295	0.0572561	0.8764		0	0	0	0	0	ave-cM	D
33-43	f(B6xCAST)-cM/Mb	-0.0459901	0.4248	-0.0782681	0.4828	-0.134638	0.54628	-0.0526701	0.86935		0	0	0	0	0	f(B6xCAST)-cM/Mb	D
	f(CASTxB6)-cM/Mb	-0.0052971	0.95601	-0.0662061	0.58114	-0.168998	0.41847	-0.0279651	0.92024		0	0	0	0	0	f(CASTxB6)-cM/Mb	D
	m(B6xCAST)-cM/Mb	0.187132	0.0410101	0.160866	0.11297	0.0942561	0.7027	0.190729	0.427		111111	0	0	0	111111	m(B6xCAST)-cM/Mb	D
	m(CASTxB6)-cM/Mb	0.0349801	0.74504	-0.0158731	0.9163	-0.0890791	0.79959	0.107016	0.78654		0	0	0	0	0	m(CASTxB6)-cM/Mb	D
	female-cM/Mb	-0.0270001	0.72118	-0.0743801	0.52935	-0.155387	0.4727	-0.0411791	0.89655		0	0	0	0	0	female-cM/Mb	D
	male-cM/Mb	0.11745	0.0999101	0.0737111	0.62347	0.0037801	0.99573	0.153925	0.58075		0	0	0	0	0	male-cM/Mb	D
	ave-cM/Mb	0.0374901	0.65399	-0.0070401	0.96875	-0.0820311	0.74295	0.0572561	0.87451		0	0	0	0	0	ave-cM/Mb	D
43-53	f(B6xCAST)-cM	-0.0823531	0.28495	-0.162519	0.12942	-0.13951	0.53009	-0.0934721	0.66197		0	0	0	0	0	f(B6xCAST)-cM	E
	f(CASTxB6)-cM	-0.0814261	0.22122	-0.161249	0.15551	-0.173056	0.4081	-0.214304	0.38901		0	0	0	0	0	f(CASTxB6)-cM	E
	m(B6xCAST)-cM	-0.0506681	0.22762	-0.0864661	0.41851	0.0155081	0.97391	0.0137851	0.97978		0	0	0	0	0	m(B6xCAST)-cM	E
	m(CASTxB6)-cM	-0.0537421	0.26261	-0.0924391	0.40127	-0.0004041	0.99881	-0.0003131	0.99924		0	0	0	0	0	m(CASTxB6)-cM	E
	female-cM	-0.0899911	0.1644	-0.178368	0.1381	-0.171992	0.48486	-0.167513	0.4675		0	0	0	0	0	female-cM	E
	male-cM	-0.0526751	0.21912	-0.0902011	0.3901	0.0070801	0.99251	0.0064371	0.99426		0	0	0	0	0	male-cM	E
	ave-cM	-0.0721791	0.15997	-0.129227	0.20155	-0.0532281	0.81506	-0.0507231	0.85155		0	0	0	0	0	ave-cM	E
43-53	f(B6xCAST)-cM/Mb	-0.0823531	0.2263	-0.162519	0.13315	-0.13951	0.53025	-0.0934721	0.6618		0	0	0	0	0	f(B6xCAST)-cM/Mb	E
	f(CASTxB6)-cM/Mb	-0.0814261	0.17126	-0.161249	0.14257	-0.173056	0.40771	-0.214304	0.39213		0	0	0	0	0	f(CASTxB6)-cM/Mb	E
	m(B6xCAST)-cM/Mb	-0.0506681	0.2469	-0.0864661	0.41432	0.0155081	0.97203	0.0137851	0.98078		0	0	0	0	0	m(B6xCAST)-cM/Mb	E
	m(CASTxB6)-cM/Mb	-0.0537421	0.2242	-0.0924391	0.39681	-0.0004041	0.99869	-0.0003131	0.99867		0	0	0	0	0	m(CASTxB6)-cM/Mb	E
	female-cM/Mb	-0.0899911	0.19672	-0.178368	0.14016	-0.171992	0.48735	-0.167513	0.46326		0	0	0	0	0	female-cM/Mb	E
	male-cM/Mb	-0.0526751	0.17927	-0.0902001	0.38859	0.0070801	0.99295	0.0064371	0.99436		0	0	0	0	0	male-cM/Mb	E
	ave-cM/Mb	-0.0721791	0.1546	-0.129227	0.20084	-0.0532281	0.81626	-0.0507221	0.85266		0	0	0	0	0	ave-cM/Mb	E
53-63	f(B6xCAST)-cM	-0.0395111	0.70853	-0.0912911	0.51683	-0.122513	0.57555	-0.145033	0.5546		0	0	0	0	0	f(B6xCAST)-cM	F
	f(CASTxB6)-cM	0.0345111	0.59035	-0.0391631	0.73381	-0.0497321	0.81224	-0.0193031	0.93895		0	0	0	0	0	f(CASTxB6)-cM	F
	m(B6xCAST)-cM	-0.0391251	0.53714	-0.0945971	0.42712	-0.141374	0.51483	-0.128738	0.62898		0	0	0	0	0	m(B6xCAST)-cM	F
	m(CASTxB6)-cM	-0.0217991	0.83782	-0.0394691	0.874	0.0722871	0.7865	-0.0694481	0.78242		0	0	0	0	0	m(CASTxB6)-cM	F
	female-cM	0.0062741	0.93712	-0.0644421	0.59261	-0.0884671	0.68198	-0.0836631	0.74979		0	0	0	0	0	female-cM	F
	male-cM	-0.0295711	0.72662	-0.0629421	0.73309	-0.0118571	0.96328	-0.0963131	0.70724		0	0	0	0	0	male-cM	F
	ave-cM	-0.0215891	0.77711	-0.0711681	0.6367	-0.0399231	0.8727	-0.11448	0.6643		0	0	0	0	0	ave-cM	F
53-63	f(B6xCAST)-cM/Mb	-0.0395111	0.70687	-0.0912911	0.51257	-0.122513	0.57605	-0.145033	0.55401		0	0	0	0	0	f(B6xCAST)-cM/Mb	F
	f(CASTxB6)-cM/Mb	0.0345121	0.59012	-0.0391621	0.73285	-0.0497321	0.81011	-0.0193031	0.93796		0	0	0	0	0	f(CASTxB6)-cM/Mb	F
	m(B6xCAST)-cM/Mb	-0.0391251	0.53866	-0.0945971	0.4308	-0.141374	0.51498	-0.128738	0.63036		0	0	0	0	0	m(B6xCAST)-cM/Mb	F
	m(CASTxB6)-cM/Mb	-0.0217991	0.83867	-0.0394691	0.87307	0.0722871	0.78661	-0.0694481	0.78161		0	0	0	0	0	m(CASTxB6)-cM/Mb	F
	female-cM/Mb	0.0062741	0.93827	-0.0644431	0.59405	-0.0884661	0.67947	-0.0836631	0.74984		0	0	0	0	0	female-cM/Mb	F
	male-cM/Mb	-0.0295711	0.72506	-0.0629421	0.73507	-0.0118571	0.96238	-0.0963131	0.70746		0	0	0	0	0	male-cM/Mb	F
	ave-cM/Mb	-0.0215891	0.7755	-0.0711681	0.63689	-0.0399221	0.87388	-0.11448	0.66692		0	0	0	0	0	ave-cM/Mb	F
63-73	f(B6xCAST)-cM	0.221797	0.0383601	0.204285	0.10112	0.412012	0.0388101	0.350352	0.0846001		111111	0	111111	0	222222	f(B6xCAST)-cM	G
	f(CASTxB6)-cM	0.190017	0.0544501	0.0965181	0.51193	0.360275	0.0574301	0.504468	0.0221201		0	0	0	111111	111111	f(CASTxB6)-cM	G
	m(B6xCAST)-cM	0.130129	0.11393	0.0945521	0.49939	0.386801	0.0484301	0.321502	0.13679		0	0	111111	0	111111	m(B6xCAST)-cM	G
	m(CASTxB6)-cM	0.116279	0.18925	0.0855451	0.53514	0.235523	0.23425	0.217022	0.36086		0	0	0	0	0	m(CASTxB6)-cM	G
	female-cM	0.222886	0.0433301	0.16527	0.23661	0.416161	0.0387301	0.456294	0.0377901		111111	0	111111	111111	333333	female-cM	G
	male-cM	0.130886	0.0971901	0.0966451	0.49032	0.335406	0.0730401	0.292808	0.18267		0	0	0	0	0	male-cM	G
	ave-cM	0.200828	0.0600401	0.146548	0.29395	0.410069	0.0369001	0.424495	0.0478201		0	0	111111	111111	222222	ave-cM	G
63-73	f(B6xCAST)-cM/Mb	0.221797	0.0396201	0.204285	0.10103	0.412012	0.0390501	0.350352	0.0844801		111111	0	111111	0	222222	f(B6xCAST)-cM/Mb	G
	f(CASTxB6)-cM/Mb	0.190017	0.0549801	0.0965181	0.5116	0.360275	0.0566201	0.504468	0.0228901		0	0	0	111111	111111	f(CASTxB6)-cM/Mb	G
	m(B6xCAST)-cM/Mb	0.130129	0.1109	0.0945521	0.5028	0.3868	0.0470701	0.321502	0.13607		0	0	111111	0	111111	m(B6xCAST)-cM/Mb	G
	m(CASTxB6)-cM/Mb	0.116278	0.18774	0.0855461	0.53273	0.235523	0.23086	0.217023	0.36388		0	0	0	0	0	m(CASTxB6)-cM/Mb	G
	female-cM/Mb	0.222886	0.0437801	0.16527	0.23452	0.416162	0.0403101	0.456294	0.0378001		111111	0	111111	111111	333333	female-cM/Mb	G
	male-cM/Mb	0.130887	0.0984101	0.0966451	0.49114	0.335406	0.0725001	0.292808	0.18412		0	0	0	0	0	male-cM/Mb	G
	ave-cM/Mb	0.200828	0.0581801	0.146548	0.29432	0.410069	0.0372001	0.424495	0.0467601		0	0	111111	111111	222222	ave-cM/Mb	G
73-83	f(B6xCAST)-cM	nan10	1e-07	nan10	1e-07	nan10	1e-07	nan10	1e-07		111111	111111	111111	111111	444444	f(B6xCAST)-cM	H
	f(CASTxB6)-cM	nan10	1e-07	nan10	1e-07	nan10	1e-07	nan10	1e-07		111111	111111	111111	111111	444444	f(CASTxB6)-cM	H
	m(B6xCAST)-cM	nan10	1e-07	nan10	1e-07	nan10	1e-07	nan10	1e-07		111111	111111	111111	111111	444444	m(B6xCAST)-cM	H
	m(CASTxB6)-cM	nan10	1e-07	nan10	1e-07	nan10	1e-07	nan10	1e-07		111111	111111	111111	111111	444444	m(CASTxB6)-cM	H
	female-cM	nan10	1e-07	nan10	1e-07	nan10	1e-07	nan10	1e-07		111111	111111	111111	111111	444444	female-cM	H
	male-cM	nan10	1e-07	nan10	1e-07	nan10	1e-07	nan10	1e-07		111111	111111	111111	111111	444444	male-cM	H
	ave-cM	nan10	1e-07	nan10	1e-07	nan10	1e-07	nan10	1e-07		111111	111111	111111	111111	444444	ave-cM	H
73-83	f(B6xCAST)-cM/Mb	nan10	1e-07	nan10	1e-07	nan10	1e-07	nan10	1e-07		111111	111111	111111	111111	444444	f(B6xCAST)-cM/Mb	H
	f(CASTxB6)-cM/Mb	nan10	1e-07	nan10	1e-07	nan10	1e-07	nan10	1e-07		111111	111111	111111	111111	444444	f(CASTxB6)-cM/Mb	H
	m(B6xCAST)-cM/Mb	nan10	1e-07	nan10	1e-07	nan10	1e-07	nan10	1e-07		111111	111111	111111	111111	444444	m(B6xCAST)-cM/Mb	H
	m(CASTxB6)-cM/Mb	nan10	1e-07	nan10	1e-07	nan10	1e-07	nan10	1e-07		111111	111111	111111	111111	444444	m(CASTxB6)-cM/Mb	H
	female-cM/Mb	nan10	1e-07	nan10	1e-07	nan10	1e-07	nan10	1e-07		111111	111111	111111	111111	444444	female-cM/Mb	H
	male-cM/Mb	nan10	1e-07	nan10	1e-07	nan10	1e-07	nan10	1e-07		111111	111111	111111	111111	444444	male-cM/Mb	H
	ave-cM/Mb	nan10	1e-07	nan10	1e-07	nan10	1e-07	nan10	1e-07		111111	111111	111111	111111	444444	ave-cM/Mb	H
83-93	f(B6xCAST)-cM	0.259421	0.0440901	0.183763	0.13782	0.0695591	0.76225	0.0169451	0.94533		111111	0	0	0	111111	f(B6xCAST)-cM	I
	f(CASTxB6)-cM	0.238751	0.0718101	0.187725	0.14925	0.0793411	0.85587	-0.0104461	0.98124		0	0	0	0	0	f(CASTxB6)-cM	I
	m(B6xCAST)-cM	0.10953	0.16159	0.0682511	0.65222	0.137196	0.5791	-0.131065	0.65708		0	0	0	0	0	m(B6xCAST)-cM	I
	m(CASTxB6)-cM	0.0737351	0.13607	0.0213621	0.92979	0.111331	0.57706	-0.0795041	0.7882		0	0	0	0	0	m(CASTxB6)-cM	I
	female-cM	0.257255	0.0678301	0.193179	0.14408	0.0780731	0.77615	0.0018721	0.99555		0	0	0	0	0	female-cM	I
	male-cM	0.0884451	0.12477	0.0398001	0.85303	0.125592	0.57849	-0.100635	0.67895		0	0	0	0	0	male-cM	I
	ave-cM	0.19895	0.0744701	0.138357	0.21454	0.102379	0.67569	-0.0408161	0.87228		0	0	0	0	0	ave-cM	I
83-93	f(B6xCAST)-cM/Mb	0.259421	0.0437201	0.183763	0.13805	0.0695591	0.76121	0.0169461	0.94618		111111	0	0	0	111111	f(B6xCAST)-cM/Mb	I
	f(CASTxB6)-cM/Mb	0.238751	0.0742701	0.187725	0.14885	0.0793411	0.85736	-0.0104461	0.98076		0	0	0	0	0	f(CASTxB6)-cM/Mb	I
	m(B6xCAST)-cM/Mb	0.10953	0.16454	0.0682521	0.65392	0.137195	0.57894	-0.131065	0.65854		0	0	0	0	0	m(B6xCAST)-cM/Mb	I
	m(CASTxB6)-cM/Mb	0.0737351	0.13558	0.0213621	0.93006	0.111331	0.57962	-0.0795041	0.7861		0	0	0	0	0	m(CASTxB6)-cM/Mb	I
	female-cM/Mb	0.257255	0.0667701	0.193179	0.14342	0.0780731	0.77532	0.0018721	0.99615		0	0	0	0	0	female-cM/Mb	I
	male-cM/Mb	0.0884451	0.12542	0.0398001	0.85467	0.125593	0.57589	-0.100635	0.68027		0	0	0	0	0	male-cM/Mb	I
	ave-cM/Mb	0.198951	0.0729501	0.138357	0.21331	0.102379	0.67358	-0.0408161	0.87432		0	0	0	0	0	ave-cM/Mb	I
93-103	f(B6xCAST)-cM	-0.0670491	0.51107	-0.146012	0.31674	-0.0299871	0.88621	0.117178	0.63697		0	0	0	0	0	f(B6xCAST)-cM	J
	f(CASTxB6)-cM	-0.0462201	0.64698	-0.143177	0.32849	-0.0688481	0.74801	0.0999931	0.68979		0	0	0	0	0	f(CASTxB6)-cM	J
	m(B6xCAST)-cM	0.0670991	0.49512	0.0485751	0.75071	-0.0213421	0.92218	0.10355	0.67797		0	0	0	0	0	m(B6xCAST)-cM	J
	m(CASTxB6)-cM	0.211405	0.0428401	0.278008	0.0442601	0.240439	0.24619	0.455657	0.0550301		111111	111111	0	0	222222	m(CASTxB6)-cM	J
	female-cM	-0.0599761	0.55833	-0.154122	0.28973	-0.0514311	0.80578	0.113916	0.65221		0	0	0	0	0	female-cM	J
	male-cM	0.153154	0.0913501	0.184672	0.15757	0.131906	0.54236	0.331134	0.12521		0	0	0	0	0	male-cM	J
	ave-cM	0.0602531	0.56199	0.0154941	0.91853	0.0476841	0.82297	0.26563	0.25822		0	0	0	0	0	ave-cM	J
93-103	f(B6xCAST)-cM/Mb	-0.0670491	0.50927	-0.146012	0.3172	-0.0299871	0.88856	0.117178	0.6376		0	0	0	0	0	f(B6xCAST)-cM/Mb	J
	f(CASTxB6)-cM/Mb	-0.0462201	0.64761	-0.143177	0.32853	-0.0688481	0.74758	0.0999941	0.68537		0	0	0	0	0	f(CASTxB6)-cM/Mb	J
	m(B6xCAST)-cM/Mb	0.0670991	0.49526	0.0485741	0.74716	-0.0213421	0.92263	0.10355	0.67761		0	0	0	0	0	m(B6xCAST)-cM/Mb	J
	m(CASTxB6)-cM/Mb	0.211405	0.0420801	0.278008	0.0422901	0.240439	0.24404	0.455657	0.0537001		111111	111111	0	0	222222	m(CASTxB6)-cM/Mb	J
	female-cM/Mb	-0.0599771	0.56021	-0.154122	0.2902	-0.0514301	0.80647	0.113916	0.65025		0	0	0	0	0	female-cM/Mb	J
	male-cM/Mb	0.153154	0.0910701	0.184672	0.15713	0.131907	0.54136	0.331133	0.12237		0	0	0	0	0	male-cM/Mb	J
	ave-cM/Mb	0.0602531	0.56194	0.0154931	0.9185	0.0476841	0.82455	0.265631	0.26133		0	0	0	0	0	ave-cM/Mb	J
103-113	f(B6xCAST)-cM	-0.0064951	0.94673	0.421045	0.0372901	0.333434	0.0925701	0.293738	0.1346		0	111111	0	0	111111	f(B6xCAST)-cM	K
	f(CASTxB6)-cM	-0.0154131	0.87096	0.111658	0.1157	0.0571331	0.76547	-0.0010791	0.99263		0	0	0	0	0	f(CASTxB6)-cM	K
	m(B6xCAST)-cM	0.0072321	0.94188	0.524231	0.0082501	0.450625	0.0396801	0.416558	0.0627901		0	111111	111111	0	222222	m(B6xCAST)-cM	K
	m(CASTxB6)-cM	0.0236631	0.76049	0.604535	0.0079901	0.547352	0.0278901	0.477186	0.0459501		0	111111	111111	111111	333333	m(CASTxB6)-cM	K
	female-cM	-0.0119281	0.90165	0.273046	0.0677401	0.194574	0.19888	0.134436	0.41925		0	0	0	0	0	female-cM	K
	male-cM	0.0166451	0.84329	0.591915	0.0082201	0.523813	0.0346701	0.473218	0.0520701		0	111111	111111	0	222222	male-cM	K
	ave-cM	0.0046291	0.96623	0.488766	0.0131001	0.398999	0.0510401	0.329766	0.1111		0	111111	0	0	111111	ave-cM	K
103-113	f(B6xCAST)-cM/Mb	-0.0064941	0.94498	0.421045	0.0394301	0.333434	0.0940701	0.293738	0.13399		0	111111	0	0	111111	f(B6xCAST)-cM/Mb	K
	f(CASTxB6)-cM/Mb	-0.0154131	0.87091	0.111658	0.11434	0.0571331	0.76515	-0.0010791	0.99437		0	0	0	0	0	f(CASTxB6)-cM/Mb	K
	m(B6xCAST)-cM/Mb	0.0072321	0.94282	0.524231	0.0082801	0.450625	0.0384601	0.416558	0.0630101		0	111111	111111	0	222222	m(B6xCAST)-cM/Mb	K
	m(CASTxB6)-cM/Mb	0.0236631	0.76235	0.604535	0.0082401	0.547352	0.0266701	0.477186	0.0465901		0	111111	111111	111111	333333	m(CASTxB6)-cM/Mb	K
	female-cM/Mb	-0.0119281	0.90031	0.273046	0.0686501	0.194575	0.19711	0.134436	0.41624		0	0	0	0	0	female-cM/Mb	K
	male-cM/Mb	0.0166451	0.84296	0.591915	0.0083501	0.523813	0.0331001	0.473218	0.0530901		0	111111	111111	0	222222	male-cM/Mb	K
	ave-cM/Mb	0.0046291	0.96604	0.488766	0.0122901	0.398999	0.0515101	0.329766	0.11003		0	111111	0	0	111111	ave-cM/Mb	K
113-121.7	f(B6xCAST)-cM	-0.0606491	0.48018	0.0829071	0.5307	-0.0001971	0.99829	-0.0529961	0.85416		0	0	0	0	0	f(B6xCAST)-cM	L
	f(CASTxB6)-cM	-0.0414421	0.61	-0.0627521	0.63994	-0.162061	0.48207	-0.228661	0.42569		0	0	0	0	0	f(CASTxB6)-cM	L
	m(B6xCAST)-cM	-0.0924621	0.14811	-0.0714021	0.69392	-0.179179	0.4101	-0.178421	0.47196		0	0	0	0	0	m(B6xCAST)-cM	L
	m(CASTxB6)-cM	-0.0757131	0.43935	0.0215421	0.90404	0.0646231	0.84164	0.0494151	0.84991		0	0	0	0	0	m(CASTxB6)-cM	L
	female-cM	-0.0522961	0.4894	0.0065821	0.96234	-0.0889391	0.76583	-0.152379	0.58198		0	0	0	0	0	female-cM	L
	male-cM	-0.0877551	0.27674	-0.0271611	0.86289	-0.0615041	0.81806	-0.0688391	0.78937		0	0	0	0	0	male-cM	L
	ave-cM	-0.0791731	0.31639	-0.0159461	0.92113	-0.0735361	0.81971	-0.0989561	0.73439		0	0	0	0	0	ave-cM	L
113-121.7	f(B6xCAST)-cM/Mb	-0.0606491	0.47883	0.0829071	0.52997	-0.0001981	0.99965	-0.0529951	0.85266		0	0	0	0	0	f(B6xCAST)-cM/Mb	L
	f(CASTxB6)-cM/Mb	-0.0414421	0.6095	-0.0627531	0.6378	-0.162061	0.48472	-0.228661	0.42554		0	0	0	0	0	f(CASTxB6)-cM/Mb	L
	m(B6xCAST)-cM/Mb	-0.0924621	0.23057	-0.0714021	0.69767	-0.179179	0.40895	-0.178421	0.47351		0	0	0	0	0	m(B6xCAST)-cM/Mb	L
	m(CASTxB6)-cM/Mb	-0.0757131	0.43984	0.0215421	0.90311	0.0646231	0.84078	0.0494151	0.84737		0	0	0	0	0	m(CASTxB6)-cM/Mb	L
	female-cM/Mb	-0.0522951	0.4905	0.0065811	0.96158	-0.0889391	0.76596	-0.152379	0.5825		0	0	0	0	0	female-cM/Mb	L
	male-cM/Mb	-0.0877551	0.27462	-0.0271611	0.86075	-0.0615041	0.81945	-0.0688391	0.78579		0	0	0	0	0	male-cM/Mb	L
	ave-cM/Mb	-0.0791731	0.315	-0.0159461	0.92307	-0.0735361	0.82037	-0.0989561	0.73855		0	0	0	0	0	ave-cM/Mb	L
3-11.7	f(B6xCAST)-cM	nan10	1e-07	nan10	1e-07	nan10	1e-07	nan10	1e-07		111111	111111	111111	111111	444444	f(B6xCAST)-cM	o
	f(CASTxB6)-cM	nan10	1e-07	nan10	1e-07	nan10	1e-07	nan10	1e-07		111111	111111	111111	111111	444444	f(CASTxB6)-cM	o
	m(B6xCAST)-cM	nan10	1e-07	nan10	1e-07	nan10	1e-07	nan10	1e-07		111111	111111	111111	111111	444444	m(B6xCAST)-cM	o
	m(CASTxB6)-cM	nan10	1e-07	nan10	1e-07	nan10	1e-07	nan10	1e-07		111111	111111	111111	111111	444444	m(CASTxB6)-cM	o
	female-cM	nan10	1e-07	nan10	1e-07	nan10	1e-07	nan10	1e-07		111111	111111	111111	111111	444444	female-cM	o
	male-cM	nan10	1e-07	nan10	1e-07	nan10	1e-07	nan10	1e-07		111111	111111	111111	111111	444444	male-cM	o
	ave-cM	nan10	1e-07	nan10	1e-07	nan10	1e-07	nan10	1e-07		111111	111111	111111	111111	444444	ave-cM	o
3-11.7	f(B6xCAST)-cM/Mb	nan10	1e-07	nan10	1e-07	nan10	1e-07	nan10	1e-07		111111	111111	111111	111111	444444	f(B6xCAST)-cM/Mb	o
	f(CASTxB6)-cM/Mb	nan10	1e-07	nan10	1e-07	nan10	1e-07	nan10	1e-07		111111	111111	111111	111111	444444	f(CASTxB6)-cM/Mb	o
	m(B6xCAST)-cM/Mb	nan10	1e-07	nan10	1e-07	nan10	1e-07	nan10	1e-07		111111	111111	111111	111111	444444	m(B6xCAST)-cM/Mb	o
	m(CASTxB6)-cM/Mb	nan10	1e-07	nan10	1e-07	nan10	1e-07	nan10	1e-07		111111	111111	111111	111111	444444	m(CASTxB6)-cM/Mb	o
	female-cM/Mb	nan10	1e-07	nan10	1e-07	nan10	1e-07	nan10	1e-07		111111	111111	111111	111111	444444	female-cM/Mb	o
	male-cM/Mb	nan10	1e-07	nan10	1e-07	nan10	1e-07	nan10	1e-07		111111	111111	111111	111111	444444	male-cM/Mb	o
	ave-cM/Mb	nan10	1e-07	nan10	1e-07	nan10	1e-07	nan10	1e-07		111111	111111	111111	111111	444444	ave-cM/Mb	o
11.7-21.7	f(B6xCAST)-cM	0.0261301	0.75918	0.0414701	0.73742	-0.0208811	0.92145	-0.103478	0.64128		0	0	0	0	0	f(B6xCAST)-cM	p
	f(CASTxB6)-cM	-0.0130751	0.88287	-0.0495931	0.72543	-0.149581	0.52878	-0.264024	0.22379		0	0	0	0	0	f(CASTxB6)-cM	p
	m(B6xCAST)-cM	-0.0410481	0.51295	-0.0534161	0.6843	-0.101525	0.53568	-0.186374	0.31282		0	0	0	0	0	m(B6xCAST)-cM	p
	m(CASTxB6)-cM	-0.0349101	0.70477	-0.0812461	0.49924	-0.161228	0.353	-0.202298	0.29304		0	0	0	0	0	m(CASTxB6)-cM	p
	female-cM	0.0059241	0.94705	-0.0049151	0.97038	-0.0889651	0.70688	-0.189314	0.38244		0	0	0	0	0	female-cM	p
	male-cM	-0.0390431	0.6041	-0.0670051	0.59221	-0.128906	0.4471	-0.195022	0.30557		0	0	0	0	0	male-cM	p
	ave-cM	-0.0174231	0.86913	-0.0407161	0.77715	-0.128835	0.5986	-0.231851	0.30654		0	0	0	0	0	ave-cM	p
11.7-21.7	f(B6xCAST)-cM/Mb	0.0261301	0.75742	0.0414711	0.73988	-0.0208811	0.9232	-0.103478	0.64427		0	0	0	0	0	f(B6xCAST)-cM/Mb	p
	f(CASTxB6)-cM/Mb	-0.0130751	0.88415	-0.0495931	0.72566	-0.149581	0.5285	-0.264024	0.22539		0	0	0	0	0	f(CASTxB6)-cM/Mb	p
	m(B6xCAST)-cM/Mb	-0.0410481	0.51382	-0.0534161	0.6848	-0.101525	0.5359	-0.186374	0.31431		0	0	0	0	0	m(B6xCAST)-cM/Mb	p
	m(CASTxB6)-cM/Mb	-0.0349111	0.70718	-0.0812461	0.50055	-0.161228	0.35391	-0.202298	0.29297		0	0	0	0	0	m(CASTxB6)-cM/Mb	p
	female-cM/Mb	0.0059241	0.94737	-0.0049151	0.96949	-0.0889651	0.70537	-0.189314	0.38379		0	0	0	0	0	female-cM/Mb	p
	male-cM/Mb	-0.0390441	0.60685	-0.0670051	0.59549	-0.128906	0.4438	-0.195022	0.3019		0	0	0	0	0	male-cM/Mb	p
	ave-cM/Mb	-0.0174231	0.8697	-0.0407151	0.77835	-0.128835	0.60138	-0.231851	0.30661		0	0	0	0	0	ave-cM/Mb	p
21.7-31.7	f(B6xCAST)-cM	-0.102805	0.2093	-0.213865	0.1079	-0.220555	0.24855	-0.224749	0.29		0	0	0	0	0	f(B6xCAST)-cM	q
	f(CASTxB6)-cM	-0.0968611	0.12969	-0.148955	0.21986	-0.142175	0.48034	-0.0861701	0.7067		0	0	0	0	0	f(CASTxB6)-cM	q
	m(B6xCAST)-cM	0.238074	0.0362001	0.221854	0.0880701	0.492488	0.0246001	0.587677	0.0199901		111111	0	111111	111111	333333	m(B6xCAST)-cM	q
	m(CASTxB6)-cM	0.0044901	0.97037	0.0129031	0.94044	0.264938	0.15269	0.355178	0.10398		0	0	0	0	0	m(CASTxB6)-cM	q
	female-cM	-0.104688	0.15102	-0.188567	0.13681	-0.182909	0.32603	-0.1544	0.41789		0	0	0	0	0	female-cM	q
	male-cM	0.140334	0.10259	0.140094	0.3132	0.445578	0.0317001	0.56095	0.0177201		0	0	111111	111111	222222	male-cM	q
	ave-cM	-0.0029361	0.97575	-0.0526871	0.7412	0.0967931	0.64131	0.148184	0.46511		0	0	0	0	0	ave-cM	q
21.7-31.7	f(B6xCAST)-cM/Mb	-0.102805	0.20863	-0.213865	0.10735	-0.220555	0.25067	-0.224749	0.28606		0	0	0	0	0	f(B6xCAST)-cM/Mb	q
	f(CASTxB6)-cM/Mb	-0.0968611	0.13498	-0.148955	0.21925	-0.142175	0.47992	-0.0861701	0.70642		0	0	0	0	0	f(CASTxB6)-cM/Mb	q
	m(B6xCAST)-cM/Mb	0.238073	0.0370401	0.221853	0.0855601	0.492488	0.0246501	0.587677	0.0195801		111111	0	111111	111111	333333	m(B6xCAST)-cM/Mb	q
	m(CASTxB6)-cM/Mb	0.0044901	0.96945	0.0129041	0.93967	0.264938	0.14824	0.355178	0.10427		0	0	0	0	0	m(CASTxB6)-cM/Mb	q
	female-cM/Mb	-0.104688	0.15118	-0.188567	0.1359	-0.182909	0.32367	-0.1544	0.41888		0	0	0	0	0	female-cM/Mb	q
	male-cM/Mb	0.140333	0.10307	0.140094	0.31258	0.445579	0.0301801	0.56095	0.0181901		0	0	111111	111111	222222	male-cM/Mb	q
	ave-cM/Mb	-0.0029361	0.97561	-0.0526871	0.74128	0.0967931	0.64343	0.148184	0.46624		0	0	0	0	0	ave-cM/Mb	q
31.7-41.7	f(B6xCAST)-cM	-0.0290761	0.63785	-0.0342531	0.75129	-0.0701691	0.77502	0.117511	0.63424		0	0	0	0	0	f(B6xCAST)-cM	r
	f(CASTxB6)-cM	0.0485341	0.3777	0.0021841	0.98578	-0.0824291	0.68285	0.208631	0.33481		0	0	0	0	0	f(CASTxB6)-cM	r
	m(B6xCAST)-cM	0.358457	0.0137401	0.350355	0.0317101	0.305306	0.0795001	0.488313	0.0455001		111111	111111	0	111111	333333	m(B6xCAST)-cM	r
	m(CASTxB6)-cM	0.111118	0.0866101	0.0640871	0.67532	0.0254061	0.89693	0.372527	0.0848901		0	0	0	0	0	m(CASTxB6)-cM	r
	female-cM	0.0089901	0.91504	-0.0172191	0.88196	-0.0782151	0.73553	0.166077	0.44066		0	0	0	0	0	female-cM	r
	male-cM	0.249262	0.0302501	0.215918	0.0859501	0.177175	0.48259	0.446423	0.0374901		111111	0	0	111111	222222	male-cM	r
	ave-cM	0.119798	0.0874101	0.0940651	0.39558	0.0481571	0.85191	0.319431	0.12061		0	0	0	0	0	ave-cM	r
31.7-41.7	f(B6xCAST)-cM/Mb	-0.0290761	0.63585	-0.0342541	0.75112	-0.0701691	0.77454	0.117511	0.63569		0	0	0	0	0	f(B6xCAST)-cM/Mb	r
	f(CASTxB6)-cM/Mb	0.0485341	0.37542	0.0021841	0.98467	-0.0824291	0.68216	0.208631	0.33681		0	0	0	0	0	f(CASTxB6)-cM/Mb	r
	m(B6xCAST)-cM/Mb	0.358456	0.0181901	0.350354	0.0326301	0.305307	0.0763001	0.488313	0.0455601		111111	111111	0	111111	333333	m(B6xCAST)-cM/Mb	r
	m(CASTxB6)-cM/Mb	0.111118	0.0865701	0.0640871	0.67274	0.0254061	0.90403	0.372527	0.0836601		0	0	0	0	0	m(CASTxB6)-cM/Mb	r
	female-cM/Mb	0.0089901	0.91461	-0.0172191	0.88136	-0.0782151	0.73562	0.166076	0.43903		0	0	0	0	0	female-cM/Mb	r
	male-cM/Mb	0.249262	0.0275001	0.215918	0.0819301	0.177175	0.48322	0.446423	0.0374901		111111	0	0	111111	222222	male-cM/Mb	r
	ave-cM/Mb	0.119798	0.0896101	0.0940651	0.39197	0.0481571	0.8537	0.31943	0.1215		0	0	0	0	0	ave-cM/Mb	r
41.7-51.7	f(B6xCAST)-cM	-0.0946921	0.18152	-0.185802	0.11623	-0.194831	0.36554	-0.197816	0.39132		0	0	0	0	0	f(B6xCAST)-cM	s
	f(CASTxB6)-cM	-0.0889001	0.17224	-0.176047	0.14118	-0.215316	0.29854	-0.279421	0.2413		0	0	0	0	0	f(CASTxB6)-cM	s
	m(B6xCAST)-cM	-0.0549861	0.21374	-0.0975771	0.3757	-0.0481601	0.93429	-0.0692521	0.85296		0	0	0	0	0	m(B6xCAST)-cM	s
	m(CASTxB6)-cM	-0.0599431	0.21682	-0.106832	0.32861	-0.0677221	0.84832	-0.0953321	0.80768		0	0	0	0	0	m(CASTxB6)-cM	s
	female-cM	-0.100218	0.16163	-0.197389	0.10015	-0.221711	0.3068	-0.255037	0.26899		0	0	0	0	0	female-cM	s
	male-cM	-0.0580121	0.19621	-0.103101	0.33774	-0.0588141	0.90301	-0.0833951	0.83952		0	0	0	0	0	male-cM	s
	ave-cM	-0.0797601	0.15625	-0.145374	0.16439	-0.121256	0.6081	-0.147825	0.58102		0	0	0	0	0	ave-cM	s
41.7-51.7	f(B6xCAST)-cM/Mb	-0.0946921	0.18885	-0.185802	0.11553	-0.194831	0.36753	-0.197817	0.39255		0	0	0	0	0	f(B6xCAST)-cM/Mb	s
	f(CASTxB6)-cM/Mb	-0.0889001	0.16065	-0.176046	0.14219	-0.215316	0.29712	-0.27942	0.23798		0	0	0	0	0	f(CASTxB6)-cM/Mb	s
	m(B6xCAST)-cM/Mb	-0.0549861	0.22278	-0.0975771	0.37838	-0.0481601	0.93312	-0.0692521	0.85126		0	0	0	0	0	m(B6xCAST)-cM/Mb	s
	m(CASTxB6)-cM/Mb	-0.0599431	0.22873	-0.106832	0.32925	-0.0677221	0.847	-0.0953321	0.80725		0	0	0	0	0	m(CASTxB6)-cM/Mb	s
	female-cM/Mb	-0.100218	0.15276	-0.197389	0.10199	-0.221711	0.30892	-0.255037	0.2715		0	0	0	0	0	female-cM/Mb	s
	male-cM/Mb	-0.0580121	0.1478	-0.103101	0.33705	-0.0588141	0.89949	-0.0833941	0.83823		0	0	0	0	0	male-cM/Mb	s
	ave-cM/Mb	-0.0797601	0.15634	-0.145374	0.16208	-0.121256	0.60675	-0.147825	0.58037		0	0	0	0	0	ave-cM/Mb	s
51.7-61.7	f(B6xCAST)-cM	-0.0446291	0.66174	-0.0994831	0.47078	-0.136455	0.52316	-0.16317	0.49935		0	0	0	0	0	f(B6xCAST)-cM	t
	f(CASTxB6)-cM	0.0206321	0.77033	-0.0624451	0.61227	-0.0976201	0.64907	-0.0889351	0.71264		0	0	0	0	0	f(CASTxB6)-cM	t
	m(B6xCAST)-cM	-0.0366901	0.61384	-0.0928681	0.47137	-0.117256	0.64	-0.10005	0.73905		0	0	0	0	0	m(B6xCAST)-cM	t
	m(CASTxB6)-cM	-0.0135091	0.8966	-0.0231921	0.89379	0.139242	0.55642	-0.0103281	0.96502		0	0	0	0	0	m(CASTxB6)-cM	t
	female-cM	-0.0040581	0.9589	-0.0819161	0.5114	-0.122703	0.56628	-0.132533	0.59091		0	0	0	0	0	female-cM	t
	male-cM	-0.0231841	0.80843	-0.0512861	0.76203	0.0471661	0.86786	-0.0470321	0.85158		0	0	0	0	0	male-cM	t
	ave-cM	-0.0180501	0.81713	-0.0681331	0.61596	-0.0144261	0.95203	-0.0931851	0.71666		0	0	0	0	0	ave-cM	t
51.7-61.7	f(B6xCAST)-cM/Mb	-0.0446301	0.6616	-0.0994841	0.47348	-0.136455	0.52651	-0.16317	0.50115		0	0	0	0	0	f(B6xCAST)-cM/Mb	t
	f(CASTxB6)-cM/Mb	0.0206321	0.77122	-0.0624451	0.61198	-0.0976201	0.65236	-0.0889361	0.71213		0	0	0	0	0	f(CASTxB6)-cM/Mb	t
	m(B6xCAST)-cM/Mb	-0.0366901	0.61637	-0.0928691	0.47209	-0.117257	0.6391	-0.10005	0.73777		0	0	0	0	0	m(B6xCAST)-cM/Mb	t
	m(CASTxB6)-cM/Mb	-0.0135101	0.89535	-0.0231921	0.89477	0.139242	0.55354	-0.0103281	0.96531		0	0	0	0	0	m(CASTxB6)-cM/Mb	t
	female-cM/Mb	-0.0040571	0.95849	-0.0819161	0.50824	-0.122703	0.56434	-0.132533	0.59074		0	0	0	0	0	female-cM/Mb	t
	male-cM/Mb	-0.0231841	0.80756	-0.0512861	0.76244	0.0471661	0.86811	-0.0470321	0.85222		0	0	0	0	0	male-cM/Mb	t
	ave-cM/Mb	-0.0180501	0.81458	-0.0681341	0.61445	-0.0144251	0.95067	-0.0931851	0.71477		0	0	0	0	0	ave-cM/Mb	t
61.7-71.7	f(B6xCAST)-cM	0.426382	0.0012601	0.44366	0.0004301	0.652695	0.0082501	0.60385	0.0078801		111111	111111	111111	111111	444444	f(B6xCAST)-cM	u
	f(CASTxB6)-cM	0.320346	0.0150601	0.262459	0.0621401	0.637814	0.0037701	0.636755	0.0015901		111111	0	111111	111111	333333	f(CASTxB6)-cM	u
	m(B6xCAST)-cM	0.120334	0.0220901	0.113188	0.0595901	0.195841	0.10311	0.174803	0.12242		111111	0	0	0	111111	m(B6xCAST)-cM	u
	m(CASTxB6)-cM	0.0323101	0.52898	0.0204981	0.74063	0.0937581	0.42345	0.0605511	0.70682		0	0	0	0	0	m(CASTxB6)-cM	u
	female-cM	0.400361	0.0121301	0.382971	0.0267501	0.683854	0.0269601	0.654171	0.0292401		111111	111111	111111	111111	444444	female-cM	u
	male-cM	0.0732531	0.0615601	0.0621211	0.28063	0.141268	0.11558	0.113935	0.29132		0	0	0	0	0	male-cM	u
	ave-cM	0.223872	0.0332501	0.20905	0.0705001	0.430844	0.0413801	0.399758	0.0551701		111111	0	111111	0	222222	ave-cM	u
61.7-71.7	f(B6xCAST)-cM/Mb	0.426381	0.0086101	0.443661	0.0129101	0.652695	0.0054101	0.60385	0.0173701		111111	111111	111111	111111	444444	f(B6xCAST)-cM/Mb	u
	f(CASTxB6)-cM/Mb	0.320346	0.0129601	0.262458	0.0610501	0.637814	0.0178801	0.636754	0.0025001		111111	0	111111	111111	333333	f(CASTxB6)-cM/Mb	u
	m(B6xCAST)-cM/Mb	0.120334	0.0185101	0.113188	0.0619101	0.195841	0.0814801	0.174803	0.12358		111111	0	0	0	111111	m(B6xCAST)-cM/Mb	u
	m(CASTxB6)-cM/Mb	0.0323101	0.52468	0.0204981	0.74014	0.0937581	0.44683	0.0605511	0.74151		0	0	0	0	0	m(CASTxB6)-cM/Mb	u
	female-cM/Mb	0.400361	0.0195601	0.382972	0.0354201	0.683854	0.0255201	0.654171	0.0276101		111111	111111	111111	111111	444444	female-cM/Mb	u
	male-cM/Mb	0.0732531	0.0630501	0.0621211	0.28595	0.141268	0.13959	0.113935	0.29308		0	0	0	0	0	male-cM/Mb	u
	ave-cM/Mb	0.223872	0.0316701	0.209049	0.0677101	0.430844	0.0463001	0.399758	0.0532901		111111	0	111111	0	222222	ave-cM/Mb	u
71.7-81.7	f(B6xCAST)-cM	-0.0346051	0.69819	-0.0509441	0.70136	0.0650561	0.75796	0.0243551	0.95562		0	0	0	0	0	f(B6xCAST)-cM	v
	f(CASTxB6)-cM	0.0071041	0.95586	-0.0633551	0.64648	-0.0160661	0.94879	0.207859	0.41347		0	0	0	0	0	f(CASTxB6)-cM	v
	m(B6xCAST)-cM	-0.0538921	0.18732	-0.0692221	0.66949	0.193814	0.17622	0.12306	0.57797		0	0	0	0	0	m(B6xCAST)-cM	v
	m(CASTxB6)-cM	0.0572791	0.50003	0.0450911	0.7219	0.0699331	0.70287	0.0831331	0.71857		0	0	0	0	0	m(CASTxB6)-cM	v
	female-cM	-0.0197841	0.83376	-0.0625871	0.70643	0.0293681	0.88182	0.120956	0.65682		0	0	0	0	0	female-cM	v
	male-cM	-0.0011291	0.9877	-0.0182791	0.93581	0.142924	0.41646	0.108606	0.658		0	0	0	0	0	male-cM	v
	ave-cM	-0.0139431	0.9394	-0.0518841	0.78236	0.0921521	0.66385	0.135822	0.60308		0	0	0	0	0	ave-cM	v
71.7-81.7	f(B6xCAST)-cM/Mb	-0.0346051	0.69946	-0.0509441	0.69854	0.0650561	0.75762	0.0243541	0.95654		0	0	0	0	0	f(B6xCAST)-cM/Mb	v
	f(CASTxB6)-cM/Mb	0.0071041	0.95871	-0.0633551	0.64395	-0.0160671	0.95108	0.207859	0.41613		0	0	0	0	0	f(CASTxB6)-cM/Mb	v
	m(B6xCAST)-cM/Mb	-0.0538921	0.39538	-0.0692221	0.67883	0.193814	0.17208	0.12306	0.6053		0	0	0	0	0	m(B6xCAST)-cM/Mb	v
	m(CASTxB6)-cM/Mb	0.0572781	0.49969	0.0450911	0.72201	0.0699331	0.69935	0.0831341	0.71698		0	0	0	0	0	m(CASTxB6)-cM/Mb	v
	female-cM/Mb	-0.0197841	0.83607	-0.0625871	0.70655	0.0293681	0.88239	0.120957	0.65598		0	0	0	0	0	female-cM/Mb	v
	male-cM/Mb	-0.0011281	0.9875	-0.0182791	0.93547	0.142923	0.41786	0.108606	0.65919		0	0	0	0	0	male-cM/Mb	v
	ave-cM/Mb	-0.0139441	0.93874	-0.0518831	0.78101	0.0921521	0.66053	0.135822	0.60204		0	0	0	0	0	ave-cM/Mb	v
81.7-91.7	f(B6xCAST)-cM	0.266853	0.0444601	0.191467	0.13736	0.0825751	0.73596	0.0398391	0.89071		111111	0	0	0	111111	f(B6xCAST)-cM	w
	f(CASTxB6)-cM	0.246338	0.0730101	0.195657	0.15053	0.0896111	0.83803	0.0100771	0.98588		0	0	0	0	0	f(CASTxB6)-cM	w
	m(B6xCAST)-cM	0.105893	0.16594	0.0616541	0.69591	0.123307	0.63359	-0.137794	0.64177		0	0	0	0	0	m(B6xCAST)-cM	w
	m(CASTxB6)-cM	0.0730261	0.13649	0.0198341	0.93979	0.108278	0.58757	-0.0809871	0.78436		0	0	0	0	0	m(CASTxB6)-cM	w
	female-cM	0.265228	0.0663101	0.20136	0.1443	0.0903561	0.74219	0.0241741	0.9574		0	0	0	0	0	female-cM	w
	male-cM	0.0867461	0.12318	0.0363081	0.86949	0.118529	0.59386	-0.103882	0.67473		0	0	0	0	0	male-cM	w
	ave-cM	0.20128	0.0745101	0.140879	0.19632	0.106797	0.66456	-0.0277781	0.91592		0	0	0	0	0	ave-cM	w
81.7-91.7	f(B6xCAST)-cM/Mb	0.266853	0.0449801	0.191467	0.13652	0.0825751	0.73659	0.0398391	0.89175		111111	0	0	0	111111	f(B6xCAST)-cM/Mb	w
	f(CASTxB6)-cM/Mb	0.246338	0.0740301	0.195657	0.14994	0.0896121	0.83818	0.0100771	0.9856		0	0	0	0	0	f(CASTxB6)-cM/Mb	w
	m(B6xCAST)-cM/Mb	0.105893	0.16698	0.0616551	0.69505	0.123307	0.63138	-0.137793	0.63933		0	0	0	0	0	m(B6xCAST)-cM/Mb	w
	m(CASTxB6)-cM/Mb	0.0730261	0.13754	0.0198341	0.94098	0.108278	0.59067	-0.0809871	0.78754		0	0	0	0	0	m(CASTxB6)-cM/Mb	w
	female-cM/Mb	0.265228	0.0674201	0.20136	0.14605	0.0903561	0.74165	0.0241741	0.95753		0	0	0	0	0	female-cM/Mb	w
	male-cM/Mb	0.0867461	0.12662	0.0363071	0.87133	0.118529	0.59637	-0.103882	0.67317		0	0	0	0	0	male-cM/Mb	w
	ave-cM/Mb	0.201281	0.0733701	0.140879	0.19499	0.106797	0.66478	-0.0277781	0.91381		0	0	0	0	0	ave-cM/Mb	w
91.7-101.7	f(B6xCAST)-cM	-0.0340971	0.74569	-0.0772921	0.61098	0.114931	0.57338	0.274039	0.22814		0	0	0	0	0	f(B6xCAST)-cM	x
	f(CASTxB6)-cM	-0.0155121	0.88833	-0.0856711	0.58543	0.0846321	0.70019	0.26642	0.27169		0	0	0	0	0	f(CASTxB6)-cM	x
	m(B6xCAST)-cM	0.0978561	0.1396	0.115435	0.41195	0.0771491	0.72142	0.228501	0.32166		0	0	0	0	0	m(B6xCAST)-cM	x
	m(CASTxB6)-cM	0.268073	0.0251801	0.377163	0.0154601	0.368626	0.0548601	0.58471	0.0364301		111111	111111	0	111111	333333	m(CASTxB6)-cM	x
	female-cM	-0.0258181	0.80466	-0.0865761	0.57351	0.108656	0.60707	0.281099	0.24339		0	0	0	0	0	female-cM	x
	male-cM	0.199522	0.0554901	0.273427	0.0512401	0.25347	0.21651	0.464544	0.0541001		0	0	0	0	0	male-cM	x
	ave-cM	0.104245	0.25703	0.105914	0.48699	0.217685	0.30476	0.450598	0.0317501		0	0	0	111111	111111	ave-cM	x
91.7-101.7	f(B6xCAST)-cM/Mb	-0.0340971	0.7465	-0.0772921	0.6081	0.114931	0.57702	0.274039	0.22932		0	0	0	0	0	f(B6xCAST)-cM/Mb	x
	f(CASTxB6)-cM/Mb	-0.0155121	0.88639	-0.0856711	0.58462	0.0846321	0.69762	0.26642	0.27097		0	0	0	0	0	f(CASTxB6)-cM/Mb	x
	m(B6xCAST)-cM/Mb	0.0978561	0.13843	0.115435	0.41549	0.0771491	0.72295	0.228501	0.31675		0	0	0	0	0	m(B6xCAST)-cM/Mb	x
	m(CASTxB6)-cM/Mb	0.268073	0.0234101	0.377164	0.0149001	0.368626	0.0559101	0.584711	0.0360501		111111	111111	0	111111	333333	m(CASTxB6)-cM/Mb	x
	female-cM/Mb	-0.0258181	0.80544	-0.0865751	0.57529	0.108656	0.60615	0.281099	0.24195		0	0	0	0	0	female-cM/Mb	x
	male-cM/Mb	0.199522	0.0549401	0.273427	0.0522601	0.25347	0.21913	0.464544	0.0541001		0	0	0	0	0	male-cM/Mb	x
	ave-cM/Mb	0.104245	0.25782	0.105914	0.48675	0.217685	0.30496	0.450598	0.0302701		0	0	0	111111	111111	ave-cM/Mb	x
101.7-111.7	f(B6xCAST)-cM	-0.0034321	0.95862	0.445581	0.0358101	0.380997	0.0825801	0.28118	0.16452		0	111111	0	0	111111	f(B6xCAST)-cM	y
	f(CASTxB6)-cM	-0.0129591	0.88862	0.254645	0.0729001	0.190456	0.35999	-0.0220421	0.92761		0	0	0	0	0	f(CASTxB6)-cM	y
	m(B6xCAST)-cM	0.0072211	0.9157	0.452215	0.0291501	0.389213	0.0733601	0.3128	0.117		0	111111	0	0	111111	m(B6xCAST)-cM	y
	m(CASTxB6)-cM	0.0168531	0.78653	0.492376	0.0325701	0.432188	0.0710701	0.36325	0.0963201		0	111111	0	0	111111	m(CASTxB6)-cM	y
	female-cM	-0.0074501	0.91988	0.3977	0.0377201	0.325405	0.0883301	0.170601	0.4817		0	111111	0	0	111111	female-cM	y
	male-cM	0.0127721	0.84692	0.489934	0.0323601	0.42914	0.0745701	0.356974	0.10185		0	111111	0	0	111111	male-cM	y
	ave-cM	0.0066231	0.91346	0.468662	0.0341801	0.405347	0.0776801	0.30609	0.12279		0	111111	0	0	111111	ave-cM	y
101.7-111.7	f(B6xCAST)-cM/Mb	-0.0034321	0.95974	0.445581	0.0362601	0.380997	0.0818401	0.281181	0.16454		0	111111	0	0	111111	f(B6xCAST)-cM/Mb	y
	f(CASTxB6)-cM/Mb	-0.0129591	0.88903	0.254645	0.0747701	0.190456	0.36044	-0.0220421	0.92699		0	0	0	0	0	f(CASTxB6)-cM/Mb	y
	m(B6xCAST)-cM/Mb	0.0072211	0.91286	0.452214	0.0301901	0.389213	0.0738501	0.3128	0.11731		0	111111	0	0	111111	m(B6xCAST)-cM/Mb	y
	m(CASTxB6)-cM/Mb	0.0168531	0.7859	0.492376	0.0309401	0.432188	0.0704601	0.36325	0.0966201		0	111111	0	0	111111	m(CASTxB6)-cM/Mb	y
	female-cM/Mb	-0.0074511	0.92002	0.3977	0.0360801	0.325405	0.0894801	0.170601	0.47561		0	111111	0	0	111111	female-cM/Mb	y
	male-cM/Mb	0.0127721	0.84703	0.489934	0.0322801	0.429141	0.0738001	0.356974	0.10229		0	111111	0	0	111111	male-cM/Mb	y
	ave-cM/Mb	0.0066231	0.91375	0.468662	0.0349601	0.405347	0.0772601	0.30609	0.12327		0	111111	0	0	111111	ave-cM/Mb	y
111.7-121.7	f(B6xCAST)-cM	-0.0574431	0.41585	0.0084561	0.95189	-0.0762561	0.72537	-0.102708	0.55659		0	0	0	0	0	f(B6xCAST)-cM	z
	f(CASTxB6)-cM	-0.0416521	0.55912	-0.0748801	0.6239	-0.158036	0.40269	-0.160143	0.30801		0	0	0	0	0	f(CASTxB6)-cM	z
	m(B6xCAST)-cM	-0.0881681	0.14951	-0.0785101	0.62744	-0.198073	0.33971	-0.205289	0.39731		0	0	0	0	0	m(B6xCAST)-cM	z
	m(CASTxB6)-cM	-0.0688751	0.44366	0.0003531	0.9988	0.0236881	0.92542	-0.0061181	0.98886		0	0	0	0	0	m(CASTxB6)-cM	z
	female-cM	-0.0497151	0.44617	-0.0396631	0.85716	-0.126588	0.59455	-0.13791	0.39586		0	0	0	0	0	female-cM	z
	male-cM	-0.0823511	0.28831	-0.0418151	0.82029	-0.0930731	0.70085	-0.108657	0.66784		0	0	0	0	0	male-cM	z
	ave-cM	-0.0731311	0.3073	-0.0449871	0.8366	-0.121174	0.66563	-0.134556	0.54476		0	0	0	0	0	ave-cM	z
111.7-121.7	f(B6xCAST)-cM/Mb	-0.0574431	0.4158	0.0084561	0.95174	-0.0762561	0.7241	-0.102708	0.55716		0	0	0	0	0	f(B6xCAST)-cM/Mb	z
	f(CASTxB6)-cM/Mb	-0.0416511	0.55905	-0.0748801	0.62575	-0.158036	0.40578	-0.160143	0.30854		0	0	0	0	0	f(CASTxB6)-cM/Mb	z
	m(B6xCAST)-cM/Mb	-0.0881681	0.21845	-0.0785101	0.62643	-0.198073	0.33873	-0.205288	0.39533		0	0	0	0	0	m(B6xCAST)-cM/Mb	z
	m(CASTxB6)-cM/Mb	-0.0688751	0.44317	0.0003531	0.99869	0.0236881	0.92387	-0.0061181	0.98871		0	0	0	0	0	m(CASTxB6)-cM/Mb	z
	female-cM/Mb	-0.0497141	0.44698	-0.0396631	0.8568	-0.126588	0.59052	-0.13791	0.39387		0	0	0	0	0	female-cM/Mb	z
	male-cM/Mb	-0.0823501	0.28847	-0.0418151	0.82204	-0.0930731	0.70212	-0.108657	0.66797		0	0	0	0	0	male-cM/Mb	z
	ave-cM/Mb	-0.0731311	0.30914	-0.0449871	0.83505	-0.121174	0.66365	-0.134556	0.54288		0	0	0	0	0	ave-cM/Mb	z

## Sheet: rRNA
section (Mbp position)	cross	100.cor	100.sig	200.cor	200.sig	400.cor	400.sig	500.cor	500.sig	111111	100kb	200kb	400kb	500kb	SUM	cross	section
3-13	f(B6xCAST)-cM	-0.0915201	0.28878	-0.164905	0.22287	-0.292378	0.13078	-0.260934	0.26377		0	0	0	0	0	f(B6xCAST)-cM	A
	f(CASTxB6)-cM	-0.0388571	0.65105	-0.0312381	0.83713	-0.0515651	0.76439	0.0370251	0.88328		0	0	0	0	0	f(CASTxB6)-cM	A
	m(B6xCAST)-cM	-0.0916951	0.29527	-0.105673	0.35853	-0.202348	0.30548	-0.222603	0.33694		0	0	0	0	0	m(B6xCAST)-cM	A
	m(CASTxB6)-cM	-0.0042371	0.96959	-0.0060541	0.96879	-0.0428841	0.84769	-0.0256071	0.9227		0	0	0	0	0	m(CASTxB6)-cM	A
	female-cM	-0.0631761	0.45676	-0.0919791	0.52745	-0.158281	0.38491	-0.0983641	0.69256		0	0	0	0	0	female-cM	A
	male-cM	-0.0549231	0.57217	-0.0636331	0.63469	-0.137865	0.54079	-0.144726	0.55857		0	0	0	0	0	male-cM	A
	ave-cM	-0.0651811	0.45751	-0.0876611	0.55384	-0.161769	0.4281	-0.122296	0.62036		0	0	0	0	0	ave-cM	A
3-13	f(B6xCAST)-cM/Mb	-0.0915201	0.284	-0.164905	0.22249	-0.292378	0.1309	-0.260934	0.26351		0	0	0	0	0	f(B6xCAST)-cM/Mb	A
	f(CASTxB6)-cM/Mb	-0.0388571	0.65163	-0.0312381	0.83654	-0.0515651	0.76603	0.0370251	0.8848		0	0	0	0	0	f(CASTxB6)-cM/Mb	A
	m(B6xCAST)-cM/Mb	-0.0916951	0.29556	-0.105673	0.3545	-0.202347	0.30459	-0.222602	0.33462		0	0	0	0	0	m(B6xCAST)-cM/Mb	A
	m(CASTxB6)-cM/Mb	-0.0042371	0.96998	-0.0060541	0.96865	-0.0428831	0.85034	-0.0256071	0.92373		0	0	0	0	0	m(CASTxB6)-cM/Mb	A
	female-cM/Mb	-0.0631751	0.45534	-0.0919791	0.5273	-0.158281	0.38081	-0.0983641	0.69271		0	0	0	0	0	female-cM/Mb	A
	male-cM/Mb	-0.0549231	0.57807	-0.0636331	0.63777	-0.137865	0.53951	-0.144725	0.56019		0	0	0	0	0	male-cM/Mb	A
	ave-cM/Mb	-0.0651811	0.45833	-0.0876611	0.55221	-0.161769	0.42609	-0.122296	0.61743		0	0	0	0	0	ave-cM/Mb	A
13-23	f(B6xCAST)-cM	-0.0388361	0.52365	-0.0944721	0.23004	-0.0803351	0.69572	-0.0793081	0.68574		0	0	0	0	0	f(B6xCAST)-cM	B
	f(CASTxB6)-cM	-0.0561681	0.14463	-0.0766031	0.5164	-0.0853761	0.73315	-0.111147	0.61305		0	0	0	0	0	f(CASTxB6)-cM	B
	m(B6xCAST)-cM	0.0335461	0.63882	0.116177	0.13376	0.217419	0.11015	0.214327	0.14197		0	0	0	0	0	m(B6xCAST)-cM	B
	m(CASTxB6)-cM	-0.0255291	0.79603	-0.0455811	0.72924	-0.0021791	0.99129	-0.0268601	0.94503		0	0	0	0	0	m(CASTxB6)-cM	B
	female-cM	-0.0481231	0.32422	-0.0861461	0.36468	-0.0839091	0.72127	-0.0971461	0.6587		0	0	0	0	0	female-cM	B
	male-cM	0.0081041	0.93917	0.0439891	0.77301	0.125233	0.32522	0.107856	0.60829		0	0	0	0	0	male-cM	B
	ave-cM	-0.0243831	0.78098	-0.0256361	0.85303	0.0324111	0.91181	0.0202911	0.92272		0	0	0	0	0	ave-cM	B
13-23	f(B6xCAST)-cM/Mb	-0.0388361	0.52757	-0.0944721	0.23307	-0.0803351	0.69452	-0.0793091	0.68452		0	0	0	0	0	f(B6xCAST)-cM/Mb	B
	f(CASTxB6)-cM/Mb	-0.0561681	0.13504	-0.0766031	0.51962	-0.0853761	0.7336	-0.111147	0.61559		0	0	0	0	0	f(CASTxB6)-cM/Mb	B
	m(B6xCAST)-cM/Mb	0.0335461	0.64122	0.116177	0.13369	0.217419	0.11478	0.214327	0.14171		0	0	0	0	0	m(B6xCAST)-cM/Mb	B
	m(CASTxB6)-cM/Mb	-0.0255291	0.79409	-0.0455811	0.72715	-0.0021791	0.99201	-0.0268601	0.94708		0	0	0	0	0	m(CASTxB6)-cM/Mb	B
	female-cM/Mb	-0.0481231	0.32488	-0.0861461	0.36307	-0.0839091	0.72297	-0.0971461	0.65443		0	0	0	0	0	female-cM/Mb	B
	male-cM/Mb	0.0081041	0.93778	0.0439891	0.77489	0.125233	0.32691	0.107856	0.61172		0	0	0	0	0	male-cM/Mb	B
	ave-cM/Mb	-0.0243831	0.78052	-0.0256361	0.8515	0.0324111	0.91077	0.0202911	0.92523		0	0	0	0	0	ave-cM/Mb	B
23-33	f(B6xCAST)-cM	-0.0990311	0.18452	0.0397521	0.81222	0.255347	0.16055	0.301512	0.15952		0	0	0	0	0	f(B6xCAST)-cM	C
	f(CASTxB6)-cM	-0.0864341	0.15199	0.129545	0.27915	0.237597	0.14475	0.248267	0.17146		0	0	0	0	0	f(CASTxB6)-cM	C
	m(B6xCAST)-cM	0.182164	0.0638401	0.153304	0.12377	0.395582	0.0480301	0.391742	0.0669501		0	0	111111	0	111111	m(B6xCAST)-cM	C
	m(CASTxB6)-cM	-0.0184401	0.88076	0.154467	0.16975	0.45999	0.0284201	0.404028	0.0681801		0	0	111111	0	111111	m(CASTxB6)-cM	C
	female-cM	-0.0970301	0.1377	0.0911561	0.49514	0.25251	0.13927	0.280292	0.14933		0	0	0	0	0	female-cM	C
	male-cM	0.0881421	0.23699	0.163516	0.14132	0.45265	0.0232401	0.421257	0.0546001		0	0	111111	0	111111	male-cM	C
	ave-cM	-0.0179011	0.85328	0.136954	0.29091	0.384103	0.0633301	0.377492	0.0839401		0	0	0	0	0	ave-cM	C
23-33	f(B6xCAST)-cM/Mb	-0.0990311	0.14382	0.0397521	0.80871	0.255348	0.16033	0.301512	0.15876		0	0	0	0	0	f(B6xCAST)-cM/Mb	C
	f(CASTxB6)-cM/Mb	-0.0864341	0.17208	0.129545	0.28124	0.237597	0.14659	0.248266	0.17084		0	0	0	0	0	f(CASTxB6)-cM/Mb	C
	m(B6xCAST)-cM/Mb	0.182164	0.0618201	0.153304	0.124	0.395581	0.0474601	0.391742	0.0671801		0	0	111111	0	111111	m(B6xCAST)-cM/Mb	C
	m(CASTxB6)-cM/Mb	-0.0184391	0.88149	0.154467	0.16986	0.45999	0.0280801	0.404028	0.0683801		0	0	111111	0	111111	m(CASTxB6)-cM/Mb	C
	female-cM/Mb	-0.0970301	0.14029	0.0911561	0.49484	0.25251	0.14064	0.280291	0.14975		0	0	0	0	0	female-cM/Mb	C
	male-cM/Mb	0.0881421	0.23755	0.163516	0.14011	0.45265	0.0242101	0.421257	0.0544701		0	0	111111	0	111111	male-cM/Mb	C
	ave-cM/Mb	-0.0179011	0.85118	0.136954	0.29235	0.384103	0.0643701	0.377492	0.0855201		0	0	0	0	0	ave-cM/Mb	C
33-43	f(B6xCAST)-cM	0.724217	0.0013601	0.695885	0.0040801	0.655065	0.0188401	0.595594	0.0246201		111111	111111	111111	111111	444444	f(B6xCAST)-cM	D
	f(CASTxB6)-cM	0.44846	0.0131301	0.424941	0.0429001	0.408913	0.0905701	0.318033	0.12869		111111	111111	0	0	222222	f(CASTxB6)-cM	D
	m(B6xCAST)-cM	0.720523	0.0029001	0.68315	0.0073301	0.650745	0.0191001	0.570237	0.0383901		111111	111111	111111	111111	444444	m(B6xCAST)-cM	D
	m(CASTxB6)-cM	0.540298	0.0015201	0.515227	0.0054101	0.415735	0.0547801	0.32224	0.14564		111111	111111	0	0	222222	m(CASTxB6)-cM	D
	female-cM	0.608232	0.0011801	0.580327	0.0050001	0.548947	0.0165301	0.466571	0.0744001		111111	111111	111111	0	333333	female-cM	D
	male-cM	0.662578	0.0018401	0.625953	0.0053201	0.562241	0.0174401	0.461413	0.0802701		111111	111111	111111	0	333333	male-cM	D
	ave-cM	0.6538	0.0014701	0.619393	0.0052501	0.573586	0.0170601	0.480052	0.0553001		111111	111111	111111	0	333333	ave-cM	D
33-43	f(B6xCAST)-cM/Mb	0.724217	0.0015501	0.695884	0.0040501	0.655065	0.0188901	0.595594	0.0257701		111111	111111	111111	111111	444444	f(B6xCAST)-cM/Mb	D
	f(CASTxB6)-cM/Mb	0.44846	0.0137501	0.424941	0.0438001	0.408913	0.0900401	0.318033	0.12972		111111	111111	0	0	222222	f(CASTxB6)-cM/Mb	D
	m(B6xCAST)-cM/Mb	0.720523	0.0027301	0.68315	0.0077001	0.650744	0.0187701	0.570237	0.0389601		111111	111111	111111	111111	444444	m(B6xCAST)-cM/Mb	D
	m(CASTxB6)-cM/Mb	0.540298	0.0015101	0.515227	0.0050001	0.415735	0.0552301	0.32224	0.14642		111111	111111	0	0	222222	m(CASTxB6)-cM/Mb	D
	female-cM/Mb	0.608231	0.0015601	0.580327	0.0051601	0.548947	0.0164401	0.466571	0.0736901		111111	111111	111111	0	333333	female-cM/Mb	D
	male-cM/Mb	0.662578	0.0018101	0.625953	0.0055101	0.562241	0.0174801	0.461413	0.0801201		111111	111111	111111	0	333333	male-cM/Mb	D
	ave-cM/Mb	0.6538	0.0016101	0.619392	0.0050101	0.573586	0.0166601	0.480052	0.0559501		111111	111111	111111	0	333333	ave-cM/Mb	D
43-53	f(B6xCAST)-cM	0.182202	0.0650901	0.265744	0.0578201	0.385149	0.0500301	0.0210211	0.92827		0	0	0	0	0	f(B6xCAST)-cM	E
	f(CASTxB6)-cM	-0.0430091	0.64161	0.21197	0.0994101	0.159253	0.45753	0.0383551	0.88267		0	0	0	0	0	f(CASTxB6)-cM	E
	m(B6xCAST)-cM	-0.0177021	0.9021	-0.0622851	0.77169	-0.173752	0.4495	-0.234748	0.3349		0	0	0	0	0	m(B6xCAST)-cM	E
	m(CASTxB6)-cM	-0.0455711	0.61245	-0.105959	0.43467	-0.175587	0.40897	-0.294257	0.16936		0	0	0	0	0	m(CASTxB6)-cM	E
	female-cM	0.0704301	0.46066	0.261826	0.0556601	0.287801	0.16638	0.0322841	0.89347		0	0	0	0	0	female-cM	E
	male-cM	-0.0325551	0.76208	-0.0858491	0.61245	-0.1755	0.42465	-0.267671	0.21932		0	0	0	0	0	male-cM	E
	ave-cM	0.0005301	0.99589	0.0250881	0.88621	-0.0369051	0.86484	-0.187387	0.4309		0	0	0	0	0	ave-cM	E
43-53	f(B6xCAST)-cM/Mb	0.182202	0.0655601	0.265744	0.0578001	0.385148	0.0496901	0.0210221	0.92742		0	0	111111	0	111111	f(B6xCAST)-cM/Mb	E
	f(CASTxB6)-cM/Mb	-0.0430091	0.64088	0.21197	0.0970001	0.159253	0.45606	0.0383551	0.88069		0	0	0	0	0	f(CASTxB6)-cM/Mb	E
	m(B6xCAST)-cM/Mb	-0.0177021	0.90177	-0.0622851	0.77238	-0.173752	0.44938	-0.234748	0.33317		0	0	0	0	0	m(B6xCAST)-cM/Mb	E
	m(CASTxB6)-cM/Mb	-0.0455711	0.61149	-0.105959	0.43129	-0.175587	0.40814	-0.294258	0.17157		0	0	0	0	0	m(CASTxB6)-cM/Mb	E
	female-cM/Mb	0.0704301	0.46398	0.261825	0.0550801	0.287801	0.1664	0.0322841	0.89347		0	0	0	0	0	female-cM/Mb	E
	male-cM/Mb	-0.0325551	0.76002	-0.0858491	0.61113	-0.1755	0.42206	-0.267671	0.22054		0	0	0	0	0	male-cM/Mb	E
	ave-cM/Mb	0.0005301	0.99613	0.0250881	0.88782	-0.0369051	0.86566	-0.187387	0.43108		0	0	0	0	0	ave-cM/Mb	E
53-63	f(B6xCAST)-cM	0.0406311	0.69192	-0.0306521	0.82576	-0.0886851	0.67947	0.0364481	0.88055		0	0	0	0	0	f(B6xCAST)-cM	F
	f(CASTxB6)-cM	-0.0281991	0.66235	-0.102845	0.34696	-0.156871	0.43986	-0.0702861	0.77526		0	0	0	0	0	f(CASTxB6)-cM	F
	m(B6xCAST)-cM	-0.0133651	0.86328	-0.0772821	0.5677	-0.139933	0.51497	0.0164161	0.95363		0	0	0	0	0	m(B6xCAST)-cM	F
	m(CASTxB6)-cM	0.0470751	0.5972	0.0165761	0.95384	-0.0058951	0.98216	0.252028	0.29212		0	0	0	0	0	m(CASTxB6)-cM	F
	female-cM	-0.0016911	0.98233	-0.0760871	0.52367	-0.134749	0.52078	-0.0226571	0.9306		0	0	0	0	0	female-cM	F
	male-cM	0.0226601	0.79844	-0.0211041	0.92922	-0.0604681	0.78626	0.157206	0.52738		0	0	0	0	0	male-cM	F
	ave-cM	0.0175121	0.82621	-0.0411681	0.80967	-0.0966721	0.67906	0.128117	0.62219		0	0	0	0	0	ave-cM	F
53-63	f(B6xCAST)-cM/Mb	0.0406311	0.68942	-0.0306521	0.82611	-0.0886851	0.67743	0.0364481	0.88029		0	0	0	0	0	f(B6xCAST)-cM/Mb	F
	f(CASTxB6)-cM/Mb	-0.0281991	0.66383	-0.102845	0.34806	-0.15687	0.44001	-0.0702871	0.77178		0	0	0	0	0	f(CASTxB6)-cM/Mb	F
	m(B6xCAST)-cM/Mb	-0.0133651	0.86592	-0.0772821	0.5705	-0.139933	0.52085	0.0164161	0.95384		0	0	0	0	0	m(B6xCAST)-cM/Mb	F
	m(CASTxB6)-cM/Mb	0.0470751	0.59968	0.0165761	0.95349	-0.0058941	0.98185	0.252028	0.29447		0	0	0	0	0	m(CASTxB6)-cM/Mb	F
	female-cM/Mb	-0.0016901	0.98212	-0.0760871	0.52528	-0.134749	0.52165	-0.0226561	0.93248		0	0	0	0	0	female-cM/Mb	F
	male-cM/Mb	0.0226601	0.79806	-0.0211041	0.9292	-0.0604671	0.78803	0.157206	0.52508		0	0	0	0	0	male-cM/Mb	F
	ave-cM/Mb	0.0175121	0.82548	-0.0411681	0.80908	-0.0966721	0.67747	0.128117	0.62085		0	0	0	0	0	ave-cM/Mb	F
63-73	f(B6xCAST)-cM	0.0043791	0.96875	-0.0768991	0.60851	-0.235703	0.24979	-0.21208	0.3796		0	0	0	0	0	f(B6xCAST)-cM	G
	f(CASTxB6)-cM	-0.0401561	0.68261	-0.0956111	0.51457	-0.233479	0.25248	-0.0004521	0.99859		0	0	0	0	0	f(CASTxB6)-cM	G
	m(B6xCAST)-cM	-0.0261861	0.78798	-0.0983611	0.5041	-0.220639	0.27608	-0.23561	0.31637		0	0	0	0	0	m(B6xCAST)-cM	G
	m(CASTxB6)-cM	-0.0440901	0.64265	-0.0233871	0.87401	-0.0920211	0.69945	-0.216041	0.36061		0	0	0	0	0	m(CASTxB6)-cM	G
	female-cM	-0.0189941	0.85298	-0.0938221	0.52267	-0.252337	0.21054	-0.120834	0.6191		0	0	0	0	0	female-cM	G
	male-cM	-0.0365451	0.70033	-0.0687591	0.64102	-0.17043	0.4273	-0.242022	0.29727		0	0	0	0	0	male-cM	G
	ave-cM	-0.0281391	0.77465	-0.0891541	0.55661	-0.234421	0.2449	-0.180273	0.4573		0	0	0	0	0	ave-cM	G
63-73	f(B6xCAST)-cM/Mb	0.0043791	0.96846	-0.0768991	0.60807	-0.235703	0.2504	-0.21208	0.38198		0	0	0	0	0	f(B6xCAST)-cM/Mb	G
	f(CASTxB6)-cM/Mb	-0.0401561	0.68231	-0.0956101	0.51362	-0.233479	0.25124	-0.0004521	0.99854		0	0	0	0	0	f(CASTxB6)-cM/Mb	G
	m(B6xCAST)-cM/Mb	-0.0261861	0.78953	-0.0983611	0.50101	-0.220638	0.27693	-0.23561	0.31663		0	0	0	0	0	m(B6xCAST)-cM/Mb	G
	m(CASTxB6)-cM/Mb	-0.0440891	0.64156	-0.0233861	0.87584	-0.0920221	0.69928	-0.216041	0.36124		0	0	0	0	0	m(CASTxB6)-cM/Mb	G
	female-cM/Mb	-0.0189951	0.85298	-0.0938221	0.52644	-0.252338	0.2088	-0.120834	0.61738		0	0	0	0	0	female-cM/Mb	G
	male-cM/Mb	-0.0365451	0.69908	-0.0687591	0.6412	-0.17043	0.4246	-0.242021	0.29998		0	0	0	0	0	male-cM/Mb	G
	ave-cM/Mb	-0.0281381	0.77601	-0.0891531	0.55739	-0.23442	0.24145	-0.180272	0.45877		0	0	0	0	0	ave-cM/Mb	G
73-83	f(B6xCAST)-cM	-0.0570671	0.38607	-0.0772731	0.52731	-0.160848	0.35046	0.0569701	0.78678		0	0	0	0	0	f(B6xCAST)-cM	H
	f(CASTxB6)-cM	-0.0925341	0.32058	-0.156254	0.21598	-0.193392	0.28105	-0.141824	0.58101		0	0	0	0	0	f(CASTxB6)-cM	H
	m(B6xCAST)-cM	-0.0554671	0.18769	-0.111582	0.3063	-0.178826	0.1277	-0.254952	0.14649		0	0	0	0	0	m(B6xCAST)-cM	H
	m(CASTxB6)-cM	-0.0644851	0.20456	-0.116223	0.26916	-0.173564	0.29443	-0.205953	0.27312		0	0	0	0	0	m(CASTxB6)-cM	H
	female-cM	-0.0779531	0.25743	-0.122132	0.32088	-0.18108	0.27041	-0.0345711	0.88664		0	0	0	0	0	female-cM	H
	male-cM	-0.0618911	0.25555	-0.117711	0.23809	-0.181658	0.20092	-0.237739	0.17142		0	0	0	0	0	male-cM	H
	ave-cM	-0.0841691	0.19795	-0.143003	0.23534	-0.212342	0.21249	-0.138591	0.5708		0	0	0	0	0	ave-cM	H
73-83	f(B6xCAST)-cM/Mb	-0.0570671	0.36957	-0.0772731	0.52457	-0.160848	0.35244	0.0569701	0.78561		0	0	0	0	0	f(B6xCAST)-cM/Mb	H
	f(CASTxB6)-cM/Mb	-0.0925341	0.32517	-0.156253	0.21833	-0.193393	0.28381	-0.141824	0.57843		0	0	0	0	0	f(CASTxB6)-cM/Mb	H
	m(B6xCAST)-cM/Mb	-0.0554671	0.35279	-0.111582	0.38989	-0.178826	0.19466	-0.254952	0.13351		0	0	0	0	0	m(B6xCAST)-cM/Mb	H
	m(CASTxB6)-cM/Mb	-0.0644851	0.1809	-0.116222	0.26764	-0.173564	0.29364	-0.205953	0.27235		0	0	0	0	0	m(CASTxB6)-cM/Mb	H
	female-cM/Mb	-0.0779531	0.25231	-0.122133	0.31604	-0.18108	0.26952	-0.0345721	0.88577		0	0	0	0	0	female-cM/Mb	H
	male-cM/Mb	-0.0618911	0.14314	-0.117711	0.23544	-0.181658	0.19908	-0.237739	0.16989		0	0	0	0	0	male-cM/Mb	H
	ave-cM/Mb	-0.0841681	0.19924	-0.143004	0.23544	-0.212342	0.2124	-0.13859	0.57051		0	0	0	0	0	ave-cM/Mb	H
83-93	f(B6xCAST)-cM	0.121191	0.12594	0.285978	0.0437701	0.232471	0.2754	0.0358431	0.88791		0	111111	0	0	111111	f(B6xCAST)-cM	I
	f(CASTxB6)-cM	-8.21e-05	0.99948	0.216189	0.0935801	0.234898	0.26794	0.0420571	0.88244		0	0	0	0	0	f(CASTxB6)-cM	I
	m(B6xCAST)-cM	0.0030361	0.98502	0.247336	0.0703201	0.284378	0.14169	0.0240501	0.93098		0	0	0	0	0	m(B6xCAST)-cM	I
	m(CASTxB6)-cM	-0.0390451	0.73148	0.351884	0.0361301	0.331918	0.0859201	-0.0102201	0.9782		0	111111	0	0	111111	m(CASTxB6)-cM	I
	female-cM	0.0620981	0.4521	0.26102	0.0598901	0.244939	0.23623	0.0406261	0.88917		0	0	0	0	0	female-cM	I
	male-cM	-0.0262421	0.84802	0.328649	0.0376501	0.328648	0.0809801	0.0009101	0.99762		0	111111	0	0	111111	male-cM	I
	ave-cM	0.0274771	0.76192	0.30507	0.0411301	0.294457	0.13361	0.0260621	0.92831		0	111111	0	0	111111	ave-cM	I
83-93	f(B6xCAST)-cM/Mb	0.121191	0.12796	0.285978	0.0425201	0.232471	0.27145	0.0358431	0.8882		0	111111	0	0	111111	f(B6xCAST)-cM/Mb	I
	f(CASTxB6)-cM/Mb	-8.21e-05	0.99945	0.216189	0.0941501	0.234898	0.26592	0.0420571	0.88292		0	0	0	0	0	f(CASTxB6)-cM/Mb	I
	m(B6xCAST)-cM/Mb	0.0030361	0.98472	0.247336	0.0699201	0.284377	0.14129	0.0240501	0.92927		0	0	0	0	0	m(B6xCAST)-cM/Mb	I
	m(CASTxB6)-cM/Mb	-0.0390451	0.72993	0.351884	0.0365901	0.331918	0.0859101	-0.0102201	0.97923		0	111111	0	0	111111	m(CASTxB6)-cM/Mb	I
	female-cM/Mb	0.0620981	0.45269	0.26102	0.0593101	0.244939	0.23784	0.0406261	0.88942		0	0	0	0	0	female-cM/Mb	I
	male-cM/Mb	-0.0262421	0.84703	0.328648	0.0368801	0.328648	0.0824501	0.0009101	0.99775		0	111111	0	0	111111	male-cM/Mb	I
	ave-cM/Mb	0.0274771	0.76027	0.30507	0.0413801	0.294457	0.13704	0.0260621	0.92812		0	111111	0	0	111111	ave-cM/Mb	I
93-103	f(B6xCAST)-cM	-0.0346391	0.73612	-0.0602381	0.67985	-0.0871521	0.67067	0.0714681	0.76963		0	0	0	0	0	f(B6xCAST)-cM	J
	f(CASTxB6)-cM	0.0154351	0.88682	0.0810931	0.58876	0.0857301	0.70031	0.0961941	0.70212		0	0	0	0	0	f(CASTxB6)-cM	J
	m(B6xCAST)-cM	-0.0755031	0.3603	-0.0832941	0.55532	0.0871841	0.69203	-0.16405	0.50679		0	0	0	0	0	m(B6xCAST)-cM	J
	m(CASTxB6)-cM	-0.0893961	0.17293	0.0597871	0.72956	0.0642491	0.78129	0.0589681	0.7917		0	0	0	0	0	m(CASTxB6)-cM	J
	female-cM	-0.0093481	0.93187	0.0120501	0.93896	-0.0090391	0.96618	0.0856011	0.7317		0	0	0	0	0	female-cM	J
	male-cM	-0.0876951	0.22713	-0.0052721	0.9752	0.0796841	0.73208	-0.0357591	0.88522		0	0	0	0	0	male-cM	J
	ave-cM	-0.0574491	0.56131	0.0040441	0.97945	0.0420051	0.85138	0.0302911	0.9021		0	0	0	0	0	ave-cM	J
93-103	f(B6xCAST)-cM/Mb	-0.0346391	0.73498	-0.0602371	0.67836	-0.0871521	0.67451	0.0714681	0.77143		0	0	0	0	0	f(B6xCAST)-cM/Mb	J
	f(CASTxB6)-cM/Mb	0.0154351	0.88659	0.0810931	0.59408	0.0857311	0.70183	0.0961941	0.70219		0	0	0	0	0	f(CASTxB6)-cM/Mb	J
	m(B6xCAST)-cM/Mb	-0.0755041	0.35696	-0.0832951	0.55863	0.0871841	0.69256	-0.16405	0.50603		0	0	0	0	0	m(B6xCAST)-cM/Mb	J
	m(CASTxB6)-cM/Mb	-0.0893961	0.19164	0.0597871	0.727	0.0642491	0.78216	0.0589681	0.7934		0	0	0	0	0	m(CASTxB6)-cM/Mb	J
	female-cM/Mb	-0.0093481	0.93133	0.0120501	0.9406	-0.0090391	0.96634	0.0856011	0.73025		0	0	0	0	0	female-cM/Mb	J
	male-cM/Mb	-0.0876951	0.22448	-0.0052721	0.97573	0.0796841	0.73139	-0.0357591	0.88534		0	0	0	0	0	male-cM/Mb	J
	ave-cM/Mb	-0.0574501	0.56591	0.0040431	0.98005	0.0420051	0.8499	0.0302911	0.90358		0	0	0	0	0	ave-cM/Mb	J
103-113	f(B6xCAST)-cM	0.0039161	0.96405	0.0398811	0.73107	0.0053791	0.97459	-0.0791541	0.62996		0	0	0	0	0	f(B6xCAST)-cM	K
	f(CASTxB6)-cM	0.0251361	0.74795	0.0121661	0.92647	0.0488171	0.73195	-0.0832601	0.57291		0	0	0	0	0	f(CASTxB6)-cM	K
	m(B6xCAST)-cM	-0.0400861	0.56058	0.0078161	0.94951	-0.0616081	0.77138	-0.155982	0.48397		0	0	0	0	0	m(B6xCAST)-cM	K
	m(CASTxB6)-cM	-0.0233641	0.7246	0.0321871	0.79189	0.0304431	0.8851	-0.0923161	0.64216		0	0	0	0	0	m(CASTxB6)-cM	K
	female-cM	0.0162031	0.84606	0.0267391	0.82237	0.0300001	0.84674	-0.0835831	0.60362		0	0	0	0	0	female-cM	K
	male-cM	-0.0323311	0.63551	0.0215751	0.86563	-0.0141651	0.94934	-0.125972	0.55984		0	0	0	0	0	male-cM	K
	ave-cM	-0.0121891	0.8628	0.0257211	0.84015	0.0070511	0.97145	-0.112589	0.5518		0	0	0	0	0	ave-cM	K
103-113	f(B6xCAST)-cM/Mb	0.0039161	0.9621	0.0398811	0.73525	0.0053791	0.97376	-0.0791541	0.62558		0	0	0	0	0	f(B6xCAST)-cM/Mb	K
	f(CASTxB6)-cM/Mb	0.0251361	0.74915	0.0121661	0.92677	0.0488171	0.73306	-0.0832601	0.57153		0	0	0	0	0	f(CASTxB6)-cM/Mb	K
	m(B6xCAST)-cM/Mb	-0.0400861	0.55928	0.0078161	0.9497	-0.0616081	0.77029	-0.155982	0.48518		0	0	0	0	0	m(B6xCAST)-cM/Mb	K
	m(CASTxB6)-cM/Mb	-0.0233641	0.72513	0.0321871	0.79133	0.0304431	0.88511	-0.0923161	0.64066		0	0	0	0	0	m(CASTxB6)-cM/Mb	K
	female-cM/Mb	0.0162031	0.84584	0.0267391	0.8262	0.0300001	0.84646	-0.0835831	0.60269		0	0	0	0	0	female-cM/Mb	K
	male-cM/Mb	-0.0323311	0.63344	0.0215751	0.86666	-0.0141651	0.94942	-0.125972	0.56165		0	0	0	0	0	male-cM/Mb	K
	ave-cM/Mb	-0.0121891	0.86334	0.0257211	0.83911	0.0070511	0.97223	-0.112589	0.55641		0	0	0	0	0	ave-cM/Mb	K
113-121.7	f(B6xCAST)-cM	-0.0462181	0.63494	-0.0802161	0.57706	-0.163485	0.46642	0.0358631	0.89201		0	0	0	0	0	f(B6xCAST)-cM	L
	f(CASTxB6)-cM	-0.0626271	0.42236	-0.0936471	0.49248	-0.153836	0.54732	0.0126361	0.96171		0	0	0	0	0	f(CASTxB6)-cM	L
	m(B6xCAST)-cM	-0.0917561	0.31659	-0.150373	0.33896	-0.194133	0.38755	0.251488	0.31428		0	0	0	0	0	m(B6xCAST)-cM	L
	m(CASTxB6)-cM	-0.0713931	0.53536	-0.0755241	0.6434	-0.113411	0.65329	0.28161	0.26749		0	0	0	0	0	m(CASTxB6)-cM	L
	female-cM	-0.0567321	0.48691	-0.0900851	0.49952	-0.16396	0.48167	0.0255981	0.9191		0	0	0	0	0	female-cM	L
	male-cM	-0.0852041	0.40129	-0.118766	0.47866	-0.161304	0.50569	0.278767	0.26451		0	0	0	0	0	male-cM	L
	ave-cM	-0.0790321	0.4122	-0.113398	0.48137	-0.168498	0.50328	0.203839	0.42798		0	0	0	0	0	ave-cM	L
113-121.7	f(B6xCAST)-cM/Mb	-0.0462181	0.63368	-0.0802151	0.57303	-0.163485	0.46367	0.0358631	0.89373		0	0	0	0	0	f(B6xCAST)-cM/Mb	L
	f(CASTxB6)-cM/Mb	-0.0626271	0.42447	-0.0936471	0.49588	-0.153836	0.54344	0.0126361	0.96005		0	0	0	0	0	f(CASTxB6)-cM/Mb	L
	m(B6xCAST)-cM/Mb	-0.0917561	0.31855	-0.150374	0.33504	-0.194133	0.38819	0.251488	0.31486		0	0	0	0	0	m(B6xCAST)-cM/Mb	L
	m(CASTxB6)-cM/Mb	-0.0713931	0.53601	-0.0755241	0.64305	-0.113411	0.65304	0.281609	0.26806		0	0	0	0	0	m(CASTxB6)-cM/Mb	L
	female-cM/Mb	-0.0567321	0.48943	-0.0900851	0.50088	-0.16396	0.48071	0.0255981	0.91958		0	0	0	0	0	female-cM/Mb	L
	male-cM/Mb	-0.0852041	0.39693	-0.118766	0.47864	-0.161304	0.49928	0.278767	0.26401		0	0	0	0	0	male-cM/Mb	L
	ave-cM/Mb	-0.0790331	0.41318	-0.113398	0.48078	-0.168498	0.50117	0.203839	0.42839		0	0	0	0	0	ave-cM/Mb	L
3-11.7	f(B6xCAST)-cM	-0.104542	0.2594	-0.185459	0.19192	-0.323934	0.11465	-0.311768	0.19992		0	0	0	0	0	f(B6xCAST)-cM	o
	f(CASTxB6)-cM	-0.0455531	0.60164	-0.0396051	0.79483	-0.0642611	0.71655	0.0004561	0.9996		0	0	0	0	0	f(CASTxB6)-cM	o
	m(B6xCAST)-cM	-0.0935611	0.29048	-0.105908	0.34501	-0.211652	0.30093	-0.242224	0.31698		0	0	0	0	0	m(B6xCAST)-cM	o
	m(CASTxB6)-cM	0.0053091	0.9527	0.0110671	0.94001	-0.0144761	0.93737	-0.0260351	0.92926		0	0	0	0	0	m(CASTxB6)-cM	o
	female-cM	-0.0727081	0.41059	-0.104928	0.47696	-0.176871	0.35019	-0.143052	0.58395		0	0	0	0	0	female-cM	o
	male-cM	-0.0525261	0.56872	-0.0577351	0.63396	-0.137148	0.5504	-0.159468	0.55151		0	0	0	0	0	male-cM	o
	ave-cM	-0.0709131	0.43959	-0.0941951	0.5354	-0.175659	0.40674	-0.158615	0.53849		0	0	0	0	0	ave-cM	o
3-11.7	f(B6xCAST)-cM/Mb	-0.104542	0.25839	-0.185459	0.19354	-0.323933	0.11499	-0.311768	0.1978		0	0	0	0	0	f(B6xCAST)-cM/Mb	o
	f(CASTxB6)-cM/Mb	-0.0455531	0.60301	-0.0396051	0.79368	-0.0642611	0.71713	0.0004571	0.9996		0	0	0	0	0	f(CASTxB6)-cM/Mb	o
	m(B6xCAST)-cM/Mb	-0.0935611	0.29016	-0.105909	0.34416	-0.211652	0.30059	-0.242223	0.31822		0	0	0	0	0	m(B6xCAST)-cM/Mb	o
	m(CASTxB6)-cM/Mb	0.0053091	0.95255	0.0110681	0.9386	-0.0144761	0.93869	-0.0260351	0.92928		0	0	0	0	0	m(CASTxB6)-cM/Mb	o
	female-cM/Mb	-0.0727081	0.41427	-0.104929	0.48046	-0.176871	0.34931	-0.143052	0.5806		0	0	0	0	0	female-cM/Mb	o
	male-cM/Mb	-0.0525261	0.56472	-0.0577351	0.6349	-0.137148	0.55433	-0.159467	0.55116		0	0	0	0	0	male-cM/Mb	o
	ave-cM/Mb	-0.0709131	0.44285	-0.0941951	0.53589	-0.175659	0.40519	-0.158615	0.53844		0	0	0	0	0	ave-cM/Mb	o
11.7-21.7	f(B6xCAST)-cM	-0.0201661	0.78269	-0.0582211	0.52282	0.0199501	0.98044	0.12067	0.58007		0	0	0	0	0	f(B6xCAST)-cM	p
	f(CASTxB6)-cM	-0.0382301	0.45679	-0.0797361	0.2849	-0.0693961	0.80515	-0.0284651	0.96542		0	0	0	0	0	f(CASTxB6)-cM	p
	m(B6xCAST)-cM	-0.0294901	0.56901	-0.0593991	0.41396	-0.0937401	0.33002	-0.112743	0.25627		0	0	0	0	0	m(B6xCAST)-cM	p
	m(CASTxB6)-cM	-0.0342061	0.43491	-0.0637641	0.57615	-0.0868361	0.62729	-0.0830381	0.6195		0	0	0	0	0	m(CASTxB6)-cM	p
	female-cM	-0.0296871	0.60522	-0.0697511	0.38619	-0.0269591	0.94755	0.0436641	0.96161		0	0	0	0	0	female-cM	p
	male-cM	-0.0321611	0.52317	-0.0621041	0.40279	-0.0914361	0.50821	-0.0997471	0.52327		0	0	0	0	0	male-cM	p
	ave-cM	-0.0354661	0.47634	-0.0767981	0.29852	-0.0712851	0.84817	-0.0430711	0.86555		0	0	0	0	0	ave-cM	p
11.7-21.7	f(B6xCAST)-cM/Mb	-0.0201661	0.78803	-0.0582201	0.52972	0.0199501	0.9754	0.12067	0.58457		0	0	0	0	0	f(B6xCAST)-cM/Mb	p
	f(CASTxB6)-cM/Mb	-0.0382301	0.13356	-0.0797361	0.2681	-0.0693961	0.82525	-0.0284651	0.9881		0	0	0	0	0	f(CASTxB6)-cM/Mb	p
	m(B6xCAST)-cM/Mb	-0.0294901	0.42285	-0.0593991	0.24405	-0.0937401	0.2483	-0.112743	0.24239		0	0	0	0	0	m(B6xCAST)-cM/Mb	p
	m(CASTxB6)-cM/Mb	-0.0342061	0.52479	-0.0637641	0.24316	-0.0868361	0.63772	-0.0830381	0.66136		0	0	0	0	0	m(CASTxB6)-cM/Mb	p
	female-cM/Mb	-0.0296871	0.60169	-0.0697511	0.37182	-0.0269601	0.94419	0.0436641	0.97736		0	0	0	0	0	female-cM/Mb	p
	male-cM/Mb	-0.0321611	0.45771	-0.0621041	0.29382	-0.0914361	0.4915	-0.0997471	0.52123		0	0	0	0	0	male-cM/Mb	p
	ave-cM/Mb	-0.0354661	0.47699	-0.0767981	0.28912	-0.0712851	0.8495	-0.0430711	0.8654		0	0	0	0	0	ave-cM/Mb	p
21.7-31.7	f(B6xCAST)-cM	-0.0866331	0.1898	-0.0861161	0.50728	-0.0358051	0.85772	-0.0485121	0.84041		0	0	0	0	0	f(B6xCAST)-cM	q
	f(CASTxB6)-cM	-0.0797471	0.13037	0.0456881	0.70657	0.0707411	0.63904	0.0458701	0.8177		0	0	0	0	0	f(CASTxB6)-cM	q
	m(B6xCAST)-cM	0.239463	0.0517201	0.471284	0.0250001	0.811874	0.0005401	0.860327	0.0003801		0	111111	111111	111111	333333	m(B6xCAST)-cM	q
	m(CASTxB6)-cM	0.0023551	0.97799	0.0985491	0.41929	0.351608	0.0702401	0.312309	0.0929701		0	0	0	0	0	m(CASTxB6)-cM	q
	female-cM	-0.0872141	0.13626	-0.0184501	0.88467	0.0220381	0.89031	0.0024301	0.98316		0	0	0	0	0	female-cM	q
	male-cM	0.140005	0.0849801	0.33441	0.0668201	0.692289	0.0003401	0.715141	0.0004201		0	0	111111	111111	222222	male-cM	q
	ave-cM	0.0080471	0.92596	0.150721	0.1814	0.353115	0.0583101	0.326125	0.0741301		0	0	0	0	0	ave-cM	q
21.7-31.7	f(B6xCAST)-cM/Mb	-0.0866331	0.18735	-0.0861161	0.50456	-0.0358051	0.85732	-0.0485121	0.83881		0	0	0	0	0	f(B6xCAST)-cM/Mb	q
	f(CASTxB6)-cM/Mb	-0.0797471	0.1169	0.0456891	0.70882	0.0707401	0.63891	0.0458691	0.81794		0	0	0	0	0	f(CASTxB6)-cM/Mb	q
	m(B6xCAST)-cM/Mb	0.239464	0.0524001	0.471284	0.0244001	0.811874	0.0006501	0.860327	0.0004501		0	111111	111111	111111	333333	m(B6xCAST)-cM/Mb	q
	m(CASTxB6)-cM/Mb	0.0023551	0.97833	0.0985481	0.41785	0.351608	0.0715401	0.312309	0.0952701		0	0	0	0	0	m(CASTxB6)-cM/Mb	q
	female-cM/Mb	-0.0872141	0.13448	-0.0184491	0.8827	0.0220381	0.88994	0.0024301	0.98283		0	0	0	0	0	female-cM/Mb	q
	male-cM/Mb	0.140005	0.0846701	0.334411	0.0644301	0.69229	0.0002601	0.715141	0.0004101		0	0	111111	111111	222222	male-cM/Mb	q
	ave-cM/Mb	0.0080471	0.92501	0.150721	0.18173	0.353114	0.0580201	0.326125	0.0729401		0	0	0	0	0	ave-cM/Mb	q
31.7-41.7	f(B6xCAST)-cM	0.721229	0.0017701	0.693351	0.0043801	0.649839	0.0210701	0.584627	0.0272601		111111	111111	111111	111111	444444	f(B6xCAST)-cM	r
	f(CASTxB6)-cM	0.441347	0.0139801	0.417003	0.0437901	0.395009	0.0913601	0.29573	0.139		111111	111111	0	0	222222	f(CASTxB6)-cM	r
	m(B6xCAST)-cM	0.687789	0.0031101	0.63904	0.0093501	0.596208	0.0211401	0.515581	0.0506101		111111	111111	111111	0	333333	m(B6xCAST)-cM	r
	m(CASTxB6)-cM	0.5248	0.0015901	0.495483	0.0058601	0.380798	0.0648401	0.283359	0.15771		111111	111111	0	0	222222	m(CASTxB6)-cM	r
	female-cM	0.6035	0.0013101	0.576087	0.0055201	0.541459	0.0187101	0.450864	0.0765301		111111	111111	111111	0	333333	female-cM	r
	male-cM	0.638337	0.0022701	0.594392	0.0057201	0.516221	0.0197001	0.413516	0.0940601		111111	111111	111111	0	333333	male-cM	r
	ave-cM	0.642279	0.0016501	0.605478	0.0053701	0.550921	0.0195301	0.449601	0.0665101		111111	111111	111111	0	333333	ave-cM	r
31.7-41.7	f(B6xCAST)-cM/Mb	0.721229	0.0016501	0.693351	0.0047601	0.649839	0.0212701	0.584627	0.0281301		111111	111111	111111	111111	444444	f(B6xCAST)-cM/Mb	r
	f(CASTxB6)-cM/Mb	0.441347	0.0145201	0.417003	0.0430801	0.39501	0.0912901	0.29573	0.14108		111111	111111	0	0	222222	f(CASTxB6)-cM/Mb	r
	m(B6xCAST)-cM/Mb	0.687789	0.0032501	0.639039	0.0096501	0.596208	0.0224701	0.515581	0.0493901		111111	111111	111111	111111	444444	m(B6xCAST)-cM/Mb	r
	m(CASTxB6)-cM/Mb	0.524801	0.0015801	0.495483	0.0063901	0.380797	0.0644401	0.283358	0.15974		111111	111111	0	0	222222	m(CASTxB6)-cM/Mb	r
	female-cM/Mb	0.6035	0.0014601	0.576087	0.0050601	0.541459	0.0187401	0.450864	0.0765401		111111	111111	111111	0	333333	female-cM/Mb	r
	male-cM/Mb	0.638337	0.0019601	0.594392	0.0066801	0.516221	0.0199501	0.413516	0.0954301		111111	111111	111111	0	333333	male-cM/Mb	r
	ave-cM/Mb	0.642279	0.0015001	0.605478	0.0055801	0.550921	0.0191301	0.449601	0.0662901		111111	111111	111111	0	333333	ave-cM/Mb	r
41.7-51.7	f(B6xCAST)-cM	0.217793	0.0502201	0.309048	0.0438301	0.462303	0.0259501	0.0475261	0.83663		0	111111	111111	0	222222	f(B6xCAST)-cM	s
	f(CASTxB6)-cM	-0.0127861	0.90445	0.288916	0.0649401	0.276163	0.14103	0.106564	0.67697		0	0	0	0	0	f(CASTxB6)-cM	s
	m(B6xCAST)-cM	0.0019161	0.98798	-0.0258001	0.95558	-0.112004	0.75292	-0.192999	0.44944		0	0	0	0	0	m(B6xCAST)-cM	s
	m(CASTxB6)-cM	-0.0280491	0.76521	-0.0814661	0.58642	-0.120132	0.64124	-0.262327	0.21123		0	0	0	0	0	m(CASTxB6)-cM	s
	female-cM	0.106904	0.13469	0.326111	0.0289301	0.391805	0.0442401	0.0825421	0.73917		0	111111	111111	0	222222	female-cM	s
	male-cM	-0.0139021	0.89765	-0.0554801	0.80506	-0.116812	0.68881	-0.230647	0.31202		0	0	0	0	0	male-cM	s
	ave-cM	0.0279741	0.80456	0.0714621	0.68249	0.0471041	0.84136	-0.138652	0.57646		0	0	0	0	0	ave-cM	s
41.7-51.7	f(B6xCAST)-cM/Mb	0.217793	0.0505601	0.309048	0.0424701	0.462302	0.0256001	0.0475271	0.83858		0	111111	111111	0	222222	f(B6xCAST)-cM/Mb	s
	f(CASTxB6)-cM/Mb	-0.0127861	0.90532	0.288915	0.0639601	0.276163	0.13819	0.106565	0.67754		0	0	0	0	0	f(CASTxB6)-cM/Mb	s
	m(B6xCAST)-cM/Mb	0.0019161	0.9874	-0.0258001	0.95711	-0.112004	0.75353	-0.192999	0.45343		0	0	0	0	0	m(B6xCAST)-cM/Mb	s
	m(CASTxB6)-cM/Mb	-0.0280491	0.76494	-0.0814661	0.58305	-0.120132	0.63938	-0.262327	0.21179		0	0	0	0	0	m(CASTxB6)-cM/Mb	s
	female-cM/Mb	0.106904	0.13473	0.32611	0.0280701	0.391805	0.0445701	0.0825421	0.73873		0	111111	111111	0	222222	female-cM/Mb	s
	male-cM/Mb	-0.0139021	0.89454	-0.0554801	0.80629	-0.116812	0.68728	-0.230647	0.31124		0	0	0	0	0	male-cM/Mb	s
	ave-cM/Mb	0.0279741	0.80256	0.0714621	0.68007	0.0471051	0.84115	-0.138652	0.5754		0	0	0	0	0	ave-cM/Mb	s
51.7-61.7	f(B6xCAST)-cM	0.0099171	0.92064	-0.0477561	0.73289	-0.134776	0.52144	0.0176101	0.94142		0	0	0	0	0	f(B6xCAST)-cM	t
	f(CASTxB6)-cM	-0.0606301	0.38425	-0.163936	0.18533	-0.275331	0.17467	-0.137208	0.562		0	0	0	0	0	f(CASTxB6)-cM	t
	m(B6xCAST)-cM	-0.0160631	0.85634	-0.0961941	0.49233	-0.162959	0.45498	0.102564	0.71998		0	0	0	0	0	m(B6xCAST)-cM	t
	m(CASTxB6)-cM	0.0537361	0.56158	0.0278631	0.88631	-0.0016851	0.99409	0.389506	0.0789601		0	0	0	0	0	m(CASTxB6)-cM	t
	female-cM	-0.0364251	0.64038	-0.122898	0.33224	-0.230152	0.26574	-0.0731481	0.76302		0	0	0	0	0	female-cM	t
	male-cM	0.0277431	0.76746	-0.0192501	0.91995	-0.0642581	0.75968	0.288631	0.21776		0	0	0	0	0	male-cM	t
	ave-cM	0.0061331	0.93729	-0.0605841	0.67647	-0.141552	0.50442	0.18543	0.4407		0	0	0	0	0	ave-cM	t
51.7-61.7	f(B6xCAST)-cM/Mb	0.0099171	0.92129	-0.0477561	0.738	-0.134777	0.52293	0.0176091	0.94192		0	0	0	0	0	f(B6xCAST)-cM/Mb	t
	f(CASTxB6)-cM/Mb	-0.0606301	0.38754	-0.163936	0.18407	-0.275331	0.17409	-0.137209	0.56128		0	0	0	0	0	f(CASTxB6)-cM/Mb	t
	m(B6xCAST)-cM/Mb	-0.0160631	0.85383	-0.0961941	0.4911	-0.162959	0.45634	0.102564	0.72142		0	0	0	0	0	m(B6xCAST)-cM/Mb	t
	m(CASTxB6)-cM/Mb	0.0537361	0.55901	0.0278631	0.88601	-0.0016851	0.99408	0.389507	0.0804101		0	0	0	0	0	m(CASTxB6)-cM/Mb	t
	female-cM/Mb	-0.0364251	0.63828	-0.122898	0.32994	-0.230151	0.26584	-0.0731471	0.76502		0	0	0	0	0	female-cM/Mb	t
	male-cM/Mb	0.0277431	0.76782	-0.0192511	0.92043	-0.0642581	0.75882	0.288631	0.21592		0	0	0	0	0	male-cM/Mb	t
	ave-cM/Mb	0.0061331	0.93952	-0.0605841	0.67629	-0.141552	0.50353	0.18543	0.4385		0	0	0	0	0	ave-cM/Mb	t
61.7-71.7	f(B6xCAST)-cM	0.0456671	0.66533	-0.0334121	0.83058	-0.192917	0.35644	-0.152244	0.55273		0	0	0	0	0	f(B6xCAST)-cM	u
	f(CASTxB6)-cM	-0.0042801	0.96711	-0.0954361	0.51047	-0.208045	0.3042	-0.147711	0.56906		0	0	0	0	0	f(CASTxB6)-cM	u
	m(B6xCAST)-cM	-0.0228611	0.74338	-0.0720781	0.47262	-0.179261	0.29925	-0.158609	0.48736		0	0	0	0	0	m(B6xCAST)-cM	u
	m(CASTxB6)-cM	-0.0313451	0.5652	-0.0589861	0.49029	-0.119099	0.49371	-0.185656	0.31712		0	0	0	0	0	m(CASTxB6)-cM	u
	female-cM	0.0227821	0.82554	-0.0685061	0.65675	-0.212137	0.30415	-0.158642	0.51536		0	0	0	0	0	female-cM	u
	male-cM	-0.0276821	0.64049	-0.0653821	0.47065	-0.147862	0.40232	-0.174857	0.37652		0	0	0	0	0	male-cM	u
	ave-cM	-0.0124411	0.87854	-0.0807221	0.53284	-0.214271	0.30398	-0.215303	0.38167		0	0	0	0	0	ave-cM	u
61.7-71.7	f(B6xCAST)-cM/Mb	0.0456681	0.66599	-0.0334121	0.83235	-0.192916	0.36008	-0.152245	0.55456		0	0	0	0	0	f(B6xCAST)-cM/Mb	u
	f(CASTxB6)-cM/Mb	-0.0042801	0.96813	-0.0954361	0.51143	-0.208045	0.30275	-0.147711	0.56903		0	0	0	0	0	f(CASTxB6)-cM/Mb	u
	m(B6xCAST)-cM/Mb	-0.0228611	0.73886	-0.0720781	0.47105	-0.179261	0.30001	-0.158609	0.48581		0	0	0	0	0	m(B6xCAST)-cM/Mb	u
	m(CASTxB6)-cM/Mb	-0.0313451	0.56551	-0.0589861	0.49152	-0.1191	0.49547	-0.185657	0.31642		0	0	0	0	0	m(CASTxB6)-cM/Mb	u
	female-cM/Mb	0.0227821	0.82774	-0.0685051	0.65676	-0.212137	0.3046	-0.158642	0.51444		0	0	0	0	0	female-cM/Mb	u
	male-cM/Mb	-0.0276821	0.64414	-0.0653821	0.47387	-0.147862	0.40317	-0.174857	0.37813		0	0	0	0	0	male-cM/Mb	u
	ave-cM/Mb	-0.0124401	0.87994	-0.0807221	0.53408	-0.21427	0.30393	-0.215303	0.38115		0	0	0	0	0	ave-cM/Mb	u
71.7-81.7	f(B6xCAST)-cM	-0.0701881	0.2731	-0.0948721	0.4328	-0.179546	0.31109	-0.0049271	0.98414		0	0	0	0	0	f(B6xCAST)-cM	v
	f(CASTxB6)-cM	-0.112123	0.22314	-0.130881	0.35087	-0.197056	0.30057	0.0368201	0.88491		0	0	0	0	0	f(CASTxB6)-cM	v
	m(B6xCAST)-cM	-0.0693191	0.15609	-0.134784	0.18305	-0.204918	0.27976	-0.337142	0.0896801		0	0	0	0	0	m(B6xCAST)-cM	v
	m(CASTxB6)-cM	-0.0787561	0.26042	-0.0875811	0.48475	-0.171893	0.3285	-0.195665	0.37007		0	0	0	0	0	m(CASTxB6)-cM	v
	female-cM	-0.0966181	0.17619	-0.122763	0.32188	-0.196458	0.26449	0.0158781	0.95248		0	0	0	0	0	female-cM	v
	male-cM	-0.0772781	0.21932	-0.119129	0.32091	-0.197174	0.2581	-0.281027	0.16357		0	0	0	0	0	male-cM	v
	ave-cM	-0.104626	0.13943	-0.144007	0.28925	-0.232325	0.22895	-0.128102	0.6078		0	0	0	0	0	ave-cM	v
71.7-81.7	f(B6xCAST)-cM/Mb	-0.0701881	0.27301	-0.0948731	0.43244	-0.179546	0.31193	-0.0049281	0.98445		0	0	0	0	0	f(B6xCAST)-cM/Mb	v
	f(CASTxB6)-cM/Mb	-0.112124	0.22504	-0.13088	0.34682	-0.197057	0.2998	0.0368201	0.88443		0	0	0	0	0	f(CASTxB6)-cM/Mb	v
	m(B6xCAST)-cM/Mb	-0.0693191	0.31919	-0.134784	0.20003	-0.204918	0.28001	-0.337142	0.0918701		0	0	0	0	0	m(B6xCAST)-cM/Mb	v
	m(CASTxB6)-cM/Mb	-0.0787561	0.26186	-0.0875811	0.48572	-0.171893	0.32777	-0.195665	0.37093		0	0	0	0	0	m(CASTxB6)-cM/Mb	v
	female-cM/Mb	-0.0966191	0.17776	-0.122763	0.32138	-0.196457	0.2663	0.0158781	0.95326		0	0	0	0	0	female-cM/Mb	v
	male-cM/Mb	-0.0772791	0.21954	-0.119129	0.31998	-0.197174	0.25923	-0.281027	0.16407		0	0	0	0	0	male-cM/Mb	v
	ave-cM/Mb	-0.104626	0.13898	-0.144007	0.29034	-0.232325	0.22929	-0.1281	0.60942		0	0	0	0	0	ave-cM/Mb	v
81.7-91.7	f(B6xCAST)-cM	0.127049	0.12393	0.295915	0.0400501	0.250193	0.23462	0.0652421	0.79785		0	111111	0	0	111111	f(B6xCAST)-cM	w
	f(CASTxB6)-cM	0.0030461	0.97837	0.225699	0.0896401	0.248503	0.22917	0.0683091	0.81074		0	0	0	0	0	f(CASTxB6)-cM	w
	m(B6xCAST)-cM	-0.0015791	0.99181	0.239961	0.0773201	0.268092	0.17531	0.0166591	0.9534		0	0	0	0	0	m(B6xCAST)-cM	w
	m(CASTxB6)-cM	-0.0399791	0.72359	0.35048	0.0378601	0.328659	0.0886901	-0.0120271	0.97594		0	111111	0	0	111111	m(CASTxB6)-cM	w
	female-cM	0.0669241	0.35474	0.271337	0.0555201	0.261579	0.20682	0.0692031	0.8152		0	0	0	0	0	female-cM	w
	male-cM	-0.0284711	0.83405	0.325235	0.0391301	0.320925	0.0910501	-0.0029061	0.99226		0	111111	0	0	111111	male-cM	w
	ave-cM	0.0289351	0.76166	0.30858	0.0402101	0.300146	0.12468	0.0423861	0.88214		0	111111	0	0	111111	ave-cM	w
81.7-91.7	f(B6xCAST)-cM/Mb	0.127049	0.12587	0.295915	0.0391501	0.250193	0.23376	0.0652421	0.79592		0	111111	0	0	111111	f(B6xCAST)-cM/Mb	w
	f(CASTxB6)-cM/Mb	0.0030461	0.97808	0.225699	0.0899701	0.248503	0.22517	0.0683081	0.80996		0	0	0	0	0	f(CASTxB6)-cM/Mb	w
	m(B6xCAST)-cM/Mb	-0.0015791	0.99163	0.239962	0.0788801	0.268092	0.17683	0.0166591	0.95303		0	0	0	0	0	m(B6xCAST)-cM/Mb	w
	m(CASTxB6)-cM/Mb	-0.0399791	0.72377	0.35048	0.0393901	0.328659	0.0885701	-0.0120271	0.97609		0	111111	0	0	111111	m(CASTxB6)-cM/Mb	w
	female-cM/Mb	0.0669241	0.35637	0.271337	0.0548901	0.261579	0.20674	0.0692031	0.81285		0	0	0	0	0	female-cM/Mb	w
	male-cM/Mb	-0.0284711	0.83286	0.325235	0.0388001	0.320925	0.0897201	-0.0029061	0.99213		0	111111	0	0	111111	male-cM/Mb	w
	ave-cM/Mb	0.0289361	0.75818	0.30858	0.0412901	0.300146	0.12473	0.0423861	0.88308		0	111111	0	0	111111	ave-cM/Mb	w
91.7-101.7	f(B6xCAST)-cM	-0.0101031	0.91737	-0.0218691	0.88519	-0.0221611	0.91322	0.150664	0.52433		0	0	0	0	0	f(B6xCAST)-cM	x
	f(CASTxB6)-cM	0.0303621	0.78677	0.106638	0.48672	0.144847	0.51308	0.168751	0.49383		0	0	0	0	0	f(CASTxB6)-cM	x
	m(B6xCAST)-cM	-0.0613491	0.50404	-0.0567921	0.69508	0.13069	0.54156	-0.0985441	0.69755		0	0	0	0	0	m(B6xCAST)-cM	x
	m(CASTxB6)-cM	-0.0744471	0.28881	0.0889711	0.59833	0.113032	0.62697	0.115284	0.6251		0	0	0	0	0	m(CASTxB6)-cM	x
	female-cM	0.0115971	0.9208	0.0465861	0.77755	0.0573641	0.78562	0.164752	0.50088		0	0	0	0	0	female-cM	x
	male-cM	-0.0720021	0.3626	0.0243411	0.88473	0.128482	0.58227	0.0280251	0.91198		0	0	0	0	0	male-cM	x
	ave-cM	-0.0363771	0.73426	0.0415881	0.79339	0.111697	0.61026	0.114482	0.64278		0	0	0	0	0	ave-cM	x
91.7-101.7	f(B6xCAST)-cM/Mb	-0.0101031	0.91793	-0.0218691	0.88537	-0.0221611	0.91488	0.150664	0.52283		0	0	0	0	0	f(B6xCAST)-cM/Mb	x
	f(CASTxB6)-cM/Mb	0.0303621	0.78858	0.106638	0.48214	0.144847	0.51709	0.168751	0.49526		0	0	0	0	0	f(CASTxB6)-cM/Mb	x
	m(B6xCAST)-cM/Mb	-0.0613491	0.50814	-0.0567921	0.69851	0.13069	0.54511	-0.0985441	0.69943		0	0	0	0	0	m(B6xCAST)-cM/Mb	x
	m(CASTxB6)-cM/Mb	-0.0744471	0.26897	0.0889711	0.59868	0.113031	0.62851	0.115284	0.62179		0	0	0	0	0	m(CASTxB6)-cM/Mb	x
	female-cM/Mb	0.0115971	0.9204	0.0465871	0.77579	0.0573641	0.78273	0.164752	0.49912		0	0	0	0	0	female-cM/Mb	x
	male-cM/Mb	-0.0720021	0.3629	0.0243411	0.88581	0.128482	0.58541	0.0280251	0.91495		0	0	0	0	0	male-cM/Mb	x
	ave-cM/Mb	-0.0363771	0.73207	0.0415871	0.79531	0.111698	0.61526	0.114482	0.64167		0	0	0	0	0	ave-cM/Mb	x
101.7-111.7	f(B6xCAST)-cM	-0.0001551	0.99834	0.0682601	0.41626	0.0347171	0.84251	-0.0213511	0.90731		0	0	0	0	0	f(B6xCAST)-cM	y
	f(CASTxB6)-cM	0.0619441	0.36683	0.0613711	0.57765	0.0786861	0.67731	0.0046281	0.98481		0	0	0	0	0	f(CASTxB6)-cM	y
	m(B6xCAST)-cM	-0.0429691	0.28115	0.0299671	0.76792	-0.0381001	0.82057	-0.0884931	0.64339		0	0	0	0	0	m(B6xCAST)-cM	y
	m(CASTxB6)-cM	-0.0135211	0.82612	0.0692471	0.31645	0.0263591	0.83823	-0.0346481	0.82933		0	0	0	0	0	m(CASTxB6)-cM	y
	female-cM	0.0245111	0.74338	0.0695661	0.44624	0.0535781	0.71781	-0.0117241	0.95704		0	0	0	0	0	female-cM	y
	male-cM	-0.0280371	0.60297	0.0528201	0.51664	-0.0037631	0.98295	-0.0605251	0.72085		0	0	0	0	0	male-cM	y
	ave-cM	-0.0119881	0.85944	0.0590291	0.45979	0.0153351	0.92889	-0.0458381	0.78807		0	0	0	0	0	ave-cM	y
101.7-111.7	f(B6xCAST)-cM/Mb	-0.0001551	0.99839	0.0682601	0.41406	0.0347171	0.84171	-0.0213511	0.90791		0	0	0	0	0	f(B6xCAST)-cM/Mb	y
	f(CASTxB6)-cM/Mb	0.0619441	0.36542	0.0613711	0.57888	0.0786871	0.67776	0.0046281	0.98513		0	0	0	0	0	f(CASTxB6)-cM/Mb	y
	m(B6xCAST)-cM/Mb	-0.0429691	0.27624	0.0299671	0.76859	-0.0381001	0.82046	-0.0884931	0.64249		0	0	0	0	0	m(B6xCAST)-cM/Mb	y
	m(CASTxB6)-cM/Mb	-0.0135211	0.8262	0.0692471	0.31555	0.0263591	0.83712	-0.0346481	0.82884		0	0	0	0	0	m(CASTxB6)-cM/Mb	y
	female-cM/Mb	0.0245111	0.7426	0.0695661	0.44861	0.0535781	0.71734	-0.0117241	0.95684		0	0	0	0	0	female-cM/Mb	y
	male-cM/Mb	-0.0280371	0.60258	0.0528201	0.51698	-0.0037631	0.98304	-0.0605251	0.71972		0	0	0	0	0	male-cM/Mb	y
	ave-cM/Mb	-0.0119881	0.85877	0.0590291	0.45861	0.0153351	0.92753	-0.0458381	0.78857		0	0	0	0	0	ave-cM/Mb	y
111.7-121.7	f(B6xCAST)-cM	0.0196831	0.82159	-0.0015111	0.9917	-0.0169241	0.93932	-0.0790051	0.68416		0	0	0	0	0	f(B6xCAST)-cM	z
	f(CASTxB6)-cM	0.0239251	0.85078	0.0132361	0.94385	0.154277	0.49568	-0.0899001	0.63314		0	0	0	0	0	f(CASTxB6)-cM	z
	m(B6xCAST)-cM	-0.0553121	0.59957	-0.111687	0.46242	-0.129756	0.54191	0.175412	0.45243		0	0	0	0	0	m(B6xCAST)-cM	z
	m(CASTxB6)-cM	-0.0678821	0.52991	-0.10058	0.49737	0.0363461	0.86789	0.175505	0.46666		0	0	0	0	0	m(CASTxB6)-cM	z
	female-cM	0.0228071	0.83126	0.0070291	0.97313	0.0830301	0.74754	-0.0864631	0.64975		0	0	0	0	0	female-cM	z
	male-cM	-0.0645441	0.56852	-0.112047	0.47025	-0.0500111	0.81447	0.18603	0.43873		0	0	0	0	0	male-cM	z
	ave-cM	-0.0265471	0.82853	-0.0625931	0.7123	0.0150561	0.94174	0.0502451	0.82094		0	0	0	0	0	ave-cM	z
111.7-121.7	f(B6xCAST)-cM/Mb	0.0196831	0.82389	-0.0015121	0.99088	-0.0169241	0.93896	-0.0790051	0.68282		0	0	0	0	0	f(B6xCAST)-cM/Mb	z
	f(CASTxB6)-cM/Mb	0.0239251	0.84967	0.0132361	0.943	0.154277	0.49562	-0.0899001	0.63753		0	0	0	0	0	f(CASTxB6)-cM/Mb	z
	m(B6xCAST)-cM/Mb	-0.0553121	0.5976	-0.111687	0.46122	-0.129756	0.54024	0.175412	0.45485		0	0	0	0	0	m(B6xCAST)-cM/Mb	z
	m(CASTxB6)-cM/Mb	-0.0678821	0.53065	-0.10058	0.50141	0.0363461	0.86724	0.175505	0.46652		0	0	0	0	0	m(CASTxB6)-cM/Mb	z
	female-cM/Mb	0.0228071	0.83011	0.0070291	0.97421	0.0830301	0.74943	-0.0864631	0.64956		0	0	0	0	0	female-cM/Mb	z
	male-cM/Mb	-0.0645441	0.57209	-0.112047	0.4694	-0.0500121	0.81438	0.18603	0.43759		0	0	0	0	0	male-cM/Mb	z
	ave-cM/Mb	-0.0265471	0.83332	-0.0625931	0.71284	0.0150561	0.94256	0.0502451	0.82082		0	0	0	0	0	ave-cM/Mb	z

[truncated: 9 more sheets: scRNA, snRNA, srpRNA, tRNA, satellite, low complexity, simple repeat, other, unknown]
