# Supplementary material for: Patterns of Recombination Activity on Mouse Chromosome 11 Revealed by High Resolution Mapping
Source: PLoS One. 2010 Dec 8;5(12):e15340. doi: 10.1371/journal.pone.0015340 (PMC2999565; doi:10.1371/journal.pone.0015340)
Supplement: Table S5 — Correlation between recombination rates and inferred binding motifs of C57BL/6J and CAST/EiJ alleles of Prdm9. Allele-specific Prdm9 binding motifs were as described in [19]: C57BL/6J motif – GTnTCnTGnTGnTnnTnnnnnnTnnnnnnnTTnTG CAST/EiJ motif – GTnnTnTnnTGnnTnnnnnTnTnnnTnTTnTG Correlations and their significance were calculated for window sizes of 200 kb, 400 kb and 500 kb as described for Table S3. (XLSX) [file pone.0015340.s005.xlsx]

## Sheet: Full
200KB
cross	B6_Prdm9.cor	B6_Prdm9.sig	CAST_Prdm9.cor	CAST_Prdm9.sig	both_Prdm9.cor	both_Prdm9.sig
f(B6xCAST)-cM	-0.0255401	0.53642	0.0038051	0.92278	0.0038051	0.92407
f(CASTxB6)-cM	-0.0257371	0.52959	-0.0205211	0.60086	-0.0205211	0.6016
m(B6xCAST)-cM	0.0388491	0.34437	-0.0568611	0.15374	-0.0568611	0.15426
m(CASTxB6)-cM	0.0372121	0.3645	-0.0026091	0.94702	-0.0026091	0.94765
female-cM	-0.0268171	0.51469	-0.0090301	0.8175	-0.0090301	0.81961
male-cM	0.0394191	0.3352	-0.0294541	0.45605	-0.0294541	0.45727
ave-cM	0.0108471	0.79005	-0.0225751	0.56853	-0.0225751	0.57168
f(B6xCAST)-cM/Mb	-0.0255401	0.53346	0.0038051	0.92165	0.0038051	0.92243
f(CASTxB6)-cM/Mb	-0.0257371	0.5291	-0.0205201	0.6054	-0.0205201	0.6021
m(B6xCAST)-cM/Mb	0.0388491	0.34598	-0.0568611	0.15325	-0.0568611	0.15231
m(CASTxB6)-cM/Mb	0.0372121	0.36332	-0.0026091	0.94701	-0.0026091	0.94659
female-cM/Mb	-0.0268171	0.51136	-0.0090291	0.81665	-0.0090291	0.81969
male-cM/Mb	0.0394191	0.33442	-0.0294531	0.45555	-0.0294531	0.45552
ave-cM/Mb	0.0108471	0.79403	-0.0225751	0.56869	-0.0225751	0.56841
400KB
cross	B6_Prdm9.cor	B6_Prdm9.sig	CAST_Prdm9.cor	CAST_Prdm9.sig	both_Prdm9.cor	both_Prdm9.sig
f(B6xCAST)-cM	-0.0399251	0.49328	0.0178381	0.75277	0.0178381	0.75527
f(CASTxB6)-cM	-0.0302251	0.6054	-0.0578251	0.30999	-0.0578251	0.31166
m(B6xCAST)-cM	0.0762571	0.18757	-0.0086151	0.87765	-0.0086151	0.88022
m(CASTxB6)-cM	0.0725071	0.21531	0.0525841	0.35713	0.0525841	0.35494
female-cM	-0.0364621	0.53058	-0.0221961	0.69681	-0.0221961	0.69736
male-cM	0.0770141	0.18566	0.0239581	0.67394	0.0239581	0.67303
ave-cM	0.0296531	0.60967	0.0037631	0.94727	0.0037631	0.94651
f(B6xCAST)-cM/Mb	-0.0399251	0.49138	0.0178381	0.7552	0.0178381	0.75314
f(CASTxB6)-cM/Mb	-0.0302251	0.60554	-0.0578251	0.30815	-0.0578251	0.30686
m(B6xCAST)-cM/Mb	0.0762571	0.19062	-0.0086151	0.8803	-0.0086151	0.87926
m(CASTxB6)-cM/Mb	0.0725071	0.21081	0.0525841	0.35562	0.0525841	0.35466
female-cM/Mb	-0.0364621	0.53325	-0.0221961	0.69761	-0.0221961	0.69632
male-cM/Mb	0.0770141	0.18573	0.0239581	0.67356	0.0239581	0.67436
ave-cM/Mb	0.0296531	0.6098	0.0037631	0.94742	0.0037631	0.94861
500KB
cross	B6_Prdm9.cor	B6_Prdm9.sig	CAST_Prdm9.cor	CAST_Prdm9.sig	both_Prdm9.cor	both_Prdm9.sig
f(B6xCAST)-cM	-0.0252281	0.69733	-0.0125641	0.84549	-0.0125641	0.84492
f(CASTxB6)-cM	-0.0143561	0.82702	-0.0593831	0.34518	-0.0593831	0.34644
m(B6xCAST)-cM	0.103545	0.1107	-0.0078381	0.90043	-0.0078381	0.90323
m(CASTxB6)-cM	0.0895641	0.16963	0.0515581	0.42103	0.0515581	0.42093
female-cM	-0.0203031	0.75143	-0.0384911	0.54516	-0.0384911	0.55036
male-cM	0.0997661	0.12578	0.0248101	0.70099	0.0248101	0.6985
ave-cM	0.0503801	0.43975	-0.0046021	0.94288	-0.0046021	0.94292
f(B6xCAST)-cM/Mb	-0.0252281	0.69828	-0.0125641	0.84527	-0.0125641	0.84425
f(CASTxB6)-cM/Mb	-0.0143561	0.82403	-0.0593831	0.34756	-0.0593831	0.34798
m(B6xCAST)-cM/Mb	0.103545	0.11021	-0.0078381	0.90454	-0.0078381	0.90438
m(CASTxB6)-cM/Mb	0.0895641	0.16769	0.0515581	0.42238	0.0515581	0.42368
female-cM/Mb	-0.0203031	0.7539	-0.0384911	0.54593	-0.0384911	0.5469
male-cM/Mb	0.0997661	0.12425	0.0248101	0.70117	0.0248101	0.69951
ave-cM/Mb	0.0503801	0.43923	-0.0046021	0.94314	-0.0046021	0.94375
